# Supplementary material
Source: publisher figshare collection journal article supplement (https://acs.figshare.com/ndownloader/files/8667943)
Supplement: Supplementary file 1 [file 8667943]

 
data_shelx
 
_audit_creation_method            'SHELXL-2016/6'
_shelx_SHELXL_version_number      '2016/6'

# Beginning of Validation Reply Form
_vrf_THETM01_shelx
;
PROBLEM: The value of sine(theta_max)/wavelength is less than 0.550
RESPONSE: The crystal (the largest available) diffracted quite weakly at
high angle.
;
# End of Validation Reply Form

_chemical_name_systematic         ?
_chemical_name_common             ?
_chemical_melting_point           ?
_chemical_formula_moiety          'C44 H36 Co2 N4 Na O8, 3(C18 H36 N2 Na O6)'
_chemical_formula_sum             'C98 H144 Co2 N10 Na4 O26' 
_chemical_formula_weight          2088.04

loop_
 _atom_type_symbol
 _atom_type_description
 _atom_type_scat_dispersion_real
 _atom_type_scat_dispersion_imag
 _atom_type_scat_source
 'C'  'C'   0.0181   0.0091
 'International Tables Vol C Tables 4.2.6.8 and 6.1.1.4'
 'H'  'H'   0.0000   0.0000
 'International Tables Vol C Tables 4.2.6.8 and 6.1.1.4'
 'N'  'N'   0.0311   0.0180
 'International Tables Vol C Tables 4.2.6.8 and 6.1.1.4'
 'O'  'O'   0.0492   0.0322
 'International Tables Vol C Tables 4.2.6.8 and 6.1.1.4'
 'Na'  'Na'   0.1353   0.1239
 'International Tables Vol C Tables 4.2.6.8 and 6.1.1.4'
 'Co'  'Co'  -2.3653   3.6143
 'International Tables Vol C Tables 4.2.6.8 and 6.1.1.4'
 
_space_group_crystal_system       monoclinic
_space_group_IT_number            14
_space_group_name_H-M_alt         'P 21/c'
_space_group_name_Hall            '-P 2ybc'
 
_shelx_space_group_comment
;
The symmetry employed for this shelxl refinement is uniquely defined
by the following loop, which should always be used as a source of
symmetry information in preference to the above space-group names.
They are only intended as comments.
;
 
loop_
 _space_group_symop_operation_xyz
 'x, y, z'
 '-x, y+1/2, -z+1/2'
 '-x, -y, -z'
 'x, -y-1/2, z-1/2'
 
_cell_length_a                    22.2322(16)
_cell_length_b                    12.7790(7)
_cell_length_c                    46.954(3)
_cell_angle_alpha                 90
_cell_angle_beta                  103.289(7)
_cell_angle_gamma                 90
_cell_volume                      12982.7(15)
_cell_formula_units_Z             4
_cell_measurement_temperature     140(2)
_cell_measurement_reflns_used     5928
_cell_measurement_theta_min       3.8580
_cell_measurement_theta_max       40.0290
 
_exptl_crystal_description        prism
_exptl_crystal_colour             black
_exptl_crystal_density_meas       ?
_exptl_crystal_density_method     ?
_exptl_crystal_density_diffrn     1.068          
_exptl_crystal_F_000              4432
_exptl_transmission_factor_min    ?
_exptl_transmission_factor_max    ?
_exptl_crystal_size_max           0.288
_exptl_crystal_size_mid           0.045
_exptl_crystal_size_min           0.025
_exptl_absorpt_coefficient_mu     2.647
_exptl_absorpt_correction_T_min                     0.614
_exptl_absorpt_correction_T_max                     0.932
_exptl_absorpt_correction_type            analytical
_exptl_absorpt_process_details
;
CrysAlisPro 1.171.38.41 (Rigaku Oxford Diffraction, 2015)
Analytical numeric absorption correction using a multifaceted crystal
model based on expressions derived by R.C. Clark & J.S. Reid.
(Clark, R. C. & Reid, J. S. (1995). Acta Cryst. A51, 887-897)
Empirical absorption correction using spherical harmonics,
implemented in SCALE3 ABSPACK scaling algorithm.
;
loop_
_exptl_crystal_face_index_h
_exptl_crystal_face_index_k
_exptl_crystal_face_index_l
_exptl_crystal_face_perp_dist
   7    0   23 0.0162
  -6   -1  -24 0.0128
   8   -6   10 0.0918
 -10   -1   26 0.0213
  -8    6  -12 0.0903
  10    1  -26 0.0131
 -14   -1   10 0.0125
  14    1  -10 0.0125
  
_diffrn_ambient_temperature        140(2)
_diffrn_ambient_environment        N~2~
_diffrn_source                    'micro-focus sealed X-ray tube'
_diffrn_source_type               'SuperNova (Cu) X-ray Source'
_diffrn_radiation_probe           x-ray
_diffrn_radiation_type            'Cu K\a'
_diffrn_radiation_wavelength      1.54184
_diffrn_radiation_monochromator   mirror
_diffrn_measurement_device       'four-circle diffractometer'
_diffrn_measurement_device_type  'SuperNova, Dual, Cu at zero, Atlas'
_diffrn_detector                 'CCD plate'
_diffrn_detector_type             Atlas
_diffrn_detector_area_resol_mean  5.1333
_diffrn_reflns_number             59473
_diffrn_reflns_av_unetI/netI      0.1582
_diffrn_reflns_av_R_equivalents   0.1463
_diffrn_reflns_limit_h_min        -22
_diffrn_reflns_limit_h_max        22
_diffrn_reflns_limit_k_min        -12
_diffrn_reflns_limit_k_max        12
_diffrn_reflns_limit_l_min        -46
_diffrn_reflns_limit_l_max        47
_diffrn_reflns_theta_min          3.591
_diffrn_reflns_theta_max          51.102
_diffrn_reflns_theta_full         51.102
_diffrn_measured_fraction_theta_max   0.991
_diffrn_measured_fraction_theta_full  0.991
_diffrn_reflns_Laue_measured_fraction_max    0.991
_diffrn_reflns_Laue_measured_fraction_full   0.991
_diffrn_reflns_point_group_measured_fraction_max   0.991
_diffrn_reflns_point_group_measured_fraction_full  0.991
_reflns_number_total              13852
_reflns_number_gt                 6505
_reflns_threshold_expression      'I > 2\s(I)'
_reflns_Friedel_coverage          0.000
_reflns_Friedel_fraction_max      .
_reflns_Friedel_fraction_full     .
 
_reflns_special_details
;
 Reflections were merged by SHELXL according to the crystal
 class for the calculation of statistics and refinement.
 
 Structure factors included contributions from the .fab file.
 
 _reflns_Friedel_fraction is defined as the number of unique
 Friedel pairs measured divided by the number that would be
 possible theoretically, ignoring centric projections and
 systematic absences.
;
 
_computing_data_collection        'CrysAlisPro 1.171.38.41 (Rigaku OD, 2015)'
_computing_cell_refinement        'CrysAlisPro 1.171.38.41 (Rigaku OD, 2015)'
_computing_data_reduction         'CrysAlisPro 1.171.38.41 (Rigaku OD, 2015)'
_computing_structure_solution     'SHELXS-97 (Sheldrick, 1990)'
_computing_structure_refinement   'SHELXL-2016/6 (Sheldrick, 2016)'
_computing_molecular_graphics     'Olex2 (Dolomanov et al., 2009)'
_computing_publication_material   'CIFTAB (Sheldrick, 2016)'
_refine_ls_structure_factor_coef  Fsqd
_refine_ls_matrix_type            full
_refine_ls_weighting_scheme       calc
_refine_ls_weighting_details
'w=1/[\s^2^(Fo^2^)+(0.1856P)^2^+37.5996P] where P=(Fo^2^+2Fc^2^)/3'
_atom_sites_solution_primary      direct
_atom_sites_solution_secondary    dfimap
_atom_sites_solution_hydrogens    geom
_refine_ls_hydrogen_treatment     constr
_refine_ls_extinction_method      none
_refine_ls_extinction_coef        .
_refine_ls_number_reflns          13852
_refine_ls_number_parameters      1273
_refine_ls_number_restraints      59
_refine_ls_R_factor_all           0.2102
_refine_ls_R_factor_gt            0.1169
_refine_ls_wR_factor_ref          0.3759
_refine_ls_wR_factor_gt           0.3185
_refine_ls_goodness_of_fit_ref    1.033
_refine_ls_restrained_S_all       1.033
_refine_ls_shift/su_max           0.000
_refine_ls_shift/su_mean          0.000
 
loop_
 _atom_site_label
 _atom_site_type_symbol
 _atom_site_fract_x
 _atom_site_fract_y
 _atom_site_fract_z
 _atom_site_U_iso_or_equiv
 _atom_site_adp_type
 _atom_site_occupancy
 _atom_site_site_symmetry_order  
 _atom_site_calc_flag
 _atom_site_refinement_flags_posn
 _atom_site_refinement_flags_adp
 _atom_site_refinement_flags_occupancy
 _atom_site_disorder_assembly
 _atom_site_disorder_group
Co1 Co 0.31853(9) 0.36055(15) 0.40937(4) 0.0520(6) Uani 1 1 d . . . . .
Co2 Co 0.00706(10) 0.18286(17) 0.37058(5) 0.0625(7) Uani 1 1 d . . . . .
Na1 Na 0.1623(2) 0.2776(4) 0.39082(10) 0.0605(14) Uani 1 1 d . . . . .
Na2 Na 0.1417(3) -0.2096(4) 0.77603(11) 0.0795(17) Uani 1 1 d . . . . .
Na3 Na -0.1721(2) 0.1557(4) 0.47355(11) 0.0644(15) Uani 1 1 d . . . . .
Na4 Na -0.4398(2) -0.9103(4) 0.57786(12) 0.0685(15) Uani 1 1 d . . . . .
O1 O 0.2591(4) 0.3257(6) 0.3757(2) 0.061(2) Uani 1 1 d . . . . .
O2 O 0.2525(3) 0.3362(6) 0.42781(19) 0.052(2) Uani 1 1 d . . . . .
O3 O 0.1659(5) 0.2555(7) 0.33775(19) 0.069(3) Uani 1 1 d . . . . .
O4 O 0.1506(4) 0.2901(7) 0.44251(19) 0.067(3) Uani 1 1 d . . . . .
O5 O 0.0481(5) 0.3119(8) 0.3745(2) 0.089(3) Uani 1 1 d . . . . .
O6 O 0.0864(4) 0.1347(7) 0.38219(18) 0.064(3) Uani 1 1 d . . . . .
O7 O 0.1254(5) 0.4582(7) 0.3934(2) 0.076(3) Uani 1 1 d . . . . .
O8 O 0.2039(4) 0.1035(7) 0.4029(2) 0.071(3) Uani 1 1 d . . . . .
O9 O 0.1037(6) -0.0761(10) 0.7382(2) 0.099(3) Uani 1 1 d . . . . .
O10 O 0.0752(6) -0.2832(12) 0.7321(2) 0.113(4) Uani 1 1 d . . . . .
O11 O 0.1845(5) -0.3625(8) 0.8068(2) 0.082(3) Uani 1 1 d . . . . .
O12 O 0.2178(5) -0.3193(9) 0.7556(2) 0.089(3) Uani 1 1 d . . . . .
O13 O 0.2018(6) -0.1109(9) 0.8190(2) 0.099(3) Uani 1 1 d . . . . .
O14 O 0.0751(6) -0.1033(9) 0.7990(2) 0.096(3) Uani 1 1 d . . . . .
O15 O -0.2259(5) 0.0014(8) 0.4376(2) 0.097(3) Uani 1 1 d . . . . .
O16 O -0.2173(4) 0.0083(7) 0.5003(2) 0.073(3) Uani 1 1 d . . . . .
O17 O -0.0887(5) 0.0753(8) 0.4543(3) 0.103(4) Uani 1 1 d . U . . .
O18 O -0.2501(4) 0.2733(7) 0.4904(2) 0.083(3) Uani 1 1 d . . . . .
O19 O -0.3865(4) -0.9861(9) 0.5405(2) 0.082(3) Uani 1 1 d . . . . .
O20 O -0.4858(4) -1.0849(7) 0.5540(2) 0.069(3) Uani 1 1 d . . . . .
O21 O -0.3567(4) -0.9625(8) 0.6197(2) 0.078(3) Uani 1 1 d . . . . .
O22 O -0.3861(7) -0.7616(8) 0.6058(3) 0.108(4) Uani 1 1 d . . . . .
O23 O -0.5225(5) -0.8037(7) 0.5465(2) 0.083(3) Uani 1 1 d . . . . .
O24 O -0.5267(5) -0.8463(9) 0.6023(3) 0.104(4) Uani 1 1 d . . . . .
N1 N 0.3824(5) 0.3758(7) 0.3913(3) 0.052(3) Uani 1 1 d . . . . .
N2 N 0.3752(5) 0.3969(7) 0.4429(3) 0.051(3) Uani 1 1 d . . . . .
N3 N -0.0715(5) 0.2402(11) 0.3604(2) 0.068(3) Uani 1 1 d . . . . .
N4 N -0.0325(7) 0.0566(11) 0.3666(2) 0.073(3) Uani 1 1 d . . . . .
N5 N 0.2374(6) -0.0893(11) 0.7637(3) 0.088(4) Uani 1 1 d . . . . .
N6 N 0.0495(6) -0.3291(12) 0.7892(3) 0.098(4) Uani 1 1 d . . . . .
N7 N -0.0959(5) 0.0885(10) 0.5175(2) 0.086(3) Uani 0.5 1 d . . P A 1
O70 O -0.0959(5) 0.0885(10) 0.5175(2) 0.086(3) Uani 0.5 1 d . . P A 2
N8 N -0.1207(6) 0.3040(10) 0.5074(2) 0.085(4) Uani 0.5 1 d D . P A 1
O80 O -0.1207(6) 0.3040(10) 0.5074(2) 0.085(4) Uani 0.5 1 d . . P A 2
N9 N -0.1230(5) 0.2843(8) 0.4439(2) 0.084(3) Uani 0.5 1 d D U P A 1
O90 O -0.1230(5) 0.2843(8) 0.4439(2) 0.084(3) Uani 0.5 1 d . U P A 2
N10 N -0.2590(5) 0.2194(8) 0.4320(2) 0.079(3) Uani 0.5 1 d D U P A 1
O100 O -0.2590(5) 0.2194(8) 0.4320(2) 0.079(3) Uani 0.5 1 d . . P A 2
N11 N -0.3983(6) -0.7707(9) 0.5447(3) 0.082(4) Uani 1 1 d . . . . .
N12 N -0.4784(6) -1.0553(10) 0.6167(3) 0.088(4) Uani 1 1 d . . . . .
C1 C 0.2683(7) 0.3030(10) 0.3497(3) 0.057(4) Uani 1 1 d . . . . .
C2 C 0.2185(8) 0.2638(11) 0.3278(4) 0.072(4) Uani 1 1 d . . . . .
C3 C 0.2248(9) 0.2425(12) 0.3009(3) 0.077(5) Uani 1 1 d . . . . .
H3 H 0.188987 0.224043 0.286403 0.093 Uiso 1 1 calc R U . . .
C4 C 0.2813(9) 0.2460(11) 0.2931(4) 0.077(5) Uani 1 1 d . . . . .
H4 H 0.286165 0.221838 0.274587 0.092 Uiso 1 1 calc R U . . .
C5 C 0.3296(8) 0.2863(13) 0.3135(4) 0.085(5) Uani 1 1 d . U . . .
H5 H 0.368115 0.293352 0.308207 0.102 Uiso 1 1 calc R U . . .
C6 C 0.3270(7) 0.3180(11) 0.3416(3) 0.068(4) Uani 1 1 d . U . . .
C7 C 0.3796(7) 0.3561(11) 0.3623(4) 0.078(5) Uani 1 1 d . . . . .
H7 H 0.415996 0.368820 0.355499 0.094 Uiso 1 1 calc R U . . .
C8 C 0.4378(7) 0.4067(10) 0.4096(3) 0.054(4) Uani 1 1 d . . . . .
C9 C 0.4937(8) 0.4252(10) 0.4022(4) 0.071(4) Uani 1 1 d . . . . .
H9 H 0.495812 0.420522 0.382265 0.085 Uiso 1 1 calc R U . . .
C10 C 0.5460(7) 0.4501(10) 0.4230(4) 0.064(4) Uani 1 1 d . . . . .
H10 H 0.583469 0.466037 0.417463 0.076 Uiso 1 1 calc R U . . .
C11 C 0.5431(7) 0.4515(9) 0.4524(4) 0.061(4) Uani 1 1 d . . . . .
H11 H 0.579928 0.462002 0.466985 0.074 Uiso 1 1 calc R U . . .
C12 C 0.4881(7) 0.4379(9) 0.4606(3) 0.061(4) Uani 1 1 d . . . . .
H12 H 0.486203 0.443630 0.480570 0.073 Uiso 1 1 calc R U . . .
C13 C 0.4341(6) 0.4151(9) 0.4385(3) 0.053(4) Uani 1 1 d . . . . .
C14 C 0.3649(7) 0.4010(9) 0.4692(3) 0.056(4) Uani 1 1 d . . . . .
H14 H 0.398490 0.422544 0.484518 0.067 Uiso 1 1 calc R U . . .
C15 C 0.3084(7) 0.3765(9) 0.4775(3) 0.055(4) Uani 1 1 d . . . . .
C16 C 0.3005(7) 0.3850(10) 0.5063(3) 0.064(4) Uani 1 1 d . . . . .
H16 H 0.334706 0.408215 0.521031 0.077 Uiso 1 1 calc R U . . .
C17 C 0.2468(7) 0.3620(10) 0.5145(3) 0.061(4) Uani 1 1 d . . . . .
H17 H 0.245168 0.367027 0.534453 0.073 Uiso 1 1 calc R U . . .
C18 C 0.1951(6) 0.3317(9) 0.4939(3) 0.049(3) Uani 1 1 d . . . . .
H18 H 0.157461 0.316442 0.499322 0.059 Uiso 1 1 calc R U . . .
C19 C 0.1997(7) 0.3241(10) 0.4651(3) 0.059(4) Uani 1 1 d . . . . .
C20 C 0.2546(6) 0.3450(10) 0.4558(3) 0.055(4) Uani 1 1 d . . . . .
C21 C 0.1097(7) 0.2269(13) 0.3171(3) 0.093(5) Uani 1 1 d . . . . .
H21A H 0.075636 0.223716 0.327085 0.139 Uiso 1 1 calc R U . . .
H21B H 0.100381 0.279213 0.301432 0.139 Uiso 1 1 calc R U . . .
H21C H 0.115000 0.158223 0.308678 0.139 Uiso 1 1 calc R U . . .
C22 C 0.0909(6) 0.2896(11) 0.4478(3) 0.077(5) Uani 1 1 d . . . . .
H22A H 0.061398 0.264275 0.430292 0.115 Uiso 1 1 calc R U . . .
H22B H 0.090082 0.243329 0.464308 0.115 Uiso 1 1 calc R U . . .
H22C H 0.079643 0.360727 0.452325 0.115 Uiso 1 1 calc R U . . .
C23 C 0.0225(8) 0.4032(13) 0.3770(3) 0.064(4) Uani 1 1 d . . . . .
C24 C 0.0637(7) 0.4856(12) 0.3879(3) 0.057(4) Uani 1 1 d . . . . .
C25 C 0.0420(9) 0.5839(12) 0.3921(3) 0.078(5) Uani 1 1 d . . . . .
H25 H 0.070108 0.638129 0.399986 0.094 Uiso 1 1 calc R U . . .
C26 C -0.0215(9) 0.6039(14) 0.3846(4) 0.087(5) Uani 1 1 d . . . . .
H26 H -0.037579 0.670354 0.388132 0.105 Uiso 1 1 calc R U . . .
C27 C -0.0599(7) 0.5237(17) 0.3719(4) 0.093(5) Uani 1 1 d . . . . .
H27 H -0.102402 0.538816 0.364208 0.112 Uiso 1 1 calc R U . . .
C28 C -0.0394(8) 0.4213(13) 0.3700(3) 0.069(4) Uani 1 1 d . . . . .
C29 C -0.0861(8) 0.3402(17) 0.3595(4) 0.100(6) Uani 1 1 d . . . . .
H29 H -0.127858 0.360360 0.351968 0.120 Uiso 1 1 calc R U . . .
C30 C -0.1172(7) 0.1589(16) 0.3538(3) 0.075(5) Uani 1 1 d . U . . .
C31 C -0.1812(7) 0.1794(15) 0.3441(3) 0.099(5) Uani 1 1 d . U . . .
H31 H -0.195879 0.249430 0.341512 0.119 Uiso 1 1 calc R U . . .
C32 C -0.2222(9) 0.0965(17) 0.3384(4) 0.113(6) Uani 1 1 d . U . . .
H32 H -0.265114 0.108978 0.331149 0.136 Uiso 1 1 calc R U . . .
C33 C -0.1996(9) -0.0079(17) 0.3434(4) 0.110(6) Uani 1 1 d . U . . .
H33 H -0.227311 -0.065483 0.341121 0.132 Uiso 1 1 calc R U . . .
C34 C -0.1361(9) -0.0232(15) 0.3517(3) 0.098(6) Uani 1 1 d . . . . .
H34 H -0.120386 -0.092659 0.353068 0.117 Uiso 1 1 calc R U . . .
C35 C -0.0950(8) 0.0595(15) 0.3579(3) 0.070(4) Uani 1 1 d . . . . .
C36 C -0.0035(9) -0.0357(16) 0.3721(3) 0.086(5) Uani 1 1 d . . . . .
H36 H -0.028678 -0.096630 0.369347 0.103 Uiso 1 1 calc R U . . .
C37 C 0.0620(8) -0.0510(12) 0.3817(3) 0.072(4) Uani 1 1 d . U . . .
C38 C 0.0890(9) -0.1530(12) 0.3878(3) 0.085(5) Uani 1 1 d . . . . .
H38 H 0.062190 -0.211847 0.384832 0.102 Uiso 1 1 calc R U . . .
C39 C 0.1514(10) -0.1706(13) 0.3977(3) 0.089(5) Uani 1 1 d . . . . .
H39 H 0.166996 -0.239911 0.400794 0.106 Uiso 1 1 calc R U . . .
C40 C 0.1915(8) -0.0849(13) 0.4030(3) 0.077(4) Uani 1 1 d . . . . .
H40 H 0.234650 -0.094935 0.410296 0.092 Uiso 1 1 calc R U . . .
C41 C 0.1673(8) 0.0149(13) 0.3975(3) 0.067(4) Uani 1 1 d . . . . .
C42 C 0.1035(8) 0.0362(12) 0.3865(3) 0.065(4) Uani 1 1 d . U . . .
C43 C 0.1701(7) 0.5381(12) 0.4053(3) 0.087(5) Uani 1 1 d . . . . .
H43A H 0.211906 0.509173 0.408192 0.130 Uiso 1 1 calc R U . . .
H43B H 0.165573 0.597157 0.391642 0.130 Uiso 1 1 calc R U . . .
H43C H 0.163211 0.562227 0.424097 0.130 Uiso 1 1 calc R U . . .
C44 C 0.2657(7) 0.0901(11) 0.4198(3) 0.086(5) Uani 1 1 d . . . . .
H44A H 0.286961 0.157779 0.422160 0.129 Uiso 1 1 calc R U . . .
H44B H 0.264568 0.062074 0.439133 0.129 Uiso 1 1 calc R U . . .
H44C H 0.287805 0.041204 0.409807 0.129 Uiso 1 1 calc R U . . .
C45 C 0.2102(8) -0.0229(15) 0.7372(4) 0.113(6) Uani 1 1 d . . . . .
H45A H 0.236194 0.040093 0.737269 0.135 Uiso 1 1 calc R U . . .
H45B H 0.210371 -0.063114 0.719205 0.135 Uiso 1 1 calc R U . . .
C46 C 0.1479(9) 0.0089(15) 0.7369(4) 0.105(6) Uani 1 1 d . . . . .
H46A H 0.131894 0.049969 0.718885 0.126 Uiso 1 1 calc R U . . .
H46B H 0.149168 0.056086 0.753758 0.126 Uiso 1 1 calc R U . . .
C47 C 0.0823(10) -0.121(2) 0.7091(4) 0.132(9) Uani 1 1 d . . . . .
H47A H 0.058144 -0.068452 0.695548 0.159 Uiso 1 1 calc R U . . .
H47B H 0.117687 -0.143907 0.701205 0.159 Uiso 1 1 calc R U . . .
C48 C 0.0438(10) -0.209(2) 0.7128(4) 0.130(8) Uani 1 1 d . . . . .
H48A H 0.008081 -0.183090 0.720081 0.156 Uiso 1 1 calc R U . . .
H48B H 0.027582 -0.242091 0.693530 0.156 Uiso 1 1 calc R U . . .
C49 C 0.0387(10) -0.3730(18) 0.7377(4) 0.122(7) Uani 1 1 d . U . . .
H49A H 0.066767 -0.433468 0.743278 0.146 Uiso 1 1 calc R U . . .
H49B H 0.008792 -0.391390 0.719317 0.146 Uiso 1 1 calc R U . . .
C50 C 0.0044(7) -0.3570(16) 0.7608(4) 0.115(6) Uani 1 1 d . U . . .
H50A H -0.018303 -0.421685 0.763362 0.138 Uiso 1 1 calc R U . . .
H50B H -0.026100 -0.299909 0.755003 0.138 Uiso 1 1 calc R U . . .
C51 C 0.0787(7) -0.4209(13) 0.8046(4) 0.092(5) Uani 1 1 d . . . . .
H51A H 0.080862 -0.475958 0.790002 0.110 Uiso 1 1 calc R U . . .
H51B H 0.052392 -0.447573 0.817329 0.110 Uiso 1 1 calc R U . . .
C52 C 0.1428(7) -0.4024(12) 0.8230(4) 0.084(5) Uani 1 1 d . . . . .
H52A H 0.140349 -0.352456 0.838792 0.100 Uiso 1 1 calc R U . . .
H52B H 0.159285 -0.469249 0.832285 0.100 Uiso 1 1 calc R U . . .
C53 C 0.2066(8) -0.4427(14) 0.7907(3) 0.097(5) Uani 1 1 d . U . . .
H53A H 0.172168 -0.473003 0.775806 0.116 Uiso 1 1 calc R U . . .
H53B H 0.226523 -0.499325 0.803987 0.116 Uiso 1 1 calc R U . . .
C54 C 0.2544(8) -0.3889(13) 0.7759(4) 0.100(6) Uani 1 1 d . U . . .
H54A H 0.286040 -0.350440 0.790390 0.120 Uiso 1 1 calc R U . . .
H54B H 0.275221 -0.440820 0.765775 0.120 Uiso 1 1 calc R U . . .
C55 C 0.2538(8) -0.2560(16) 0.7405(4) 0.094(5) Uani 1 1 d . . . . .
H55A H 0.227098 -0.232861 0.721728 0.113 Uiso 1 1 calc R U . . .
H55B H 0.287142 -0.299826 0.735983 0.113 Uiso 1 1 calc R U . . .
C56 C 0.2814(8) -0.1650(16) 0.7565(5) 0.116(7) Uani 1 1 d . . . . .
H56A H 0.306952 -0.128842 0.744798 0.139 Uiso 1 1 calc R U . . .
H56B H 0.309454 -0.188392 0.774947 0.139 Uiso 1 1 calc R U . . .
C57 C 0.2636(8) -0.0296(12) 0.7904(4) 0.088(5) Uani 1 1 d . U . . .
H57A H 0.307024 -0.011744 0.790650 0.106 Uiso 1 1 calc R U . . .
H57B H 0.240395 0.036738 0.789932 0.106 Uiso 1 1 calc R U . . .
C58 C 0.2619(8) -0.0848(14) 0.8168(3) 0.094(5) Uani 1 1 d . U . . .
H58A H 0.286508 -0.149769 0.817747 0.113 Uiso 1 1 calc R U . . .
H58B H 0.281367 -0.040926 0.833833 0.113 Uiso 1 1 calc R U . . .
C59 C 0.1649(10) -0.0268(16) 0.8253(4) 0.121(7) Uani 1 1 d . U . . .
H59A H 0.160300 0.026743 0.809762 0.145 Uiso 1 1 calc R U . . .
H59B H 0.185774 0.006243 0.844081 0.145 Uiso 1 1 calc R U . . .
C60 C 0.1032(8) -0.0640(14) 0.8274(4) 0.112(6) Uani 1 1 d . U . . .
H60A H 0.106884 -0.119872 0.842316 0.135 Uiso 1 1 calc R U . . .
H60B H 0.078578 -0.005816 0.832794 0.135 Uiso 1 1 calc R U . . .
C61 C 0.0153(8) -0.1469(14) 0.7977(4) 0.093(5) Uani 1 1 d . . . . .
H61A H -0.009799 -0.144079 0.777405 0.111 Uiso 1 1 calc R U . . .
H61B H -0.006119 -0.105714 0.810292 0.111 Uiso 1 1 calc R U . . .
C62 C 0.0222(8) -0.2608(17) 0.8083(3) 0.108(6) Uani 1 1 d . . . . .
H62A H 0.048584 -0.262844 0.828376 0.129 Uiso 1 1 calc R U . . .
H62B H -0.019017 -0.288367 0.809099 0.129 Uiso 1 1 calc R U . . .
C63 C -0.0565(6) 0.1685(11) 0.5329(3) 0.068(4) Uani 1 1 d . . . . .
H63A H -0.024767 0.186593 0.522032 0.081 Uiso 1 1 calc DR U . A 1
H63B H -0.035132 0.142052 0.552437 0.081 Uiso 1 1 calc R U . A 1
C64 C -0.0919(7) 0.2622(13) 0.5364(4) 0.090(5) Uani 1 1 d . . . . .
H64A H -0.064130 0.315408 0.547888 0.109 Uiso 1 1 calc R U . A 1
H64B H -0.124101 0.244554 0.547079 0.109 Uiso 1 1 calc R U . A 1
C65 C -0.0844(8) 0.3756(17) 0.4932(5) 0.083(8) Uani 0.5 1 d D U P . .
H65A H -0.040544 0.354095 0.498858 0.100 Uiso 0.5 1 calc R U P A 1
H65B H -0.087275 0.446860 0.501067 0.100 Uiso 0.5 1 calc DR U P A 1
C66 C -0.1031(17) 0.3814(15) 0.4604(5) 0.112(7) Uani 0.5 1 d D U P A .
H66A H -0.137201 0.432710 0.455070 0.135 Uiso 0.5 1 calc R U P B 1
H66B H -0.067655 0.410046 0.453385 0.135 Uiso 0.5 1 calc R U P B 1
C67 C -0.1661(6) 0.2971(16) 0.4152(3) 0.126(4) Uani 1 1 d D U . . .
H67A H -0.162892 0.235897 0.402641 0.151 Uiso 1 1 calc R U . A 1
H67B H -0.154990 0.360495 0.405380 0.151 Uiso 1 1 calc R U . A 1
C68 C -0.2311(7) 0.3067(13) 0.4190(4) 0.126(4) Uani 1 1 d D U . . .
H68A H -0.232692 0.369484 0.431111 0.151 Uiso 1 1 calc R U . A 1
H68B H -0.258027 0.320753 0.399443 0.151 Uiso 1 1 calc R U . A 1
C69 C -0.2746(8) 0.1458(14) 0.4082(4) 0.096(5) Uani 1 1 d . . . . .
H69A H -0.241510 0.145969 0.397209 0.115 Uiso 1 1 calc R U . A 1
H69B H -0.313429 0.168111 0.394649 0.115 Uiso 1 1 calc R U . A 1
C70 C -0.2824(6) 0.0353(12) 0.4189(3) 0.073(4) Uani 1 1 d . . . . .
H70A H -0.315809 0.034221 0.429647 0.088 Uiso 1 1 calc R U . . .
H70B H -0.294136 -0.012572 0.401915 0.088 Uiso 1 1 calc R U . . .
C71 C -0.2347(7) -0.0916(12) 0.4555(3) 0.075(4) Uani 1 1 d . . . . .
H71A H -0.264454 -0.140426 0.443267 0.090 Uiso 1 1 calc R U . . .
H71B H -0.194871 -0.128764 0.462040 0.090 Uiso 1 1 calc R U . . .
C72 C -0.2576(7) -0.0612(11) 0.4808(3) 0.079(5) Uani 1 1 d . . . . .
H72A H -0.298305 -0.026908 0.474027 0.095 Uiso 1 1 calc R U . . .
H72B H -0.263897 -0.124999 0.491728 0.095 Uiso 1 1 calc R U . . .
C73 C -0.1695(7) -0.0495(11) 0.5198(3) 0.073(4) Uani 1 1 d . . . . .
H73A H -0.147914 -0.095510 0.508391 0.088 Uiso 1 1 calc R U . . .
H73B H -0.187754 -0.093853 0.532881 0.088 Uiso 1 1 calc R U . . .
C74 C -0.1252(7) 0.0247(12) 0.5373(3) 0.086(5) Uani 1 1 d . . . . .
H74A H -0.093027 -0.014123 0.551385 0.103 Uiso 1 1 calc R U . A 1
H74B H -0.146966 0.071300 0.548453 0.103 Uiso 1 1 calc R U . A 1
C75 C -0.0434(12) 0.0087(19) 0.5074(6) 0.060(7) Uani 0.5 1 d . . P . .
H75A H -0.005605 0.003056 0.523304 0.072 Uiso 0.5 1 calc R U P A 1
H75B H -0.060869 -0.062232 0.502789 0.072 Uiso 0.5 1 calc R U P A 1
C76 C -0.0296(15) 0.056(2) 0.4819(5) 0.081(8) Uani 0.5 1 d . U P A .
H76A H 0.000734 0.011291 0.475171 0.097 Uiso 0.5 1 calc R U P . .
H76B H -0.009454 0.124422 0.487668 0.097 Uiso 0.5 1 calc DR U P . .
C77 C -0.0733(8) 0.1365(13) 0.4307(4) 0.090(5) Uani 1 1 d . . . . .
H77A H -0.034375 0.110013 0.426556 0.108 Uiso 1 1 calc R U . . .
H77B H -0.106475 0.128939 0.412743 0.108 Uiso 1 1 calc R U . . .
C78 C -0.0663(7) 0.2443(12) 0.4389(3) 0.074(4) Uani 1 1 d . . . . .
H78A H -0.054336 0.284876 0.423102 0.089 Uiso 1 1 calc R U . A 1
H78B H -0.033136 0.251822 0.456869 0.089 Uiso 1 1 calc R U . A 1
C79 C -0.1666(7) 0.3830(12) 0.5105(4) 0.097(6) Uani 1 1 d . U . . .
H79A H -0.148411 0.427494 0.527547 0.117 Uiso 1 1 calc R U . A 1
H79B H -0.174235 0.428420 0.492923 0.117 Uiso 1 1 calc DR U . A 1
C80 C -0.2233(9) 0.3461(13) 0.5140(4) 0.098(6) Uani 1 1 d . U . . .
H80A H -0.251833 0.405665 0.513850 0.118 Uiso 1 1 calc R U . . .
H80B H -0.217621 0.310143 0.533105 0.118 Uiso 1 1 calc R U . . .
C81 C -0.2940(7) 0.3252(11) 0.4664(3) 0.079(5) Uani 1 1 d . . . . .
H81A H -0.330965 0.348319 0.473106 0.095 Uiso 1 1 calc R U . . .
H81B H -0.274566 0.387379 0.459692 0.095 Uiso 1 1 calc R U . . .
C82 C -0.3112(7) 0.2514(11) 0.4431(3) 0.076(5) Uani 1 1 d . . . . .
H82A H -0.342681 0.283280 0.427006 0.091 Uiso 1 1 calc R U . A 1
H82B H -0.329978 0.189242 0.450159 0.091 Uiso 1 1 calc R U . A 1
C83 C -0.3448(8) -0.8214(14) 0.5353(4) 0.093(5) Uani 1 1 d . . . . .
H83A H -0.330790 -0.774611 0.521280 0.112 Uiso 1 1 calc R U . . .
H83B H -0.310061 -0.830061 0.552552 0.112 Uiso 1 1 calc R U . . .
C84 C -0.3606(8) -0.9233(13) 0.5215(4) 0.088(5) Uani 1 1 d . . . . .
H84A H -0.390745 -0.914555 0.502541 0.106 Uiso 1 1 calc R U . . .
H84B H -0.323135 -0.957293 0.517840 0.106 Uiso 1 1 calc R U . . .
C85 C -0.4088(8) -1.0913(13) 0.5285(3) 0.093(5) Uani 1 1 d . U . . .
H85A H -0.438929 -1.082954 0.509559 0.112 Uiso 1 1 calc R U . . .
H85B H -0.373526 -1.133005 0.525192 0.112 Uiso 1 1 calc R U . . .
C86 C -0.4375(7) -1.1451(11) 0.5488(3) 0.075(4) Uani 1 1 d . U . . .
H86A H -0.453387 -1.213805 0.540630 0.090 Uiso 1 1 calc R U . . .
H86B H -0.406787 -1.157508 0.567425 0.090 Uiso 1 1 calc R U . . .
C87 C -0.5224(7) -1.1428(12) 0.5701(4) 0.082(5) Uani 1 1 d . . . . .
H87A H -0.532135 -1.212458 0.561002 0.098 Uiso 1 1 calc R U . . .
H87B H -0.561862 -1.105509 0.569066 0.098 Uiso 1 1 calc R U . . .
C88 C -0.4886(7) -1.1569(11) 0.6026(4) 0.081(5) Uani 1 1 d . . . . .
H88A H -0.513822 -1.201101 0.612684 0.097 Uiso 1 1 calc R U . . .
H88B H -0.448478 -1.192410 0.603830 0.097 Uiso 1 1 calc R U . . .
C89 C -0.4257(9) -1.0620(13) 0.6424(4) 0.088(5) Uani 1 1 d . . . . .
H89A H -0.427878 -1.002579 0.655643 0.106 Uiso 1 1 calc R U . . .
H89B H -0.429194 -1.127450 0.653137 0.106 Uiso 1 1 calc R U . . .
C90 C -0.3687(8) -1.0602(13) 0.6348(3) 0.084(5) Uani 1 1 d . . . . .
H90A H -0.366375 -1.120530 0.621874 0.101 Uiso 1 1 calc R U . . .
H90B H -0.335606 -1.068803 0.652779 0.101 Uiso 1 1 calc R U . . .
C91 C -0.3309(9) -0.8783(17) 0.6379(4) 0.116(7) Uani 1 1 d . . . . .
H91A H -0.289126 -0.897656 0.649236 0.139 Uiso 1 1 calc R U . . .
H91B H -0.356903 -0.862930 0.651917 0.139 Uiso 1 1 calc R U . . .
C92 C -0.3269(9) -0.7835(16) 0.6199(6) 0.123(8) Uani 1 1 d . . . . .
H92A H -0.308528 -0.724161 0.632515 0.147 Uiso 1 1 calc R U . . .
H92B H -0.301186 -0.797635 0.605673 0.147 Uiso 1 1 calc R U . . .
C93 C -0.3935(10) -0.6635(17) 0.5869(5) 0.137(7) Uani 1 1 d . U . . .
H93A H -0.437127 -0.640140 0.583137 0.164 Uiso 1 1 calc R U . . .
H93B H -0.367583 -0.607182 0.597905 0.164 Uiso 1 1 calc R U . . .
C94 C -0.3771(11) -0.6778(14) 0.5599(5) 0.138(8) Uani 1 1 d . . . . .
H94A H -0.393312 -0.617727 0.547085 0.166 Uiso 1 1 calc R U . . .
H94B H -0.331512 -0.675995 0.563424 0.166 Uiso 1 1 calc R U . . .
C95 C -0.4495(9) -0.7562(14) 0.5196(4) 0.102(6) Uani 1 1 d . . . . .
H95A H -0.456361 -0.822463 0.508347 0.122 Uiso 1 1 calc R U . . .
H95B H -0.438007 -0.702092 0.506713 0.122 Uiso 1 1 calc R U . . .
C96 C -0.5083(9) -0.7249(14) 0.5270(4) 0.104(6) Uani 1 1 d . . . . .
H96A H -0.503837 -0.655589 0.536633 0.125 Uiso 1 1 calc R U . . .
H96B H -0.541870 -0.720665 0.509014 0.125 Uiso 1 1 calc R U . . .
C97 C -0.5728(8) -0.7715(17) 0.5583(5) 0.123(7) Uani 1 1 d . . . . .
H97A H -0.610560 -0.765916 0.542332 0.148 Uiso 1 1 calc R U . . .
H97B H -0.563963 -0.701532 0.567329 0.148 Uiso 1 1 calc R U . . .
C98 C -0.5834(10) -0.847(2) 0.5805(5) 0.147(8) Uani 1 1 d . . . . .
H98A H -0.618336 -0.825079 0.588937 0.177 Uiso 1 1 calc R U . . .
H98B H -0.592191 -0.918105 0.571978 0.177 Uiso 1 1 calc R U . . .
C99 C -0.5313(9) -0.8976(15) 0.6288(4) 0.104(6) Uani 1 1 d . . . . .
H99A H -0.569160 -0.872974 0.634435 0.125 Uiso 1 1 calc R U . . .
H99B H -0.495435 -0.877383 0.644540 0.125 Uiso 1 1 calc R U . . .
C100 C -0.5335(8) -1.0169(14) 0.6262(4) 0.112(6) Uani 1 1 d . . . . .
H10A H -0.534617 -1.048088 0.645409 0.134 Uiso 1 1 calc R U . . .
H10B H -0.571445 -1.038473 0.611876 0.134 Uiso 1 1 calc R U . . .
 
loop_
 _atom_site_aniso_label
 _atom_site_aniso_U_11
 _atom_site_aniso_U_22
 _atom_site_aniso_U_33
 _atom_site_aniso_U_23
 _atom_site_aniso_U_13
 _atom_site_aniso_U_12
Co1 0.0523(14) 0.0446(13) 0.0561(14) 0.0031(10) 0.0063(11) -0.0033(10)
Co2 0.0628(16) 0.0654(15) 0.0555(14) -0.0033(12) 0.0057(12) -0.0116(12)
Na1 0.062(3) 0.052(3) 0.064(3) -0.001(3) 0.007(3) -0.005(3)
Na2 0.097(4) 0.082(4) 0.052(3) 0.000(3) 0.002(3) 0.002(3)
Na3 0.059(3) 0.066(3) 0.066(3) 0.000(3) 0.010(3) 0.004(3)
Na4 0.066(4) 0.049(3) 0.086(4) 0.005(3) 0.009(3) 0.006(3)
O1 0.051(6) 0.069(6) 0.058(6) 0.003(5) 0.003(5) -0.001(5)
O2 0.044(5) 0.057(6) 0.054(6) 0.001(4) 0.012(5) -0.005(4)
O3 0.051(6) 0.088(7) 0.061(6) 0.007(5) -0.002(6) -0.018(5)
O4 0.046(6) 0.088(7) 0.065(6) -0.013(5) 0.007(5) -0.017(5)
O5 0.084(8) 0.056(7) 0.111(9) 0.003(6) -0.009(6) 0.000(6)
O6 0.078(7) 0.050(6) 0.065(6) 0.000(5) 0.017(5) -0.015(5)
O7 0.087(8) 0.059(6) 0.081(7) 0.000(5) 0.016(6) -0.014(6)
O8 0.050(6) 0.056(6) 0.101(8) 0.004(5) 0.004(6) 0.000(5)
O9 0.118(10) 0.123(10) 0.056(8) 0.016(7) 0.021(7) 0.017(8)
O10 0.133(11) 0.143(12) 0.053(7) -0.010(8) 0.002(7) 0.012(10)
O11 0.074(7) 0.100(8) 0.064(7) 0.003(6) -0.003(6) -0.012(6)
O12 0.094(8) 0.104(8) 0.074(7) 0.007(6) 0.030(7) 0.020(7)
O13 0.123(11) 0.087(9) 0.086(8) -0.002(6) 0.023(8) -0.018(8)
O14 0.103(9) 0.117(9) 0.072(8) 0.001(7) 0.027(7) 0.000(7)
O15 0.080(8) 0.084(8) 0.111(9) 0.005(7) -0.010(7) -0.013(6)
O16 0.070(6) 0.056(6) 0.086(7) -0.005(6) 0.002(6) 0.002(6)
O17 0.107(9) 0.075(7) 0.145(11) 0.010(8) 0.068(8) -0.002(7)
O18 0.077(7) 0.065(7) 0.107(8) 0.018(6) 0.024(6) 0.026(6)
O19 0.075(7) 0.091(8) 0.074(7) 0.004(6) 0.007(6) 0.011(6)
O20 0.066(7) 0.055(6) 0.082(7) 0.015(5) 0.010(6) 0.018(6)
O21 0.089(7) 0.070(7) 0.071(7) 0.008(6) 0.007(6) 0.010(6)
O22 0.158(12) 0.062(7) 0.108(9) 0.009(6) 0.038(9) -0.022(8)
O23 0.076(8) 0.071(7) 0.096(8) 0.018(6) 0.002(6) -0.008(6)
O24 0.088(9) 0.093(8) 0.130(11) 0.011(8) 0.026(9) 0.025(7)
N1 0.056(8) 0.042(7) 0.055(8) 0.008(6) 0.005(7) 0.019(5)
N2 0.048(8) 0.037(6) 0.059(8) -0.007(5) -0.005(6) 0.002(5)
N3 0.077(9) 0.091(10) 0.036(7) -0.014(7) 0.013(6) -0.012(8)
N4 0.085(11) 0.087(11) 0.047(8) -0.006(7) 0.017(7) -0.021(9)
N5 0.081(10) 0.097(10) 0.096(11) 0.015(9) 0.041(9) 0.013(9)
N6 0.093(11) 0.115(12) 0.074(10) -0.013(9) -0.008(9) 0.013(9)
N7 0.099(9) 0.103(9) 0.061(7) -0.017(7) 0.030(7) -0.018(8)
O70 0.099(9) 0.103(9) 0.061(7) -0.017(7) 0.030(7) -0.018(8)
N8 0.088(9) 0.121(11) 0.056(8) -0.010(7) 0.032(7) -0.020(8)
O80 0.088(9) 0.121(11) 0.056(8) -0.010(7) 0.032(7) -0.020(8)
N9 0.107(6) 0.073(6) 0.087(6) 0.019(5) 0.051(5) 0.010(6)
O90 0.107(6) 0.073(6) 0.087(6) 0.019(5) 0.051(5) 0.010(6)
N10 0.083(7) 0.067(7) 0.076(8) -0.006(6) -0.004(6) 0.020(6)
O100 0.083(7) 0.067(7) 0.076(8) -0.006(6) -0.004(6) 0.020(6)
N11 0.103(11) 0.044(8) 0.103(11) 0.036(8) 0.034(9) 0.022(7)
N12 0.078(10) 0.071(10) 0.122(12) 0.015(9) 0.038(10) 0.020(8)
C1 0.058(11) 0.060(9) 0.053(10) 0.004(8) 0.014(9) 0.029(8)
C2 0.065(12) 0.063(10) 0.077(13) 0.004(9) -0.006(11) -0.001(9)
C3 0.099(15) 0.082(12) 0.043(11) 0.004(8) -0.002(10) -0.005(10)
C4 0.080(12) 0.072(11) 0.067(11) -0.015(9) -0.005(11) 0.009(9)
C5 0.088(12) 0.106(13) 0.070(9) 0.007(10) 0.035(11) 0.017(11)
C6 0.055(10) 0.089(11) 0.052(8) 0.001(8) -0.004(9) 0.012(8)
C7 0.072(12) 0.074(11) 0.092(13) 0.023(10) 0.026(11) -0.002(9)
C8 0.050(11) 0.058(9) 0.053(10) -0.003(7) 0.009(9) 0.005(7)
C9 0.079(12) 0.048(9) 0.088(12) 0.019(8) 0.024(11) 0.007(8)
C10 0.046(10) 0.054(9) 0.088(12) 0.011(9) 0.010(9) 0.006(7)
C11 0.051(10) 0.042(8) 0.083(12) 0.000(8) -0.002(9) -0.028(7)
C12 0.055(10) 0.039(8) 0.085(11) -0.011(7) 0.007(9) -0.009(7)
C13 0.038(10) 0.028(7) 0.089(13) -0.014(7) 0.003(9) -0.007(6)
C14 0.075(12) 0.031(8) 0.055(10) -0.008(7) 0.000(9) -0.008(7)
C15 0.060(10) 0.033(8) 0.063(11) -0.011(7) -0.006(9) -0.011(7)
C16 0.068(12) 0.062(10) 0.055(11) -0.009(8) -0.001(9) -0.003(8)
C17 0.067(11) 0.050(9) 0.062(10) -0.010(7) 0.006(10) 0.013(8)
C18 0.051(9) 0.042(8) 0.057(10) -0.003(7) 0.016(8) -0.003(7)
C19 0.065(11) 0.059(9) 0.051(10) 0.021(7) 0.013(9) 0.006(8)
C20 0.038(9) 0.074(10) 0.051(10) 0.016(8) 0.009(8) -0.008(7)
C21 0.080(12) 0.107(13) 0.092(12) 0.000(10) 0.020(11) -0.027(10)
C22 0.048(10) 0.089(12) 0.091(12) 0.028(9) 0.010(9) -0.011(8)
C23 0.074(13) 0.062(11) 0.050(9) -0.004(8) 0.001(8) 0.010(10)
C24 0.052(10) 0.066(11) 0.050(9) 0.015(8) 0.003(8) 0.005(9)
C25 0.132(17) 0.060(12) 0.051(10) 0.007(8) 0.039(10) 0.001(11)
C26 0.066(12) 0.077(13) 0.116(15) -0.014(10) 0.017(11) 0.016(11)
C27 0.047(11) 0.127(17) 0.111(14) 0.013(13) 0.030(10) 0.030(12)
C28 0.067(12) 0.069(12) 0.067(10) -0.005(8) 0.008(9) 0.012(11)
C29 0.063(12) 0.109(16) 0.135(17) 0.028(13) 0.039(11) 0.007(12)
C30 0.069(7) 0.118(15) 0.037(9) -0.005(9) 0.010(8) -0.035(10)
C31 0.078(9) 0.138(12) 0.069(11) -0.023(10) -0.008(9) -0.023(9)
C32 0.071(11) 0.160(13) 0.096(13) -0.028(14) -0.007(11) -0.035(9)
C33 0.094(15) 0.148(12) 0.081(13) -0.009(13) 0.007(12) -0.049(13)
C34 0.101(14) 0.144(17) 0.045(10) 0.001(10) 0.008(10) -0.058(14)
C35 0.065(12) 0.094(14) 0.055(10) -0.016(9) 0.022(9) -0.044(11)
C36 0.101(15) 0.091(14) 0.058(11) 0.013(10) 0.001(10) -0.044(12)
C37 0.097(14) 0.069(12) 0.053(9) -0.008(8) 0.024(9) -0.028(8)
C38 0.121(16) 0.043(11) 0.076(11) 0.010(8) -0.008(11) -0.023(10)
C39 0.131(17) 0.057(11) 0.068(11) -0.004(9) 0.002(11) -0.011(12)
C40 0.093(12) 0.069(12) 0.066(11) -0.011(9) 0.012(9) 0.001(11)
C41 0.095(14) 0.067(12) 0.047(9) -0.013(8) 0.031(9) -0.019(11)
C42 0.082(13) 0.051(10) 0.064(10) -0.012(8) 0.019(9) -0.016(7)
C43 0.083(11) 0.087(12) 0.087(12) -0.029(10) 0.012(9) -0.016(10)
C44 0.081(12) 0.075(11) 0.096(12) -0.014(9) 0.008(10) 0.011(9)
C45 0.080(13) 0.138(17) 0.119(15) 0.054(13) 0.023(12) 0.014(12)
C46 0.118(17) 0.104(15) 0.109(15) 0.026(11) 0.057(13) 0.030(13)
C47 0.115(17) 0.23(3) 0.062(14) 0.052(16) 0.033(13) 0.046(17)
C48 0.132(19) 0.20(2) 0.046(12) 0.037(14) -0.009(12) 0.039(18)
C49 0.129(19) 0.140(19) 0.078(13) -0.025(14) -0.015(10) 0.033(16)
C50 0.062(12) 0.151(18) 0.120(16) -0.001(14) -0.007(10) 0.014(11)
C51 0.079(12) 0.092(13) 0.100(13) 0.014(11) 0.010(11) 0.014(10)
C52 0.073(12) 0.076(11) 0.095(13) -0.001(10) 0.005(11) 0.007(9)
C53 0.117(15) 0.102(14) 0.059(11) -0.004(10) -0.004(9) 0.028(11)
C54 0.101(13) 0.115(15) 0.076(12) 0.021(10) 0.002(9) 0.061(11)
C55 0.088(13) 0.119(16) 0.086(13) 0.020(12) 0.040(11) 0.017(12)
C56 0.079(13) 0.102(16) 0.17(2) 0.022(14) 0.029(14) -0.004(13)
C57 0.106(13) 0.072(11) 0.090(12) -0.017(9) 0.030(11) -0.014(10)
C58 0.087(13) 0.114(15) 0.069(10) -0.012(9) -0.008(10) -0.016(11)
C59 0.174(18) 0.098(15) 0.109(15) -0.027(12) 0.071(15) -0.027(15)
C60 0.126(14) 0.097(14) 0.116(15) -0.063(12) 0.032(13) 0.002(11)
C61 0.093(14) 0.100(14) 0.086(13) 0.019(11) 0.023(11) 0.032(12)
C62 0.093(13) 0.16(2) 0.054(11) -0.005(12) -0.009(10) 0.014(13)
C63 0.063(10) 0.066(10) 0.073(10) -0.013(8) 0.015(8) -0.012(9)
C64 0.073(12) 0.093(13) 0.103(15) -0.036(11) 0.015(10) -0.026(10)
C65 0.11(3) 0.037(16) 0.113(8) 0.008(9) 0.04(2) 0.001(16)
C66 0.115(8) 0.108(7) 0.115(7) -0.003(5) 0.029(5) 0.000(5)
C67 0.122(5) 0.130(5) 0.122(5) 0.005(3) 0.023(3) -0.006(3)
C68 0.122(5) 0.130(5) 0.122(5) 0.005(3) 0.023(3) -0.006(3)
C69 0.093(13) 0.099(14) 0.092(13) 0.006(12) 0.011(10) -0.001(11)
C70 0.054(10) 0.093(13) 0.059(10) -0.005(9) -0.012(8) 0.021(9)
C71 0.077(11) 0.069(11) 0.079(12) 0.001(9) 0.019(9) -0.001(8)
C72 0.104(13) 0.050(9) 0.084(12) 0.011(9) 0.023(11) -0.025(9)
C73 0.072(11) 0.075(11) 0.071(10) -0.015(9) 0.015(9) -0.003(9)
C74 0.104(13) 0.084(12) 0.074(11) -0.019(10) 0.031(10) -0.017(10)
C75 0.068(19) 0.039(16) 0.070(19) 0.008(14) 0.009(16) 0.011(14)
C76 0.12(2) 0.042(17) 0.10(2) -0.017(17) 0.075(11) -0.005(17)
C77 0.095(13) 0.087(13) 0.101(14) -0.028(11) 0.049(11) -0.007(10)
C78 0.078(12) 0.077(12) 0.066(10) 0.009(9) 0.014(9) -0.005(9)
C79 0.166(17) 0.055(11) 0.071(11) 0.015(9) 0.029(13) -0.007(12)
C80 0.152(16) 0.078(13) 0.065(11) -0.021(10) 0.026(12) -0.008(11)
C81 0.093(12) 0.042(9) 0.096(12) 0.000(9) 0.010(10) 0.030(8)
C82 0.098(13) 0.051(10) 0.072(11) 0.001(8) 0.003(10) 0.005(9)
C83 0.094(13) 0.092(14) 0.098(13) 0.019(11) 0.030(11) -0.019(11)
C84 0.118(14) 0.074(12) 0.086(12) 0.021(10) 0.049(11) -0.003(10)
C85 0.124(15) 0.083(13) 0.069(11) -0.006(9) 0.014(9) 0.002(11)
C86 0.092(12) 0.052(10) 0.072(11) 0.002(8) -0.002(8) 0.010(9)
C87 0.063(11) 0.066(11) 0.112(14) 0.010(10) 0.013(11) 0.017(9)
C88 0.085(12) 0.039(10) 0.125(15) 0.024(9) 0.037(11) 0.013(8)
C89 0.102(14) 0.082(12) 0.090(14) -0.002(10) 0.042(13) -0.004(11)
C90 0.107(14) 0.096(14) 0.043(9) -0.008(9) 0.003(9) 0.009(11)
C91 0.130(17) 0.117(17) 0.073(12) -0.040(13) -0.034(11) -0.013(13)
C92 0.086(15) 0.082(15) 0.22(3) -0.074(16) 0.072(17) -0.016(12)
C93 0.143(9) 0.131(9) 0.136(8) 0.001(5) 0.033(5) -0.002(5)
C94 0.23(2) 0.050(12) 0.17(2) -0.022(12) 0.113(19) -0.026(13)
C95 0.109(15) 0.100(14) 0.084(12) 0.046(10) -0.005(12) 0.026(11)
C96 0.100(15) 0.087(13) 0.130(17) 0.004(12) 0.039(13) -0.002(11)
C97 0.078(13) 0.156(19) 0.157(19) 0.048(16) 0.072(14) 0.011(13)
C98 0.100(17) 0.21(3) 0.133(19) 0.026(18) 0.035(16) 0.013(17)
C99 0.121(16) 0.113(17) 0.093(14) -0.007(12) 0.057(12) 0.011(12)
C100 0.117(15) 0.088(14) 0.140(17) 0.036(12) 0.049(13) 0.048(12)
 
_geom_special_details
;
 All esds (except the esd in the dihedral angle between two l.s. planes)
 are estimated using the full covariance matrix.  The cell esds are taken
 into account individually in the estimation of esds in distances, angles
 and torsion angles; correlations between esds in cell parameters are only
 used when they are defined by crystal symmetry.  An approximate (isotropic)
 treatment of cell esds is used for estimating esds involving l.s. planes.
;
 
loop_
 _geom_bond_atom_site_label_1
 _geom_bond_atom_site_label_2
 _geom_bond_distance
 _geom_bond_site_symmetry_2
 _geom_bond_publ_flag
Co1 N1 1.825(11) . ?
Co1 N2 1.835(10) . ?
Co1 O1 1.866(8) . ?
Co1 O2 1.893(8) . ?
Co1 Na1 3.543(5) . ?
Co2 N4 1.826(13) . ?
Co2 O6 1.830(9) . ?
Co2 N3 1.852(13) . ?
Co2 O5 1.873(10) . ?
Co2 Na1 3.574(5) . ?
Na1 O8 2.426(10) . ?
Na1 O2 2.449(9) . ?
Na1 O6 2.455(9) . ?
Na1 O7 2.463(11) . ?
Na1 O1 2.492(10) . ?
Na1 O4 2.505(10) . ?
Na1 O5 2.517(11) . ?
Na1 O3 2.527(11) . ?
Na2 O10 2.434(13) . ?
Na2 O14 2.437(13) . ?
Na2 O9 2.468(12) . ?
Na2 O11 2.486(11) . ?
Na2 O13 2.492(12) . ?
Na2 O12 2.548(12) . ?
Na2 N6 2.739(16) . ?
Na2 N5 2.793(14) . ?
Na3 O17 2.467(12) . ?
Na3 O70 2.503(12) . ?
Na3 N7 2.503(12) . ?
Na3 O100 2.543(11) . ?
Na3 N10 2.543(11) . ?
Na3 O18 2.553(10) . ?
Na3 O90 2.554(11) . ?
Na3 N9 2.554(11) . ?
Na3 N8 2.567(12) . ?
Na3 O80 2.567(12) . ?
Na3 O16 2.591(11) . ?
Na3 O15 2.691(11) . ?
Na4 O22 2.457(12) . ?
Na4 O21 2.459(10) . ?
Na4 O23 2.482(11) . ?
Na4 O19 2.526(11) . ?
Na4 O24 2.594(13) . ?
Na4 O20 2.598(10) . ?
Na4 N11 2.668(12) . ?
Na4 N12 2.865(14) . ?
O1 C1 1.316(14) . ?
O2 C20 1.307(14) . ?
O3 C2 1.360(17) . ?
O3 C21 1.441(15) . ?
O4 C19 1.403(15) . ?
O4 C22 1.405(14) . ?
O5 C23 1.315(15) . ?
O6 C42 1.317(15) . ?
O7 C24 1.380(15) . ?
O7 C43 1.444(15) . ?
O8 C41 1.384(15) . ?
O8 C44 1.430(15) . ?
O9 C47 1.45(2) . ?
O9 C46 1.475(19) . ?
O10 C48 1.39(2) . ?
O10 C49 1.46(2) . ?
O11 C52 1.421(17) . ?
O11 C53 1.425(17) . ?
O12 C54 1.416(15) . ?
O12 C55 1.434(18) . ?
O13 C58 1.402(17) . ?
O13 C59 1.43(2) . ?
O14 C61 1.429(18) . ?
O14 C60 1.429(17) . ?
O15 C70 1.426(14) . ?
O15 C71 1.496(16) . ?
O16 C72 1.432(15) . ?
O16 C73 1.438(15) . ?
O17 C77 1.457(17) . ?
O17 C76 1.64(3) . ?
O18 C80 1.464(17) . ?
O18 C81 1.470(15) . ?
O19 C84 1.414(15) . ?
O19 C85 1.497(17) . ?
O20 C86 1.386(15) . ?
O20 C87 1.438(16) . ?
O21 C91 1.412(17) . ?
O21 C90 1.488(17) . ?
O22 C92 1.36(2) . ?
O22 C93 1.52(2) . ?
O23 C97 1.418(18) . ?
O23 C96 1.444(18) . ?
O24 C98 1.43(2) . ?
O24 C99 1.432(18) . ?
N1 C7 1.370(17) . ?
N1 C8 1.387(15) . ?
N2 C14 1.312(15) . ?
N2 C13 1.389(15) . ?
N3 C29 1.317(19) . ?
N3 C30 1.437(18) . ?
N4 C36 1.340(19) . ?
N4 C35 1.355(17) . ?
N5 C56 1.47(2) . ?
N5 C57 1.470(18) . ?
N5 C45 1.512(18) . ?
N6 C51 1.450(18) . ?
N6 C62 1.48(2) . ?
N6 C50 1.518(19) . ?
N7 C63 1.429(15) . ?
N7 C74 1.493(16) . ?
N7 C75 1.70(3) . ?
O70 C63 1.429(15) . ?
O70 C74 1.493(16) . ?
O70 C75 1.70(3) . ?
N8 C79 1.466(18) . ?
N8 C64 1.467(18) . ?
N8 C65 1.477(5) . ?
O80 C79 1.466(18) . ?
O80 C64 1.467(18) . ?
O80 C65 1.477(5) . ?
N9 C78 1.431(16) . ?
N9 C66 1.474(5) . ?
N9 C67 1.475(5) . ?
O90 C78 1.431(16) . ?
O90 C66 1.474(5) . ?
O90 C67 1.475(5) . ?
N10 C82 1.435(16) . ?
N10 C69 1.442(17) . ?
N10 C68 1.477(5) . ?
O100 C82 1.435(16) . ?
O100 C69 1.442(17) . ?
O100 C68 1.477(5) . ?
N11 C94 1.408(19) . ?
N11 C95 1.453(17) . ?
N11 C83 1.508(19) . ?
N12 C88 1.452(18) . ?
N12 C89 1.476(18) . ?
N12 C100 1.482(18) . ?
C1 C2 1.419(18) . ?
C1 C6 1.454(18) . ?
C2 C3 1.33(2) . ?
C3 C4 1.390(19) . ?
C3 H3 0.9500 . ?
C4 C5 1.367(19) . ?
C4 H4 0.9500 . ?
C5 C6 1.390(19) . ?
C5 H5 0.9500 . ?
C6 C7 1.427(19) . ?
C7 H7 0.9500 . ?
C8 C13 1.384(17) . ?
C8 C9 1.385(18) . ?
C9 C10 1.373(17) . ?
C9 H9 0.9500 . ?
C10 C11 1.396(18) . ?
C10 H10 0.9500 . ?
C11 C12 1.376(17) . ?
C11 H11 0.9500 . ?
C12 C13 1.425(17) . ?
C12 H12 0.9500 . ?
C14 C15 1.432(18) . ?
C14 H14 0.9500 . ?
C15 C16 1.409(18) . ?
C15 C20 1.439(17) . ?
C16 C17 1.366(18) . ?
C16 H16 0.9500 . ?
C17 C18 1.376(16) . ?
C17 H17 0.9500 . ?
C18 C19 1.384(17) . ?
C18 H18 0.9500 . ?
C19 C20 1.412(17) . ?
C21 H21A 0.9800 . ?
C21 H21B 0.9800 . ?
C21 H21C 0.9800 . ?
C22 H22A 0.9800 . ?
C22 H22B 0.9800 . ?
C22 H22C 0.9800 . ?
C23 C28 1.360(19) . ?
C23 C24 1.413(18) . ?
C24 C25 1.376(18) . ?
C25 C26 1.40(2) . ?
C25 H25 0.9500 . ?
C26 C27 1.38(2) . ?
C26 H26 0.9500 . ?
C27 C28 1.40(2) . ?
C27 H27 0.9500 . ?
C28 C29 1.47(2) . ?
C29 H29 0.9500 . ?
C30 C35 1.36(2) . ?
C30 C31 1.41(2) . ?
C31 C32 1.38(2) . ?
C31 H31 0.9500 . ?
C32 C33 1.42(2) . ?
C32 H32 0.9500 . ?
C33 C34 1.39(2) . ?
C33 H33 0.9500 . ?
C34 C35 1.38(2) . ?
C34 H34 0.9500 . ?
C36 C37 1.44(2) . ?
C36 H36 0.9500 . ?
C37 C42 1.431(18) . ?
C37 C38 1.44(2) . ?
C38 C39 1.38(2) . ?
C38 H38 0.9500 . ?
C39 C40 1.40(2) . ?
C39 H39 0.9500 . ?
C40 C41 1.386(19) . ?
C40 H40 0.9500 . ?
C41 C42 1.420(19) . ?
C43 H43A 0.9800 . ?
C43 H43B 0.9800 . ?
C43 H43C 0.9800 . ?
C44 H44A 0.9800 . ?
C44 H44B 0.9800 . ?
C44 H44C 0.9800 . ?
C45 C46 1.44(2) . ?
C45 H45A 0.9900 . ?
C45 H45B 0.9900 . ?
C46 H46A 0.9900 . ?
C46 H46B 0.9900 . ?
C47 C48 1.45(3) . ?
C47 H47A 0.9900 . ?
C47 H47B 0.9900 . ?
C48 H48A 0.9900 . ?
C48 H48B 0.9900 . ?
C49 C50 1.47(2) . ?
C49 H49A 0.9900 . ?
C49 H49B 0.9900 . ?
C50 H50A 0.9900 . ?
C50 H50B 0.9900 . ?
C51 C52 1.505(18) . ?
C51 H51A 0.9900 . ?
C51 H51B 0.9900 . ?
C52 H52A 0.9900 . ?
C52 H52B 0.9900 . ?
C53 C54 1.56(2) . ?
C53 H53A 0.9900 . ?
C53 H53B 0.9900 . ?
C54 H54A 0.9900 . ?
C54 H54B 0.9900 . ?
C55 C56 1.44(2) . ?
C55 H55A 0.9900 . ?
C55 H55B 0.9900 . ?
C56 H56A 0.9900 . ?
C56 H56B 0.9900 . ?
C57 C58 1.44(2) . ?
C57 H57A 0.9900 . ?
C57 H57B 0.9900 . ?
C58 H58A 0.9900 . ?
C58 H58B 0.9900 . ?
C59 C60 1.47(2) . ?
C59 H59A 0.9900 . ?
C59 H59B 0.9900 . ?
C60 H60A 0.9900 . ?
C60 H60B 0.9900 . ?
C61 C62 1.53(2) . ?
C61 H61A 0.9900 . ?
C61 H61B 0.9900 . ?
C62 H62A 0.9900 . ?
C62 H62B 0.9900 . ?
C63 C64 1.462(18) . ?
C63 H63A 0.9900 . ?
C63 H63B 0.9900 . ?
C64 H64A 0.9900 . ?
C64 H64B 0.9900 . ?
C65 C66 1.502(5) . ?
C65 H65A 0.9900 . ?
C65 H65B 0.9900 . ?
C66 H66A 0.9900 . ?
C66 H66B 0.9900 . ?
C67 C68 1.501(5) . ?
C67 H67A 0.9900 . ?
C67 H67B 0.9900 . ?
C68 H68A 0.9900 . ?
C68 H68B 0.9900 . ?
C69 C70 1.521(19) . ?
C69 H69A 0.9900 . ?
C69 H69B 0.9900 . ?
C70 H70A 0.9900 . ?
C70 H70B 0.9900 . ?
C71 C72 1.449(18) . ?
C71 H71A 0.9900 . ?
C71 H71B 0.9900 . ?
C72 H72A 0.9900 . ?
C72 H72B 0.9900 . ?
C73 C74 1.473(17) . ?
C73 H73A 0.9900 . ?
C73 H73B 0.9900 . ?
C74 H74A 0.9900 . ?
C74 H74B 0.9900 . ?
C75 C76 1.44(3) . ?
C75 H75A 0.9900 . ?
C75 H75B 0.9900 . ?
C75 H76A 1.13(4) 3_556 ?
C76 H76A 0.9900 . ?
C76 H76B 0.9900 . ?
C77 C78 1.429(19) . ?
C77 H77A 0.9900 . ?
C77 H77B 0.9900 . ?
C78 H78A 0.9900 . ?
C78 H78B 0.9900 . ?
C79 C80 1.39(2) . ?
C79 H79A 0.9900 . ?
C79 H79B 0.9900 . ?
C80 H80A 0.9900 . ?
C80 H80B 0.9900 . ?
C81 C82 1.430(17) . ?
C81 H81A 0.9900 . ?
C81 H81B 0.9900 . ?
C82 H82A 0.9900 . ?
C82 H82B 0.9900 . ?
C83 C84 1.46(2) . ?
C83 H83A 0.9900 . ?
C83 H83B 0.9900 . ?
C84 H84A 0.9900 . ?
C84 H84B 0.9900 . ?
C85 C86 1.438(19) . ?
C85 H85A 0.9900 . ?
C85 H85B 0.9900 . ?
C86 H86A 0.9900 . ?
C86 H86B 0.9900 . ?
C87 C88 1.55(2) . ?
C87 H87A 0.9900 . ?
C87 H87B 0.9900 . ?
C88 H88A 0.9900 . ?
C88 H88B 0.9900 . ?
C89 C90 1.395(19) . ?
C89 H89A 0.9900 . ?
C89 H89B 0.9900 . ?
C90 H90A 0.9900 . ?
C90 H90B 0.9900 . ?
C91 C92 1.49(2) . ?
C91 H91A 0.9900 . ?
C91 H91B 0.9900 . ?
C92 H92A 0.9900 . ?
C92 H92B 0.9900 . ?
C93 C94 1.41(2) . ?
C93 H93A 0.9900 . ?
C93 H93B 0.9900 . ?
C94 H94A 0.9900 . ?
C94 H94B 0.9900 . ?
C95 C96 1.48(2) . ?
C95 H95A 0.9900 . ?
C95 H95B 0.9900 . ?
C96 H96A 0.9900 . ?
C96 H96B 0.9900 . ?
C97 C98 1.49(2) . ?
C97 H97A 0.9900 . ?
C97 H97B 0.9900 . ?
C98 H98A 0.9900 . ?
C98 H98B 0.9900 . ?
C99 C100 1.53(2) . ?
C99 H99A 0.9900 . ?
C99 H99B 0.9900 . ?
C100 H10A 0.9900 . ?
C100 H10B 0.9900 . ?
 
loop_
 _geom_angle_atom_site_label_1
 _geom_angle_atom_site_label_2
 _geom_angle_atom_site_label_3
 _geom_angle
 _geom_angle_site_symmetry_1
 _geom_angle_site_symmetry_3
 _geom_angle_publ_flag
N1 Co1 N2 85.2(6) . . ?
N1 Co1 O1 96.2(5) . . ?
N2 Co1 O1 178.3(5) . . ?
N1 Co1 O2 176.7(4) . . ?
N2 Co1 O2 95.9(5) . . ?
O1 Co1 O2 82.8(4) . . ?
N1 Co1 Na1 137.9(4) . . ?
N2 Co1 Na1 136.7(4) . . ?
O1 Co1 Na1 42.0(3) . . ?
O2 Co1 Na1 40.9(3) . . ?
N4 Co2 O6 98.2(6) . . ?
N4 Co2 N3 85.4(7) . . ?
O6 Co2 N3 175.8(5) . . ?
N4 Co2 O5 179.5(6) . . ?
O6 Co2 O5 81.5(4) . . ?
N3 Co2 O5 94.9(5) . . ?
N4 Co2 Na1 137.7(5) . . ?
O6 Co2 Na1 39.5(3) . . ?
N3 Co2 Na1 136.9(4) . . ?
O5 Co2 Na1 42.0(3) . . ?
O8 Na1 O2 84.7(3) . . ?
O8 Na1 O6 64.4(3) . . ?
O2 Na1 O6 139.8(3) . . ?
O8 Na1 O7 164.1(4) . . ?
O2 Na1 O7 84.6(3) . . ?
O6 Na1 O7 118.8(4) . . ?
O8 Na1 O1 89.1(3) . . ?
O2 Na1 O1 60.4(3) . . ?
O6 Na1 O1 137.9(4) . . ?
O7 Na1 O1 95.9(3) . . ?
O8 Na1 O4 87.2(3) . . ?
O2 Na1 O4 62.9(3) . . ?
O6 Na1 O4 89.3(3) . . ?
O7 Na1 O4 77.4(3) . . ?
O1 Na1 O4 123.3(3) . . ?
O8 Na1 O5 122.3(4) . . ?
O2 Na1 O5 140.1(4) . . ?
O6 Na1 O5 58.2(3) . . ?
O7 Na1 O5 61.8(3) . . ?
O1 Na1 O5 138.3(4) . . ?
O4 Na1 O5 87.8(4) . . ?
O8 Na1 O3 91.8(3) . . ?
O2 Na1 O3 121.8(4) . . ?
O6 Na1 O3 86.0(3) . . ?
O7 Na1 O3 103.9(3) . . ?
O1 Na1 O3 61.5(3) . . ?
O4 Na1 O3 175.1(4) . . ?
O5 Na1 O3 88.7(4) . . ?
O8 Na1 Co1 85.3(3) . . ?
O2 Na1 Co1 30.4(2) . . ?
O6 Na1 Co1 149.4(3) . . ?
O7 Na1 Co1 91.5(3) . . ?
O1 Na1 Co1 30.1(2) . . ?
O4 Na1 Co1 93.3(2) . . ?
O5 Na1 Co1 152.4(3) . . ?
O3 Na1 Co1 91.4(3) . . ?
O8 Na1 Co2 92.6(3) . . ?
O2 Na1 Co2 151.1(3) . . ?
O6 Na1 Co2 28.3(2) . . ?
O7 Na1 Co2 91.0(3) . . ?
O1 Na1 Co2 148.4(3) . . ?
O4 Na1 Co2 88.3(2) . . ?
O5 Na1 Co2 29.9(2) . . ?
O3 Na1 Co2 87.0(3) . . ?
Co1 Na1 Co2 177.25(16) . . ?
O10 Na2 O14 106.1(5) . . ?
O10 Na2 O9 67.4(5) . . ?
O14 Na2 O9 77.9(4) . . ?
O10 Na2 O11 105.4(5) . . ?
O14 Na2 O11 111.8(4) . . ?
O9 Na2 O11 169.7(5) . . ?
O10 Na2 O13 172.0(5) . . ?
O14 Na2 O13 68.1(5) . . ?
O9 Na2 O13 105.3(5) . . ?
O11 Na2 O13 82.2(4) . . ?
O10 Na2 O12 78.2(4) . . ?
O14 Na2 O12 175.6(4) . . ?
O9 Na2 O12 104.8(4) . . ?
O11 Na2 O12 65.7(4) . . ?
O13 Na2 O12 107.7(5) . . ?
O10 Na2 N6 68.7(5) . . ?
O14 Na2 N6 69.4(5) . . ?
O9 Na2 N6 113.5(5) . . ?
O11 Na2 N6 68.7(4) . . ?
O13 Na2 N6 112.9(5) . . ?
O12 Na2 N6 112.0(5) . . ?
O10 Na2 N5 112.3(5) . . ?
O14 Na2 N5 110.8(5) . . ?
O9 Na2 N5 67.7(4) . . ?
O11 Na2 N5 110.2(4) . . ?
O13 Na2 N5 66.2(4) . . ?
O12 Na2 N5 67.7(4) . . ?
N6 Na2 N5 178.8(5) . . ?
O17 Na3 O70 74.7(4) . . ?
O17 Na3 N7 74.7(4) . . ?
O17 Na3 O100 110.8(5) . . ?
O70 Na3 O100 173.5(4) . . ?
O17 Na3 N10 110.8(5) . . ?
N7 Na3 N10 173.5(4) . . ?
O17 Na3 O18 168.5(4) . . ?
O70 Na3 O18 109.0(4) . . ?
N7 Na3 O18 109.0(4) . . ?
O100 Na3 O18 66.4(4) . . ?
N10 Na3 O18 66.4(4) . . ?
O17 Na3 O90 67.5(4) . . ?
O70 Na3 O90 112.1(4) . . ?
O100 Na3 O90 73.8(4) . . ?
O18 Na3 O90 101.3(4) . . ?
O17 Na3 N9 67.5(4) . . ?
N7 Na3 N9 112.1(4) . . ?
N10 Na3 N9 73.8(4) . . ?
O18 Na3 N9 101.3(4) . . ?
O17 Na3 N8 105.6(4) . . ?
N7 Na3 N8 67.8(4) . . ?
N10 Na3 N8 113.0(4) . . ?
O18 Na3 N8 67.1(4) . . ?
N9 Na3 N8 71.1(4) . . ?
O17 Na3 O80 105.6(4) . . ?
O70 Na3 O80 67.8(4) . . ?
O100 Na3 O80 113.0(4) . . ?
O18 Na3 O80 67.1(4) . . ?
O90 Na3 O80 71.1(4) . . ?
O17 Na3 O16 106.4(4) . . ?
O70 Na3 O16 67.4(4) . . ?
N7 Na3 O16 67.4(4) . . ?
O100 Na3 O16 107.1(4) . . ?
N10 Na3 O16 107.1(4) . . ?
O18 Na3 O16 84.9(3) . . ?
O90 Na3 O16 173.4(4) . . ?
N9 Na3 O16 173.4(4) . . ?
N8 Na3 O16 113.8(4) . . ?
O80 Na3 O16 113.8(4) . . ?
O17 Na3 O15 74.2(4) . . ?
O70 Na3 O15 112.7(4) . . ?
N7 Na3 O15 112.7(4) . . ?
O100 Na3 O15 66.7(4) . . ?
N10 Na3 O15 66.7(4) . . ?
O18 Na3 O15 113.0(4) . . ?
O90 Na3 O15 108.3(4) . . ?
N9 Na3 O15 108.3(4) . . ?
N8 Na3 O15 179.4(4) . . ?
O80 Na3 O15 179.4(4) . . ?
O16 Na3 O15 66.8(3) . . ?
O22 Na4 O21 66.4(4) . . ?
O22 Na4 O23 95.4(4) . . ?
O21 Na4 O23 160.2(4) . . ?
O22 Na4 O19 114.8(4) . . ?
O21 Na4 O19 93.7(3) . . ?
O23 Na4 O19 101.5(4) . . ?
O22 Na4 O24 80.8(5) . . ?
O21 Na4 O24 103.4(4) . . ?
O23 Na4 O24 64.2(4) . . ?
O19 Na4 O24 160.7(4) . . ?
O22 Na4 O20 171.5(4) . . ?
O21 Na4 O20 105.1(3) . . ?
O23 Na4 O20 92.9(3) . . ?
O19 Na4 O20 64.6(4) . . ?
O24 Na4 O20 101.7(4) . . ?
O22 Na4 N11 66.6(4) . . ?
O21 Na4 N11 110.5(4) . . ?
O23 Na4 N11 66.1(4) . . ?
O19 Na4 N11 64.6(4) . . ?
O24 Na4 N11 116.0(4) . . ?
O20 Na4 N11 118.5(4) . . ?
O22 Na4 N12 109.9(4) . . ?
O21 Na4 N12 66.2(4) . . ?
O23 Na4 N12 116.3(4) . . ?
O19 Na4 N12 116.8(4) . . ?
O24 Na4 N12 63.9(4) . . ?
O20 Na4 N12 64.8(4) . . ?
N11 Na4 N12 176.2(5) . . ?
C1 O1 Co1 127.4(9) . . ?
C1 O1 Na1 122.6(8) . . ?
Co1 O1 Na1 107.9(4) . . ?
C20 O2 Co1 126.4(8) . . ?
C20 O2 Na1 124.9(8) . . ?
Co1 O2 Na1 108.7(4) . . ?
C2 O3 C21 118.0(12) . . ?
C2 O3 Na1 123.7(9) . . ?
C21 O3 Na1 118.3(9) . . ?
C19 O4 C22 118.1(11) . . ?
C19 O4 Na1 121.0(8) . . ?
C22 O4 Na1 118.8(8) . . ?
C23 O5 Co2 125.4(10) . . ?
C23 O5 Na1 123.7(9) . . ?
Co2 O5 Na1 108.1(5) . . ?
C42 O6 Co2 126.2(9) . . ?
C42 O6 Na1 121.5(9) . . ?
Co2 O6 Na1 112.2(4) . . ?
C24 O7 C43 117.3(11) . . ?
C24 O7 Na1 123.8(9) . . ?
C43 O7 Na1 118.3(8) . . ?
C41 O8 C44 116.9(12) . . ?
C41 O8 Na1 122.0(9) . . ?
C44 O8 Na1 120.4(8) . . ?
C47 O9 C46 109.1(15) . . ?
C47 O9 Na2 112.9(12) . . ?
C46 O9 Na2 114.7(9) . . ?
C48 O10 C49 116.0(17) . . ?
C48 O10 Na2 113.9(13) . . ?
C49 O10 Na2 113.8(10) . . ?
C52 O11 C53 111.8(13) . . ?
C52 O11 Na2 112.5(9) . . ?
C53 O11 Na2 112.9(9) . . ?
C54 O12 C55 112.6(12) . . ?
C54 O12 Na2 114.9(9) . . ?
C55 O12 Na2 111.8(9) . . ?
C58 O13 C59 116.1(14) . . ?
C58 O13 Na2 113.9(10) . . ?
C59 O13 Na2 108.9(11) . . ?
C61 O14 C60 112.3(13) . . ?
C61 O14 Na2 114.7(10) . . ?
C60 O14 Na2 115.4(10) . . ?
C70 O15 C71 112.1(11) . . ?
C70 O15 Na3 111.4(8) . . ?
C71 O15 Na3 109.0(8) . . ?
C72 O16 C73 110.6(10) . . ?
C72 O16 Na3 113.4(8) . . ?
C73 O16 Na3 111.7(8) . . ?
C77 O17 C76 113.2(13) . . ?
C77 O17 Na3 112.5(9) . . ?
C76 O17 Na3 107.8(9) . . ?
C80 O18 C81 112.1(11) . . ?
C80 O18 Na3 115.0(9) . . ?
C81 O18 Na3 114.0(8) . . ?
C84 O19 C85 115.0(12) . . ?
C84 O19 Na4 122.9(9) . . ?
C85 O19 Na4 115.9(9) . . ?
C86 O20 C87 111.2(11) . . ?
C86 O20 Na4 108.0(8) . . ?
C87 O20 Na4 115.4(9) . . ?
C91 O21 C90 116.3(12) . . ?
C91 O21 Na4 113.8(9) . . ?
C90 O21 Na4 115.1(8) . . ?
C92 O22 C93 114.6(17) . . ?
C92 O22 Na4 113.4(10) . . ?
C93 O22 Na4 110.6(11) . . ?
C97 O23 C96 110.5(13) . . ?
C97 O23 Na4 118.1(10) . . ?
C96 O23 Na4 121.3(10) . . ?
C98 O24 C99 112.8(15) . . ?
C98 O24 Na4 107.9(12) . . ?
C99 O24 Na4 116.7(10) . . ?
C7 N1 C8 119.9(12) . . ?
C7 N1 Co1 125.4(10) . . ?
C8 N1 Co1 114.6(10) . . ?
C14 N2 C13 120.5(12) . . ?
C14 N2 Co1 125.7(10) . . ?
C13 N2 Co1 113.7(10) . . ?
C29 N3 C30 122.5(15) . . ?
C29 N3 Co2 127.1(11) . . ?
C30 N3 Co2 110.4(12) . . ?
C36 N4 C35 119.7(15) . . ?
C36 N4 Co2 124.0(12) . . ?
C35 N4 Co2 116.3(12) . . ?
C56 N5 C57 112.5(14) . . ?
C56 N5 C45 110.1(14) . . ?
C57 N5 C45 114.6(14) . . ?
C56 N5 Na2 105.3(10) . . ?
C57 N5 Na2 106.2(9) . . ?
C45 N5 Na2 107.5(9) . . ?
C51 N6 C62 112.1(14) . . ?
C51 N6 C50 112.2(14) . . ?
C62 N6 C50 113.1(13) . . ?
C51 N6 Na2 106.8(10) . . ?
C62 N6 Na2 103.9(11) . . ?
C50 N6 Na2 108.0(11) . . ?
C63 N7 C74 112.4(10) . . ?
C63 N7 C75 101.1(13) . . ?
C74 N7 C75 105.8(13) . . ?
C63 N7 Na3 113.1(9) . . ?
C74 N7 Na3 112.9(9) . . ?
C75 N7 Na3 110.7(10) . . ?
C63 O70 C74 112.4(10) . . ?
C63 O70 C75 101.1(13) . . ?
C74 O70 C75 105.8(13) . . ?
C63 O70 Na3 113.1(9) . . ?
C74 O70 Na3 112.9(9) . . ?
C75 O70 Na3 110.7(10) . . ?
C79 N8 C64 108.9(12) . . ?
C79 N8 C65 94.7(11) . . ?
C64 N8 C65 118.6(13) . . ?
C79 N8 Na3 110.4(9) . . ?
C64 N8 Na3 110.1(9) . . ?
C65 N8 Na3 112.9(12) . . ?
C79 O80 C64 108.9(12) . . ?
C79 O80 C65 94.7(11) . . ?
C64 O80 C65 118.6(13) . . ?
C79 O80 Na3 110.4(9) . . ?
C64 O80 Na3 110.1(9) . . ?
C65 O80 Na3 112.9(12) . . ?
C78 N9 C66 102.5(18) . . ?
C78 N9 C67 107.3(11) . . ?
C66 N9 C67 116.1(15) . . ?
C78 N9 Na3 111.3(8) . . ?
C66 N9 Na3 111.8(13) . . ?
C67 N9 Na3 107.6(10) . . ?
C78 O90 C66 102.5(18) . . ?
C78 O90 C67 107.3(11) . . ?
C66 O90 C67 116.1(15) . . ?
C78 O90 Na3 111.3(8) . . ?
C66 O90 Na3 111.8(13) . . ?
C67 O90 Na3 107.6(10) . . ?
C82 N10 C69 113.4(12) . . ?
C82 N10 C68 112.8(11) . . ?
C69 N10 C68 102.7(13) . . ?
C82 N10 Na3 110.5(8) . . ?
C69 N10 Na3 113.0(9) . . ?
C68 N10 Na3 104.0(9) . . ?
C82 O100 C69 113.4(12) . . ?
C82 O100 C68 112.8(11) . . ?
C69 O100 C68 102.7(13) . . ?
C82 O100 Na3 110.5(8) . . ?
C69 O100 Na3 113.0(9) . . ?
C68 O100 Na3 104.0(9) . . ?
C94 N11 C95 114.4(14) . . ?
C94 N11 C83 108.5(14) . . ?
C95 N11 C83 109.8(14) . . ?
C94 N11 Na4 112.9(11) . . ?
C95 N11 Na4 104.3(10) . . ?
C83 N11 Na4 106.6(8) . . ?
C88 N12 C89 109.4(12) . . ?
C88 N12 C100 112.3(14) . . ?
C89 N12 C100 109.1(14) . . ?
C88 N12 Na4 109.0(9) . . ?
C89 N12 Na4 105.1(9) . . ?
C100 N12 Na4 111.6(9) . . ?
O1 C1 C2 119.3(14) . . ?
O1 C1 C6 123.8(13) . . ?
C2 C1 C6 116.9(14) . . ?
C3 C2 O3 126.6(16) . . ?
C3 C2 C1 121.8(17) . . ?
O3 C2 C1 111.6(15) . . ?
C2 C3 C4 122.9(16) . . ?
C2 C3 H3 118.5 . . ?
C4 C3 H3 118.5 . . ?
C5 C4 C3 116.0(15) . . ?
C5 C4 H4 122.0 . . ?
C3 C4 H4 122.0 . . ?
C4 C5 C6 125.3(16) . . ?
C4 C5 H5 117.3 . . ?
C6 C5 H5 117.3 . . ?
C5 C6 C7 122.6(16) . . ?
C5 C6 C1 116.5(14) . . ?
C7 C6 C1 120.7(14) . . ?
N1 C7 C6 125.7(14) . . ?
N1 C7 H7 117.1 . . ?
C6 C7 H7 117.1 . . ?
C13 C8 C9 119.5(14) . . ?
C13 C8 N1 112.7(13) . . ?
C9 C8 N1 127.7(14) . . ?
C10 C9 C8 121.6(15) . . ?
C10 C9 H9 119.2 . . ?
C8 C9 H9 119.2 . . ?
C9 C10 C11 118.8(14) . . ?
C9 C10 H10 120.6 . . ?
C11 C10 H10 120.6 . . ?
C12 C11 C10 121.5(13) . . ?
C12 C11 H11 119.2 . . ?
C10 C11 H11 119.2 . . ?
C11 C12 C13 118.4(14) . . ?
C11 C12 H12 120.8 . . ?
C13 C12 H12 120.8 . . ?
C8 C13 N2 113.7(12) . . ?
C8 C13 C12 120.0(14) . . ?
N2 C13 C12 126.3(14) . . ?
N2 C14 C15 127.0(13) . . ?
N2 C14 H14 116.5 . . ?
C15 C14 H14 116.5 . . ?
C16 C15 C14 123.6(13) . . ?
C16 C15 C20 115.8(14) . . ?
C14 C15 C20 120.5(14) . . ?
C17 C16 C15 124.2(14) . . ?
C17 C16 H16 117.9 . . ?
C15 C16 H16 117.9 . . ?
C16 C17 C18 120.4(14) . . ?
C16 C17 H17 119.8 . . ?
C18 C17 H17 119.8 . . ?
C17 C18 C19 118.0(13) . . ?
C17 C18 H18 121.0 . . ?
C19 C18 H18 121.0 . . ?
C18 C19 O4 122.7(13) . . ?
C18 C19 C20 123.5(14) . . ?
O4 C19 C20 113.7(12) . . ?
O2 C20 C19 117.5(12) . . ?
O2 C20 C15 124.5(13) . . ?
C19 C20 C15 118.0(14) . . ?
O3 C21 H21A 109.5 . . ?
O3 C21 H21B 109.5 . . ?
H21A C21 H21B 109.5 . . ?
O3 C21 H21C 109.5 . . ?
H21A C21 H21C 109.5 . . ?
H21B C21 H21C 109.5 . . ?
O4 C22 H22A 109.5 . . ?
O4 C22 H22B 109.5 . . ?
H22A C22 H22B 109.5 . . ?
O4 C22 H22C 109.5 . . ?
H22A C22 H22C 109.5 . . ?
H22B C22 H22C 109.5 . . ?
O5 C23 C28 124.3(15) . . ?
O5 C23 C24 115.8(14) . . ?
C28 C23 C24 119.9(15) . . ?
C25 C24 O7 124.8(15) . . ?
C25 C24 C23 120.8(15) . . ?
O7 C24 C23 114.4(14) . . ?
C24 C25 C26 120.0(15) . . ?
C24 C25 H25 120.0 . . ?
C26 C25 H25 120.0 . . ?
C27 C26 C25 117.5(15) . . ?
C27 C26 H26 121.2 . . ?
C25 C26 H26 121.2 . . ?
C26 C27 C28 123.1(15) . . ?
C26 C27 H27 118.4 . . ?
C28 C27 H27 118.4 . . ?
C23 C28 C27 118.1(16) . . ?
C23 C28 C29 124.0(15) . . ?
C27 C28 C29 117.9(17) . . ?
N3 C29 C28 121.6(15) . . ?
N3 C29 H29 119.2 . . ?
C28 C29 H29 119.2 . . ?
C35 C30 C31 121.7(17) . . ?
C35 C30 N3 115.3(15) . . ?
C31 C30 N3 123.0(18) . . ?
C32 C31 C30 119.3(19) . . ?
C32 C31 H31 120.4 . . ?
C30 C31 H31 120.4 . . ?
C31 C32 C33 119.6(18) . . ?
C31 C32 H32 120.2 . . ?
C33 C32 H32 120.2 . . ?
C34 C33 C32 118.4(18) . . ?
C34 C33 H33 120.8 . . ?
C32 C33 H33 120.8 . . ?
C35 C34 C33 122(2) . . ?
C35 C34 H34 119.0 . . ?
C33 C34 H34 119.0 . . ?
N4 C35 C30 112.5(14) . . ?
N4 C35 C34 128.6(19) . . ?
C30 C35 C34 118.8(18) . . ?
N4 C36 C37 126.0(15) . . ?
N4 C36 H36 117.0 . . ?
C37 C36 H36 117.0 . . ?
C42 C37 C36 120.9(16) . . ?
C42 C37 C38 116.8(16) . . ?
C36 C37 C38 122.3(15) . . ?
C39 C38 C37 124.0(15) . . ?
C39 C38 H38 118.0 . . ?
C37 C38 H38 118.0 . . ?
C38 C39 C40 118.9(16) . . ?
C38 C39 H39 120.5 . . ?
C40 C39 H39 120.5 . . ?
C41 C40 C39 118.9(15) . . ?
C41 C40 H40 120.5 . . ?
C39 C40 H40 120.5 . . ?
O8 C41 C40 122.1(15) . . ?
O8 C41 C42 114.0(14) . . ?
C40 C41 C42 123.8(15) . . ?
O6 C42 C41 117.9(13) . . ?
O6 C42 C37 124.6(15) . . ?
C41 C42 C37 117.5(15) . . ?
O7 C43 H43A 109.5 . . ?
O7 C43 H43B 109.5 . . ?
H43A C43 H43B 109.5 . . ?
O7 C43 H43C 109.5 . . ?
H43A C43 H43C 109.5 . . ?
H43B C43 H43C 109.5 . . ?
O8 C44 H44A 109.5 . . ?
O8 C44 H44B 109.5 . . ?
H44A C44 H44B 109.5 . . ?
O8 C44 H44C 109.5 . . ?
H44A C44 H44C 109.5 . . ?
H44B C44 H44C 109.5 . . ?
C46 C45 N5 111.6(14) . . ?
C46 C45 H45A 109.3 . . ?
N5 C45 H45A 109.3 . . ?
C46 C45 H45B 109.3 . . ?
N5 C45 H45B 109.3 . . ?
H45A C45 H45B 108.0 . . ?
C45 C46 O9 116.1(15) . . ?
C45 C46 H46A 108.3 . . ?
O9 C46 H46A 108.3 . . ?
C45 C46 H46B 108.3 . . ?
O9 C46 H46B 108.3 . . ?
H46A C46 H46B 107.4 . . ?
C48 C47 O9 105.4(16) . . ?
C48 C47 H47A 110.7 . . ?
O9 C47 H47A 110.7 . . ?
C48 C47 H47B 110.7 . . ?
O9 C47 H47B 110.7 . . ?
H47A C47 H47B 108.8 . . ?
O10 C48 C47 112.9(19) . . ?
O10 C48 H48A 109.0 . . ?
C47 C48 H48A 109.0 . . ?
O10 C48 H48B 109.0 . . ?
C47 C48 H48B 109.0 . . ?
H48A C48 H48B 107.8 . . ?
O10 C49 C50 115.2(17) . . ?
O10 C49 H49A 108.5 . . ?
C50 C49 H49A 108.5 . . ?
O10 C49 H49B 108.5 . . ?
C50 C49 H49B 108.5 . . ?
H49A C49 H49B 107.5 . . ?
C49 C50 N6 109.3(14) . . ?
C49 C50 H50A 109.8 . . ?
N6 C50 H50A 109.8 . . ?
C49 C50 H50B 109.8 . . ?
N6 C50 H50B 109.8 . . ?
H50A C50 H50B 108.3 . . ?
N6 C51 C52 114.6(14) . . ?
N6 C51 H51A 108.6 . . ?
C52 C51 H51A 108.6 . . ?
N6 C51 H51B 108.6 . . ?
C52 C51 H51B 108.6 . . ?
H51A C51 H51B 107.6 . . ?
O11 C52 C51 113.3(13) . . ?
O11 C52 H52A 108.9 . . ?
C51 C52 H52A 108.9 . . ?
O11 C52 H52B 108.9 . . ?
C51 C52 H52B 108.9 . . ?
H52A C52 H52B 107.7 . . ?
O11 C53 C54 105.9(15) . . ?
O11 C53 H53A 110.6 . . ?
C54 C53 H53A 110.6 . . ?
O11 C53 H53B 110.6 . . ?
C54 C53 H53B 110.6 . . ?
H53A C53 H53B 108.7 . . ?
O12 C54 C53 103.4(13) . . ?
O12 C54 H54A 111.1 . . ?
C53 C54 H54A 111.1 . . ?
O12 C54 H54B 111.1 . . ?
C53 C54 H54B 111.1 . . ?
H54A C54 H54B 109.0 . . ?
O12 C55 C56 114.7(15) . . ?
O12 C55 H55A 108.6 . . ?
C56 C55 H55A 108.6 . . ?
O12 C55 H55B 108.6 . . ?
C56 C55 H55B 108.6 . . ?
H55A C55 H55B 107.6 . . ?
C55 C56 N5 115.1(15) . . ?
C55 C56 H56A 108.5 . . ?
N5 C56 H56A 108.5 . . ?
C55 C56 H56B 108.5 . . ?
N5 C56 H56B 108.5 . . ?
H56A C56 H56B 107.5 . . ?
C58 C57 N5 113.6(13) . . ?
C58 C57 H57A 108.9 . . ?
N5 C57 H57A 108.9 . . ?
C58 C57 H57B 108.9 . . ?
N5 C57 H57B 108.9 . . ?
H57A C57 H57B 107.7 . . ?
O13 C58 C57 113.2(14) . . ?
O13 C58 H58A 108.9 . . ?
C57 C58 H58A 108.9 . . ?
O13 C58 H58B 108.9 . . ?
C57 C58 H58B 108.9 . . ?
H58A C58 H58B 107.8 . . ?
O13 C59 C60 111.1(16) . . ?
O13 C59 H59A 109.4 . . ?
C60 C59 H59A 109.4 . . ?
O13 C59 H59B 109.4 . . ?
C60 C59 H59B 109.4 . . ?
H59A C59 H59B 108.0 . . ?
O14 C60 C59 105.5(16) . . ?
O14 C60 H60A 110.7 . . ?
C59 C60 H60A 110.7 . . ?
O14 C60 H60B 110.7 . . ?
C59 C60 H60B 110.7 . . ?
H60A C60 H60B 108.8 . . ?
O14 C61 C62 109.5(13) . . ?
O14 C61 H61A 109.8 . . ?
C62 C61 H61A 109.8 . . ?
O14 C61 H61B 109.8 . . ?
C62 C61 H61B 109.8 . . ?
H61A C61 H61B 108.2 . . ?
N6 C62 C61 112.9(15) . . ?
N6 C62 H62A 109.0 . . ?
C61 C62 H62A 109.0 . . ?
N6 C62 H62B 109.0 . . ?
C61 C62 H62B 109.0 . . ?
H62A C62 H62B 107.8 . . ?
O70 C63 C64 111.1(12) . . ?
N7 C63 C64 111.1(12) . . ?
N7 C63 H63A 109.4 . . ?
C64 C63 H63A 109.4 . . ?
N7 C63 H63B 109.4 . . ?
C64 C63 H63B 109.4 . . ?
H63A C63 H63B 108.0 . . ?
C63 C64 N8 109.0(13) . . ?
C63 C64 O80 109.0(13) . . ?
C63 C64 H64A 109.9 . . ?
N8 C64 H64A 109.9 . . ?
C63 C64 H64B 109.9 . . ?
N8 C64 H64B 109.9 . . ?
H64A C64 H64B 108.3 . . ?
O80 C65 C66 116.3(19) . . ?
N8 C65 C66 116.3(19) . . ?
N8 C65 H65A 108.2 . . ?
C66 C65 H65A 108.2 . . ?
N8 C65 H65B 108.2 . . ?
C66 C65 H65B 108.2 . . ?
H65A C65 H65B 107.4 . . ?
O90 C66 C65 118(2) . . ?
N9 C66 C65 118(2) . . ?
N9 C66 H66A 107.7 . . ?
C65 C66 H66A 107.7 . . ?
N9 C66 H66B 107.7 . . ?
C65 C66 H66B 107.7 . . ?
H66A C66 H66B 107.1 . . ?
O90 C67 C68 109.8(14) . . ?
N9 C67 C68 109.8(14) . . ?
N9 C67 H67A 109.7 . . ?
C68 C67 H67A 109.7 . . ?
N9 C67 H67B 109.7 . . ?
C68 C67 H67B 109.7 . . ?
H67A C67 H67B 108.2 . . ?
O100 C68 C67 119.8(15) . . ?
N10 C68 C67 119.8(15) . . ?
N10 C68 H68A 107.4 . . ?
C67 C68 H68A 107.4 . . ?
N10 C68 H68B 107.4 . . ?
C67 C68 H68B 107.4 . . ?
H68A C68 H68B 106.9 . . ?
O100 C69 C70 112.0(13) . . ?
N10 C69 C70 112.0(13) . . ?
N10 C69 H69A 109.2 . . ?
C70 C69 H69A 109.2 . . ?
N10 C69 H69B 109.2 . . ?
C70 C69 H69B 109.2 . . ?
H69A C69 H69B 107.9 . . ?
O15 C70 C69 109.4(12) . . ?
O15 C70 H70A 109.8 . . ?
C69 C70 H70A 109.8 . . ?
O15 C70 H70B 109.8 . . ?
C69 C70 H70B 109.8 . . ?
H70A C70 H70B 108.2 . . ?
C72 C71 O15 111.4(12) . . ?
C72 C71 H71A 109.4 . . ?
O15 C71 H71A 109.4 . . ?
C72 C71 H71B 109.4 . . ?
O15 C71 H71B 109.4 . . ?
H71A C71 H71B 108.0 . . ?
O16 C72 C71 113.9(13) . . ?
O16 C72 H72A 108.8 . . ?
C71 C72 H72A 108.8 . . ?
O16 C72 H72B 108.8 . . ?
C71 C72 H72B 108.8 . . ?
H72A C72 H72B 107.7 . . ?
O16 C73 C74 109.0(12) . . ?
O16 C73 H73A 109.9 . . ?
C74 C73 H73A 109.9 . . ?
O16 C73 H73B 109.9 . . ?
C74 C73 H73B 109.9 . . ?
H73A C73 H73B 108.3 . . ?
C73 C74 N7 109.7(12) . . ?
C73 C74 O70 109.7(12) . . ?
C73 C74 H74A 109.7 . . ?
N7 C74 H74A 109.7 . . ?
C73 C74 H74B 109.7 . . ?
N7 C74 H74B 109.7 . . ?
H74A C74 H74B 108.2 . . ?
C76 C75 N7 105.8(19) . . ?
C76 C75 O70 105.8(19) . . ?
C76 C75 H75A 110.6 . . ?
N7 C75 H75A 110.6 . . ?
C76 C75 H75B 110.6 . . ?
N7 C75 H75B 110.6 . . ?
H75A C75 H75B 108.7 . . ?
C76 C75 H76A 113(3) . 3_556 ?
N7 C75 H76A 117(2) . 3_556 ?
H75B C75 H76A 100.0 . 3_556 ?
C75 C76 O17 116(2) . . ?
C75 C76 H76A 108.3 . . ?
O17 C76 H76A 108.3 . . ?
C75 C76 H76B 108.3 . . ?
O17 C76 H76B 108.3 . . ?
H76A C76 H76B 107.4 . . ?
C75 C76 H75A 101(3) . 3_556 ?
O17 C76 H75A 112.9(18) . 3_556 ?
H76B C76 H75A 110.5 . 3_556 ?
C78 C77 O17 110.2(13) . . ?
C78 C77 H77A 109.6 . . ?
O17 C77 H77A 109.6 . . ?
C78 C77 H77B 109.6 . . ?
O17 C77 H77B 109.6 . . ?
H77A C77 H77B 108.1 . . ?
C77 C78 N9 110.1(13) . . ?
C77 C78 O90 110.1(13) . . ?
C77 C78 H78A 109.6 . . ?
N9 C78 H78A 109.6 . . ?
C77 C78 H78B 109.6 . . ?
N9 C78 H78B 109.6 . . ?
H78A C78 H78B 108.2 . . ?
C80 C79 N8 116.6(14) . . ?
C80 C79 O80 116.6(14) . . ?
C80 C79 H79A 108.1 . . ?
N8 C79 H79A 108.1 . . ?
C80 C79 H79B 108.1 . . ?
N8 C79 H79B 108.1 . . ?
H79A C79 H79B 107.3 . . ?
C79 C80 O18 110.4(15) . . ?
C79 C80 H80A 109.6 . . ?
O18 C80 H80A 109.6 . . ?
C79 C80 H80B 109.6 . . ?
O18 C80 H80B 109.6 . . ?
H80A C80 H80B 108.1 . . ?
C82 C81 O18 107.7(11) . . ?
C82 C81 H81A 110.2 . . ?
O18 C81 H81A 110.2 . . ?
C82 C81 H81B 110.2 . . ?
O18 C81 H81B 110.2 . . ?
H81A C81 H81B 108.5 . . ?
C81 C82 N10 111.6(13) . . ?
C81 C82 O100 111.6(13) . . ?
C81 C82 H82A 109.3 . . ?
N10 C82 H82A 109.3 . . ?
C81 C82 H82B 109.3 . . ?
N10 C82 H82B 109.3 . . ?
H82A C82 H82B 108.0 . . ?
C84 C83 N11 112.8(14) . . ?
C84 C83 H83A 109.0 . . ?
N11 C83 H83A 109.0 . . ?
C84 C83 H83B 109.0 . . ?
N11 C83 H83B 109.0 . . ?
H83A C83 H83B 107.8 . . ?
O19 C84 C83 108.6(13) . . ?
O19 C84 H84A 110.0 . . ?
C83 C84 H84A 110.0 . . ?
O19 C84 H84B 110.0 . . ?
C83 C84 H84B 110.0 . . ?
H84A C84 H84B 108.3 . . ?
C86 C85 O19 110.0(13) . . ?
C86 C85 H85A 109.7 . . ?
O19 C85 H85A 109.7 . . ?
C86 C85 H85B 109.7 . . ?
O19 C85 H85B 109.7 . . ?
H85A C85 H85B 108.2 . . ?
O20 C86 C85 109.2(13) . . ?
O20 C86 H86A 109.8 . . ?
C85 C86 H86A 109.8 . . ?
O20 C86 H86B 109.8 . . ?
C85 C86 H86B 109.8 . . ?
H86A C86 H86B 108.3 . . ?
O20 C87 C88 111.9(12) . . ?
O20 C87 H87A 109.2 . . ?
C88 C87 H87A 109.2 . . ?
O20 C87 H87B 109.2 . . ?
C88 C87 H87B 109.2 . . ?
H87A C87 H87B 107.9 . . ?
N12 C88 C87 109.5(12) . . ?
N12 C88 H88A 109.8 . . ?
C87 C88 H88A 109.8 . . ?
N12 C88 H88B 109.8 . . ?
C87 C88 H88B 109.8 . . ?
H88A C88 H88B 108.2 . . ?
C90 C89 N12 112.8(14) . . ?
C90 C89 H89A 109.0 . . ?
N12 C89 H89A 109.0 . . ?
C90 C89 H89B 109.0 . . ?
N12 C89 H89B 109.0 . . ?
H89A C89 H89B 107.8 . . ?
C89 C90 O21 114.0(14) . . ?
C89 C90 H90A 108.7 . . ?
O21 C90 H90A 108.7 . . ?
C89 C90 H90B 108.7 . . ?
O21 C90 H90B 108.7 . . ?
H90A C90 H90B 107.6 . . ?
O21 C91 C92 110.2(14) . . ?
O21 C91 H91A 109.6 . . ?
C92 C91 H91A 109.6 . . ?
O21 C91 H91B 109.6 . . ?
C92 C91 H91B 109.6 . . ?
H91A C91 H91B 108.1 . . ?
O22 C92 C91 105.4(15) . . ?
O22 C92 H92A 110.7 . . ?
C91 C92 H92A 110.7 . . ?
O22 C92 H92B 110.7 . . ?
C91 C92 H92B 110.7 . . ?
H92A C92 H92B 108.8 . . ?
C94 C93 O22 113.7(17) . . ?
C94 C93 H93A 108.8 . . ?
O22 C93 H93A 108.8 . . ?
C94 C93 H93B 108.8 . . ?
O22 C93 H93B 108.8 . . ?
H93A C93 H93B 107.7 . . ?
N11 C94 C93 116.0(17) . . ?
N11 C94 H94A 108.3 . . ?
C93 C94 H94A 108.3 . . ?
N11 C94 H94B 108.3 . . ?
C93 C94 H94B 108.3 . . ?
H94A C94 H94B 107.4 . . ?
N11 C95 C96 114.4(16) . . ?
N11 C95 H95A 108.7 . . ?
C96 C95 H95A 108.7 . . ?
N11 C95 H95B 108.7 . . ?
C96 C95 H95B 108.7 . . ?
H95A C95 H95B 107.6 . . ?
O23 C96 C95 107.0(15) . . ?
O23 C96 H96A 110.3 . . ?
C95 C96 H96A 110.3 . . ?
O23 C96 H96B 110.3 . . ?
C95 C96 H96B 110.3 . . ?
H96A C96 H96B 108.6 . . ?
O23 C97 C98 110.6(17) . . ?
O23 C97 H97A 109.5 . . ?
C98 C97 H97A 109.5 . . ?
O23 C97 H97B 109.5 . . ?
C98 C97 H97B 109.5 . . ?
H97A C97 H97B 108.1 . . ?
O24 C98 C97 103.8(18) . . ?
O24 C98 H98A 111.0 . . ?
C97 C98 H98A 111.0 . . ?
O24 C98 H98B 111.0 . . ?
C97 C98 H98B 111.0 . . ?
H98A C98 H98B 109.0 . . ?
O24 C99 C100 113.3(14) . . ?
O24 C99 H99A 108.9 . . ?
C100 C99 H99A 108.9 . . ?
O24 C99 H99B 108.9 . . ?
C100 C99 H99B 108.9 . . ?
H99A C99 H99B 107.7 . . ?
N12 C100 C99 109.8(15) . . ?
N12 C100 H10A 109.7 . . ?
C99 C100 H10A 109.7 . . ?
N12 C100 H10B 109.7 . . ?
C99 C100 H10B 109.7 . . ?
H10A C100 H10B 108.2 . . ?
 
loop_
 _geom_torsion_atom_site_label_1
 _geom_torsion_atom_site_label_2
 _geom_torsion_atom_site_label_3
 _geom_torsion_atom_site_label_4
 _geom_torsion
 _geom_torsion_site_symmetry_1
 _geom_torsion_site_symmetry_2
 _geom_torsion_site_symmetry_3
 _geom_torsion_site_symmetry_4
 _geom_torsion_publ_flag
N1 Co1 O1 C1 10.5(10) . . . . ?
O2 Co1 O1 C1 -166.3(10) . . . . ?
Na1 Co1 O1 C1 -163.5(12) . . . . ?
N1 Co1 O1 Na1 174.0(4) . . . . ?
O2 Co1 O1 Na1 -2.8(4) . . . . ?
N2 Co1 O2 C20 -0.5(10) . . . . ?
O1 Co1 O2 C20 -179.5(10) . . . . ?
Na1 Co1 O2 C20 177.7(11) . . . . ?
N2 Co1 O2 Na1 -178.2(4) . . . . ?
O1 Co1 O2 Na1 2.8(4) . . . . ?
O6 Co2 O5 C23 -161.5(11) . . . . ?
N3 Co2 O5 C23 16.3(12) . . . . ?
Na1 Co2 O5 C23 -161.4(14) . . . . ?
O6 Co2 O5 Na1 -0.1(4) . . . . ?
N3 Co2 O5 Na1 177.7(5) . . . . ?
N4 Co2 O6 C42 -2.0(11) . . . . ?
O5 Co2 O6 C42 178.4(11) . . . . ?
Na1 Co2 O6 C42 178.2(12) . . . . ?
N4 Co2 O6 Na1 179.8(5) . . . . ?
O5 Co2 O6 Na1 0.1(5) . . . . ?
N2 Co1 N1 C7 176.6(11) . . . . ?
O1 Co1 N1 C7 -4.4(11) . . . . ?
Na1 Co1 N1 C7 1.5(12) . . . . ?
N2 Co1 N1 C8 -1.1(8) . . . . ?
O1 Co1 N1 C8 177.9(8) . . . . ?
Na1 Co1 N1 C8 -176.1(6) . . . . ?
N1 Co1 N2 C14 -177.2(10) . . . . ?
O2 Co1 N2 C14 -0.4(10) . . . . ?
Na1 Co1 N2 C14 -2.1(12) . . . . ?
N1 Co1 N2 C13 -0.9(8) . . . . ?
O2 Co1 N2 C13 175.9(8) . . . . ?
Na1 Co1 N2 C13 174.3(6) . . . . ?
N4 Co2 N3 C29 175.8(14) . . . . ?
O5 Co2 N3 C29 -4.5(14) . . . . ?
Na1 Co2 N3 C29 -2.3(16) . . . . ?
N4 Co2 N3 C30 -3.1(8) . . . . ?
O5 Co2 N3 C30 176.6(8) . . . . ?
Na1 Co2 N3 C30 178.8(6) . . . . ?
O6 Co2 N4 C36 0.9(12) . . . . ?
N3 Co2 N4 C36 -177.0(12) . . . . ?
Na1 Co2 N4 C36 1.1(15) . . . . ?
O6 Co2 N4 C35 179.8(9) . . . . ?
N3 Co2 N4 C35 2.0(10) . . . . ?
Na1 Co2 N4 C35 -179.9(7) . . . . ?
Co1 O1 C1 C2 171.0(9) . . . . ?
Na1 O1 C1 C2 9.7(15) . . . . ?
Co1 O1 C1 C6 -10.5(18) . . . . ?
Na1 O1 C1 C6 -171.9(9) . . . . ?
C21 O3 C2 C3 -4(2) . . . . ?
Na1 O3 C2 C3 172.4(12) . . . . ?
C21 O3 C2 C1 173.8(11) . . . . ?
Na1 O3 C2 C1 -9.7(15) . . . . ?
O1 C1 C2 C3 178.0(13) . . . . ?
C6 C1 C2 C3 -1(2) . . . . ?
O1 C1 C2 O3 0.0(17) . . . . ?
C6 C1 C2 O3 -178.6(11) . . . . ?
O3 C2 C3 C4 -175.3(13) . . . . ?
C1 C2 C3 C4 7(2) . . . . ?
C2 C3 C4 C5 -8(2) . . . . ?
C3 C4 C5 C6 4(2) . . . . ?
C4 C5 C6 C7 177.7(14) . . . . ?
C4 C5 C6 C1 2(2) . . . . ?
O1 C1 C6 C5 177.7(12) . . . . ?
C2 C1 C6 C5 -3.8(19) . . . . ?
O1 C1 C6 C7 2(2) . . . . ?
C2 C1 C6 C7 -179.4(12) . . . . ?
C8 N1 C7 C6 176.0(12) . . . . ?
Co1 N1 C7 C6 -1.5(19) . . . . ?
C5 C6 C7 N1 -171.2(14) . . . . ?
C1 C6 C7 N1 4(2) . . . . ?
C7 N1 C8 C13 -175.0(11) . . . . ?
Co1 N1 C8 C13 2.8(13) . . . . ?
C7 N1 C8 C9 2.7(19) . . . . ?
Co1 N1 C8 C9 -179.5(11) . . . . ?
C13 C8 C9 C10 1.1(19) . . . . ?
N1 C8 C9 C10 -176.4(12) . . . . ?
C8 C9 C10 C11 3.2(19) . . . . ?
C9 C10 C11 C12 -6.0(19) . . . . ?
C10 C11 C12 C13 4.2(18) . . . . ?
C9 C8 C13 N2 178.6(11) . . . . ?
N1 C8 C13 N2 -3.5(15) . . . . ?
C9 C8 C13 C12 -2.9(18) . . . . ?
N1 C8 C13 C12 175.0(10) . . . . ?
C14 N2 C13 C8 179.2(11) . . . . ?
Co1 N2 C13 C8 2.7(13) . . . . ?
C14 N2 C13 C12 0.8(18) . . . . ?
Co1 N2 C13 C12 -175.7(9) . . . . ?
C11 C12 C13 C8 0.2(18) . . . . ?
C11 C12 C13 N2 178.6(11) . . . . ?
C13 N2 C14 C15 -174.9(11) . . . . ?
Co1 N2 C14 C15 1.2(18) . . . . ?
N2 C14 C15 C16 -178.6(12) . . . . ?
N2 C14 C15 C20 -1.2(19) . . . . ?
C14 C15 C16 C17 179.9(12) . . . . ?
C20 C15 C16 C17 2.4(19) . . . . ?
C15 C16 C17 C18 -2(2) . . . . ?
C16 C17 C18 C19 0.8(18) . . . . ?
C17 C18 C19 O4 177.5(11) . . . . ?
C17 C18 C19 C20 0.5(19) . . . . ?
C22 O4 C19 C18 16.6(17) . . . . ?
Na1 O4 C19 C18 -179.7(9) . . . . ?
C22 O4 C19 C20 -166.1(11) . . . . ?
Na1 O4 C19 C20 -2.5(14) . . . . ?
Co1 O2 C20 C19 179.4(8) . . . . ?
Na1 O2 C20 C19 -3.3(16) . . . . ?
Co1 O2 C20 C15 0.7(18) . . . . ?
Na1 O2 C20 C15 178.0(9) . . . . ?
C18 C19 C20 O2 -179.2(11) . . . . ?
O4 C19 C20 O2 3.6(17) . . . . ?
C18 C19 C20 C15 -0.4(19) . . . . ?
O4 C19 C20 C15 -177.7(10) . . . . ?
C16 C15 C20 O2 177.7(12) . . . . ?
C14 C15 C20 O2 0.1(19) . . . . ?
C16 C15 C20 C19 -1.0(17) . . . . ?
C14 C15 C20 C19 -178.6(11) . . . . ?
Co2 O5 C23 C28 -17(2) . . . . ?
Na1 O5 C23 C28 -175.6(11) . . . . ?
Co2 O5 C23 C24 162.5(9) . . . . ?
Na1 O5 C23 C24 3.8(17) . . . . ?
C43 O7 C24 C25 2.1(19) . . . . ?
Na1 O7 C24 C25 173.1(10) . . . . ?
C43 O7 C24 C23 -178.7(11) . . . . ?
Na1 O7 C24 C23 -7.7(15) . . . . ?
O5 C23 C24 C25 -178.5(12) . . . . ?
C28 C23 C24 C25 1(2) . . . . ?
O5 C23 C24 O7 2.3(17) . . . . ?
C28 C23 C24 O7 -178.2(12) . . . . ?
O7 C24 C25 C26 177.3(13) . . . . ?
C23 C24 C25 C26 -2(2) . . . . ?
C24 C25 C26 C27 -3(2) . . . . ?
C25 C26 C27 C28 9(3) . . . . ?
O5 C23 C28 C27 -176.0(14) . . . . ?
C24 C23 C28 C27 5(2) . . . . ?
O5 C23 C28 C29 2(2) . . . . ?
C24 C23 C28 C29 -177.4(14) . . . . ?
C26 C27 C28 C23 -10(2) . . . . ?
C26 C27 C28 C29 172.1(16) . . . . ?
C30 N3 C29 C28 172.1(13) . . . . ?
Co2 N3 C29 C28 -7(2) . . . . ?
C23 C28 C29 N3 10(3) . . . . ?
C27 C28 C29 N3 -171.5(15) . . . . ?
C29 N3 C30 C35 -175.1(15) . . . . ?
Co2 N3 C30 C35 3.9(15) . . . . ?
C29 N3 C30 C31 4(2) . . . . ?
Co2 N3 C30 C31 -177.0(11) . . . . ?
C35 C30 C31 C32 -1(2) . . . . ?
N3 C30 C31 C32 -179.6(14) . . . . ?
C30 C31 C32 C33 2(3) . . . . ?
C31 C32 C33 C34 -5(3) . . . . ?
C32 C33 C34 C35 7(3) . . . . ?
C36 N4 C35 C30 178.8(13) . . . . ?
Co2 N4 C35 C30 -0.2(16) . . . . ?
C36 N4 C35 C34 -5(2) . . . . ?
Co2 N4 C35 C34 176.1(12) . . . . ?
C31 C30 C35 N4 178.5(12) . . . . ?
N3 C30 C35 N4 -2.4(18) . . . . ?
C31 C30 C35 C34 2(2) . . . . ?
N3 C30 C35 C34 -179.2(12) . . . . ?
C33 C34 C35 N4 179.0(15) . . . . ?
C33 C34 C35 C30 -5(2) . . . . ?
C35 N4 C36 C37 -179.2(13) . . . . ?
Co2 N4 C36 C37 0(2) . . . . ?
N4 C36 C37 C42 0(2) . . . . ?
N4 C36 C37 C38 178.4(14) . . . . ?
C42 C37 C38 C39 0(2) . . . . ?
C36 C37 C38 C39 -178.5(15) . . . . ?
C37 C38 C39 C40 2(2) . . . . ?
C38 C39 C40 C41 -2(2) . . . . ?
C44 O8 C41 C40 -12.4(18) . . . . ?
Na1 O8 C41 C40 176.6(10) . . . . ?
C44 O8 C41 C42 166.6(12) . . . . ?
Na1 O8 C41 C42 -4.4(15) . . . . ?
C39 C40 C41 O8 178.6(12) . . . . ?
C39 C40 C41 C42 0(2) . . . . ?
Co2 O6 C42 C41 -175.7(9) . . . . ?
Na1 O6 C42 C41 2.4(16) . . . . ?
Co2 O6 C42 C37 2.5(19) . . . . ?
Na1 O6 C42 C37 -179.4(10) . . . . ?
O8 C41 C42 O6 1.2(18) . . . . ?
C40 C41 C42 O6 -179.8(12) . . . . ?
O8 C41 C42 C37 -177.1(11) . . . . ?
C40 C41 C42 C37 2(2) . . . . ?
C36 C37 C42 O6 -1(2) . . . . ?
C38 C37 C42 O6 -179.7(13) . . . . ?
C36 C37 C42 C41 176.7(13) . . . . ?
C38 C37 C42 C41 -1.5(19) . . . . ?
C56 N5 C45 C46 148.8(17) . . . . ?
C57 N5 C45 C46 -83.2(19) . . . . ?
Na2 N5 C45 C46 34.6(19) . . . . ?
N5 C45 C46 O9 -56(2) . . . . ?
C47 O9 C46 C45 -80.6(19) . . . . ?
Na2 O9 C46 C45 47.2(18) . . . . ?
C46 O9 C47 C48 175.0(15) . . . . ?
Na2 O9 C47 C48 46.3(18) . . . . ?
C49 O10 C48 C47 177.9(18) . . . . ?
Na2 O10 C48 C47 43(2) . . . . ?
O9 C47 C48 O10 -59(2) . . . . ?
C48 O10 C49 C50 -85.0(19) . . . . ?
Na2 O10 C49 C50 50.1(18) . . . . ?
O10 C49 C50 N6 -58(2) . . . . ?
C51 N6 C50 C49 -82(2) . . . . ?
C62 N6 C50 C49 149.9(17) . . . . ?
Na2 N6 C50 C49 35.5(18) . . . . ?
C62 N6 C51 C52 -81.0(18) . . . . ?
C50 N6 C51 C52 150.4(15) . . . . ?
Na2 N6 C51 C52 32.2(16) . . . . ?
C53 O11 C52 C51 -78.6(15) . . . . ?
Na2 O11 C52 C51 49.7(15) . . . . ?
N6 C51 C52 O11 -57.6(18) . . . . ?
C52 O11 C53 C54 -176.6(11) . . . . ?
Na2 O11 C53 C54 55.3(13) . . . . ?
C55 O12 C54 C53 176.4(13) . . . . ?
Na2 O12 C54 C53 46.8(15) . . . . ?
O11 C53 C54 O12 -66.4(15) . . . . ?
C54 O12 C55 C56 -82.2(18) . . . . ?
Na2 O12 C55 C56 48.9(16) . . . . ?
O12 C55 C56 N5 -61(2) . . . . ?
C57 N5 C56 C55 151.8(16) . . . . ?
C45 N5 C56 C55 -79.1(19) . . . . ?
Na2 N5 C56 C55 36.5(18) . . . . ?
C56 N5 C57 C58 -81.4(18) . . . . ?
C45 N5 C57 C58 151.9(15) . . . . ?
Na2 N5 C57 C58 33.4(16) . . . . ?
C59 O13 C58 C57 -73.7(19) . . . . ?
Na2 O13 C58 C57 54.0(17) . . . . ?
N5 C57 C58 O13 -60(2) . . . . ?
C58 O13 C59 C60 -179.3(15) . . . . ?
Na2 O13 C59 C60 50.6(18) . . . . ?
C61 O14 C60 C59 177.5(15) . . . . ?
Na2 O14 C60 C59 43.4(18) . . . . ?
O13 C59 C60 O14 -63(2) . . . . ?
C60 O14 C61 C62 -84.5(17) . . . . ?
Na2 O14 C61 C62 49.9(15) . . . . ?
C51 N6 C62 C61 156.3(14) . . . . ?
C50 N6 C62 C61 -75.6(19) . . . . ?
Na2 N6 C62 C61 41.3(15) . . . . ?
O14 C61 C62 N6 -63.9(17) . . . . ?
C74 O70 C63 C64 -84.5(16) . . . . ?
C75 O70 C63 C64 163.1(14) . . . . ?
Na3 O70 C63 C64 44.8(14) . . . . ?
C74 N7 C63 C64 -84.5(16) . . . . ?
C75 N7 C63 C64 163.1(14) . . . . ?
Na3 N7 C63 C64 44.8(14) . . . . ?
N7 C63 C64 N8 -62.1(16) . . . . ?
O70 C63 C64 O80 -62.1(16) . . . . ?
C79 N8 C64 C63 167.7(11) . . . . ?
C65 N8 C64 C63 -85.8(18) . . . . ?
Na3 N8 C64 C63 46.4(13) . . . . ?
C79 O80 C64 C63 167.7(11) . . . . ?
C65 O80 C64 C63 -85.8(18) . . . . ?
Na3 O80 C64 C63 46.4(13) . . . . ?
C79 O80 C65 C66 -90(2) . . . . ?
C64 O80 C65 C66 156(2) . . . . ?
Na3 O80 C65 C66 25(2) . . . . ?
C79 N8 C65 C66 -90(2) . . . . ?
C64 N8 C65 C66 156(2) . . . . ?
Na3 N8 C65 C66 25(2) . . . . ?
C78 O90 C66 C65 -90(3) . . . . ?
C67 O90 C66 C65 153(2) . . . . ?
Na3 O90 C66 C65 29(3) . . . . ?
C78 N9 C66 C65 -90(3) . . . . ?
C67 N9 C66 C65 153(2) . . . . ?
Na3 N9 C66 C65 29(3) . . . . ?
O80 C65 C66 O90 -38(4) . . . . ?
N8 C65 C66 N9 -38(4) . . . . ?
C78 O90 C67 C68 162.7(13) . . . . ?
C66 O90 C67 C68 -83(2) . . . . ?
Na3 O90 C67 C68 42.8(16) . . . . ?
C78 N9 C67 C68 162.7(13) . . . . ?
C66 N9 C67 C68 -83(2) . . . . ?
Na3 N9 C67 C68 42.8(16) . . . . ?
C82 O100 C68 C67 160.6(14) . . . . ?
C69 O100 C68 C67 -77.1(18) . . . . ?
Na3 O100 C68 C67 40.9(18) . . . . ?
C82 N10 C68 C67 160.6(14) . . . . ?
C69 N10 C68 C67 -77.1(18) . . . . ?
Na3 N10 C68 C67 40.9(18) . . . . ?
O90 C67 C68 O100 -62(2) . . . . ?
N9 C67 C68 N10 -62(2) . . . . ?
C82 O100 C69 C70 -78.7(15) . . . . ?
C68 O100 C69 C70 159.4(13) . . . . ?
Na3 O100 C69 C70 48.0(15) . . . . ?
C82 N10 C69 C70 -78.7(15) . . . . ?
C68 N10 C69 C70 159.4(13) . . . . ?
Na3 N10 C69 C70 48.0(15) . . . . ?
C71 O15 C70 C69 163.5(12) . . . . ?
Na3 O15 C70 C69 40.9(14) . . . . ?
O100 C69 C70 O15 -60.9(17) . . . . ?
N10 C69 C70 O15 -60.9(17) . . . . ?
C70 O15 C71 C72 -80.7(15) . . . . ?
Na3 O15 C71 C72 43.2(13) . . . . ?
C73 O16 C72 C71 -83.0(14) . . . . ?
Na3 O16 C72 C71 43.3(14) . . . . ?
O15 C71 C72 O16 -60.0(16) . . . . ?
C72 O16 C73 C74 173.9(12) . . . . ?
Na3 O16 C73 C74 46.7(13) . . . . ?
O16 C73 C74 N7 -61.8(15) . . . . ?
O16 C73 C74 O70 -61.8(15) . . . . ?
C63 N7 C74 C73 174.7(12) . . . . ?
C75 N7 C74 C73 -75.9(16) . . . . ?
Na3 N7 C74 C73 45.4(14) . . . . ?
C63 O70 C74 C73 174.7(12) . . . . ?
C75 O70 C74 C73 -75.9(16) . . . . ?
Na3 O70 C74 C73 45.4(14) . . . . ?
C63 N7 C75 C76 -81(2) . . . . ?
C74 N7 C75 C76 162.2(18) . . . . ?
Na3 N7 C75 C76 40(2) . . . . ?
C63 O70 C75 C76 -81(2) . . . . ?
C74 O70 C75 C76 162.2(18) . . . . ?
Na3 O70 C75 C76 40(2) . . . . ?
N7 C75 C76 O17 -58(2) . . . . ?
O70 C75 C76 O17 -58(2) . . . . ?
C77 O17 C76 C75 171.9(17) . . . . ?
Na3 O17 C76 C75 47(2) . . . . ?
C76 O17 C77 C78 -75.1(16) . . . . ?
Na3 O17 C77 C78 47.4(15) . . . . ?
O17 C77 C78 N9 -61.4(16) . . . . ?
O17 C77 C78 O90 -61.4(16) . . . . ?
C66 N9 C78 C77 163.3(15) . . . . ?
C67 N9 C78 C77 -73.9(16) . . . . ?
Na3 N9 C78 C77 43.6(14) . . . . ?
C66 O90 C78 C77 163.3(15) . . . . ?
C67 O90 C78 C77 -73.9(16) . . . . ?
Na3 O90 C78 C77 43.6(14) . . . . ?
C64 N8 C79 C80 -78.8(17) . . . . ?
C65 N8 C79 C80 158.9(16) . . . . ?
Na3 N8 C79 C80 42.3(17) . . . . ?
C64 O80 C79 C80 -78.8(17) . . . . ?
C65 O80 C79 C80 158.9(16) . . . . ?
Na3 O80 C79 C80 42.3(17) . . . . ?
N8 C79 C80 O18 -53.6(19) . . . . ?
O80 C79 C80 O18 -53.6(19) . . . . ?
C81 O18 C80 C79 -95.6(16) . . . . ?
Na3 O18 C80 C79 36.6(16) . . . . ?
C80 O18 C81 C82 172.6(13) . . . . ?
Na3 O18 C81 C82 39.8(15) . . . . ?
O18 C81 C82 N10 -62.1(15) . . . . ?
O18 C81 C82 O100 -62.1(15) . . . . ?
C69 N10 C82 C81 -179.3(12) . . . . ?
C68 N10 C82 C81 -63.2(16) . . . . ?
Na3 N10 C82 C81 52.7(13) . . . . ?
C69 O100 C82 C81 -179.3(12) . . . . ?
C68 O100 C82 C81 -63.2(16) . . . . ?
Na3 O100 C82 C81 52.7(13) . . . . ?
C94 N11 C83 C84 175.0(14) . . . . ?
C95 N11 C83 C84 -59.4(17) . . . . ?
Na4 N11 C83 C84 53.1(14) . . . . ?
C85 O19 C84 C83 176.4(13) . . . . ?
Na4 O19 C84 C83 25.4(17) . . . . ?
N11 C83 C84 O19 -52.8(17) . . . . ?
C84 O19 C85 C86 -176.4(13) . . . . ?
Na4 O19 C85 C86 -23.3(15) . . . . ?
C87 O20 C86 C85 170.2(12) . . . . ?
Na4 O20 C86 C85 -62.3(13) . . . . ?
O19 C85 C86 O20 57.7(16) . . . . ?
C86 O20 C87 C88 73.4(15) . . . . ?
Na4 O20 C87 C88 -50.0(13) . . . . ?
C89 N12 C88 C87 -156.3(13) . . . . ?
C100 N12 C88 C87 82.3(16) . . . . ?
Na4 N12 C88 C87 -41.9(13) . . . . ?
O20 C87 C88 N12 63.3(15) . . . . ?
C88 N12 C89 C90 78.5(17) . . . . ?
C100 N12 C89 C90 -158.3(14) . . . . ?
Na4 N12 C89 C90 -38.5(16) . . . . ?
N12 C89 C90 O21 61.6(17) . . . . ?
C91 O21 C90 C89 86.1(17) . . . . ?
Na4 O21 C90 C89 -50.6(15) . . . . ?
C90 O21 C91 C92 -174.9(14) . . . . ?
Na4 O21 C91 C92 -37.7(19) . . . . ?
C93 O22 C92 C91 177.4(15) . . . . ?
Na4 O22 C92 C91 -54.3(18) . . . . ?
O21 C91 C92 O22 60.7(19) . . . . ?
C92 O22 C93 C94 78(2) . . . . ?
Na4 O22 C93 C94 -52(2) . . . . ?
C95 N11 C94 C93 105(2) . . . . ?
C83 N11 C94 C93 -131.6(19) . . . . ?
Na4 N11 C94 C93 -14(2) . . . . ?
O22 C93 C94 N11 43(3) . . . . ?
C94 N11 C95 C96 -68.3(19) . . . . ?
C83 N11 C95 C96 169.4(14) . . . . ?
Na4 N11 C95 C96 55.5(15) . . . . ?
C97 O23 C96 C95 170.8(15) . . . . ?
Na4 O23 C96 C95 26.1(17) . . . . ?
N11 C95 C96 O23 -56.5(19) . . . . ?
C96 O23 C97 C98 -174.4(17) . . . . ?
Na4 O23 C97 C98 -28(2) . . . . ?
C99 O24 C98 C97 167.6(15) . . . . ?
Na4 O24 C98 C97 -62.0(18) . . . . ?
O23 C97 C98 O24 60(2) . . . . ?
C98 O24 C99 C100 75(2) . . . . ?
Na4 O24 C99 C100 -51.2(18) . . . . ?
C88 N12 C100 C99 -156.4(15) . . . . ?
C89 N12 C100 C99 82.1(17) . . . . ?
Na4 N12 C100 C99 -33.6(18) . . . . ?
O24 C99 C100 N12 57(2) . . . . ?
 
_refine_diff_density_max    0.894
_refine_diff_density_min   -0.788
_refine_diff_density_rms    0.085

_shelx_res_file
;
TITL ja665 in P2(1)/c
    shelx.res
    created by SHELXL-2016/6 at 15:34:05 on 18-May-2017
CELL 1.54184 22.2322 12.779 46.9541 90 103.289 90
ZERR 4 0.0016 0.0007 0.0034 0 0.007 0
LATT 1
SYMM -X,0.5+Y,0.5-Z
SFAC C H N O Na Co
UNIT 392 576 40 104 16 8
L.S.   10
ACTA
FMAP   2
PLAN   20
BOND   $H
CONF
TEMP  -133.00
EQIV $1 -x, -y, 1-z
FREE C75 C76_$1
FREE C76 C75_$1
FREE C75 H75A_$1
FREE C75 H75B_$1
FREE C75 H76A_$1
FREE C75 H76B_$1
FREE C76 H76A_$1
FREE C75 H76B_$1
FREE C76 H75A_$1
FREE C75 H75B_$1
FREE H75A H76A_$1
FREE H75B H76A_$1
FREE H75A H76B_$1
FREE H75B H76B_$1
FREE H75A H75A_$1
FREE H75B H75A_$1
FREE H75A H75B_$1
FREE H75B H75B_$1
FREE C66 Na3
FREE C66 C78
FREE C68 Na3
EADP C67 C68
ISOR 0.005 C66 C67 C68 C93
DELU 0.005 C65 C66 C67 C68 C67 N9 C67 O90 C68 N10 C76 O17 C85 C86 C79 C80
DELU 0.005 C49 C50 C5 C6 C32 C33 C37 C42 C30 C31 C53 C54 C57 C58 C59 C60
DFIX 1.50 0.005 C65 C66 C67 C68
DFIX 1.47 0.005 N8 C65 N9 C66 N9 C67 N10 C68
DFIX 1.90 0.005 H63A H76B H65B H79B
EXYZ    N7   O70
EADP    N7   O70
EXYZ    N8   O80
EADP    N8   O80
EXYZ    N9   O90
EADP    N9   O90
EXYZ    N10   O100
EADP    N10   O100
OMIT  1 1 9
OMIT  0 1 9
OMIT -6   1   9
OMIT -5   0   2
ABIN
WGHT    0.185600   37.599598
FVAR       0.56949
CO1   6    0.318527    0.360548    0.409374    11.00000    0.05232    0.04457 =
         0.05613    0.00313    0.00628   -0.00328
CO2   6    0.007057    0.182858    0.370575    11.00000    0.06280    0.06541 =
         0.05549   -0.00335    0.00567   -0.01163
NA1   5    0.162315    0.277586    0.390825    11.00000    0.06152    0.05221 =
         0.06425   -0.00052    0.00715   -0.00465
NA2   5    0.141683   -0.209638    0.776029    11.00000    0.09711    0.08173 =
         0.05212    0.00009    0.00177    0.00174
NA3   5   -0.172129    0.155695    0.473552    11.00000    0.05881    0.06610 =
         0.06630   -0.00025    0.01007    0.00445
NA4   5   -0.439813   -0.910322    0.577857    11.00000    0.06631    0.04914 =
         0.08620    0.00466    0.00938    0.00594
O1    4    0.259061    0.325722    0.375719    11.00000    0.05130    0.06917 =
         0.05824    0.00280    0.00306   -0.00108
O2    4    0.252539    0.336165    0.427809    11.00000    0.04404    0.05683 =
         0.05432    0.00103    0.01166   -0.00453
O3    4    0.165861    0.255502    0.337749    11.00000    0.05061    0.08806 =
         0.06059    0.00705   -0.00244   -0.01817
O4    4    0.150630    0.290149    0.442511    11.00000    0.04591    0.08839 =
         0.06451   -0.01279    0.00692   -0.01688
O5    4    0.048101    0.311891    0.374476    11.00000    0.08368    0.05646 =
         0.11073    0.00276   -0.00881   -0.00008
O6    4    0.086429    0.134720    0.382187    11.00000    0.07759    0.04983 =
         0.06508    0.00050    0.01683   -0.01502
O7    4    0.125398    0.458245    0.393422    11.00000    0.08683    0.05867 =
         0.08052   -0.00006    0.01607   -0.01366
O8    4    0.203933    0.103532    0.402896    11.00000    0.05040    0.05562 =
         0.10100    0.00428    0.00366    0.00017
O9    4    0.103681   -0.076122    0.738181    11.00000    0.11769    0.12301 =
         0.05590    0.01633    0.02130    0.01682
O10   4    0.075197   -0.283186    0.732094    11.00000    0.13255    0.14298 =
         0.05305   -0.00959    0.00187    0.01201
O11   4    0.184489   -0.362541    0.806807    11.00000    0.07374    0.09956 =
         0.06361    0.00291   -0.00348   -0.01235
O12   4    0.217757   -0.319255    0.755587    11.00000    0.09403    0.10448 =
         0.07417    0.00749    0.02998    0.01989
O13   4    0.201830   -0.110871    0.818988    11.00000    0.12318    0.08666 =
         0.08581   -0.00234    0.02304   -0.01812
O14   4    0.075057   -0.103347    0.799002    11.00000    0.10255    0.11699 =
         0.07163    0.00111    0.02707    0.00017
O15   4   -0.225869    0.001430    0.437571    11.00000    0.07996    0.08436 =
         0.11130    0.00465   -0.01049   -0.01323
O16   4   -0.217323    0.008292    0.500287    11.00000    0.06958    0.05584 =
         0.08564   -0.00453    0.00213    0.00203
O17   4   -0.088736    0.075264    0.454257    11.00000    0.10721    0.07523 =
         0.14463    0.01043    0.06810   -0.00227
O18   4   -0.250061    0.273260    0.490420    11.00000    0.07743    0.06540 =
         0.10693    0.01832    0.02426    0.02632
O19   4   -0.386512   -0.986056    0.540452    11.00000    0.07529    0.09096 =
         0.07435    0.00385    0.00741    0.01057
O20   4   -0.485750   -1.084910    0.553986    11.00000    0.06645    0.05478 =
         0.08151    0.01475    0.00982    0.01840
O21   4   -0.356733   -0.962543    0.619693    11.00000    0.08871    0.06972 =
         0.07144    0.00849    0.00721    0.01030
O22   4   -0.386144   -0.761552    0.605790    11.00000    0.15824    0.06188 =
         0.10760    0.00924    0.03828   -0.02218
O23   4   -0.522488   -0.803734    0.546471    11.00000    0.07561    0.07069 =
         0.09579    0.01830    0.00244   -0.00795
O24   4   -0.526663   -0.846326    0.602254    11.00000    0.08796    0.09339 =
         0.12982    0.01088    0.02566    0.02494
N1    3    0.382419    0.375838    0.391295    11.00000    0.05616    0.04183 =
         0.05490    0.00817    0.00476    0.01919
N2    3    0.375237    0.396914    0.442861    11.00000    0.04793    0.03715 =
         0.05904   -0.00742   -0.00543    0.00173
N3    3   -0.071478    0.240231    0.360436    11.00000    0.07673    0.09059 =
         0.03581   -0.01410    0.01285   -0.01235
N4    3   -0.032487    0.056624    0.366588    11.00000    0.08458    0.08720 =
         0.04686   -0.00564    0.01718   -0.02086
N5    3    0.237409   -0.089265    0.763665    11.00000    0.08060    0.09687 =
         0.09554    0.01550    0.04087    0.01278
N6    3    0.049473   -0.329123    0.789225    11.00000    0.09304    0.11451 =
         0.07381   -0.01275   -0.00797    0.01263
PART 1
N7    3   -0.095870    0.088521    0.517528    10.50000    0.09909    0.10344 =
         0.06095   -0.01654    0.02976   -0.01830
PART 2
O70   4   -0.095870    0.088521    0.517528    10.50000    0.09909    0.10344 =
         0.06095   -0.01654    0.02976   -0.01830
PART 1
N8    3   -0.120716    0.303992    0.507388    10.50000    0.08758    0.12053 =
         0.05560   -0.01029    0.03155   -0.02042
PART 2
O80   4   -0.120716    0.303992    0.507388    10.50000    0.08758    0.12053 =
         0.05560   -0.01029    0.03155   -0.02042
PART 1
N9    3   -0.123042    0.284334    0.443946    10.50000    0.10651    0.07319 =
         0.08739    0.01872    0.05122    0.01021
PART 2
O90   4   -0.123042    0.284334    0.443946    10.50000    0.10651    0.07319 =
         0.08739    0.01872    0.05122    0.01021
PART 1
N10   3   -0.259013    0.219410    0.432026    10.50000    0.08303    0.06667 =
         0.07641   -0.00626   -0.00357    0.02036
PART 2
O100  4   -0.259013    0.219410    0.432026    10.50000    0.08303    0.06667 =
         0.07641   -0.00626   -0.00357    0.02036
PART 0
N11   3   -0.398285   -0.770666    0.544736    11.00000    0.10327    0.04400 =
         0.10307    0.03557    0.03377    0.02158
N12   3   -0.478350   -1.055269    0.616701    11.00000    0.07770    0.07099 =
         0.12164    0.01454    0.03796    0.02015
C1    1    0.268297    0.303002    0.349723    11.00000    0.05806    0.05974 =
         0.05276    0.00423    0.01399    0.02945
C2    1    0.218487    0.263837    0.327798    11.00000    0.06454    0.06259 =
         0.07727    0.00391   -0.00647   -0.00109
C3    1    0.224759    0.242499    0.300899    11.00000    0.09878    0.08207 =
         0.04259    0.00369   -0.00166   -0.00491
AFIX  43
H3    2    0.188987    0.224043    0.286403    11.00000   -1.20000
AFIX   0
C4    1    0.281341    0.246015    0.293065    11.00000    0.08026    0.07160 =
         0.06724   -0.01496   -0.00525    0.00910
AFIX  43
H4    2    0.286165    0.221838    0.274587    11.00000   -1.20000
AFIX   0
C5    1    0.329608    0.286349    0.313549    11.00000    0.08798    0.10572 =
         0.06955    0.00656    0.03533    0.01690
AFIX  43
H5    2    0.368115    0.293352    0.308207    11.00000   -1.20000
AFIX   0
C6    1    0.326957    0.317968    0.341565    11.00000    0.05527    0.08885 =
         0.05190    0.00059   -0.00371    0.01229
C7    1    0.379639    0.356052    0.362341    11.00000    0.07187    0.07382 =
         0.09250    0.02255    0.02567   -0.00206
AFIX  43
H7    2    0.415996    0.368820    0.355499    11.00000   -1.20000
AFIX   0
C8    1    0.437806    0.406686    0.409611    11.00000    0.05045    0.05753 =
         0.05274   -0.00292    0.00923    0.00507
C9    1    0.493655    0.425172    0.402199    11.00000    0.07899    0.04810 =
         0.08843    0.01945    0.02405    0.00735
AFIX  43
H9    2    0.495812    0.420522    0.382265    11.00000   -1.20000
AFIX   0
C10   1    0.545981    0.450060    0.422976    11.00000    0.04622    0.05419 =
         0.08779    0.01145    0.01046    0.00563
AFIX  43
H10   2    0.583469    0.466037    0.417463    11.00000   -1.20000
AFIX   0
C11   1    0.543077    0.451453    0.452356    11.00000    0.05117    0.04155 =
         0.08269   -0.00008   -0.00221   -0.02757
AFIX  43
H11   2    0.579928    0.462002    0.466985    11.00000   -1.20000
AFIX   0
C12   1    0.488102    0.437908    0.460623    11.00000    0.05492    0.03883 =
         0.08495   -0.01102    0.00733   -0.00891
AFIX  43
H12   2    0.486203    0.443630    0.480570    11.00000   -1.20000
AFIX   0
C13   1    0.434071    0.415085    0.438535    11.00000    0.03769    0.02819 =
         0.08919   -0.01423    0.00350   -0.00687
C14   1    0.364880    0.401000    0.469236    11.00000    0.07458    0.03149 =
         0.05462   -0.00843   -0.00043   -0.00813
AFIX  43
H14   2    0.398490    0.422544    0.484518    11.00000   -1.20000
AFIX   0
C15   1    0.308358    0.376474    0.477464    11.00000    0.06021    0.03266 =
         0.06263   -0.01146   -0.00633   -0.01127
C16   1    0.300497    0.385006    0.506310    11.00000    0.06803    0.06194 =
         0.05481   -0.00922   -0.00136   -0.00263
AFIX  43
H16   2    0.334706    0.408215    0.521031    11.00000   -1.20000
AFIX   0
C17   1    0.246814    0.362031    0.514460    11.00000    0.06729    0.04952 =
         0.06229   -0.01007    0.00617    0.01311
AFIX  43
H17   2    0.245168    0.367027    0.534453    11.00000   -1.20000
AFIX   0
C18   1    0.195132    0.331707    0.493895    11.00000    0.05103    0.04178 =
         0.05711   -0.00316    0.01634   -0.00312
AFIX  43
H18   2    0.157461    0.316442    0.499322    11.00000   -1.20000
AFIX   0
C19   1    0.199683    0.324113    0.465054    11.00000    0.06525    0.05940 =
         0.05105    0.02138    0.01281    0.00600
C20   1    0.254552    0.345009    0.455754    11.00000    0.03839    0.07395 =
         0.05075    0.01646    0.00938   -0.00800
C21   1    0.109732    0.226874    0.317084    11.00000    0.07989    0.10708 =
         0.09210   -0.00011    0.02037   -0.02685
AFIX  33
H21A  2    0.075636    0.223716    0.327085    11.00000   -1.50000
H21B  2    0.100381    0.279213    0.301432    11.00000   -1.50000
H21C  2    0.115000    0.158223    0.308678    11.00000   -1.50000
AFIX   0
C22   1    0.090927    0.289577    0.447755    11.00000    0.04824    0.08898 =
         0.09054    0.02812    0.01002   -0.01067
AFIX  33
H22A  2    0.061398    0.264275    0.430292    11.00000   -1.50000
H22B  2    0.090082    0.243329    0.464308    11.00000   -1.50000
H22C  2    0.079643    0.360727    0.452325    11.00000   -1.50000
AFIX   0
C23   1    0.022492    0.403225    0.376958    11.00000    0.07431    0.06151 =
         0.05006   -0.00448    0.00054    0.01013
C24   1    0.063749    0.485558    0.387928    11.00000    0.05179    0.06645 =
         0.04987    0.01498    0.00349    0.00534
C25   1    0.041987    0.583900    0.392065    11.00000    0.13235    0.06004 =
         0.05113    0.00657    0.03891    0.00055
AFIX  43
H25   2    0.070108    0.638129    0.399986    11.00000   -1.20000
AFIX   0
C26   1   -0.021506    0.603943    0.384608    11.00000    0.06648    0.07681 =
         0.11607   -0.01431    0.01661    0.01639
AFIX  43
H26   2   -0.037579    0.670354    0.388132    11.00000   -1.20000
AFIX   0
C27   1   -0.059949    0.523691    0.371943    11.00000    0.04700    0.12749 =
         0.11127    0.01325    0.03043    0.02981
AFIX  43
H27   2   -0.102402    0.538816    0.364208    11.00000   -1.20000
AFIX   0
C28   1   -0.039439    0.421312    0.369951    11.00000    0.06735    0.06865 =
         0.06709   -0.00458    0.00795    0.01180
C29   1   -0.086108    0.340206    0.359536    11.00000    0.06292    0.10876 =
         0.13535    0.02843    0.03877    0.00656
AFIX  43
H29   2   -0.127858    0.360360    0.351968    11.00000   -1.20000
AFIX   0
C30   1   -0.117243    0.158911    0.353814    11.00000    0.06927    0.11830 =
         0.03730   -0.00491    0.01035   -0.03466
C31   1   -0.181222    0.179446    0.344088    11.00000    0.07837    0.13763 =
         0.06902   -0.02341   -0.00845   -0.02322
AFIX  43
H31   2   -0.195879    0.249430    0.341512    11.00000   -1.20000
AFIX   0
C32   1   -0.222188    0.096477    0.338372    11.00000    0.07082    0.16042 =
         0.09628   -0.02830   -0.00737   -0.03461
AFIX  43
H32   2   -0.265114    0.108978    0.331149    11.00000   -1.20000
AFIX   0
C33   1   -0.199621   -0.007855    0.343384    11.00000    0.09370    0.14810 =
         0.08071   -0.00943    0.00702   -0.04899
AFIX  43
H33   2   -0.227311   -0.065483    0.341121    11.00000   -1.20000
AFIX   0
C34   1   -0.136077   -0.023237    0.351668    11.00000    0.10056    0.14412 =
         0.04456    0.00135    0.00803   -0.05768
AFIX  43
H34   2   -0.120386   -0.092659    0.353068    11.00000   -1.20000
AFIX   0
C35   1   -0.094972    0.059523    0.357937    11.00000    0.06480    0.09434 =
         0.05508   -0.01637    0.02240   -0.04402
C36   1   -0.003529   -0.035692    0.372078    11.00000    0.10114    0.09055 =
         0.05787    0.01297    0.00053   -0.04414
AFIX  43
H36   2   -0.028678   -0.096630    0.369347    11.00000   -1.20000
AFIX   0
C37   1    0.061986   -0.051009    0.381704    11.00000    0.09680    0.06901 =
         0.05341   -0.00798    0.02448   -0.02848
C38   1    0.089005   -0.152981    0.387794    11.00000    0.12086    0.04343 =
         0.07608    0.00977   -0.00761   -0.02267
AFIX  43
H38   2    0.062190   -0.211847    0.384832    11.00000   -1.20000
AFIX   0
C39   1    0.151419   -0.170605    0.397667    11.00000    0.13091    0.05676 =
         0.06817   -0.00425    0.00195   -0.01055
AFIX  43
H39   2    0.166996   -0.239911    0.400794    11.00000   -1.20000
AFIX   0
C40   1    0.191508   -0.084901    0.403017    11.00000    0.09321    0.06882 =
         0.06574   -0.01121    0.01239    0.00124
AFIX  43
H40   2    0.234650   -0.094935    0.410296    11.00000   -1.20000
AFIX   0
C41   1    0.167285    0.014946    0.397530    11.00000    0.09451    0.06666 =
         0.04707   -0.01271    0.03079   -0.01913
C42   1    0.103481    0.036224    0.386532    11.00000    0.08190    0.05066 =
         0.06356   -0.01201    0.01946   -0.01578
C43   1    0.170116    0.538120    0.405292    11.00000    0.08334    0.08706 =
         0.08670   -0.02924    0.01154   -0.01573
AFIX  33
H43A  2    0.211906    0.509173    0.408192    11.00000   -1.50000
H43B  2    0.165573    0.597157    0.391642    11.00000   -1.50000
H43C  2    0.163211    0.562227    0.424097    11.00000   -1.50000
AFIX   0
C44   1    0.265671    0.090090    0.419831    11.00000    0.08123    0.07533 =
         0.09587   -0.01378    0.00808    0.01093
AFIX  33
H44A  2    0.286961    0.157779    0.422160    11.00000   -1.50000
H44B  2    0.264568    0.062074    0.439133    11.00000   -1.50000
H44C  2    0.287805    0.041204    0.409807    11.00000   -1.50000
AFIX   0

C45   1    0.210203   -0.022854    0.737201    11.00000    0.08030    0.13843 =
         0.11884    0.05376    0.02297    0.01372
AFIX  23
H45A  2    0.236194    0.040093    0.737269    11.00000   -1.20000
H45B  2    0.210371   -0.063114    0.719205    11.00000   -1.20000
AFIX   0
C46   1    0.147895    0.008886    0.736910    11.00000    0.11808    0.10389 =
         0.10904    0.02594    0.05715    0.02983
AFIX  23
H46A  2    0.131894    0.049969    0.718885    11.00000   -1.20000
H46B  2    0.149168    0.056086    0.753758    11.00000   -1.20000
AFIX   0
C47   1    0.082285   -0.120586    0.709106    11.00000    0.11472    0.22617 =
         0.06230    0.05171    0.03347    0.04558
AFIX  23
H47A  2    0.058144   -0.068452    0.695548    11.00000   -1.20000
H47B  2    0.117687   -0.143907    0.701205    11.00000   -1.20000
AFIX   0
C48   1    0.043804   -0.208801    0.712806    11.00000    0.13232    0.19808 =
         0.04580    0.03661   -0.00921    0.03922
AFIX  23
H48A  2    0.008081   -0.183090    0.720081    11.00000   -1.20000
H48B  2    0.027582   -0.242091    0.693530    11.00000   -1.20000
AFIX   0
C49   1    0.038678   -0.373001    0.737731    11.00000    0.12915    0.13975 =
         0.07751   -0.02499   -0.01527    0.03286
AFIX  23
H49A  2    0.066767   -0.433468    0.743278    11.00000   -1.20000
H49B  2    0.008792   -0.391390    0.719317    11.00000   -1.20000
AFIX   0
C50   1    0.004361   -0.357021    0.760753    11.00000    0.06159    0.15095 =
         0.11971   -0.00067   -0.00654    0.01381
AFIX  23
H50A  2   -0.018303   -0.421685    0.763362    11.00000   -1.20000
H50B  2   -0.026100   -0.299909    0.755003    11.00000   -1.20000
AFIX   0
C51   1    0.078737   -0.420874    0.804564    11.00000    0.07932    0.09164 =
         0.09993    0.01428    0.00974    0.01364
AFIX  23
H51A  2    0.080862   -0.475958    0.790002    11.00000   -1.20000
H51B  2    0.052392   -0.447573    0.817329    11.00000   -1.20000
AFIX   0
C52   1    0.142794   -0.402445    0.822990    11.00000    0.07318    0.07591 =
         0.09486   -0.00061    0.00487    0.00682
AFIX  23
H52A  2    0.140349   -0.352456    0.838792    11.00000   -1.20000
H52B  2    0.159285   -0.469249    0.832285    11.00000   -1.20000
AFIX   0
C53   1    0.206595   -0.442721    0.790732    11.00000    0.11726    0.10176 =
         0.05935   -0.00400   -0.00448    0.02812
AFIX  23
H53A  2    0.172168   -0.473003    0.775806    11.00000   -1.20000
H53B  2    0.226523   -0.499325    0.803987    11.00000   -1.20000
AFIX   0
C54   1    0.254415   -0.388854    0.775863    11.00000    0.10110    0.11480 =
         0.07601    0.02078    0.00235    0.06144
AFIX  23
H54A  2    0.286040   -0.350440    0.790390    11.00000   -1.20000
H54B  2    0.275221   -0.440820    0.765775    11.00000   -1.20000
AFIX   0
C55   1    0.253844   -0.256021    0.740542    11.00000    0.08817    0.11911 =
         0.08571    0.02015    0.04030    0.01743
AFIX  23
H55A  2    0.227098   -0.232861    0.721728    11.00000   -1.20000
H55B  2    0.287142   -0.299826    0.735983    11.00000   -1.20000
AFIX   0
C56   1    0.281429   -0.164950    0.756499    11.00000    0.07928    0.10161 =
         0.16671    0.02212    0.02892   -0.00401
AFIX  23
H56A  2    0.306952   -0.128842    0.744798    11.00000   -1.20000
H56B  2    0.309454   -0.188392    0.774947    11.00000   -1.20000
AFIX   0
C57   1    0.263581   -0.029624    0.790407    11.00000    0.10627    0.07224 =
         0.09036   -0.01669    0.02988   -0.01397
AFIX  23
H57A  2    0.307024   -0.011744    0.790650    11.00000   -1.20000
H57B  2    0.240395    0.036738    0.789932    11.00000   -1.20000
AFIX   0
C58   1    0.261865   -0.084821    0.816842    11.00000    0.08726    0.11365 =
         0.06928   -0.01190   -0.00762   -0.01622
AFIX  23
H58A  2    0.286508   -0.149769    0.817747    11.00000   -1.20000
H58B  2    0.281367   -0.040926    0.833833    11.00000   -1.20000
AFIX   0
C59   1    0.164873   -0.026811    0.825348    11.00000    0.17439    0.09795 =
         0.10882   -0.02660    0.07082   -0.02704
AFIX  23
H59A  2    0.160300    0.026743    0.809762    11.00000   -1.20000
H59B  2    0.185774    0.006243    0.844081    11.00000   -1.20000
AFIX   0
C60   1    0.103241   -0.063966    0.827420    11.00000    0.12646    0.09688 =
         0.11602   -0.06275    0.03207    0.00193
AFIX  23
H60A  2    0.106884   -0.119872    0.842316    11.00000   -1.20000
H60B  2    0.078578   -0.005816    0.832794    11.00000   -1.20000
AFIX   0
C61   1    0.015312   -0.146905    0.797746    11.00000    0.09328    0.09955 =
         0.08591    0.01917    0.02306    0.03201
AFIX  23
H61A  2   -0.009799   -0.144079    0.777405    11.00000   -1.20000
H61B  2   -0.006119   -0.105714    0.810292    11.00000   -1.20000
AFIX   0
C62   1    0.022177   -0.260814    0.808293    11.00000    0.09288    0.16324 =
         0.05388   -0.00510   -0.00904    0.01441
AFIX  23
H62A  2    0.048584   -0.262844    0.828376    11.00000   -1.20000
H62B  2   -0.019017   -0.288367    0.809099    11.00000   -1.20000
AFIX   0

C63   1   -0.056547    0.168500    0.532920    11.00000    0.06335    0.06632 =
         0.07301   -0.01279    0.01463   -0.01196
AFIX  23
H63A  2   -0.024767    0.186593    0.522032    11.00000   -1.20000
H63B  2   -0.035132    0.142052    0.552437    11.00000   -1.20000
AFIX   0
C64   1   -0.091869    0.262202    0.536414    11.00000    0.07285    0.09283 =
         0.10321   -0.03645    0.01519   -0.02626
AFIX  23
H64A  2   -0.064130    0.315408    0.547888    11.00000   -1.20000
H64B  2   -0.124101    0.244554    0.547079    11.00000   -1.20000
AFIX   0
C65   1   -0.084448    0.375650    0.493174    10.50000    0.10890    0.03658 =
         0.11286    0.00806    0.04440    0.00127
AFIX  23
H65A  2   -0.040544    0.354095    0.498858    10.50000   -1.20000
H65B  2   -0.087275    0.446860    0.501067    10.50000   -1.20000
AFIX   0
C66   1   -0.103081    0.381421    0.460363    10.50000    0.11543    0.10804 =
         0.11485   -0.00283    0.02939   -0.00017
AFIX  23
H66A  2   -0.137201    0.432710    0.455070    10.50000   -1.20000
H66B  2   -0.067655    0.410046    0.453385    10.50000   -1.20000
AFIX   0
C67   1   -0.166065    0.297065    0.415151    11.00000    0.12225    0.13036 =
         0.12228    0.00533    0.02272   -0.00601
AFIX  23
H67A  2   -0.162892    0.235897    0.402641    11.00000   -1.20000
H67B  2   -0.154990    0.360495    0.405380    11.00000   -1.20000
AFIX   0
C68   1   -0.231057    0.306664    0.418973    11.00000    0.12225    0.13036 =
         0.12228    0.00533    0.02272   -0.00601
AFIX  23
H68A  2   -0.232692    0.369484    0.431111    11.00000   -1.20000
H68B  2   -0.258027    0.320753    0.399443    11.00000   -1.20000
AFIX   0
C69   1   -0.274554    0.145804    0.408196    11.00000    0.09293    0.09861 =
         0.09198    0.00575    0.01103   -0.00146
AFIX  23
H69A  2   -0.241510    0.145969    0.397209    11.00000   -1.20000
H69B  2   -0.313429    0.168111    0.394649    11.00000   -1.20000
AFIX   0
C70   1   -0.282445    0.035349    0.418853    11.00000    0.05425    0.09323 =
         0.05926   -0.00485   -0.01217    0.02099
AFIX  23
H70A  2   -0.315809    0.034221    0.429647    11.00000   -1.20000
H70B  2   -0.294136   -0.012572    0.401915    11.00000   -1.20000
AFIX   0
C71   1   -0.234742   -0.091638    0.455488    11.00000    0.07716    0.06919 =
         0.07900    0.00127    0.01863   -0.00135
AFIX  23
H71A  2   -0.264454   -0.140426    0.443267    11.00000   -1.20000
H71B  2   -0.194871   -0.128764    0.462040    11.00000   -1.20000
AFIX   0
C72   1   -0.257598   -0.061209    0.480807    11.00000    0.10368    0.04963 =
         0.08441    0.01149    0.02270   -0.02522
AFIX  23
H72A  2   -0.298305   -0.026908    0.474027    11.00000   -1.20000
H72B  2   -0.263897   -0.124999    0.491728    11.00000   -1.20000
AFIX   0
C73   1   -0.169458   -0.049456    0.519790    11.00000    0.07211    0.07536 =
         0.07062   -0.01463    0.01466   -0.00311
AFIX  23
H73A  2   -0.147914   -0.095510    0.508391    11.00000   -1.20000
H73B  2   -0.187754   -0.093853    0.532881    11.00000   -1.20000
AFIX   0
C74   1   -0.125224    0.024736    0.537270    11.00000    0.10373    0.08420 =
         0.07365   -0.01920    0.03077   -0.01663
AFIX  23
H74A  2   -0.093027   -0.014123    0.551385    11.00000   -1.20000
H74B  2   -0.146966    0.071300    0.548453    11.00000   -1.20000
AFIX   0
C75   1   -0.043409    0.008674    0.507411    10.50000    0.06765    0.03942 =
         0.06965    0.00753    0.00880    0.01103
AFIX  23
H75A  2   -0.005605    0.003056    0.523304    10.50000   -1.20000
H75B  2   -0.060869   -0.062232    0.502789    10.50000   -1.20000
AFIX   0
C76   1   -0.029579    0.056093    0.481910    10.50000    0.12418    0.04212 =
         0.09939   -0.01691    0.07492   -0.00462
AFIX  23
H76A  2    0.000734    0.011291    0.475171    10.50000   -1.20000
H76B  2   -0.009454    0.124422    0.487668    10.50000   -1.20000
AFIX   0
C77   1   -0.073313    0.136452    0.430734    11.00000    0.09542    0.08706 =
         0.10100   -0.02784    0.04922   -0.00686
AFIX  23
H77A  2   -0.034375    0.110013    0.426556    11.00000   -1.20000
H77B  2   -0.106475    0.128939    0.412743    11.00000   -1.20000
AFIX   0
C78   1   -0.066319    0.244287    0.438886    11.00000    0.07762    0.07681 =
         0.06581    0.00875    0.01434   -0.00507
AFIX  23
H78A  2   -0.054336    0.284876    0.423102    11.00000   -1.20000
H78B  2   -0.033136    0.251822    0.456869    11.00000   -1.20000
AFIX   0
C79   1   -0.166607    0.383028    0.510474    11.00000    0.16612    0.05522 =
         0.07112    0.01469    0.02851   -0.00697
AFIX  23
H79A  2   -0.148411    0.427494    0.527547    11.00000   -1.20000
H79B  2   -0.174235    0.428420    0.492923    11.00000   -1.20000
AFIX   0
C80   1   -0.223292    0.346099    0.513995    11.00000    0.15184    0.07750 =
         0.06546   -0.02053    0.02618   -0.00793
AFIX  23
H80A  2   -0.251833    0.405665    0.513850    11.00000   -1.20000
H80B  2   -0.217621    0.310143    0.533105    11.00000   -1.20000
AFIX   0
C81   1   -0.294011    0.325207    0.466404    11.00000    0.09274    0.04248 =
         0.09646   -0.00002    0.00988    0.02960
AFIX  23
H81A  2   -0.330965    0.348319    0.473106    11.00000   -1.20000
H81B  2   -0.274566    0.387379    0.459692    11.00000   -1.20000
AFIX   0
C82   1   -0.311242    0.251434    0.443059    11.00000    0.09752    0.05067 =
         0.07174    0.00085    0.00298    0.00456
AFIX  23
H82A  2   -0.342681    0.283280    0.427006    11.00000   -1.20000
H82B  2   -0.329978    0.189242    0.450159    11.00000   -1.20000
AFIX   0
C83   1   -0.344825   -0.821393    0.535264    11.00000    0.09408    0.09235 =
         0.09759    0.01943    0.03049   -0.01948
AFIX  23
H83A  2   -0.330790   -0.774611    0.521280    11.00000   -1.20000
H83B  2   -0.310061   -0.830061    0.552552    11.00000   -1.20000
AFIX   0
C84   1   -0.360645   -0.923302    0.521517    11.00000    0.11756    0.07376 =
         0.08561    0.02058    0.04935   -0.00346
AFIX  23
H84A  2   -0.390745   -0.914555    0.502541    11.00000   -1.20000
H84B  2   -0.323135   -0.957293    0.517840    11.00000   -1.20000
AFIX   0
C85   1   -0.408800   -1.091329    0.528542    11.00000    0.12426    0.08252 =
         0.06894   -0.00590    0.01372    0.00249
AFIX  23
H85A  2   -0.438929   -1.082954    0.509559    11.00000   -1.20000
H85B  2   -0.373526   -1.133005    0.525192    11.00000   -1.20000
AFIX   0
C86   1   -0.437516   -1.145141    0.548826    11.00000    0.09197    0.05200 =
         0.07178    0.00237   -0.00229    0.01039
AFIX  23
H86A  2   -0.453387   -1.213805    0.540630    11.00000   -1.20000
H86B  2   -0.406787   -1.157508    0.567425    11.00000   -1.20000
AFIX   0
C87   1   -0.522378   -1.142791    0.570116    11.00000    0.06342    0.06554 =
         0.11222    0.00983    0.01286    0.01722
AFIX  23
H87A  2   -0.532135   -1.212458    0.561002    11.00000   -1.20000
H87B  2   -0.561862   -1.105509    0.569066    11.00000   -1.20000
AFIX   0
C88   1   -0.488587   -1.156942    0.602590    11.00000    0.08486    0.03851 =
         0.12509    0.02398    0.03727    0.01326
AFIX  23
H88A  2   -0.513822   -1.201101    0.612684    11.00000   -1.20000
H88B  2   -0.448478   -1.192410    0.603830    11.00000   -1.20000
AFIX   0
C89   1   -0.425744   -1.061950    0.642366    11.00000    0.10196    0.08250 =
         0.08990   -0.00176    0.04165   -0.00421
AFIX  23
H89A  2   -0.427878   -1.002579    0.655643    11.00000   -1.20000
H89B  2   -0.429194   -1.127450    0.653137    11.00000   -1.20000
AFIX   0
C90   1   -0.368662   -1.060154    0.634795    11.00000    0.10678    0.09648 =
         0.04291   -0.00791    0.00278    0.00942
AFIX  23
H90A  2   -0.366375   -1.120530    0.621874    11.00000   -1.20000
H90B  2   -0.335606   -1.068803    0.652779    11.00000   -1.20000
AFIX   0
C91   1   -0.330915   -0.878311    0.637905    11.00000    0.13003    0.11715 =
         0.07292   -0.03975   -0.03408   -0.01253
AFIX  23
H91A  2   -0.289126   -0.897656    0.649236    11.00000   -1.20000
H91B  2   -0.356903   -0.862930    0.651917    11.00000   -1.20000
AFIX   0
C92   1   -0.326853   -0.783462    0.619902    11.00000    0.08597    0.08236 =
         0.21770   -0.07407    0.07196   -0.01556
AFIX  23
H92A  2   -0.308528   -0.724161    0.632515    11.00000   -1.20000
H92B  2   -0.301186   -0.797635    0.605673    11.00000   -1.20000
AFIX   0
C93   1   -0.393547   -0.663474    0.586913    11.00000    0.14315    0.13124 =
         0.13643    0.00056    0.03346   -0.00209
AFIX  23
H93A  2   -0.437127   -0.640140    0.583137    11.00000   -1.20000
H93B  2   -0.367583   -0.607182    0.597905    11.00000   -1.20000
AFIX   0
C94   1   -0.377148   -0.677752    0.559899    11.00000    0.22509    0.05049 =
         0.17114   -0.02202    0.11264   -0.02614
AFIX  23
H94A  2   -0.393312   -0.617727    0.547085    11.00000   -1.20000
H94B  2   -0.331512   -0.675995    0.563424    11.00000   -1.20000
AFIX   0
C95   1   -0.449542   -0.756239    0.519569    11.00000    0.10931    0.10013 =
         0.08373    0.04622   -0.00461    0.02611
AFIX  23
H95A  2   -0.456361   -0.822463    0.508347    11.00000   -1.20000
H95B  2   -0.438007   -0.702092    0.506713    11.00000   -1.20000
AFIX   0
C96   1   -0.508344   -0.724917    0.526964    11.00000    0.10026    0.08737 =
         0.12997    0.00426    0.03911   -0.00242
AFIX  23
H96A  2   -0.503837   -0.655589    0.536633    11.00000   -1.20000
H96B  2   -0.541870   -0.720665    0.509014    11.00000   -1.20000
AFIX   0
C97   1   -0.572797   -0.771452    0.558252    11.00000    0.07796    0.15620 =
         0.15683    0.04804    0.07166    0.01120
AFIX  23
H97A  2   -0.610560   -0.765916    0.542332    11.00000   -1.20000
H97B  2   -0.563963   -0.701532    0.567329    11.00000   -1.20000
AFIX   0
C98   1   -0.583411   -0.847409    0.580547    11.00000    0.10034    0.21256 =
         0.13301    0.02645    0.03526    0.01288
AFIX  23
H98A  2   -0.618336   -0.825079    0.588937    11.00000   -1.20000
H98B  2   -0.592191   -0.918105    0.571978    11.00000   -1.20000
AFIX   0
C99   1   -0.531326   -0.897594    0.628770    11.00000    0.12096    0.11349 =
         0.09340   -0.00747    0.05730    0.01091
AFIX  23
H99A  2   -0.569160   -0.872974    0.634435    11.00000   -1.20000
H99B  2   -0.495435   -0.877383    0.644540    11.00000   -1.20000
AFIX   0
C100  1   -0.533509   -1.016935    0.626232    11.00000    0.11662    0.08778 =
         0.14033    0.03559    0.04861    0.04839
AFIX  23
H10A  2   -0.534617   -1.048088    0.645409    11.00000   -1.20000
H10B  2   -0.571445   -1.038473    0.611876    11.00000   -1.20000
AFIX   0
HKLF 4


REM  ja665 in P2(1)/c
REM R1 =  0.1169 for    6505 Fo > 4sig(Fo)  and  0.2102 for all   13852 data
REM   1273 parameters refined using     59 restraints

END

WGHT      0.1855     38.2665

REM Highest difference peak  0.894,  deepest hole -0.788,  1-sigma level  0.085
Q1    1  -0.1821 -0.0189  0.4182  11.00000  0.05    0.89
Q2    1  -0.1076 -0.0144  0.4406  11.00000  0.05    0.75
Q3    1  -0.3411 -0.6839  0.5911  11.00000  0.05    0.61
Q4    1   0.0016  0.1863  0.5883  11.00000  0.05    0.55
Q5    1  -0.0073 -0.1937  0.8456  11.00000  0.05    0.54
Q6    1   0.0028  0.3754  0.5053  11.00000  0.05    0.48
Q7    1  -0.0082  0.3089  0.5128  11.00000  0.05    0.41
Q8    1  -0.0714  0.5092  0.4572  11.00000  0.05    0.39
Q9    1   0.1262 -0.2783  0.7112  11.00000  0.05    0.39
Q10   1   0.0012 -0.3160  0.6956  11.00000  0.05    0.36
Q11   1  -0.2426 -0.9845  0.6522  11.00000  0.05    0.36
Q12   1  -0.1315  0.2603  0.4490  11.00000  0.05    0.35
Q13   1  -0.3189 -1.1360  0.6554  11.00000  0.05    0.35
Q14   1  -0.4707 -0.8523  0.6600  11.00000  0.05    0.35
Q15   1   0.1929 -0.1210  0.7721  11.00000  0.05    0.35
Q16   1   0.1835 -0.1397  0.7510  11.00000  0.05    0.35
Q17   1  -0.5256 -0.6426  0.5068  11.00000  0.05    0.33
Q18   1  -0.3127 -1.1440  0.5298  11.00000  0.05    0.33
Q19   1   0.1225 -0.4574  0.7660  11.00000  0.05    0.33
Q20   1  -0.0291 -0.3734  0.7298  11.00000  0.05    0.32
;
_shelx_res_checksum    7388

_shelx_hkl_file
;
   0   0  -4 7155.65 308.325   1
   0   0  -5-87.0881 82.1788   1
   0   0  -6 13905.1 547.136   1
   0   0  -7-486.083 180.965   1
   0   0  -8 4628.18 410.305   1
   0   0  -9-207.876 143.546   1
   0   0 -10 3454.21 366.909   1
   0   0 -11 225.681 189.527   1
   0   0  11-196.217 92.6747  10
   0   0  12 38390.0 755.933   8
   0   0 -12 36200.2 1181.10   1
   0   0  13-63.1760 87.4299   3
   0   0  13 61.6714 77.8217  10
   0   0 -13-149.467 138.297   1
   0   0  13-107.580 113.471   8
   0   0  14 6741.18 525.034   3
   0   0  14 6657.88 357.438   8
   0   0 -14 7637.89 603.850   1
   0   0  15 5.99669 96.4427   3
   0   0 -15 68.1763 110.032   1
   0   0  15-30.6801 61.7260   5
   0   0  15 0.06494 96.0633   8
   0   0  16 2920.59 260.662   8
   0   0 -16 3085.93 411.670   1
   0   0  16 2948.48 372.746   3
   0   0  16 2936.51 233.884   5
   0   0  17-25.5868 136.266   3
   0   0  17-44.9277 68.4203   5
   0   0 -17-311.904 192.157   1
   0   0  17-69.3214 82.4999   8
   0   0  18 943.645 262.657   3
   0   0  18 569.292 168.528   8
   0   0  18 922.821 153.402   5
   0   0 -18 862.500 229.377   1
   0   0 -19 101.293 118.408   1
   0   0  19-19.3527 73.5550   5
   0   0  19-153.109 185.921   3
   0   0  19-147.979 130.573   8
   0   0  20 419.793 148.523   8
   0   0  20 378.381 122.222   3
   0   0 -20 170.072 107.786   1
   0   0  20 610.147 144.876   5
   0   0  21 41.9481 87.6841   5
   0   0 -21 51.6224 149.222   1
   0   0  21 66.3162 115.391   8
   0   0  21 294.986 190.792   3
   0   0  22 635.501 160.836   5
   0   0 -22 592.683 237.478   1
   0   0  22 642.566 199.616   8
   0   0  22 383.784 118.530   3
   0   0 -23 17.4391 119.276   1
   0   0 -23-17.5697 133.073   2
   0   0  23 88.1281 124.094   5
   0   0  23-44.4425 143.256   3
   0   0  23-158.568 152.677   8
   0   0  24 1094.41 269.218   8
   0   0 -24 448.309 178.050   1
   0   0 -24 465.027 252.032   2
   0   0  24 409.145 185.555   3
   0   0  24 911.109 249.370   5
   0   0  25 153.672 163.885   8
   0   0  25-93.9300 120.137   3
   0   0  25-158.726 107.573   5
   0   0 -25-155.073 180.649   1
   0   0  26 462.247 169.579   8
   0   0  26 674.052 195.635   5
   0   0  27 146.475 138.430   8
   0   0  27 41.4609 105.098   5
   0   0  28 2619.87 385.143   8
   0   0  28 2097.33 320.011   5
   0   0  29-36.8024 108.749   5
   0   0  29-76.1502 152.160   8
   0   0  30 247.790 125.243   5
   0   0  30 189.596 166.521   8
   0   0  31 155.600 144.444   5
   0   0  31-286.011 134.036   4
   0   0  31-400.342 239.813   8
   0   0  32-28.8134 174.695   8
   0   0  32 0.16563 131.441   5
   0   0  32-23.4869 110.248   4
   0   0  33-107.960 171.365   4
   0   0  33 226.273 166.699   5
   0   0  33 37.7973 191.389   8
   0   0  34 67.1942 169.053   8
   0   0  34-167.354 160.039   4
   0   0  34 0.18408 144.214   5
   0   0  35 33.4477 129.180   4
   0   0  35 64.7563 181.221   5
   0   0  35 0.44584 146.553   8
   0   0  36 286.440 198.992   5
   0   0  36-57.4278 197.665   8
   0   0  37 59.7659 169.976   5
   0   0  37 33.9969 199.775   8
   0   0  38 781.258 291.801   8
   0   0  38 509.436 240.486   5
   0   0  39-59.6058 189.992   8
   0   0  39-429.393 228.951   5
   0   0  40 242.067 160.913   8
   0   0  40 280.792 239.536   5
   0   0  41 5.61172 187.058   8
   0   0  41-304.556 230.589   5
   0   0  42 202.012 185.698   5
   0   0  42-37.1094 147.726   8
   0   0  43-20.9907 170.181   5
   0   0  44-166.216 156.993   5
   0   0  45-156.391 263.031   5
   0   0  46-36.8223 154.060   5
   0   1   0-5.69955 50.4028   3
   0   1  -1 5796.89 311.495   3
   0  -1  -1 5927.08 342.116   1
   0   1  -2 26156.3 657.497   3
   0  -1  -2 26760.9 752.831   1
   0  -1  -3 188.917 71.9985   1
   0   1  -3 280.294 61.7367   3
   0   1  -4 12452.0 472.052   3
   0  -1  -4 9995.48 486.534   1
   0  -1  -5 1023.91 198.979   1
   0   1  -5 1540.83 201.546   3
   0   1  -6 26008.4 708.927   3
   0  -1   6 24314.3 750.439   3
   0  -1  -6 26298.6 867.391   1
   0   1   7 958.106 242.882   1
   0   1  -7 1176.79 201.770   3
   0  -1   7 930.737 203.331   3
   0  -1  -7 834.357 231.571   1
   0  -1  -7 822.380 118.716   2
   0   1  -8 5582.06 383.037   3
   0   1   8 6105.95 503.545   1
   0  -1   8 5862.85 434.616   3
   0  -1  -8 5756.56 467.811   1
   0  -1   9 15532.5 683.374   3
   0  -1  -9 14761.7 762.852   1
   0   1  -9 14953.9 599.026   3
   0   1   9 14378.1 748.388   1
   0   1  10 4546.80 465.806   1
   0   1  10 4169.84 261.435   8
   0  -1 -10 4789.62 505.390   1
   0  -1  10 4839.09 443.382   3
   0  -1  11 24205.7 959.656   3
   0  -1 -11 22497.2 984.509   1
   0   1  11 23733.1 548.257   8
   0  -1  12 24291.9 1024.40   3
   0  -1 -12 22650.0 1033.90   1
   0   1  12 22850.5 575.627   8
   0  -1 -12 20809.8 510.293   7
   0   1  12 20221.7 980.419   1
   0   1  13 1259.89 172.833   8
   0  -1  13 1272.64 186.603   8
   0  -1  13 1623.32 320.804   3
   0  -1 -13 1537.03 336.977   1
   0   1  13 1221.59 170.749  10
   0  -1 -13 1318.77 157.065   7
   0  -1 -14 1357.16 154.211   7
   0   1  14 1410.87 181.376   8
   0   1  14 1623.30 186.055  10
   0  -1  14 1928.21 337.678   3
   0  -1  14 1583.11 202.163   8
   0  -1 -14 1417.70 307.602   1
   0  -1  15 1848.26 198.948   5
   0  -1  15 1733.13 302.526   3
   0   1  15 1643.67 203.624  10
   0  -1 -15 1349.25 161.830   7
   0  -1 -15 1534.34 308.205   1
   0   1  15 1447.59 201.631   8
   0  -1 -15 1692.70 258.351   2
   0  -1  15 1620.64 218.613   8
   0  -1 -16 465.377 99.9377   7
   0  -1 -16 488.865 165.256   2
   0   1 -16 243.859 154.638   1
   0  -1 -16 356.297 170.171   1
   0   1  16 441.976 133.878   8
   0  -1  16 484.524 143.139   8
   0  -1  16 534.392 154.805   3
   0  -1  16 442.715 117.736   5
   0   1  16 437.828 117.646  10
   0  -1 -17 664.556 235.087   1
   0  -1  17 738.132 207.422   3
   0  -1  17 641.686 134.676   5
   0   1  17 679.249 160.113   8
   0   1 -17 741.943 218.523   1
   0   1  17 569.531 150.551  10
   0  -1  17 536.875 142.209   8
   0  -1 -17 728.258 198.164   2
   0  -1 -17 616.837 131.345   7
   0   1 -18 168.800 205.618   1
   0  -1 -18 57.4944 121.831   1
   0  -1  18 92.6329 149.641   3
   0  -1  18-0.96766 92.5326   8
   0   1  18-27.5845 90.0729   8
   0  -1  18 60.4261 85.9242   5
   0   1  18-54.5004 97.3727  10
   0  -1 -18 156.149 91.4229   7
   0  -1 -18 122.893 124.756   2
   0  -1 -19 1242.27 166.273   7
   0  -1 -19 1492.97 343.708   1
   0  -1  19 1593.25 330.324   3
   0  -1  19 1716.43 218.548   5
   0   1  19 1273.49 206.941  10
   0  -1  19 1272.67 221.167   8
   0   1 -19 1819.52 376.542   1
   0  -1 -19 1831.93 293.304   2
   0   1  19 1176.28 200.446   8
   0  -1 -20 261.341 214.960   1
   0   1 -20 255.100 125.006   1
   0   1  20 367.933 130.925   8
   0  -1  20 306.487 135.565   5
   0  -1 -20 99.9147 97.7884   7
   0   1  20 114.914 141.507  10
   0  -1 -20 353.236 163.857   2
   0  -1  20-42.0843 141.815   3
   0  -1  20 47.6443 123.863   8
   0  -1 -21 263.981 109.377   2
   0  -1 -21 446.896 124.411   7
   0  -1  21 467.124 165.328   5
   0  -1 -21 517.196 211.183   1
   0   1  21 470.911 135.127   5
   0  -1  21 329.754 169.230   3
   0   1  21 325.592 153.222   8
   0  -1  21 223.397 111.355   8
   0   1 -21 682.742 220.275   1
   0   1  21 428.224 160.566  10
   0  -1  22 283.628 164.191   3
   0  -1 -22 321.671 224.037   1
   0   1  22 338.610 141.403   5
   0   1  22 246.369 193.668   3
   0   1  22 820.302 227.541   8
   0  -1  22 293.794 162.417   8
   0  -1 -22 494.265 191.601   2
   0   1 -22 633.137 255.977   1
   0  -1 -22 664.647 164.975   7
   0  -1  22 605.909 187.109   5
   0  -1 -23 545.004 220.458   1
   0   1  23 918.204 178.567   5
   0  -1  23 543.057 215.616   3
   0  -1  23 900.353 188.030   5
   0   1  23 765.464 223.955   3
   0   1  23 706.847 183.164   8
   0  -1  23 539.154 179.697   8
   0  -1  23 608.047 157.183   4
   0   1 -23 729.348 231.361   1
   0  -1  24 1.12213 112.387   4
   0   1  24 353.654 178.354   8
   0  -1  24-113.207 164.353   3
   0  -1  24 258.660 140.431   5
   0   1  24 237.638 111.151   5
   0  -1  24 27.3323 121.369   8
   0   1  24-124.270 195.815   3
   0  -1 -24 387.507 214.007   1
   0   1 -24 287.807 226.665   1
   0  -1 -25 546.784 219.190   1
   0   1 -25 830.055 246.712   1
   0  -1  25 675.023 198.884   5
   0   1  25 712.625 164.437   5
   0  -1  25 563.446 188.759   8
   0   1  25 431.462 146.301   8
   0  -1  25 1024.19 286.253   3
   0  -1  25 941.644 199.538   4
   0   1  26 661.083 214.268   8
   0  -1  26 861.988 199.527   4
   0  -1  26 744.159 240.232   8
   0  -1  26 583.885 183.064   5
   0   1  26 756.584 196.283   5
   0  -1  27 144.243 178.049   8
   0   1  27 251.658 125.102   5
   0  -1  27 86.2067 97.4425   4
   0  -1  27 124.825 152.638   5
   0   1  27 137.208 131.752   8
   0   1  28 3014.39 371.452   5
   0  -1  28 3008.24 352.403   4
   0  -1  28 3191.47 380.146   5
   0   1  28 2526.82 367.249   8
   0  -1  28 2766.22 406.969   8
   0  -1  29 176.066 139.008   4
   0  -1  29 293.437 130.926   8
   0   1  29 8.36755 113.715   5
   0  -1  29-187.042 180.532   5
   0   1  29 43.0490 168.051   8
   0  -1  30 1793.17 357.613   8
   0  -1  30 2100.20 352.894   5
   0  -1  30 2157.18 327.678   4
   0   1  30 1790.66 353.538   8
   0   1  30 2178.50 351.875   5
   0  -1  31 212.960 188.392   5
   0  -1  31 236.375 205.746   8
   0  -1  31 462.762 189.037   4
   0   1  31 96.0677 158.530   5
   0   1  31-273.157 216.978   8
   0  -1  32 330.473 180.402   5
   0  -1  32 522.147 216.585   8
   0   1  32 171.472 147.676   8
   0  -1  32 498.700 193.915   4
   0   1  32 265.422 186.919   5
   0  -1  33 44.6614 145.911   5
   0   1  33 156.376 185.568   5
   0  -1  33 0.20829 160.352   8
   0   1  33-255.634 183.281   8
   0  -1  33-219.679 145.047   4
   0  -1  34-17.7772 108.868   4
   0  -1  34 116.983 163.085   8
   0  -1  34 124.628 141.704   5
   0   1  34-23.4132 175.038   8
   0   1  34 289.917 169.480   5
   0   1  35 470.186 252.180   8
   0  -1  35 617.988 258.555   5
   0  -1  35-14.7850 159.673   8
   0   1  35 808.753 292.702   5
   0  -1  36 270.774 227.903   5
   0   1  36-48.5907 164.983   5
   0   1  36-72.5023 203.273   8
   0   1  36 396.262 186.240   4
   0  -1  36-142.315 180.783   8
   0   1  37 161.316 194.601   8
   0  -1  37 123.780 159.026   5
   0   1  37 419.183 219.833   5
   0  -1  37-168.005 199.197   8
   0   1  38 90.2663 158.556   5
   0  -1  38 168.342 225.498   8
   0  -1  38 302.513 251.694   5
   0   1  38 270.901 253.509   8
   0  -1  39-205.139 216.647   8
   0   1  39 374.497 231.157   8
   0   1  39 132.684 167.979   5
   0  -1  39 160.578 254.758   5
   0   1  40 559.212 232.718   5
   0   1  40 472.193 244.525   8
   0  -1  40 303.864 243.407   5
   0  -1  41 288.299 212.808   5
   0   1  41 315.046 159.245   5
   0   1  41 348.843 214.497   8
   0   1  42 290.774 233.751   5
   0  -1  42 335.766 258.669   5
   0   1  42 27.7120 171.535   8
   0   1  43-492.330 280.241   8
   0   1  43-149.345 184.065   5
   0  -1  43 137.855 174.494   5
   0  -1  44 326.487 160.214   5
   0   1  44 439.596 237.597   5
   0   1  44 77.6701 216.439   8
   0   1  45-72.5816 196.171   5
   0  -1  45 145.528 193.077   5
   0   2   0 14853.9 716.178   3
   0   2  -1 374.019 206.714   3
   0  -2  -1 152.644 162.080   1
   0  -2  -2 202.757 162.928   1
   0   2  -2 102.812 145.786   3
   0  -2  -3 14650.5 803.525   1
   0   2  -3 15016.5 702.221   3
   0  -2  -4 3101.36 462.156   1
   0   2  -4 2939.14 395.836   3
   0  -2   4 3434.26 415.170   3
   0   2  -5 11125.4 636.085   3
   0  -2  -5 12062.8 758.231   1
   0  -2   5 12275.0 704.848   3
   0  -2   6 2287.72 316.041   3
   0  -2  -6 2098.91 338.521   1
   0   2  -6 2085.14 279.065   3
   0  -2   7 2037.62 309.022   3
   0  -2  -7 2173.10 347.168   1
   0   2   7 1692.59 297.989   1
   0  -2   7 1419.34 137.199   6
   0   2  -7 1904.84 271.262   3
   0   2   7 1360.63 133.952   8
   0  -2   8 19273.7 877.371   3
   0  -2   8 18516.9 479.336   4
   0   2   8 19970.6 475.214   8
   0   2  -8 19668.7 834.722   3
   0   2   8 20003.5 985.607   1
   0  -2  -8 18190.6 955.166   1
   0  -2  -8 19242.0 545.007   7
   0   2   9 1745.74 279.438   1
   0   2   9 1427.29 165.223   8
   0   2  -9 1881.13 259.689   3
   0  -2   9 1603.46 158.054   4
   0  -2  -9 1655.16 337.745   1
   0  -2   9 1895.39 300.068   3
   0  -2  -9 1648.43 213.758   7
   0  -2 -10 1531.41 191.053   7
   0  -2  10 1400.69 241.307   3
   0  -2  10 1445.10 150.786   4
   0   2  10 1607.12 160.349   8
   0   2  10 1499.73 291.175   1
   0  -2 -10 1515.77 291.233   1
   0   2 -10 1564.03 250.976   3
   0  -2  11 102.536 111.806   3
   0   2  11 179.968 79.1941   8
   0  -2 -11 23.8038 135.287   1
   0   2  11 109.098 128.635   1
   0   2 -11 12.0804 127.101   3
   0  -2  11 84.8725 64.6163   4
   0  -2 -11 501.477 146.411   7
   0  -2 -12 939.909 279.109   1
   0  -2  12 767.306 229.266   3
   0   2  12 551.549 202.206   1
   0   2 -12 743.133 170.656   3
   0  -2  12 725.513 133.316   4
   0  -2 -12 750.748 157.707   7
   0   2  12 669.663 119.302   8
   0   2  13 1170.43 192.524  10
   0   2 -13 1006.06 202.817   3
   0  -2  13 1071.91 252.424   3
   0  -2  13 908.889 140.534   5
   0   2  13 1109.85 286.784   1
   0  -2 -13 985.805 203.094   7
   0  -2  13 927.099 137.736   4
   0  -2  13 931.220 181.636   8
   0   2  13 1061.99 153.687   8
   0  -2 -13 1177.75 332.080   1
   0   2  14 130.795 158.100   1
   0   2  14-68.4292 82.6124   8
   0   2  14 92.1164 107.976  10
   0  -2  14-23.5333 87.3014   8
   0  -2 -14 125.613 102.355   7
   0  -2  14 318.905 165.686   3
   0  -2  14 14.5127 95.4684   4
   0  -2  14-159.364 110.278   5
   0  -2 -14-16.3400 143.638   1
   0  -2  15 214.810 87.7640   5
   0   2  15 243.334 158.113   1
   0  -2  15 284.300 159.211   3
   0   2  15 331.427 123.699   8
   0  -2  15 284.742 108.386   4
   0  -2 -15 261.291 111.882   7
   0  -2  15 409.412 163.348   8
   0  -2 -15 382.308 234.996   1
   0   2  15 391.548 147.419  10
   0  -2  16 155.369 86.5116   4
   0   2  16-6.69784 163.559   1
   0  -2  16 33.5277 92.5173   8
   0  -2  16-58.2356 117.898   5
   0   2  16 100.017 91.0600   8
   0   2  16 127.124 99.0004  10
   0  -2  16 41.4259 139.079   3
   0  -2 -16 366.895 144.240   7
   0  -2 -16 47.6838 145.872   1
   0   2  17 1545.35 212.302   8
   0  -2  17 1307.12 195.686   5
   0   2  17 1598.81 236.495  10
   0  -2  17 1543.29 322.551   3
   0  -2  17 1453.44 207.643   4
   0  -2 -17 1461.16 214.255   7
   0  -2 -17 1359.97 350.717   1
   0  -2  17 1460.52 243.757   8
   0   2  17 1413.96 338.730   1
   0  -2  18 994.465 159.030   5
   0  -2  18 1024.87 212.834   8
   0  -2  18 762.535 165.037   4
   0  -2 -18 993.049 205.365   7
   0   2  18 1065.93 233.120  10
   0  -2 -18 1139.52 349.615   1
   0   2  18 873.537 181.589   8
   0  -2  18 1018.32 284.783   3
   0  -2  19 6100.94 416.127   4
   0   2  19 6715.27 429.613   8
   0  -2  19 5678.71 592.908   3
   0  -2 -19 6018.75 419.747   7
   0  -2  19 5795.76 435.150   8
   0   2  19 6394.73 453.275  10
   0  -2  19 6703.34 420.209   5
   0  -2 -19 6820.81 735.382   1
   0  -2  20 278.179 154.905   3
   0   2  20 318.358 127.419   8
   0  -2 -20 272.027 170.750   1
   0  -2 -20 113.612 130.032   7
   0  -2  20 197.522 117.614   4
   0  -2  20 214.771 125.188   5
   0   2  20 251.826 146.008  10
   0  -2  20 90.4088 146.235   8
   0  -2 -21 447.977 230.738   1
   0  -2  21 520.697 155.048   5
   0   2 -21 498.118 246.824   1
   0   2  21 843.017 193.503   8
   0  -2 -21 698.908 179.937   7
   0  -2  21 257.198 109.717   4
   0  -2  21 679.107 245.427   3
   0   2  21 854.855 198.671  10
   0  -2  21 650.254 198.743   8
   0  -2  22 35.2959 110.732   4
   0  -2 -22 231.973 188.047   1
   0  -2  22 271.335 189.982   3
   0   2 -22 94.4449 170.783   1
   0  -2 -22 30.3668 126.534   7
   0  -2  22 199.274 145.609   8
   0  -2  22 262.953 130.331   5
   0   2  22 38.8425 130.434   8
   0   2  22 53.5575 115.178  10
   0  -2  23 465.655 160.920   8
   0   2 -23-57.1733 141.083   1
   0  -2  23 291.912 125.455   4
   0  -2  23 77.5525 131.158   3
   0   2  23 393.667 215.548  10
   0   2  23 373.606 145.721   8
   0  -2 -23 421.042 180.118   7
   0  -2  23 357.876 132.261   5
   0  -2 -23 282.092 160.659   1
   0   2  24 453.165 161.387  10
   0  -2  24 803.452 258.078   3
   0  -2  24 432.151 199.269   8
   0   2  24 361.015 152.023   8
   0  -2 -24 194.363 165.326   1
   0   2 -24 689.300 251.059   1
   0  -2  24 389.014 137.144   4
   0  -2 -24 323.824 158.050   7
   0  -2  24 443.168 159.526   5
   0   2  25 72.2246 125.433  10
   0  -2  25-192.202 161.796   8
   0  -2  25-24.3631 103.863   4
   0  -2 -25-109.924 116.909   7
   0   2  25 125.592 121.681   5
   0  -2  25 33.0255 113.718   5
   0   2  25 57.3198 124.993   8
   0  -2  26 381.632 192.528   5
   0  -2  26 78.6658 113.890   8
   0   2  26 29.9826 127.568  10
   0  -2  26 244.894 125.582   4
   0   2  26 169.868 115.916   5
   0   2  26 213.456 115.348   8
   0  -2  27 689.106 228.518   8
   0   2  27 467.203 160.634   8
   0  -2  27 533.946 218.318   5
   0  -2  27 541.762 214.120   4
   0   2  27 515.369 157.338   5
   0   2  28 109.716 108.301   5
   0  -2  28 196.738 165.807   5
   0  -2  28 113.722 108.842   4
   0  -2  28 236.729 154.018   8
   0   2  28 119.880 154.206   8
   0   2  29 61.9734 156.676   8
   0   2  29 60.3287 131.578   5
   0  -2  29 275.510 146.071   4
   0  -2  29 309.802 175.440   5
   0  -2  29 147.531 128.411   8
   0  -2  30-5.77068 159.082   8
   0  -2  30 259.597 151.967   4
   0   2  30 107.374 154.601   8
   0  -2  30 89.5227 138.912   5
   0   2  30 115.873 127.975   5
   0  -2  31 236.455 189.845   8
   0   2  31 109.825 149.549   8
   0  -2  31 176.875 162.669   4
   0  -2  31 225.575 160.979   5
   0   2  31 30.2573 121.105   5
   0  -2  32 582.442 188.552   4
   0  -2  32 706.776 282.797   8
   0  -2  32 476.843 192.205   5
   0   2  32 298.102 228.495   8
   0   2  32 525.645 186.868   5
   0   2  33 263.456 173.469   5
   0   2  33 52.4919 158.936   8
   0  -2  33 33.0360 150.451   4
   0  -2  33-58.0310 153.095   8
   0  -2  33 114.922 184.477   5
   0  -2  34 263.302 259.598   8
   0   2  34-122.662 144.342   5
   0   2  34 229.070 223.839   8
   0  -2  34 254.433 237.577   5
   0   2  35 320.263 270.528   8
   0  -2  35 0.22043 154.190   5
   0   2  35 0.18435 132.564   5
   0  -2  36 88.7929 172.038   5
   0   2  36 63.7515 163.292   5
   0   2  36-6.55324 162.428   8
   0  -2  37 401.190 241.722   5
   0   2  37 159.316 164.723   5
   0   2  37 396.358 222.540   8
   0   2  38-16.2537 185.897   8
   0  -2  38-159.035 186.327   5
   0   2  38 117.254 211.541   5
   0   2  39 115.446 173.632   5
   0   2  39-367.865 266.211   8
   0  -2  39-151.960 207.298   5
   0   2  40 136.215 217.432   8
   0   2  40 371.103 221.182   5
   0   2  41 422.559 196.495   5
   0  -2  41 662.390 285.196   5
   0   2  41 172.586 212.092   8
   0   2  42 141.247 170.502   8
   0  -2  42 84.4570 237.609   5
   0   2  42 249.369 207.519   5
   0  -2  43 147.544 239.888   5
   0   2  43 336.715 169.203   8
   0   2  44-26.0047 165.697   8
   0   2  44 117.201 161.333   5
   0  -2  44-117.687 223.555   5
   0   2  45 126.212 158.510   5
   0  -2  45-48.4013 167.843   5
   0   3   0 50.0878 167.058   3
   0  -3   0-128.964 88.1669   9
   0  -3   0 66.7523 103.744   7
   0  -3  -1 37907.1 735.189   7
   0  -3  -1 40336.8 685.945   9
   0   3   1 35957.5 1441.27   3
   0  -3   1 39336.3 714.050   7
   0   3  -1 36424.0 1355.29   3
   0  -3  -2 4055.51 217.024   9
   0   3  -2 4447.59 482.811   3
   0   3   2 4991.29 519.007   3
   0  -3  -2 3466.99 259.020  11
   0  -3  -2 4614.76 542.186   1
   0  -3   3 3060.65 238.730   4
   0  -3  -3 3091.02 464.964   1
   0  -3  -3 2989.07 212.411   9
   0  -3  -3 2797.93 241.186  11
   0   3  -3 2772.03 370.128   3
   0  -3  -4 79285.2 1235.80  11
   0  -3  -4 80499.2 1079.83   9
   0  -3  -4 74698.3 2137.40   1
   0  -3   4 77437.1 2019.94   3
   0   3  -4 75586.5 1892.26   3
   0  -3   4 76149.0 1146.49   4
   0  -3  -5 10287.4 468.783  11
   0  -3   5 8534.21 672.336   3
   0  -3  -5 10262.7 410.325   9
   0  -3   5 8525.70 395.835   4
   0  -3  -5 7852.33 685.225   1
   0   3  -5 8029.21 614.350   3
   0  -3   5 8920.76 317.476   6
   0  -3   6 6188.64 577.388   3
   0   3  -6 5496.38 524.771   3
   0  -3  -6 5082.74 346.073  11
   0  -3   6 5237.65 254.273   6
   0  -3  -6 5415.94 308.255   9
   0   3   6 5514.08 596.986   1
   0  -3  -6 5981.33 634.656   1
   0  -3   6 5141.91 312.387   4
   0  -3  -7 4069.05 521.464   1
   0  -3  -7 3015.30 272.733  11
   0  -3   7 3220.40 251.467   4
   0  -3   7 3139.68 211.119   6
   0   3  -7 3905.90 432.216   3
   0  -3   7 3666.43 448.833   3
   0   3   7 3786.40 510.466   1
   0  -3  -8 282.434 244.998   1
   0  -3   8 463.328 280.472   3
   0   3  -8 321.361 188.802   3
   0   3   8 234.418 142.059   8
   0  -3   8 270.641 112.059   4
   0  -3  -8 23.1025 84.2956  11
   0  -3   8 314.239 108.459   6
   0   3   8 238.920 278.601   1
   0  -3   9 2400.38 224.560   6
   0  -3   9 2651.54 407.494   3
   0   3   9 2818.31 446.548   1
   0  -3   9 2626.58 242.398   5
   0   3   9 2102.14 226.251   8
   0  -3  -9 2725.62 471.263   1
   0  -3  -9 2870.92 272.220   7
   0   3  -9 2430.56 337.721   3
   0  -3   9 2392.38 223.436   4
   0  -3 -10 5870.46 384.549   7
   0  -3  10 5499.63 329.119   6
   0   3  10 5913.90 631.489   1
   0  -3  10 5444.42 344.697   4
   0  -3  10 6201.66 608.149   3
   0  -3  10 5918.10 338.079   5
   0   3 -10 6134.16 556.369   3
   0  -3 -10 5837.45 669.628   1
   0   3  10 5819.67 328.980   8
   0   3  11 439.657 189.325   1
   0  -3 -11 162.196 160.629   1
   0  -3 -11 391.156 155.278   7
   0   3 -11 290.124 146.561   3
   0  -3  11 362.596 127.693   4
   0   3  11 267.775 125.053  10
   0   3  11 179.716 103.326   8
   0  -3  11 276.754 107.655   5
   0  -3  11 158.322 141.276   3
   0  -3  12-20.5521 83.2884   4
   0  -3 -12-16.6962 111.924   7
   0   3  12 37.2789 87.2983   8
   0   3  12 37.1784 113.575  10
   0  -3  12-113.682 141.528   3
   0   3  12 129.376 188.784   1
   0   3 -12-25.2129 99.8584   3
   0  -3 -12-285.440 214.921   1
   0  -3  12 266.848 129.508   5
   0  -3 -13 10966.0 955.913   1
   0   3  13 11936.0 936.706   1
   0   3 -13 10399.0 747.615   3
   0  -3 -13 10025.4 543.081   7
   0  -3  13 10660.3 826.629   3
   0   3  13 10218.2 458.278   8
   0  -3  13 11016.3 500.255   5
   0   3  13 8961.33 490.475  10
   0  -3  13 10608.7 493.226   4
   0  -3 -14 678.727 283.299   1
   0  -3  14 611.562 233.717   3
   0   3  14 713.924 147.706  10
   0  -3 -14 724.659 187.936   7
   0  -3  14 603.167 134.431   4
   0   3 -14 676.303 220.055   3
   0  -3  14 751.604 165.589   5
   0   3  14 649.830 264.585   1
   0   3  14 672.743 146.841   8
   0  -3 -15 194.208 156.868   7
   0  -3 -15-81.1482 176.012   1
   0   3  15 247.885 173.926   1
   0   3 -15 326.975 168.977   3
   0  -3  15 84.5144 116.686   3
   0  -3  15 303.022 137.167   4
   0   3  15 344.532 146.133   8
   0   3  15 427.002 144.305  10
   0  -3  15 412.254 162.904   5
   0  -3  16 1491.13 334.485   3
   0  -3  16 1797.95 233.679   5
   0   3  16 1455.62 234.158  10
   0   3  16 1652.23 206.457   8
   0  -3 -16 1786.62 396.026   1
   0  -3  16 1266.79 199.107   4
   0   3  16 1561.03 353.497   1
   0  -3 -16 1642.25 272.372   7
   0   3 -16 1669.60 305.200   3
   0   3  17 1644.61 379.855   1
   0   3 -17 1489.85 299.253   3
   0   3  17 1670.10 228.360   8
   0  -3 -17 1625.46 410.039   1
   0  -3  17 1938.95 251.870   5
   0  -3 -17 1654.43 262.505   7
   0  -3  17 1920.83 368.466   3
   0  -3  17 1287.03 206.920   4
   0   3  17 1676.22 263.185  10
   0  -3  18 7276.62 708.512   3
   0  -3 -18 6821.65 495.058   7
   0   3  18 9128.34 873.810   1
   0  -3  18 7727.57 491.681   5
   0  -3  18 7367.67 486.618   4
   0   3  18 6786.46 485.767  10
   0   3  18 7226.07 448.809   8
   0  -3 -18 8846.87 902.656   1
   0  -3  19 231.759 135.184   4
   0  -3 -19 209.211 161.366   7
   0  -3 -19-99.8773 199.870   1
   0   3  19 38.3038 130.618   1
   0  -3  19-5.76239 100.284   5
   0  -3  19 138.240 145.346   3
   0   3  19-38.1268 103.340   8
   0   3  19 253.597 152.453  10
   0   3  20 2992.11 346.170  10
   0  -3 -20 2808.91 331.039   7
   0  -3  20 3146.18 334.028   5
   0  -3  20 3065.50 347.472   4
   0  -3 -20 2814.21 561.497   1
   0  -3  20 2698.38 440.741   3
   0   3  20 3055.24 317.202   8
   0   3  20 3143.41 541.905   1
   0   3  21 897.270 225.415  10
   0   3  21 898.016 195.709   8
   0  -3  21 1003.73 208.083   5
   0  -3 -21 895.336 206.501   7
   0  -3  21 724.563 224.951   3
   0  -3 -21 1090.30 355.372   1
   0  -3  21 996.907 211.081   4
   0   3  21 893.568 270.363   1
   0   3  22 254.046 166.307   8
   0   3  22 381.755 190.045  10
   0  -3 -22-97.6977 303.115   1
   0  -3  22 337.763 137.833   5
   0  -3  22 101.723 160.685   3
   0  -3  22 358.154 142.819   4
   0  -3 -22 53.3025 145.068   7
   0   3  23 212.472 122.913  10
   0  -3 -23 262.514 166.168   7
   0  -3  23-168.625 127.095   4
   0  -3  23 129.771 165.136   3
   0  -3  23-105.141 156.090   5
   0   3  23-141.615 159.241   8
   0   3  24 200.030 130.577  10
   0   3  24 42.3743 129.972   8
   0  -3 -24 186.201 145.681   7
   0  -3  24 186.591 124.277   5
   0  -3  24 375.875 162.541   4
   0  -3  25 549.633 185.777   4
   0  -3  25-73.9090 164.232   5
   0   3  25 352.803 164.727  10
   0   3  25 192.912 138.956   8
   0  -3 -25-4.93028 156.998   7
   0   3  26 326.970 176.413   8
   0   3  26 552.947 232.259  10
   0  -3  26 284.786 133.899   4
   0  -3  26 274.210 172.248   5
   0  -3 -26 606.132 202.278   7
   0   3  27-90.8330 147.455   8
   0  -3  27 87.5006 102.410   4
   0  -3  27 104.320 136.067   5
   0   3  27 194.280 166.462  10
   0  -3 -27 147.199 163.685   7
   0  -3  28 25.5125 124.446   5
   0   3  28 0.13067 107.874   5
   0   3  28 390.834 212.539   8
   0  -3  28 14.5772 149.166   4
   0   3  28 472.270 272.947  10
   0  -3 -28 168.000 135.795   7
   0  -3  29 1580.28 319.383   5
   0  -3  29 1541.87 296.328   4
   0   3  29 1472.83 314.697  10
   0   3  29 1683.83 336.447   8
   0   3  29 1571.37 289.547   5
   0  -3  30 508.257 205.279   4
   0   3  30 572.565 246.966   8
   0   3  30 190.509 127.893   5
   0  -3  30 303.578 232.469   5
   0  -3  31-115.998 159.923   5
   0  -3  31 16.7141 138.484   4
   0   3  31 195.874 166.614   5
   0   3  31 40.7221 191.633   8
   0  -3  32 0.20672 160.711   5
   0   3  32-228.673 219.369   8
   0   3  32 273.199 208.102   5
   0  -3  33 268.704 191.346   5
   0   3  33 643.972 213.490   5
   0   3  33 765.247 274.587   8
   0  -3  34-142.903 159.259   5
   0   3  34 267.849 209.281   8
   0   3  34-118.663 154.125   5
   0  -3  35 915.671 342.240   5
   0   3  35 971.031 278.392   5
   0   3  35 480.761 203.744   8
   0   3  36 64.7221 162.972   5
   0   3  36-63.8867 191.762   8
   0  -3  36 142.611 218.391   5
   0   3  37 173.754 159.644   5
   0   3  37 237.927 196.922   8
   0  -3  37 518.571 249.709   5
   0  -3  38 48.0292 206.297   5
   0   3  38 43.2089 220.196   8
   0   3  38 339.403 193.241   5
   0   3  39 727.798 236.517   5
   0   3  39 587.492 337.169   8
   0  -3  39 830.995 336.126   5
   0   3  40 286.710 188.725   5
   0  -3  40 448.099 264.671   5
   0   3  40-86.6282 181.563   8
   0  -3  41 470.489 252.078   5
   0   3  41 214.735 206.449   8
   0   3  41 419.354 220.607   5
   0   3  42-151.018 212.999   8
   0   3  42-353.242 232.631   5
   0  -3  42 14.5175 198.458   5
   0  -3  43-35.2372 176.100   5
   0   3  43-85.7012 143.475   5
   0   3  43 190.553 208.449   8
   0   3  44-196.001 159.794   5
   0  -3  44 127.333 169.087   5
   0  -4   0 11902.7 551.569   4
   0  -4   0 12284.3 497.691   7
   0  -4   0 12684.7 469.876   9
   0  -4   1 4035.33 198.803   6
   0   4  -1 3934.59 551.683   3
   0  -4  -1 3997.13 302.197   7
   0  -4   1 4679.47 361.674   4
   0  -4   1 4164.67 303.318   7
   0  -4  -1 4164.27 282.400   9
   0  -4  -1 4218.51 362.050  11
   0   4   1 4150.77 591.161   3
   0  -4   1 4304.34 359.416  11
   0  -4   1 4125.02 266.241   9
   0  -4  -2 4513.04 287.697   9
   0  -4   2 4377.02 345.359  11
   0  -4  -2 4235.17 344.606  11
   0  -4   2 4286.57 269.678   9
   0  -4   2 4259.54 290.421   7
   0   4  -2 3910.40 515.770   3
   0  -4   2 4043.37 215.303   6
   0   4   2 3797.17 529.532   3
   0  -4   2 4194.38 338.057   4
   0  -4  -2 4028.17 311.629   7
   0  -4   2 4197.11 296.072   5
   0   4   3 579.715 256.269   3
   0  -4   3 436.299 119.570   4
   0  -4  -3 252.263 111.354   7
   0  -4  -3 202.256 84.7690   9
   0  -4  -3 271.266 123.057  11
   0  -4   3 341.046 110.054  11
   0  -4   3 360.657 89.2578   9
   0   4  -3 651.962 243.878   1
   0  -4   3 520.590 122.413   5
   0  -4   3 271.565 68.0020   6
   0   4  -3 496.025 181.999   3
   0   4   3 583.132 302.625   1
   0  -4  -4 614.599 117.260   9
   0  -4   4 648.746 120.930   9
   0  -4  -4 567.492 162.840   7
   0  -4   4 493.121 101.404   6
   0   4  -4 761.393 275.409   1
   0   4   4 638.103 239.088   1
   0  -4   4 681.810 136.784   4
   0   4  -4 614.477 198.971   3
   0  -4  -4 543.342 162.707  11
   0  -4   4 832.285 164.639   5
   0  -4  -4 861.859 299.174   1
   0   4   4 534.249 266.019   3
   0  -4   5 1227.20 195.148   6
   0   4   5 986.890 389.302   1
   0  -4  -5 1158.73 244.094  11
   0  -4  -5 1139.78 207.007   9
   0  -4  -5 515.548 210.604   7
   0  -4   5 1131.97 210.151   5
   0  -4   5 1045.80 247.795   4
   0   4  -5 1219.72 464.944   1
   0  -4   5 1379.87 189.715   9
   0   4   5 1250.94 187.253  10
   0   4  -5 840.414 335.989   3
   0  -4  -5 1134.24 461.693   1
   0   4  -6 2717.79 499.922   1
   0   4  -6 2408.17 382.462   3
   0  -4  -6 2553.13 289.716  11
   0  -4  -6 2333.59 464.189   1
   0  -4   6 2541.70 249.373   5
   0  -4   6 2489.88 434.604   3
   0  -4   6 2597.68 205.248   6
   0  -4   6 2482.22 263.549   4
   0  -4  -6 2373.25 255.595   7
   0  -4  -6 2673.00 246.668   9
   0  -4  -6 1931.65 140.371   6
   0   4   6 2409.64 464.643   1
   0  -4   6 2518.25 220.942   9
   0   4   6 2253.59 213.533  10
   0  -4  -7 68.1941 170.809   1
   0  -4   7 288.644 115.654   4
   0   4   7 240.433 216.265   1
   0  -4   7 96.9484 79.4122   6
   0   4  -7 177.342 180.032   3
   0  -4   7-122.091 174.807   3
   0  -4   7 23.9694 84.4693   5
   0   4   7-39.2341 114.161  10
   0  -4  -7 114.101 117.974  11
   0  -4  -7 96.3982 103.481   9
   0  -4  -7 61.3020 123.073   7
   0   4   8 1728.58 234.846  10
   0  -4  -8 1583.94 228.465  11
   0  -4   8 1438.26 199.932   4
   0  -4  -8 1454.82 205.036   7
   0   4   8 1257.25 303.220   1
   0   4  -8 1493.38 305.677   3
   0  -4  -8 1642.32 217.902   9
   0  -4  -8 1210.90 307.472   1
   0  -4   8 1687.87 211.635   5
   0  -4   8 1721.99 180.595   6
   0  -4   8 1786.65 384.726   3
   0  -4   9 409.830 125.002   5
   0   4   9 355.908 120.758   8
   0  -4  -9 238.139 123.398  11
   0  -4   9 359.384 196.127   3
   0  -4  -9 254.058 183.614   1
   0   4   9 150.045 95.0073  10
   0  -4   9 359.491 108.481   6
   0   4   9 308.825 166.864   1
   0  -4   9 384.171 119.150   4
   0   4  -9 392.532 146.083   3
   0  -4  -9 318.465 131.705   7
   0   4  10 2981.26 314.497  10
   0  -4  10 3043.97 506.284   3
   0  -4 -10 2913.52 311.186   7
   0  -4  10 3124.67 272.547   6
   0  -4  10 3130.86 309.029   4
   0   4  10 3098.59 534.275   1
   0  -4  10 3283.21 295.196   5
   0  -4 -10 3342.09 606.844   1
   0   4  10 3028.81 262.878   8
   0   4 -10 3407.13 486.942   3
   0  -4 -11 1594.26 210.808   7
   0   4  11 2136.00 447.001   1
   0   4 -11 2289.56 402.348   3
   0  -4  11 1615.54 213.321   5
   0  -4 -11 2149.17 448.969   1
   0  -4  11 1675.24 219.952   6
   0  -4  11 2004.57 405.703   3
   0   4  11 1930.01 224.693   8
   0  -4  11 1905.01 248.407   4
   0   4  11 1635.28 230.256  10
   0  -4 -12 4877.59 704.926   1
   0   4 -12 4436.89 556.586   3
   0   4  12 4616.22 396.850  10
   0   4  12 4495.18 649.416   1
   0  -4  12 4622.51 385.349   4
   0  -4  12 4847.48 356.009   5
   0   4  12 4488.34 336.602   8
   0  -4 -12 4976.71 414.502   7
   0  -4  12 4729.52 623.896   3
   0   4  13 1095.95 174.039   8
   0  -4 -13 784.468 203.913   7
   0   4  13 986.988 201.624  10
   0   4  13 1642.44 420.845   1
   0  -4 -13 1286.76 355.390   1
   0  -4  13 1578.90 364.348   3
   0   4 -13 1334.85 282.961   3
   0  -4  13 1267.46 206.205   4
   0  -4  13 1337.47 218.745   5
   0  -4 -14 213.438 157.648   7
   0  -4  14 556.448 133.162   5
   0  -4  14 427.283 171.612   4
   0  -4  14 498.589 263.974   3
   0   4  14 431.288 180.946  10
   0   4 -14 589.702 230.651   3
   0  -4 -14 385.235 224.844   1
   0   4  14 541.521 143.748   8
   0   4  14 576.380 231.041   1
   0  -4 -15 3476.83 402.898   7
   0   4  15 4030.65 609.469   1
   0  -4 -15 2877.14 566.530   1
   0  -4  15 3251.60 345.415   5
   0   4  15 3134.79 365.284  10
   0   4 -15 3269.17 457.587   3
   0   4  15 3171.22 329.716   8
   0  -4  15 2624.96 490.939   3
   0  -4  15 2578.21 288.398   4
   0   4 -16 1644.01 313.004   3
   0  -4  16 1539.09 369.689   3
   0  -4 -16 1293.11 372.708   1
   0   4  16 2206.01 302.664  10
   0   4  16 1685.18 230.978   8
   0   4  16 2073.99 459.078   1
   0  -4  16 1307.01 204.971   4
   0  -4  16 1552.75 234.461   5
   0  -4 -16 1872.60 301.072   7
   0  -4 -17 2478.99 513.354   1
   0   4  17 2748.98 353.792  10
   0  -4  17 2473.69 326.025   4
   0   4  17 2996.60 524.599   1
   0  -4  17 3006.20 348.355   5
   0  -4 -17 3143.32 390.561   7
   0   4 -17 2912.53 414.166   3
   0   4  17 2791.56 286.540   8
   0  -4  17 2345.69 461.902   3
   0  -4  18 9457.34 593.835   4
   0   4  18 10271.7 641.754  10
   0   4  18 10873.6 1024.71   1
   0   4  18 10648.6 581.406   8
   0   4 -18 9820.09 740.900   3
   0  -4 -18 10027.4 690.621   7
   0  -4  18 9867.53 908.095   3
   0  -4 -18 9647.28 1022.51   1
   0  -4  18 9945.00 600.112   5
   0  -4  19 1628.33 289.327   5
   0   4  19 1842.32 411.658   1
   0   4  19 1685.09 277.301   8
   0  -4  19 1740.40 296.735   4
   0  -4 -19 1330.02 423.936   1
   0  -4 -19 1384.09 300.652   7
   0   4  19 1747.50 294.935  10
   0   4 -19 1491.28 313.928   3
   0  -4  19 1405.96 366.777   3
   0  -4 -20 251.365 180.139   7
   0  -4  20 423.886 159.031   5
   0   4  20 120.833 105.474   8
   0   4  20 438.643 191.700  10
   0  -4  20 238.629 212.601   3
   0  -4  20 274.884 154.470   4
   0   4  21 794.118 238.053  10
   0  -4  21 414.179 181.117   5
   0   4  21 531.616 163.060   8
   0  -4  21 973.415 304.568   3
   0  -4 -21 487.180 198.449   7
   0  -4  21 492.397 183.793   4
   0  -4  22 474.461 167.444   4
   0  -4 -22 255.961 169.905   7
   0  -4  22 525.698 182.243   5
   0   4  22 499.752 204.297  10
   0   4  22 410.197 178.192   8
   0   4  23 739.569 208.915  10
   0   4  23 637.716 177.224   8
   0  -4  23 542.872 173.356   4
   0  -4  23 970.775 246.861   5
   0  -4 -23 782.559 226.133   7
   0   4  24-106.843 112.269   8
   0   4  24 67.2330 160.871  10
   0  -4  24 402.647 209.206   5
   0  -4 -24 176.007 182.947   7
   0  -4  24 50.8065 118.718   4
   0  -4 -25-123.608 168.180   7
   0  -4  25 4.24646 117.447   4
   0   4  25-61.5450 153.119  10
   0  -4  25 52.0037 179.800   5
   0   4  25-102.946 135.440   8
   0   4  26 157.569 148.229   8
   0   4  26 313.783 156.739  10
   0  -4 -26 252.886 184.839   7
   0  -4  26 721.689 230.434   5
   0  -4  26 414.279 161.886   4
   0   4  27 12.7525 133.615  10
   0  -4 -27 390.884 200.558   7
   0  -4  27 593.196 244.068   5
   0   4  27 478.384 193.253   8
   0  -4  27 335.621 165.115   4
   0   4  28 734.399 238.539   8
   0   4  28 674.860 233.019  10
   0  -4  28 824.202 224.892   5
   0  -4  28 625.100 209.718   4
   0   4  29-79.5856 158.653  10
   0   4  29 218.069 178.634   8
   0  -4  29 51.1988 153.607   5
   0  -4  29 121.256 142.800   4
   0  -4  30-147.544 181.970   5
   0   4  30 32.9499 204.317  10
   0  -4  30 23.2249 113.799   4
   0   4  30 1.89314 188.863   8
   0   4  31 266.012 183.745   5
   0  -4  31 109.743 184.458   5
   0   4  31 454.677 200.868   8
   0   4  31 219.982 159.647  10
   0  -4  32 0.22071 177.172   5
   0   4  32 55.6839 211.765   8
   0   4  32-178.445 147.806   5
   0   4  33 713.154 198.981   5
   0   4  33 886.372 301.200   8
   0  -4  33 814.339 291.704   5
   0   4  34 133.237 162.322   8
   0  -4  34 177.365 195.309   5
   0   4  34-90.1078 139.163   5
   0   4  35 95.4863 130.292   5
   0   4  35 44.3969 215.745   8
   0  -4  35 10.8639 176.915   5
   0   4  36-197.054 227.164   8
   0  -4  36-178.108 216.594   5
   0   4  36-81.1646 131.322   5
   0  -4  37-73.0186 226.276   5
   0   4  37-100.131 176.487   8
   0   4  37 186.508 190.406   5
   0  -4  38 134.805 195.012   5
   0   4  38-198.473 169.531   5
   0   4  38-351.053 273.138   8
   0  -4  39-214.281 215.947   5
   0   4  39 183.795 201.058   5
   0   4  39 258.284 200.927   8
   0   4  40-18.1558 187.428   5
   0   4  40-137.430 194.621   8
   0  -4  40 462.326 307.588   5
   0   4  41 666.442 214.172   5
   0   4  41 660.636 199.715   8
   0  -4  41 190.993 223.555   5
   0  -4  42 323.719 209.707   5
   0   4  42 183.722 144.861   5
   0   4  43 457.703 225.089   5
   0  -4  43 44.1946 233.519   5
   0   5   0 134.896 150.779   3
   0  -5   0-242.583 120.985   7
   0  -5   0-72.6054 101.177  11
   0  -5   0-194.746 93.3045   6
   0  -5   0 70.2520 74.1062   9
   0   5   0-114.129 230.317   1
   0  -5  -1-178.098 95.8738   6
   0   5  -1 390.582 239.187   3
   0  -5   1-57.2570 62.9933   6
   0  -5  -1 138.395 87.9020   9
   0   5   1-125.312 208.571   1
   0   5   1-319.069 221.826   3
   0  -5   1-66.0696 100.287   9
   0   5  -1-115.698 261.692   1
   0  -5  -1 98.8634 105.345  11
   0  -5  -1-16.7279 119.134   7
   0  -5   1 140.192 155.964  11
   0  -5   2 1080.60 225.162   4
   0  -5  -2 1077.23 169.793   9
   0   5  -2 1030.28 353.662   3
   0  -5   2 932.468 135.094   6
   0  -5  -2 841.044 108.371   6
   0  -5  -2 931.813 200.568  11
   0  -5   2 945.172 149.387   9
   0   5   2 1083.51 329.402   1
   0   5   2 1201.43 345.133   3
   0   5  -2 1334.44 402.294   1
   0  -5  -2 990.680 197.857   7
   0  -5   2 1003.51 211.916  11
   0   5  -3-184.076 250.396   1
   0  -5  -3 179.593 113.907   9
   0  -5   3 22.8547 91.0242   9
   0  -5  -3 80.8825 118.696  11
   0   5   3-70.3067 247.815   3
   0  -5   3 121.986 120.640  11
   0  -5   3-5.92588 120.920   5
   0  -5   3 50.6383 119.439   4
   0  -5  -3 26.0435 113.856   7
   0  -5   3-44.0235 67.8658   6
   0   5   3-200.167 292.533   1
   0  -5  -3 264.529 89.3311   6
   0   5  -3-9.55324 151.646   3
   0  -5   4 1754.18 265.204  11
   0   5   4 1620.55 394.164   3
   0   5   4 1676.83 452.325   1
   0  -5  -4 1716.19 252.713   7
   0   5  -4 1669.78 484.744   1
   0  -5  -4 1603.81 214.651   9
   0  -5   4 1768.52 241.221   5
   0   5  -4 1268.12 344.325   3
   0  -5   4 1606.77 180.256   6
   0  -5  -4 1437.11 226.082  11
   0  -5   4 1691.88 205.989   9
   0  -5   4 1513.56 233.647   4
   0  -5  -4 1461.99 147.639   6
   0  -5  -5 350.949 82.4604   6
   0  -5   5 365.073 140.456   5
   0  -5   5 479.213 138.052   9
   0  -5   5 342.018 142.193  11
   0   5   5 730.557 367.532   1
   0  -5   5 474.805 175.925   4
   0  -5  -5 406.500 170.783  11
   0  -5   5 420.431 102.499   6
   0  -5  -5 422.506 182.465   7
   0   5  -5 162.534 182.709   1
   0   5   5 595.423 263.913   3
   0  -5  -5 382.033 104.931   9
   0   5  -5 473.538 223.869   3
   0   5   5 540.651 163.506  10
   0  -5  -6 1050.96 227.866  11
   0   5   6 2230.57 514.892   1
   0   5  -6 1245.41 396.419   1
   0   5  -6 1734.12 413.963   3
   0  -5   6 999.174 171.248   9
   0  -5  -6 1042.57 185.177   9
   0   5   6 1598.95 413.778   3
   0  -5   6 1375.13 219.982   5
   0  -5  -6 987.953 130.757   6
   0  -5  -6 1173.53 232.619   7
   0   5   6 744.733 181.804  10
   0  -5   6 1017.61 157.754   6
   0  -5   6 1076.77 235.600   4
   0   5   7 1579.56 431.540   3
   0  -5  -7 1526.65 138.304   6
   0  -5   7 1878.75 263.380   4
   0  -5   7 2062.91 260.253   5
   0   5   7 1854.90 463.726   1
   0  -5   7 1854.37 205.080   6
   0  -5  -7 1632.68 278.560  11
   0  -5  -7 1717.05 247.563   7
   0   5   7 1633.55 203.138   2
   0  -5   7 1724.72 223.259   9
   0  -5  -7 1925.74 250.764   9
   0   5  -7 2134.22 452.074   3
   0   5  -7 1899.93 466.717   1
   0  -5  -7 2323.46 534.043   1
   0   5   7 1375.46 208.481  10
   0  -5  -8 474.978 330.052   1
   0  -5   8 44.4574 125.274   4
   0   5   8 169.483 68.1711   2
   0  -5   8 25.3288 120.903   5
   0   5  -8 143.167 209.985   3
   0  -5  -8 19.6606 88.8304   9
   0   5   8 68.1822 147.172   1
   0  -5  -8-32.6899 76.5116   6
   0  -5   8 35.7335 85.6969   9
   0   5  -8-3.22747 177.057   1
   0  -5  -8 231.965 175.896  11
   0  -5  -8 238.531 135.536   7
   0   5   8 89.2488 121.766  10
   0  -5   8 235.757 94.1358   6
   0  -5  -9 2380.31 340.046  11
   0  -5  -9 3176.48 596.752   1
   0  -5  -9 2481.25 202.834   6
   0   5   9 3060.87 559.035   1
   0   5   9 2597.30 327.910  10
   0  -5   9 2995.22 331.912   4
   0  -5  -9 2391.49 320.198   7
   0  -5   9 2775.79 286.566   6
   0   5  -9 3304.59 521.631   3
   0   5  -9 3622.09 667.005   1
   0  -5   9 2930.06 308.058   5
   0  -5   9 2477.40 250.666   9
   0  -5  10 895.792 377.315   3
   0  -5  10 1404.02 254.736   5
   0   5  10 1125.09 236.424   8
   0  -5 -10 1033.31 254.688  11
   0  -5  10 802.590 242.271   6
   0  -5  10 760.211 239.536   4
   0   5  10 1395.03 281.644  10
   0   5  10 883.248 404.204   1
   0  -5 -10 1178.18 462.462   1
   0   5 -10 1084.98 388.178   3
   0  -5 -10 1873.28 289.871   7
   0   5 -10 1125.13 479.803   1
   0  -5  11 68.1102 102.604   5
   0  -5 -11 12.6261 150.637   7
   0  -5  11 100.137 140.118   4
   0  -5  11-379.709 247.974   3
   0  -5  11 34.5151 122.561   6
   0   5  11-2.76682 108.302   8
   0   5 -11 196.906 221.018   1
   0  -5 -11-61.5279 213.139   1
   0   5 -11-8.69131 167.452   3
   0   5  11-146.776 238.143   1
   0   5  11 156.939 139.843  10
   0  -5  12 2171.04 293.071   5
   0   5 -12 2522.56 428.862   3
   0  -5 -12 1706.10 268.842   7
   0   5  12 2256.30 515.604   1
   0  -5  12 2320.67 311.140   4
   0   5  12 1809.17 256.373   8
   0  -5 -12 3076.74 608.215   1
   0  -5  12 2078.60 442.041   3
   0   5  12 1676.89 276.920  10
   0   5 -13 2036.48 422.377   3
   0   5  13 1884.96 260.813   8
   0   5  13 2443.09 502.359   1
   0  -5  13 2377.36 490.860   3
   0  -5 -13 2204.37 477.455   1
   0  -5  13 2303.42 302.018   5
   0  -5  13 2084.44 312.598   4
   0  -5 -13 2466.19 388.197   7
   0   5  13 1970.00 308.902  10
   0  -5 -14 1438.96 296.038   7
   0  -5 -14 1647.12 422.484   1
   0   5  14 1708.10 489.350   1
   0  -5  14 1349.60 251.647   4
   0   5  14 1675.69 257.602   8
   0  -5  14 1529.32 430.628   3
   0  -5  14 1410.13 245.065   5
   0   5  14 1451.91 274.469  10
   0   5 -14 1165.77 299.475   3
   0  -5  15-42.3056 108.934   4
   0  -5 -15 385.546 274.943   1
   0  -5  15 443.332 268.480   3
   0   5  15 41.4881 132.399  10
   0   5  15 240.490 147.800   8
   0  -5  15 232.143 135.013   5
   0  -5 -15 54.6324 163.405   7
   0   5 -15 1.17034 118.018   3
   0  -5 -16 632.072 223.023   7
   0   5 -16 726.650 226.912   3
   0  -5  16 841.850 185.041   4
   0   5  16 513.519 167.869  10
   0  -5  16 348.213 123.042   5
   0   5  16 639.388 182.868   8
   0  -5  16 516.758 222.432   3
   0  -5  17 251.056 233.497   4
   0  -5  17 120.568 178.228   3
   0  -5  17 652.078 233.827   5
   0  -5 -17 327.956 308.397   7
   0   5  17 118.068 145.189   8
   0   5 -17 177.531 146.479   3
   0   5  17 272.342 174.158  10
   0   5  18 230.404 106.602   8
   0  -5  18 353.537 151.789   5
   0  -5  18 180.155 131.345   3
   0  -5  18 379.854 192.822   4
   0   5  18 343.499 181.887  10
   0  -5 -18 382.777 201.811   7
   0   5  19-91.4832 149.402  10
   0  -5 -19-109.697 215.134   7
   0  -5  19 52.9349 141.873   5
   0  -5  19 62.1693 127.967   4
   0   5  19 19.8034 125.930   8
   0  -5  20 1642.19 284.989   5
   0   5  20 1577.64 266.204   8
   0   5  20 1585.31 328.059  10
   0  -5 -20 1397.92 324.367   7
   0  -5  20 1675.86 321.120   4
   0   5  21 322.181 211.142  10
   0   5  21 273.530 124.750   8
   0  -5  21 496.278 194.729   5
   0  -5  21 646.028 215.129   4
   0  -5 -21 405.184 211.336   7
   0  -5  22 5039.75 504.901   4
   0   5  22 4878.46 471.080   8
   0  -5 -22 4384.77 504.288   7
   0  -5  22 4702.20 495.514   5
   0   5  22 4092.59 497.022  10
   0  -5 -23 598.724 251.478   7
   0  -5  23 800.751 240.144   5
   0  -5  23 451.187 189.000   4
   0   5  23 623.704 206.044   8
   0   5  23 334.396 140.069  10
   0  -5 -24-18.7287 173.912   7
   0  -5  24 53.7309 169.299   4
   0   5  24 140.112 159.664   8
   0   5  24 50.5950 145.978  10
   0  -5  24-67.1521 146.857   5
   0   5  25 326.718 177.911   8
   0  -5  25 188.701 145.621   5
   0  -5  25 120.460 141.281   4
   0  -5 -25 275.046 153.613   7
   0   5  25 38.7575 159.594  10
   0  -5 -26-65.5301 187.285   7
   0  -5  26 111.870 171.741   5
   0  -5  26-175.488 125.237   4
   0   5  26 38.3325 141.929   8
   0   5  26 173.639 179.228  10
   0   5  27 684.242 277.187  10
   0  -5  27 896.973 292.778   5
   0   5  27 846.862 255.897   8
   0  -5  27 963.345 269.580   4
   0  -5  28-188.678 165.728   4
   0  -5  28-112.270 147.068   5
   0   5  28-199.699 229.820  10
   0   5  28 178.456 164.326   8
   0   5  29 774.492 266.684   8
   0  -5  29 1048.90 263.727   4
   0  -5  29 1267.61 327.622   5
   0   5  29 563.771 247.344  10
   0  -5  30 2137.70 451.066   5
   0   5  30 1877.90 414.577  10
   0   5  30 1825.58 352.964   8
   0   5  31 229.847 192.436  10
   0   5  31 398.713 213.743   8
   0  -5  31 377.464 232.224   5
   0   5  32 484.247 254.369   8
   0   5  32 577.999 304.442  10
   0   5  32 381.883 200.926   5
   0  -5  32 398.295 257.797   5
   0   5  33 515.360 292.335   8
   0   5  33 213.944 198.690  10
   0  -5  33 189.568 218.526   5
   0   5  33 374.528 202.886   5
   0   5  34 465.601 210.614   8
   0   5  34 315.544 185.978   5
   0  -5  34 730.211 301.473   5
   0   5  35 416.612 176.606   5
   0   5  35 644.772 299.783   8
   0  -5  35 210.600 224.613   5
   0   5  36 159.616 184.934   8
   0  -5  36 410.093 218.675   5
   0   5  36 357.483 213.933   5
   0  -5  37 318.518 275.056   5
   0   5  37 290.158 195.451   5
   0   5  37 30.7369 180.401   8
   0   5  38 589.276 251.330   8
   0   5  38 916.309 242.138   5
   0  -5  38 492.863 315.920   5
   0  -5  39-317.899 235.797   5
   0   5  39 112.835 181.725   5
   0   5  39 125.763 156.029   8
   0  -5  40 295.468 211.220   5
   0   5  40 323.760 200.320   5
   0   5  40 304.885 166.193   8
   0  -5  41 490.507 258.107   5
   0   5  41-133.889 216.575   5
   0   5  42-138.427 152.846   5
   0  -5  42 311.215 172.885   5
   0  -6   0 550.814 144.101   9
   0   6   0 656.747 319.520   3
   0  -6   0 495.417 117.587   6
   0  -6   0 669.861 199.737  11
   0  -6   1 27.5180 135.672  11
   0   6   1-182.779 180.629   3
   0  -6  -1 172.353 88.1462   6
   0  -6  -1-3.48759 82.1376   9
   0   6  -1-194.079 190.613   3
   0  -6   1-48.8221 91.7856   9
   0  -6   1 34.8322 70.0412   6
   0  -6  -1 151.435 162.966  11
   0  -6   2 261.332 80.4259   6
   0   6   2 672.313 321.079   3
   0  -6   2 333.626 173.884  11
   0  -6  -2 409.182 188.349  11
   0   6  -2 566.680 274.732   3
   0  -6   2 421.126 133.272   9
   0  -6  -2 474.087 155.595   9
   0  -6  -2 625.140 124.841   6
   0  -6  -3 407.436 96.3292   6
   0   6   3 393.849 206.852   3
   0  -6   3 459.126 133.862   9
   0  -6  -3 526.086 165.304   9
   0  -6  -3 419.675 161.094   7
   0  -6  -3 356.862 156.272  11
   0  -6   3 508.646 179.492  11
   0  -6   3 638.854 136.550   6
   0   6  -3 721.110 323.376   3
   0  -6  -4 1162.52 264.481   7
   0  -6   4 1732.62 315.821   4
   0  -6   4 1415.33 192.533   6
   0  -6  -4 1213.10 154.644   6
   0  -6   4 1159.54 267.322  11
   0   6  -4 1622.04 384.289   3
   0  -6  -4 1158.14 257.173  11
   0  -6   4 1349.01 233.365   9
   0  -6  -4 1190.31 235.075   9
   0   6   5 1941.92 312.167  10
   0  -6  -5 2128.97 188.339   6
   0  -6  -5 1828.62 316.447  11
   0  -6  -5 1891.94 286.056   9
   0  -6   5 2109.73 347.235  11
   0  -6   5 2604.52 402.316   4
   0   6  -5 2806.65 548.461   3
   0  -6  -5 2122.37 330.453   7
   0  -6   5 1770.44 245.277   9
   0  -6   5 1974.05 228.964   6
   0  -6   5 2576.77 309.199   5
   0   6   6 318.455 175.496  10
   0   6  -6 158.982 177.751   3
   0  -6   6 520.243 200.684  11
   0  -6   6 500.849 221.244   4
   0  -6  -6 238.740 127.983   9
   0  -6   6 213.904 114.149   9
   0  -6  -6 248.030 171.628   7
   0   6   6 318.253 124.124   2
   0  -6   6 66.3510 104.121   6
   0  -6   6 558.163 194.131   5
   0  -6  -6 334.031 193.484  11
   0  -6   7 1303.36 289.258  11
   0  -6   7 1467.67 213.961   9
   0  -6  -7 1531.95 246.352   9
   0  -6  -7 1652.49 308.821  11
   0  -6  -7 1529.63 288.290   7
   0   6   7 1237.45 242.176  10
   0  -6   7 1178.80 180.666   6
   0  -6   7 1931.69 320.197   4
   0   6  -7 1533.18 384.623   3
   0  -6   7 1639.15 278.466   5
   0  -6   8 3221.89 421.392  11
   0  -6   8 3065.03 311.803   9
   0   6   8 3401.44 386.301  10
   0  -6  -8 3712.09 413.798   7
   0  -6   8 3603.13 309.101   6
   0  -6   8 4100.39 457.383   4
   0  -6   8 4177.90 419.780   5
   0   6  -8 3944.25 584.814   3
   0  -6  -8 3700.85 449.352  11
   0  -6   9 1421.97 232.903   6
   0  -6   9 1837.66 314.769   4
   0  -6   9 1514.58 257.201   5
   0  -6   9 1239.64 201.800   9
   0  -6  -9 1721.43 306.107   7
   0   6   9 1159.39 244.888  10
   0  -6  -9 1049.79 245.538  11
   0   6  -9 1174.26 291.529   3
   0  -6 -10 306.255 220.372   7
   0  -6  10-205.521 151.779   5
   0   6  10 187.233 133.161   8
   0   6 -10 216.604 152.307   3
   0  -6  10 278.312 131.303   9
   0  -6  10 142.774 105.319   6
   0  -6  10 302.924 173.116   4
   0   6  10 333.140 172.181  10
   0  -6 -10 181.378 170.873  11
   0  -6  11 102.663 126.455   9
   0   6  11-153.908 121.070  10
   0   6  11 69.4507 98.0642   8
   0  -6  11 117.953 159.900   5
   0  -6 -11-140.436 197.056   7
   0  -6  11-27.9114 142.820   4
   0  -6  12-158.186 173.958   4
   0   6  12 121.293 166.113  10
   0  -6  12 66.0573 132.245   5
   0  -6  12 3.27593 78.1969   9
   0   6  12 48.5550 136.614   8
   0  -6 -12-145.594 213.885   7
   0  -6  13 608.917 202.778   5
   0  -6  13 524.979 234.245   4
   0   6  13 413.626 189.465  10
   0   6  13 258.208 164.770   8
   0  -6  13 323.449 152.200   9
   0  -6 -13 253.452 234.919   7
   0  -6  14 443.483 198.864   4
   0   6  14 790.879 210.123   8
   0  -6 -14 394.800 204.660   7
   0  -6  14 567.005 158.312   9
   0   6  14 627.489 192.521  10
   0  -6  14 819.248 217.226   5
   0   6  15 3279.97 362.523   8
   0  -6 -15 3805.87 463.482   7
   0  -6  15 3837.30 454.578   4
   0   6  15 3093.67 413.037  10
   0  -6  15 3444.32 406.028   5
   0  -6  16 313.685 184.957   4
   0   6  16 184.743 156.076  10
   0   6  16 228.311 120.056   8
   0  -6  16 259.912 147.794   5
   0  -6 -16 252.552 213.934   7
   0  -6 -17 1057.30 285.782   7
   0   6  17 755.874 226.620  10
   0  -6  17 1488.66 305.876   4
   0   6  17 1060.94 240.538   8
   0  -6  17 1007.14 252.490   5
   0   6  18 566.383 159.378   8
   0   6  18 216.403 144.780  10
   0  -6  18 636.899 224.456   5
   0  -6  18 504.782 184.041   4
   0  -6 -18 438.848 226.343   7
   0   6  19 511.148 192.726   8
   0   6  19 522.741 228.922  10
   0  -6  19 419.623 209.253   4
   0  -6  19 714.235 249.919   5
   0  -6 -19 505.887 245.592   7
   0  -6  20 83.4600 131.745   4
   0  -6  20-170.013 131.632   5
   0   6  20-73.9875 132.991   8
   0  -6 -20 200.618 218.566   7
   0   6  20-20.8065 146.507  10
   0  -6  21 3998.78 472.061   4
   0  -6 -21 3694.62 555.743   7
   0  -6  21 4491.70 512.530   5
   0   6  21 3511.07 502.049  10
   0   6  21 4416.91 469.156   8
   0  -6  22 181.860 139.990   4
   0  -6  22 168.274 183.938   5
   0   6  22 17.6678 165.913  10
   0   6  22 164.708 153.339   8
   0  -6 -22-40.0438 237.754   7
   0   6  23 566.425 161.055   8
   0  -6  23 1044.02 297.671   5
   0  -6 -23 992.623 331.255   7
   0  -6  23 652.562 248.384   4
   0   6  23 426.000 196.808  10
   0   6  24 1303.50 338.962  10
   0  -6  24 1892.53 351.666   4
   0  -6  24 2180.95 374.589   5
   0   6  24 1381.56 268.459   8
   0  -6  25 284.584 208.354   5
   0  -6  25 42.1692 135.321   4
   0   6  25 284.801 202.326  10
   0   6  25 93.0043 177.872   8
   0   6  26 4.36881 139.232   8
   0  -6  26 191.966 127.584   4
   0   6  26 342.927 225.003  10
   0  -6  26 397.414 250.422   5
   0  -6  27 1060.49 319.399   5
   0  -6  27 1067.86 281.636   4
   0   6  27 1103.84 315.396  10
   0   6  27 1150.17 296.043   8
   0  -6  28-8.31008 169.993   4
   0  -6  28-74.7587 157.863   5
   0   6  28-20.5816 161.242  10
   0   6  28 65.4983 210.250   8
   0  -6  29 476.869 236.096   5
   0   6  29 857.787 309.061   8
   0   6  29 837.969 313.641  10
   0  -6  30 260.989 232.572   5
   0   6  30 286.472 226.361  10
   0   6  30 60.4391 175.008   8
   0   6  31 256.108 208.574   8
   0  -6  31 90.7599 183.874   5
   0   6  31-7.44742 201.459  10
   0   6  32 887.048 341.654  10
   0  -6  32 1294.12 398.713   5
   0   6  32 1433.07 356.758   8
   0   6  33 332.853 211.395  10
   0   6  33 284.215 245.732   8
   0   6  33 434.455 192.249   5
   0  -6  33 33.3102 158.982   5
   0   6  34 345.735 254.253  10
   0   6  34-133.694 121.295   5
   0  -6  34-33.1350 184.923   5
   0   6  34 97.9352 159.881   8
   0  -6  35 86.7923 222.720   5
   0   6  35-311.134 213.975   8
   0   6  35 225.011 201.053   5
   0   6  36 380.623 236.057   8
   0   6  36 108.300 168.414   5
   0  -6  36-145.819 245.635   5
   0   6  37 195.301 147.848   5
   0  -6  37 462.787 229.752   5
   0   6  37 129.882 184.502   8
   0  -6  38-258.012 165.017   5
   0   6  38 91.5074 169.645   5
   0   6  38-408.110 226.236   8
   0  -6  39-199.384 212.546   5
   0   6  39-242.194 179.842   5
   0  -6  40 48.4901 237.240   5
   0   6  40 280.639 156.671   5
   0  -7   0 185.249 132.554   9
   0  -7   0-96.5295 135.810  11
   0  -7  -1 85.3218 99.3018   9
   0  -7   1 41.3239 85.0201   9
   0  -7  -1-70.5594 152.929  11
   0  -7   1 156.588 153.081  11
   0  -7  -2 691.092 243.908  11
   0  -7   2 891.737 187.532   9
   0  -7  -2 697.942 158.441   9
   0  -7   2 496.048 236.641  11
   0  -7   3-123.998 113.476   6
   0  -7   3-58.8723 105.289   9
   0  -7  -3-76.4551 123.543   9
   0  -7   3 193.002 183.201  11
   0  -7  -3 340.430 201.874  11
   0  -7   4 218.294 104.528   6
   0  -7  -4 471.103 162.161   9
   0  -7  -4 193.721 139.751  11
   0  -7   4 284.216 107.819   9
   0  -7   4 185.809 132.715  11
   0   7   4 498.382 182.190  10
   0   7   5 355.513 165.431  10
   0  -7   5 215.331 106.288   9
   0  -7   5 233.705 121.262   6
   0  -7  -5 276.644 174.553   9
   0  -7  -5 334.740 197.181  11
   0  -7   5 105.175 132.412  11
   0   7   6 3826.58 444.985  10
   0  -7  -6 3368.36 433.737  11
   0  -7  -6 3779.46 407.520   9
   0  -7   6 3242.56 446.281  11
   0  -7   6 4109.19 327.694   6
   0  -7   6 4063.13 380.270   9
   0  -7   7 80.6724 92.9482   9
   0  -7  -7 240.759 172.698  11
   0  -7   7 312.040 190.431  11
   0   7   7 183.896 168.303  10
   0  -7   7-132.498 160.543   4
   0  -7   7-104.950 132.607   6
   0   7   8 606.286 193.327  10
   0  -7   8 534.050 140.886   6
   0  -7   8 331.045 175.208  11
   0  -7  -8 244.392 137.945  11
   0  -7   8 457.120 156.494   9
   0  -7   8 530.513 222.041   4
   0  -7   8 608.196 215.141   5
   0  -7  -9 54.8097 164.679  11
   0  -7   9 28.0309 165.163  11
   0  -7   9-84.6958 161.241   5
   0  -7   9 114.959 106.983   9
   0  -7   9 263.925 185.966   4
   0   7   9-142.742 214.750  10
   0  -7  10 1618.01 313.592   5
   0   7  10 1416.91 277.217   8
   0  -7 -10 1508.28 321.248  11
   0   7  10 1349.62 276.612  10
   0  -7 -10 916.985 287.309   7
   0  -7  10 1543.52 254.104   9
   0  -7  10 1433.69 314.393   4
   0  -7  10 1014.74 274.372  11
   0  -7  11 28.2892 166.031   5
   0  -7  11 371.469 245.183  11
   0  -7 -11-121.292 201.994   7
   0   7  11 97.5877 131.942   8
   0   7  11-6.93794 134.009  10
   0  -7  11 104.029 101.083   9
   0  -7  11 259.613 175.450   4
   0  -7 -12-78.3607 222.879   7
   0   7  12-10.2857 130.620   8
   0   7  12 205.219 183.727  10
   0  -7  12 221.540 172.355   4
   0  -7  12 253.031 206.321  11
   0  -7  12 228.060 177.011   5
   0  -7  12 148.444 89.8909   9
   0  -7 -13-56.8877 224.677   7
   0  -7  13 173.965 172.433   4
   0  -7  13 296.198 169.093  11
   0   7  13 206.530 110.123   8
   0  -7  13 48.1599 153.115   5
   0   7  13 371.081 180.974  10
   0  -7  13 199.625 116.651   9
   0   7  14 97.1926 147.399  10
   0  -7  14-56.8900 137.605   4
   0   7  14 142.931 177.560   8
   0  -7  14 26.2437 132.647   5
   0  -7  14 182.900 113.693   9
   0  -7 -14 127.047 184.502   7
   0   7  15 664.028 262.718  10
   0  -7  15 250.927 170.186   5
   0  -7 -15 663.250 252.475   7
   0   7  15 336.582 163.199   8
   0  -7  15 442.173 140.912   9
   0  -7  15 1015.45 295.679   4
   0   7  16 897.258 244.071   8
   0   7  16 484.142 223.925  10
   0  -7  16 774.264 153.557   9
   0  -7  16 1181.40 310.537   4
   0  -7  16 896.084 254.344   5
   0  -7  17 3265.19 471.354   4
   0   7  17 3028.14 392.828   8
   0  -7  17 3257.00 460.448   5
   0  -7  17 2845.97 318.650   9
   0   7  17 2896.35 453.166  10
   0  -7  18 2224.08 407.484   5
   0  -7  18 2348.33 404.582   4
   0   7  18 2144.37 346.347   8
   0   7  18 1719.01 367.468  10
   0   7  19 1097.13 312.035  10
   0   7  19 473.415 191.116   8
   0  -7  19 719.410 268.577   5
   0  -7  19 845.286 287.612   4
   0  -7  20 650.728 216.617   4
   0   7  20 980.673 311.643  10
   0   7  20 631.968 223.528   8
   0  -7  20 797.300 266.728   5
   0   7  21 376.048 248.720  10
   0  -7  21 68.4721 153.281   4
   0  -7  21-18.0102 140.286   5
   0   7  21-4.34625 157.343   8
   0  -7  22 33.8693 162.012   5
   0   7  22 103.555 130.457   8
   0   7  22-16.0413 152.513  10
   0  -7  23 781.275 293.931   5
   0   7  23 674.267 244.490   8
   0  -7  23 448.457 212.185   4
   0   7  23 555.081 253.174  10
   0  -7  24 0.21242 172.809   5
   0   7  24 287.244 188.089   8
   0   7  24 71.6448 165.824  10
   0  -7  24 69.5436 141.226   4
   0   7  25-272.476 151.638   8
   0  -7  25 13.9406 149.793   4
   0   7  25 106.742 227.433  10
   0  -7  25 94.1517 182.356   5
   0   7  26-46.1320 175.853   8
   0  -7  26-417.047 222.092   4
   0  -7  26 86.6345 167.504   5
   0   7  26-115.760 211.532  10
   0   7  27 914.182 332.456  10
   0  -7  27 732.727 272.338   5
   0   7  27 1070.92 328.314   8
   0   7  28 781.425 290.326   8
   0   7  28 835.640 295.565  10
   0  -7  28 397.693 188.303   5
   0   7  29 238.514 207.086  10
   0  -7  29 197.636 209.037   5
   0   7  29 340.960 209.878   8
   0   7  30-22.4445 183.145  10
   0   7  30-74.3941 203.022   8
   0  -7  30 166.025 164.235   5
   0   7  31 338.780 300.754  10
   0  -7  31 551.443 295.389   5
   0   7  31 296.482 203.168   8
   0  -7  32 723.594 310.742   5
   0   7  32 478.094 201.491  10
   0   7  32 607.101 299.452   8
   0   7  33-293.320 267.610   8
   0   7  33 84.2815 186.870  10
   0  -7  33 29.1672 180.430   5
   0  -7  34 58.0453 156.066   5
   0   7  34-263.652 188.573  10
   0   7  34 89.1849 128.319   5
   0   7  34-24.9574 185.634   8
   0  -7  35 208.228 309.323   5
   0   7  35 152.834 154.650   8
   0   7  35 211.381 187.294   5
   0   7  35 586.611 293.599  10
   0  -7  36 474.495 225.134   5
   0   7  36 364.782 133.634   5
   0  -7  37 87.7726 236.791   5
   0   7  37 150.299 113.930   5
   0   7  38 227.233 191.963   5
   0  -7  38 343.393 217.509   5
   0  -8   0 429.271 242.663  11
   0  -8   0 353.913 146.054   9
   0  -8  -1-87.8798 144.116  11
   0  -8   1-9.30116 108.082   9
   0  -8  -1-41.9824 141.346   9
   0  -8   1-158.285 192.273  11
   0  -8  -2 75.6078 139.209  11
   0  -8   2-20.3558 142.891  11
   0  -8  -2-144.811 166.995   9
   0  -8   2 115.964 120.382   9
   0   8   2 162.659 165.216  10
   0  -8  -3 1191.16 310.342  11
   0  -8   3 1085.70 335.330  11
   0  -8  -3 1156.91 248.966   9
   0  -8   3 1150.99 232.730   9
   0   8   3 595.216 209.452  10
   0  -8   4 328.258 140.727   9
   0  -8   4 648.789 272.475  11
   0  -8  -4 308.575 196.942  11
   0   8   4 615.410 259.048  10
   0  -8  -4 553.354 187.561   9
   0  -8  -5 6.98226 134.257   9
   0  -8   5 361.330 178.643   9
   0  -8  -5 401.213 238.026  11
   0  -8   5 204.393 188.635  11
   0   8   5 120.533 166.943  10
   0  -8   6-50.0756 96.8973   9
   0   8   6 67.2722 152.535  10
   0  -8   6-19.2510 161.007  11
   0  -8   7 213.832 211.478  11
   0   8   7 389.963 209.577  10
   0  -8   7-36.5613 108.304   9
   0  -8  -7 322.998 245.049  11
   0  -8  -8 568.509 249.498  11
   0   8   8 437.108 219.155  10
   0  -8   8 769.258 187.455   9
   0  -8   8 662.085 313.294  11
   0   8   9 109.578 194.713  10
   0  -8   9 391.793 169.315   9
   0   8   9 485.245 188.944   8
   0  -8  -9 476.963 215.361  11
   0  -8   9 319.347 231.534  11
   0   8  10 2564.91 382.313   8
   0  -8  10 2827.78 365.257   9
   0  -8  10 2689.05 477.424  11
   0   8  10 2527.77 433.491  10
   0  -8  11-174.908 217.117  11
   0   8  11-2.48528 161.774   8
   0  -8  11-57.5219 175.575   4
   0   8  11 53.5262 158.884  10
   0  -8  11 48.0035 136.515   9
   0  -8  12 2631.98 341.903   9
   0   8  12 2750.00 376.510   8
   0  -8  12 3214.90 499.679   4
   0  -8  12 2526.49 500.357  11
   0   8  12 2375.54 402.633  10
   0  -8  12 2813.51 406.102   5
   0  -8  13 138.577 196.992   4
   0   8  13 145.845 122.795   8
   0  -8  13-87.2453 167.813  11
   0   8  13 413.940 210.700  10
   0  -8  13 96.0551 169.169   5
   0  -8  14-164.832 151.823   5
   0   8  14-53.0691 159.001  10
   0  -8  14 344.582 232.446   4
   0  -8  14 169.268 182.441  11
   0   8  14-216.981 179.689   8
   0   8  15-31.7355 159.208  10
   0  -8  15 70.0167 184.773  11
   0   8  15 114.541 151.643   8
   0  -8  15-54.0858 161.807   5
   0  -8  15 374.205 210.289   4
   0   8  16 352.167 194.024   8
   0   8  16-38.7493 195.673  10
   0  -8  16 192.617 209.017  11
   0  -8  16 223.285 200.220   5
   0  -8  16-73.7841 187.632   4
   0  -8  17 311.724 237.347   4
   0  -8  17 331.829 231.301   5
   0   8  17-7.81030 123.468   8
   0   8  17 24.1347 159.904  10
   0  -8  17 364.273 258.894  11
   0  -8  18 868.954 283.886   4
   0   8  18 533.982 199.027   8
   0   8  18 246.980 226.328  10
   0  -8  18 223.008 165.284  11
   0  -8  18 550.591 281.309   5
   0  -8  19 552.919 245.227   5
   0   8  19 218.858 203.104  10
   0  -8  19 258.870 195.332  11
   0   8  19 589.786 223.245   8
   0  -8  19 401.833 302.996   4
   0  -8  20 787.222 317.731  11
   0   8  20 1075.32 315.436  10
   0   8  20 811.297 224.091   8
   0  -8  20 1442.92 350.764   4
   0  -8  20 1126.11 312.999   5
   0   8  21 182.661 187.827  10
   0  -8  21 475.209 266.994  11
   0  -8  21-16.4776 145.263   5
   0  -8  21 377.112 246.250   4
   0   8  21 306.821 188.471   8
   0   8  22-66.3054 150.088   8
   0  -8  22-11.9522 168.345  11
   0  -8  22-197.230 214.996   4
   0   8  22 216.043 222.595  10
   0  -8  22 10.9039 174.720   5
   0  -8  23 185.099 241.243   4
   0   8  23 170.069 186.630   8
   0  -8  23 93.6297 221.724  11
   0  -8  23 70.1701 186.965   5
   0   8  23 8.51034 163.063  10
   0   8  24 154.796 137.733   8
   0   8  24 341.664 286.545  10
   0  -8  24 253.741 191.395   4
   0  -8  24 239.010 229.806   5
   0  -8  24 273.916 192.264  11
   0  -8  25 74.4607 233.001  11
   0   8  25 517.068 231.779  10
   0  -8  25 488.146 250.480   5
   0   8  25-30.7443 200.469   8
   0   8  26 293.817 232.089  10
   0  -8  26-98.9217 175.164   5
   0   8  26 39.2586 188.009   8
   0  -8  27 232.721 239.260   5
   0   8  27 307.715 239.221   8
   0   8  27 115.254 193.467  10
   0   8  28-220.852 260.468  10
   0   8  28 512.301 247.841   8
   0  -8  28 233.120 245.717   5
   0   8  29-252.823 223.307  10
   0  -8  29-192.970 166.596   5
   0   8  29-52.7923 173.630   8
   0  -8  29-153.590 213.864  11
   0   8  30 120.896 261.629  10
   0  -8  30 168.678 227.447   5
   0   8  30 305.563 177.215   8
   0  -8  30 92.0290 203.982  11
   0   8  31 267.761 268.384  10
   0   8  31 104.322 211.079   8
   0  -8  31-122.445 275.831   5
   0  -8  31-242.068 301.276  11
   0   8  32 328.619 155.541   8
   0  -8  32-75.2461 182.478   5
   0  -8  32-435.137 246.009  11
   0   8  32-200.937 193.244  10
   0   8  33 110.944 162.307  10
   0   8  33 222.855 204.464   8
   0  -8  33 262.982 323.020  11
   0  -8  33 50.5121 221.921   5
   0   8  34 210.683 124.485   5
   0   8  34 587.654 278.165  10
   0  -8  34 314.957 165.893   5
   0  -8  34 591.770 313.473  11
   0   8  35 216.465 184.933  10
   0  -8  35-83.4587 186.075  11
   0  -8  35-5.28757 227.460   5
   0   8  35-85.1742 126.034   5
   0  -9   0-40.1988 115.765   9
   0  -9   0 436.535 289.865  11
   0   9   0 273.010 144.280  10
   0   9  -1 192.934 179.660  10
   0   9   1 253.761 185.526  10
   0  -9  -1 426.375 252.042  11
   0  -9  -1 417.154 174.654   9
   0  -9   1 155.415 163.243   9
   0  -9   1 291.055 272.947  11
   0  -9  -2 69.8514 159.994  11
   0   9   2-139.639 194.305  10
   0  -9   2 299.391 238.527  11
   0  -9  -2-79.1535 110.727   9
   0  -9   2 180.081 109.685   9
   0  -9   3 558.369 302.175  11
   0  -9  -3 156.174 193.188  11
   0  -9   3 344.635 189.348   9
   0   9   3 47.8725 158.910  10
   0  -9   4 554.011 281.206  11
   0  -9   4 227.745 129.931   9
   0  -9  -4-103.431 187.349  11
   0   9   4 399.967 245.005  10
   0  -9   5 234.636 105.022   9
   0   9   5 142.648 173.542  10
   0  -9   5 157.967 161.945  11
   0  -9  -5 454.860 221.373  11
   0   9   6 56.0486 194.321  10
   0  -9   6 131.164 185.294  11
   0  -9  -6 273.341 205.708  11
   0  -9   6 250.587 133.360   9
   0   9   7 802.078 289.778  10
   0  -9  -7 772.498 307.336  11
   0  -9   7 941.329 234.060   9
   0  -9   7 689.167 296.320  11
   0   9   8 1440.29 371.504  10
   0  -9  -8 1513.33 410.279  11
   0   9   8 1028.70 244.174   8
   0  -9   8 1163.69 356.107  11
   0  -9  -9 2412.23 457.310  11
   0  -9   9 2275.19 501.876  11
   0   9   9 2257.75 374.351   8
   0   9   9 2362.03 430.965  10
   0  -9  10 644.081 285.613  11
   0   9  10 422.802 235.308  10
   0   9  10 525.766 253.800   8
   0   9  11 283.219 157.078   8
   0  -9  11 63.6155 191.038  11
   0  -9  12 81.2142 211.511  11
   0   9  12 328.639 182.040  10
   0   9  12 376.313 172.452   8
   0   9  13 586.232 217.008   8
   0   9  13 378.515 222.870  10
   0  -9  13 538.132 275.807  11
   0  -9  14 1870.65 447.272  11
   0   9  14 1885.61 417.878  10
   0   9  14 1914.41 355.418   8
   0  -9  15 237.907 235.526  11
   0   9  15 399.385 199.278   8
   0   9  15 304.884 208.105  10
   0   9  16 39.9203 162.322   8
   0   9  16-139.152 197.331  10
   0  -9  16-105.775 237.097  11
   0  -9  17-143.203 188.899  11
   0   9  17 36.5704 158.315  10
   0   9  17 33.4932 137.754   8
   0  -9  18 112.462 187.657  11
   0   9  18 353.012 210.277   8
   0   9  18 318.583 255.387  10
   0  -9  19 198.363 171.962   5
   0  -9  19 93.8250 187.988  11
   0   9  19 165.569 201.126   8
   0   9  19-34.6985 191.509  10
   0  -9  20 324.943 224.509   5
   0  -9  20-74.6106 239.331  11
   0   9  20-308.450 183.121   8
   0   9  20-68.4128 172.823  10
   0  -9  21 359.523 208.147   5
   0   9  21 386.602 213.367   8
   0  -9  21 361.994 284.559  11
   0   9  21 140.582 254.034  10
   0   9  22 21.6034 202.686  10
   0  -9  22 300.908 257.201  11
   0  -9  22 311.987 234.292   5
   0   9  22-262.577 183.669   8
   0   9  23 301.220 147.399   8
   0  -9  23 783.636 318.994   5
   0  -9  23 700.084 346.150  11
   0   9  23 751.459 314.049  10
   0  -9  24 165.287 177.143  11
   0   9  24 115.737 148.647   8
   0  -9  24-174.580 155.879   5
   0   9  24 84.2542 209.114  10
   0   9  25 603.939 286.330  10
   0  -9  25 475.994 215.944   5
   0   9  25 162.281 142.854   8
   0   9  26 104.687 178.647   8
   0  -9  26 388.486 253.006   5
   0   9  26-68.0469 192.015  10
   0  -9  27 190.910 195.078   5
   0   9  27 716.206 258.241   8
   0   9  27 106.850 216.343  10
   0  -9  27 178.503 215.262  11
   0  -9  28-127.571 188.673  11
   0   9  28 4.37073 200.788   8
   0   9  28-380.212 228.998  10
   0  -9  28-305.765 245.294   5
   0  -9  29 56.9779 163.715   5
   0   9  29-142.779 232.356  10
   0  -9  29 148.857 232.278  11
   0   9  29 2.10200 141.797   8
   0  -9  30 430.936 181.857   5
   0   9  30-12.8721 125.524   8
   0   9  30-245.341 256.969  10
   0  -9  30-78.5134 163.704  11
   0   9  31 86.6932 152.979  10
   0  -9  31 52.3930 168.978  11
   0  -9  31-37.6510 166.867   5
   0  -9  32-118.808 162.898  11
   0   9  32 445.587 220.102  10
   0  -9  32 388.064 189.869   5
   0 -10   0 323.997 214.635  11
   0  10   0 3.42615 187.560  10
   0 -10   1 252.412 274.469  11
   0 -10  -1-214.200 210.356  11
   0  10   1-64.5180 168.921  10
   0  10  -1 112.324 166.925  10
   0 -10  -2-68.0868 197.335  11
   0 -10   2 142.266 210.563  11
   0  10   2-0.24228 161.247  10
   0  10  -2 126.897 169.636  10
   0  10  -3 670.808 307.167  10
   0 -10   3 460.729 313.446  11
   0 -10  -3 745.665 334.088  11
   0  10   3 380.276 255.733  10
   0  10  -4 457.857 283.173  10
   0 -10   4 528.875 297.183  11
   0  10   4 219.327 229.927  10
   0 -10  -4 268.416 174.609  11
   0  10   5 180.085 254.725  10
   0 -10   5 59.7834 193.032  11
   0 -10  -5 198.892 178.557  11
   0 -10   6 160.224 197.547  11
   0  10   6 200.852 200.654   8
   0  10   6 156.651 205.718  10
   0 -10  -6-27.4485 186.168  11
   0 -10  -7 440.165 325.924  11
   0  10   7 175.112 177.248  10
   0 -10   7 526.726 293.770  11
   0  10   7 37.1073 165.070   8
   0  10   8 297.450 165.701   8
   0  10   8 205.640 220.160  10
   0 -10   8-13.7374 246.645  11
   0  10   9 1.39184 152.561   8
   0 -10   9-267.299 305.618  11
   0  10   9 72.0278 164.144  10
   0  10  10 469.090 225.438  10
   0  10  10 268.672 193.199   8
   0 -10  10 690.519 338.355  11
   0 -10  11-25.2073 260.466  11
   0  10  11 241.448 192.508   8
   0  10  11 38.2566 166.303  10
   0  10  12 105.479 172.021  10
   0 -10  12 194.985 238.868  11
   0  10  12 290.176 225.718   8
   0  10  13 51.9862 183.303  10
   0  10  13-59.7196 164.631   8
   0 -10  13-20.6021 211.568  11
   0  10  14 321.753 256.435  10
   0 -10  14-185.366 223.274  11
   0  10  14-1.77461 153.211   8
   0 -10  15 593.180 358.515  11
   0  10  15 669.921 314.265  10
   0  10  15 105.201 145.362   8
   0 -10  16 599.604 311.441  11
   0  10  16 333.782 239.523  10
   0  10  16 189.331 173.968   8
   0  10  17 209.620 215.342  10
   0  10  17 202.784 185.110   8
   0 -10  17-162.828 257.750  11
   0  10  18 290.588 256.972  10
   0 -10  18 77.0327 215.297  11
   0  10  18 569.552 238.001   8
   0  10  19-266.695 248.968  10
   0  10  19-57.0629 153.148   8
   0 -10  19-23.1779 212.094  11
   0  10  20-23.1197 180.007   8
   0 -10  20 52.2295 197.727  11
   0  10  20-476.501 265.784  10
   0 -10  21 99.7920 209.356  11
   0  10  21-23.1944 172.192   8
   0  10  21-232.548 188.879  10
   0 -10  22 147.806 283.193  11
   0  10  22 547.363 314.619  10
   0  10  22 325.485 193.745   8
   0  10  23 475.154 249.930  10
   0 -10  23 245.010 214.780  11
   0  10  23 712.420 241.407   8
   0 -10  24-45.9684 165.990  11
   0  10  24 155.909 157.812  10
   0  10  24 29.3618 120.193   8
   0  10  25 169.282 142.086   8
   0  10  25-152.366 226.872  10
   0 -10  25-317.534 226.514  11
   0  10  26-29.5711 183.802  10
   0 -10  26 341.451 254.595  11
   0  10  26 408.143 213.404   8
   0 -10  27 69.1844 206.917  11
   0  10  27-41.0972 192.177  10
   0  10  28 121.775 190.867  10
   0 -10  28-67.8349 165.324  11
   0 -11   0 116.379 213.679  11
   0  11   0 265.307 280.982  10
   0  11   1 120.099 254.787  10
   0  11  -1 557.317 285.903  10
   0 -11  -1 176.922 244.250  11
   0 -11   1 174.656 258.551  11
   0  11   2 238.016 212.588  10
   0 -11  -2 207.455 250.136  11
   0  11  -2 290.624 247.403  10
   0 -11   2 361.387 246.938  11
   0 -11   3 215.812 260.050  11
   0 -11  -3-10.9176 232.313  11
   0  11   3 86.9613 201.476  10
   0  11  -3-265.578 208.859  10
   0 -11  -4 158.932 243.685  11
   0 -11   4 271.047 227.621  11
   0  11  -4 247.751 172.380  10
   0  11   4 26.0471 151.813   8
   0  11   4 188.258 195.713  10
   0  11  -5 55.4921 206.424  10
   0 -11   5 510.081 362.872  11
   0 -11  -5-92.8295 211.778  11
   0  11   5 495.887 268.472   8
   0  11   5-9.35155 174.274  10
   0  11  -6 530.507 209.070  10
   0  11   6 147.088 177.692   8
   0 -11   6 385.469 240.125  11
   0  11   6 777.117 312.082  10
   0  11  -7 354.759 223.018  10
   0  11   7-305.909 231.937   8
   0 -11   7 154.095 259.935  11
   0  11   7-227.205 237.682  10
   0  11   8 542.556 237.521   8
   0 -11   8 708.851 355.375  11
   0  11   8 432.015 239.922  10
   0  11  -8 382.477 316.562  10
   0  11   9 211.192 204.539  10
   0  11   9 84.0989 166.165   8
   0 -11   9-79.9980 184.351  11
   0  11  -9 11.7192 232.989  10
   0 -11  10 207.764 275.280  11
   0  11 -10-108.755 167.250  10
   0  11  10-96.0201 211.087  10
   0  11  10 0.20959 149.948   8
   0  11  11 394.348 232.247  10
   0 -11  11 193.620 259.481  11
   0  11  11 235.986 178.629   8
   0  11  12 243.672 189.517   8
   0  11  12-32.3642 181.569  10
   0  11  13 352.417 228.126  10
   0  11  13 442.642 236.541   8
   0 -11  13 37.4661 233.635  11
   0  11  14-254.438 230.098  10
   0 -11  14-314.123 316.284  11
   0  11  14 108.508 180.913   8
   0  11  15 103.687 191.320  10
   0  11  15 480.645 220.326   8
   0 -11  15-208.511 279.783  11
   0  11  16 210.562 171.759  10
   0  11  16-203.883 179.247   8
   0 -11  16 507.843 280.154  11
   0  11  17 229.423 143.090   8
   0 -11  17 112.432 237.564  11
   0  11  17 172.563 201.803  10
   0  11  18-67.5363 180.567  10
   0  11  18 249.868 167.760   8
   0 -11  18-130.781 234.221  11
   0 -11  19-60.9711 224.241  11
   0  11  19-79.2003 216.552  10
   0  11  19-140.927 136.008   8
   0 -11  20 224.830 204.843  11
   0  11  20 406.454 168.100   8
   0  11  20 343.761 214.936  10
   0  11  21 587.237 207.889   8
   0  11  21 172.861 178.978  10
   0 -11  21 293.055 270.414  11
   0  11  22-262.374 188.372  10
   0  11  22 66.5509 127.760   8
   0 -11  22-138.640 256.730  11
   0 -11  23 176.678 164.066  11
   0  11  23 238.097 186.782  10
   0 -12   0 208.693 270.233  11
   0  12   0-173.222 156.226  10
   0  12  -1-90.7770 235.342  10
   0 -12   1-16.4212 231.366  11
   0 -12  -1 244.058 264.805  11
   0  12   1-326.530 244.931  10
   0  12   1 14.3684 177.290   8
   0 -12   2 84.2436 225.687  11
   0  12   2 11.1272 169.022  10
   0  12  -2 121.050 196.077  10
   0 -12  -2 111.667 234.621  11
   0  12   2 202.293 198.681   8
   0  12  -3 57.9766 189.270  10
   0  12   3-228.330 246.419  10
   0 -12   3-91.1248 235.180  11
   0  12   3-42.0965 160.511   8
   0 -12   4 213.210 273.624  11
   0  12  -4-307.762 190.935  10
   0  12   4-3.49337 177.662   8
   0  12   4-286.028 238.091  10
   0  12   5 289.964 250.460  10
   0 -12   5 445.036 316.093  11
   0  12   5 255.085 184.818   8
   0  12  -5 38.4072 166.787  10
   0  12  -6 19.1185 168.172  10
   0 -12   6 70.2409 216.966  11
   0  12   6-11.7123 168.691  10
   0  12   6-35.4182 162.608   8
   0 -12   7 685.041 355.476  11
   0  12  -7 606.214 246.966  10
   0  12   7-260.247 226.414  10
   0  12   7 729.523 242.225   8
   0  12   8-238.307 193.918   8
   0 -12   8 208.673 278.671  11
   0  12   8-399.130 175.229  10
   0  12  -8 153.012 209.525  10
   0  12   9 364.339 192.375   8
   0 -12   9-8.85587 213.840  11
   0  12  -9 368.497 220.060  10
   0  12   9 495.885 239.319  10
   0  12  10 310.845 175.411   8
   0  12  10 56.3241 157.819  10
   0 -12  10 6.44612 250.168  11
   0  12  11-29.3242 140.578   8
   0  12  11 36.1199 168.242  10
   0 -12  11 375.496 364.331  11
   0  12  12-203.324 166.465   8
   0 -12  12 80.6793 204.028  11
   0  12  12 142.210 153.009  10
   0  12  13-102.581 173.615   8
   0  12  13 20.3754 157.287  10
   0  12  14 18.2624 158.069  10
   0  12  14-41.1710 123.545   8
   0 -12  14-337.487 265.510  11
   0  12  15-145.302 132.480   8
   0 -12  15-112.042 198.979  11
   0  12  15 315.042 190.565  10
   0 -12  16-11.7379 203.593  11
   0  12  16 417.388 216.844  10
  -1   0  46-40.4750 166.285   5
  -1   0  45 189.402 189.690   5
  -1   0  44 144.878 187.954   8
  -1   0  44-15.0777 210.319   5
  -1   0  43 239.789 216.546   5
  -1   0  43 319.616 170.283   8
  -1   0  42 24.9946 217.725   5
  -1   0  42 318.158 296.317   8
  -1   0  41-245.542 218.390   8
  -1   0  41-207.660 207.700   5
  -1   0  40-20.0860 178.931   5
  -1   0  40-238.497 178.824   8
  -1   0  39-295.350 208.941   5
  -1   0  39-227.226 264.712   8
  -1   0  38 416.109 231.356   5
  -1   0  38 94.4178 241.657   8
  -1   0  37-187.852 175.167   5
  -1   0  37 134.566 247.653   8
  -1   0  36 299.691 232.657   5
  -1   0  36 288.513 223.023   8
  -1   0  35 240.825 174.289   5
  -1   0  35-10.1963 159.283   8
  -1   0  34 318.138 224.069   5
  -1   0  34 179.629 204.971   8
  -1   0  33 0.16898 150.292   5
  -1   0  33 328.262 222.773   8
  -1   0  32 2124.07 323.814   4
  -1   0  32 1799.81 338.588   5
  -1   0  32 1453.54 369.400   8
  -1   0  31 106.985 133.281   4
  -1   0  31 89.6332 194.616   5
  -1   0  31-138.462 218.014   8
  -1   0  30 1125.79 262.055   8
  -1   0  30 1342.44 275.989   5
  -1   0  29-68.2492 117.561   5
  -1   0  29-330.430 159.428   8
  -1   0  28 1093.23 233.727   5
  -1   0  28 1068.74 249.893   8
  -1   0  27 178.874 136.089   5
  -1   0  27-54.7953 143.738   8
  -1   0  26 65.3178 130.043   8
  -1   0  26 292.760 155.479   5
  -1   0  25-306.587 200.666   8
   1   0 -25 18.8305 116.843   1
  -1   0  25 39.4921 134.712   3
  -1   0  25-49.7786 95.2350   5
  -1   0  24 1563.42 382.770   3
  -1   0  24 2853.03 354.869   5
   1   0 -24 1565.91 416.404   1
  -1   0  24 2658.32 466.776   8
   1   0 -23-320.851 168.409   1
  -1   0  23-184.800 121.963   5
  -1   0  23-10.7527 134.264   3
  -1   0  23-51.9143 136.086   8
  -1   0  22 208.443 173.932   3
  -1   0  22 681.923 189.190   5
   1   0 -22 370.793 242.789   1
  -1   0  22 278.143 190.502   8
   1   0 -21-101.203 127.451   1
  -1   0  21 91.0244 103.419   5
  -1   0  21-114.475 130.164   8
  -1   0  21-295.315 219.003   3
   1   0 -20 2528.68 436.030   1
  -1   0  20 2574.70 275.318   5
  -1   0  20 2469.40 391.280   3
  -1   0  20 2983.94 324.751   8
  -1   0  19-169.615 102.572   5
  -1   0  19 303.665 149.226   8
   1   0 -19-8.38894 165.248   1
  -1   0  19 68.9943 136.031   3
  -1   0  18 9422.61 510.887   8
  -1   0  18 8545.35 738.170   3
   1   0 -18 10270.3 820.459   1
  -1   0  18 8692.80 430.854   5
  -1   0  17-36.7587 96.5327   8
  -1   0  17-48.4430 77.9575   5
  -1   0  17-86.4846 99.6095   3
   1   0 -17-54.0810 132.809   1
  -1   0  16 33162.4 864.620   8
  -1   0  16 30971.4 726.123   5
  -1   0  16 29701.4 1225.50   3
   1   0 -16 32028.3 1347.25   1
  -1   0  15-51.2144 109.370   3
  -1   0  15-17.6653 93.4831   8
   1   0 -15-67.3720 198.787   1
  -1   0  15-1.26812 68.6205   5
   1   0 -14 1157.76 250.298   1
  -1   0  14 1284.55 245.966   3
  -1   0  13 33.1239 117.471   3
   1   0 -13-242.642 156.665   1
   1   0 -12 132457. 2413.49   1
  -1   0  12 127811. 2171.39   3
   1   0 -11 11.2503 150.470   1
  -1   0  11-20.1825 123.082   3
  -1   0  10 79.9078 96.1185   3
   1   0 -10 113.233 156.846   1
   1   0  -9 280.773 194.353   1
   1   0  -8 54309.5 1318.94   1
   1   0  -7-288.874 173.209   1
   1   0  -6 12798.6 581.697   1
   1   0  -5-188.999 121.271   1
   1   0  -4 1645.54 223.630   1
   1   0   3 26.8328 48.3402   2
  -1   0  -4 93.0296 36.9913   1
  -1   0  -5-182.386 125.395   2
  -1   0  -5-30.9994 48.3860   1
  -1   0  -6 2805.13 280.467   2
  -1   0  -6 3028.30 208.727   1
  -1   0  -7-93.1509 117.929   1
  -1   0  -8 14822.2 567.781   1
  -1   0  -9 50.0524 99.3201   1
  -1   0 -10 4217.86 375.553   1
   1   0  10 4802.07 238.990  10
   1   0  10 4481.68 237.043   8
  -1   0 -11 75.1727 137.725   1
   1   0  11-0.04466 89.9268   8
   1   0  11 39.5110 78.8560  10
   1   0  12 8873.25 363.219   8
   1   0  12 8971.96 353.803  10
   1   0  13-71.3953 98.4753  10
   1   0  13-63.6422 81.8898   8
   1   0  13 22.7172 80.2419   3
  -1   0 -13 178.458 145.459   1
   1   0  14 4129.89 302.314   8
   1   0  14 4315.80 408.897   3
  -1   0 -14 5075.29 477.436   1
   1   0  14 4164.20 261.744   5
   1   0  14 4227.73 299.999  10
   1   0  15-9.17975 85.0014   3
   1   0  15-164.462 100.146   5
   1   0  15-40.1453 84.3063   8
  -1   0 -15-103.279 111.435   1
  -1   0 -15-53.5058 62.5571   7
  -1   0 -15 150.147 143.471   2
  -1   0 -16 776.842 247.251   2
   1   0  16 747.643 119.978   5
   1   0  16 859.443 201.908   3
  -1   0 -16 759.075 224.870   1
  -1   0 -16 1090.43 127.701   7
   1   0  16 887.901 155.125   8
   1   0  17-179.516 99.9350   5
  -1   0 -17 98.7682 120.702   2
  -1   0 -17-150.413 152.194   1
  -1   0 -17-96.5948 81.3937   7
   1   0  17 6.98467 85.0435   8
   1   0  17-89.9262 92.0689   3
   1   0  18 99.0859 91.5539   8
   1   0  18-19.4631 122.129   3
  -1   0 -18 95.6096 62.1479   7
  -1   0 -18-36.2496 106.684   1
   1   0  18 257.941 99.9459   5
  -1   0 -18 57.8622 108.632   2
   1   0  19-52.5847 100.990   3
  -1   0 -19 27.1343 117.176   1
  -1   0 -19-69.9097 79.1320   7
   1   0  19-19.4409 97.6621   5
  -1   0 -19-82.5552 123.781   2
   1   0  19-36.1974 96.9159   8
   1   0  20 1291.15 283.685   3
  -1   0 -20 1222.33 320.152   2
  -1   0 -20 1816.56 339.859   1
   1   0  20 1655.14 231.214   5
   1   0  20 1874.53 262.953   8
  -1   0 -21 74.4279 110.957   1
   1   0  21-76.1429 112.789   8
   1   0  21 63.6567 114.865   3
  -1   0 -21-58.1183 127.878   2
   1   0  21 115.073 107.733   5
   1   0  22 780.856 187.905   8
   1   0  22 819.226 203.876   3
   1   0  22 1034.32 211.557   5
  -1   0 -22 814.158 260.155   2
  -1   0 -22 880.620 245.797   1
   1   0  23-6.30286 90.6793   3
   1   0  23-36.4183 114.917   8
  -1   0 -23 295.727 186.757   1
  -1   0 -23 223.551 185.965   2
   1   0  23 68.9133 112.055   5
   1   0  24 797.836 231.045   3
  -1   0 -24 845.487 261.260   1
   1   0  24 491.587 165.232   8
   1   0  24 733.167 160.860   5
   1   0  25-43.0038 130.103   8
   1   0  25 17.8219 98.8862   5
   1   0  26-27.8534 125.843   8
   1   0  26 5.88662 129.863   5
   1   0  27 24.9858 104.051   5
   1   0  27 43.5851 143.192   8
   1   0  28 413.885 202.164   8
   1   0  28-116.135 120.986   5
   1   0  29 35.6055 117.982   5
   1   0  29-53.9178 186.556   8
   1   0  30 609.923 186.803   5
   1   0  30 982.397 267.437   8
   1   0  31 30.7695 161.336   8
   1   0  31 43.0454 131.321   5
   1   0  31-73.4867 125.228   4
   1   0  32 502.267 192.570   5
   1   0  32 583.006 215.396   4
   1   0  32 805.119 279.116   8
   1   0  33-79.9722 217.284   5
   1   0  33-148.259 164.698   4
   1   0  33-323.158 193.195   8
   1   0  34 60.1698 170.635   8
   1   0  34 112.664 161.121   4
   1   0  34-24.0116 134.772   5
   1   0  35 208.783 214.532   8
   1   0  35 13.3582 141.118   4
   1   0  35 0.19961 151.600   5
   1   0  36 51.0583 145.188   5
   1   0  36-255.693 190.529   4
   1   0  36 78.3296 156.553   8
   1   0  37 35.0281 146.381   4
   1   0  37 290.221 233.587   8
   1   0  37-102.987 199.381   5
   1   0  38 20.0640 171.224   8
   1   0  38 248.204 201.888   5
   1   0  39 181.151 193.690   8
   1   0  39 30.6012 168.327   5
   1   0  40-172.054 155.689   8
   1   0  40 210.499 157.818   5
   1   0  41 22.5107 177.154   5
   1   0  41-335.678 208.073   8
   1   0  42-112.199 231.876   5
   1   0  43-181.456 187.511   5
   1   0  44 526.072 256.539   5
   1   0  45-212.755 254.578   5
  -1  -1  46 175.614 163.016   5
  -1   1  46 273.496 183.854   5
  -1   1  45-57.4237 186.844   8
  -1  -1  45 192.432 296.954   5
  -1   1  45-185.500 194.947   5
  -1   1  44-222.462 244.831   8
  -1   1  44-109.269 222.009   5
  -1  -1  44 104.184 182.193   5
  -1   1  43 106.356 175.218   5
  -1  -1  43-124.768 163.630   5
  -1   1  43-269.791 193.496   8
  -1   1  42 65.0347 198.553   5
  -1   1  42 25.1661 205.520   8
  -1  -1  42 346.329 283.620   5
  -1   1  41-20.6358 211.533   8
  -1   1  41 118.617 152.549   5
  -1  -1  41 231.925 209.086   8
  -1  -1  41 180.367 188.729   5
  -1  -1  40 452.843 258.422   8
  -1   1  40 385.101 194.128   5
  -1   1  40 423.942 250.402   8
  -1   1  39-144.583 199.899   8
  -1   1  39-115.363 172.417   5
  -1  -1  39 150.109 213.764   5
  -1  -1  39-25.1696 195.737   8
  -1  -1  38 319.432 251.067   8
  -1  -1  38 0.22575 162.696   5
  -1   1  38-19.8176 242.792   8
  -1   1  38 157.200 159.332   5
  -1  -1  37 138.920 230.346   5
  -1   1  37 477.884 193.584   5
  -1   1  37 131.595 187.065   8
  -1  -1  37 379.974 253.377   8
  -1  -1  36 499.602 200.170   8
  -1   1  36 798.080 305.073   5
  -1  -1  36 1239.04 334.564   5
  -1   1  36 571.878 230.227   8
  -1   1  35 138.797 189.403   8
  -1  -1  35 151.435 171.289   5
  -1   1  35-230.129 167.544   5
  -1  -1  35 194.753 234.230   8
  -1   1  34 128.011 171.999   8
  -1  -1  34-6.65456 167.063   5
  -1   1  34 21.0753 162.813   5
  -1  -1  34-19.7089 209.631   8
  -1  -1  33 157.548 184.453   8
  -1   1  33 88.3666 139.021   5
  -1   1  33 381.410 253.446   8
  -1  -1  33 363.147 190.503   5
  -1   1  32 1.07524 151.773   5
  -1  -1  32 243.646 161.434   5
  -1   1  32 99.1013 157.806   8
  -1  -1  32 346.505 228.324   8
  -1   1  31 127.086 156.076   8
  -1  -1  31 11.4411 119.023   4
  -1   1  31-46.4835 121.258   5
  -1  -1  31-245.433 179.920   5
  -1  -1  31-15.8804 170.041   8
  -1  -1  30 0.15441 130.055   5
  -1   1  30 0.13681 141.892   5
  -1  -1  30 94.8036 121.268   4
  -1   1  30 66.3828 179.302   8
  -1  -1  30 191.756 194.096   8
  -1  -1  29-42.9643 115.000   5
  -1  -1  29 21.1148 84.7677   4
  -1  -1  29 166.929 153.741   8
  -1   1  29 237.456 174.783   8
  -1   1  29 177.467 135.251   5
  -1  -1  28 2266.53 298.726   4
  -1   1  28 2171.88 306.376   5
  -1  -1  28 1927.81 330.864   8
  -1   1  28 2180.53 340.846   8
  -1  -1  28 2301.10 342.886   5
  -1  -1  27 1376.99 259.670   5
  -1  -1  27 999.742 276.415   8
  -1   1  27 1151.59 224.368   5
  -1  -1  27 1607.51 258.881   4
  -1   1  27 1339.10 315.818   8
  -1  -1  26 486.320 174.686   5
  -1  -1  26 341.452 145.728   8
  -1  -1  26 615.044 170.883   4
  -1   1  26 276.435 116.516   5
  -1   1  26 587.639 219.447   8
  -1  -1  25-68.1530 102.882   4
  -1  -1  25 274.293 214.230   3
  -1   1  25 385.292 210.259   8
  -1  -1  25 226.816 150.407   5
   1  -1 -25 329.869 185.168   1
   1   1 -25 313.913 196.558   1
  -1   1  25 59.9586 97.7462   5
  -1  -1  25 177.740 145.264   8
   1  -1 -24 2473.74 466.895   1
  -1  -1  24 2242.21 262.366   4
  -1   1  24 2386.69 285.990   5
  -1  -1  24 2581.07 321.747   5
   1   1 -24 2101.57 428.747   1
  -1   1  24 2286.37 403.974   3
  -1  -1  24 2190.63 402.750   3
  -1  -1  24 2458.33 333.606   8
  -1   1  24 2593.92 337.434   8
  -1  -1  23 278.085 126.782   5
   1  -1 -23 561.666 229.354   1
   1   1 -23 292.182 161.722   1
  -1   1  23 246.843 133.765   8
  -1  -1  23-68.1705 92.4881   4
  -1  -1  23 222.960 190.660   3
  -1   1  23 167.433 84.9838   5
  -1  -1  23 232.882 132.486   8
  -1   1  23 310.053 228.141   3
   1  -1 -22 446.638 150.145   7
   1  -1 -22 567.057 212.558   1
   1  -1 -22 1319.37 273.612   2
  -1  -1  22 951.360 207.447   5
  -1  -1  22 574.451 221.780   8
  -1  -1  22 769.156 283.048   3
   1   1 -22 1040.53 325.999   1
  -1   1  22 563.561 254.318   8
  -1   1  22 1115.47 214.326   5
  -1   1  22 759.828 262.965   3
  -1  -1  22 845.196 185.196   4
  -1   1  21 1064.75 244.810   3
   1   1 -21 1587.52 336.470   1
  -1  -1  21 1330.29 257.064   8
  -1  -1  21 1008.27 274.579   3
  -1   1  21 1186.45 210.026  10
  -1   1  21 1238.50 194.461   5
  -1   1  21 1347.35 222.302   8
  -1  -1  21 1361.59 192.626   4
   1  -1 -21 1298.36 338.651   1
   1  -1 -21 1007.31 154.888   7
  -1  -1  21 1409.95 216.461   5
   1  -1 -20 26.5900 203.713   1
   1   1 -20-123.083 180.571   1
  -1   1  20 301.927 144.726  10
  -1  -1  20-29.8857 120.014   3
   1  -1 -20-93.0147 80.7724   7
  -1  -1  20 28.3229 119.974   8
  -1  -1  20 24.5153 101.023   5
  -1   1  20-121.531 133.650   8
  -1   1  20 3.66161 83.5071   5
  -1  -1  19 1060.68 192.970   5
  -1  -1  19 908.637 296.938   3
  -1   1  19 1330.24 230.821   8
   1   1 -19 669.057 288.451   1
  -1  -1  19 991.887 226.987   8
   1  -1 -19 841.814 141.405   7
   1  -1 -19 984.107 359.931   1
  -1   1  19 1347.58 235.259  10
  -1   1  18 5357.96 416.294  10
   1   1 -18 5639.14 639.906   1
  -1   1  18 5923.79 404.562   8
  -1  -1  18 5996.71 618.480   3
   1  -1 -18 5693.21 320.063   7
   1  -1 -18 6272.07 672.474   1
  -1  -1  18 6007.40 425.996   8
  -1  -1  18 6121.71 380.686   5
   1  -1 -17 3694.47 249.663   7
   1  -1 -17 4174.45 556.713   1
  -1   1  17 3781.54 322.235  10
  -1  -1  17 3723.02 288.257   5
   1   1 -17 3661.61 499.716   1
  -1  -1  17 3729.35 488.658   3
  -1  -1  17 3570.59 326.201   8
  -1   1  17 3410.70 301.631   8
  -1  -1  16 93.0201 81.4829   5
  -1  -1  16 214.938 188.315   3
  -1  -1  16 225.678 121.371   8
  -1   1  16 200.843 123.275  10
   1   1 -16-107.499 150.174   1
  -1   1  16-20.4731 109.176   8
   1  -1 -16 73.8641 92.6677   7
   1  -1 -16 315.523 201.174   1
   1  -1 -15 141.094 100.043   7
  -1  -1  15 549.277 223.620   3
  -1   1  15 67.8536 132.470   8
  -1   1  15 458.164 172.627  10
  -1  -1  15 451.316 181.929   8
  -1  -1  15 114.703 81.4280   5
   1  -1 -15 225.411 168.590   1
   1  -1 -14 7678.33 363.630   7
  -1  -1  14 7681.46 652.545   3
   1  -1 -14 9163.15 750.508   1
  -1   1  14 9777.93 459.048   8
   1  -1 -13 5397.86 266.581   7
  -1   1  13 5534.75 566.926   1
   1  -1 -13 6734.53 617.044   1
  -1  -1  13 6371.74 578.249   3
  -1   1  12 19289.4 1006.82   1
  -1  -1  12 19065.3 936.315   3
   1  -1 -12 20630.2 1017.90   1
  -1   1  11 12180.2 765.954   1
  -1  -1  11 12230.2 723.537   3
   1  -1 -11 12882.5 787.236   1
   1  -1 -10 20044.6 977.040   1
   1   1 -10 18247.3 761.801   3
  -1   1  10 19233.9 966.984   1
  -1  -1  10 18388.6 879.024   3
   1  -1  -9 11170.4 682.454   1
  -1  -1   9 10090.9 601.838   3
   1   1  -9 10388.1 543.796   3
   1  -1  -8 887.735 227.379   1
   1   1  -8 1357.56 248.776   3
   1   1  -7 5215.30 381.123   3
   1  -1  -7 5022.62 433.043   1
   1  -1  -6 13826.4 673.478   1
   1   1  -6 13790.7 597.797   3
   1   1  -5 2640.99 256.551   3
   1  -1  -5 2863.61 305.294   1
   1   1  -4 12604.5 525.936   3
   1  -1  -4 11200.0 545.695   1
   1  -1  -3 577.933 62.4634   2
   1   1  -3 589.739 96.7811   3
   1  -1  -3 555.205 117.426   1
   1   1  -2 19942.9 623.719   3
   1  -1  -2 19422.5 667.613   1
   1  -1  -2 19247.1 444.425   2
   1  -1  -1 4480.21 307.753   1
   1   1  -1 4407.50 283.570   3
   1  -1   0 827.175 129.274   1
   1   1   0 863.237 138.411   3
   1  -1   1 201.019 62.6651   1
   1   1   1 235.024 62.4647   3
  -1   1  -1 306.514 75.0853   3
   1  -1   2 1755.39 153.705   3
  -1   1  -2 1697.22 154.809   3
  -1  -1  -2 1585.43 180.906   1
  -1  -1  -3 62.6663 86.9945   1
  -1   1  -3 218.101 64.8475   3
   1  -1   3-36.4890 86.6076   3
  -1   1  -4 28791.1 652.407   3
   1   1   4 28362.2 807.423   1
   1  -1   4 26759.4 671.411   3
   1   1   4 27857.8 567.409   2
  -1  -1  -5 336.833 131.721   1
  -1   1  -5 497.781 113.320   3
   1   1   5 503.151 100.554   2
   1   1   5 555.315 139.806   1
   1  -1   5 559.262 122.519   3
  -1  -1  -6 8497.67 502.405   1
  -1   1  -6 8560.14 365.668   3
   1  -1   6 8076.07 392.605   3
   1   1   6 8344.33 468.769   1
   1  -1   7 913.066 195.584   3
  -1   1  -7 665.273 143.244   3
  -1  -1  -7 599.265 156.112   2
   1   1   7 648.602 209.653   1
  -1  -1  -7 616.428 211.858   1
  -1  -1  -8 8029.28 519.105   1
  -1  -1  -8 7444.83 380.411   2
   1  -1   8 7498.22 415.706   3
   1   1   8 7607.75 467.287   1
   1   1   9 7201.30 489.614   1
   1   1   9 6899.83 299.376  10
  -1  -1  -9 7038.95 505.305   1
  -1  -1  -9 7101.85 392.103   2
   1  -1   9 6775.06 317.658   8
   1  -1   9 7601.26 430.869   3
  -1  -1 -10 1192.62 262.720   1
  -1  -1 -10 1185.42 194.549   2
   1  -1  10 1399.31 238.169   3
   1   1  10 901.700 149.070  10
   1  -1  10 1054.13 159.643   8
   1   1  10 941.282 133.213   8
   1   1  10 1160.17 221.337   1
   1   1  11 20758.4 556.656  10
   1  -1  11 22279.8 836.731   3
  -1  -1 -11 19978.5 514.455   7
  -1  -1 -11 22063.3 941.557   1
  -1  -1 -11 21219.2 754.159   2
   1   1  11 21868.0 507.465   8
   1  -1  11 20346.5 570.098   8
   1   1  11 20480.0 900.364   1
   1   1  12 1861.50 191.631  10
  -1  -1 -12 1902.39 183.309   7
  -1  -1 -12 1814.91 257.158   2
   1   1  12 1892.03 168.954   8
   1  -1  12 1822.53 274.859   3
   1  -1  12 1875.95 192.870   8
   1   1  12 1469.84 246.802   1
  -1  -1 -12 1921.64 314.020   1
  -1  -1 -13 63.8467 104.747   7
   1   1  13 130.198 129.257   8
   1  -1  13 407.995 181.135   8
   1  -1  13 621.260 168.654   5
   1   1  13 361.307 150.564  10
   1  -1  13 652.811 214.319   3
  -1  -1 -13 541.773 263.729   1
  -1  -1 -13 723.873 217.010   2
   1   1  14 2602.99 216.474   8
  -1  -1 -14 2976.20 398.591   1
   1   1  14 2923.74 257.161  10
  -1  -1 -14 2722.95 318.863   2
   1  -1  14 3096.28 253.864   5
   1  -1  14 2502.23 236.704   8
   1  -1  14 2712.47 345.705   3
  -1  -1 -14 2488.96 215.359   7
   1   1  15 1825.82 231.971  10
   1  -1  15 2179.16 338.747   3
  -1  -1 -15 2246.30 361.836   1
  -1   1 -15 1824.10 317.868   1
   1  -1  15 1824.26 218.117   8
  -1  -1 -15 2067.47 209.475   7
   1  -1  15 2301.79 227.663   5
   1   1  15 1689.57 218.117   8
  -1  -1 -15 2072.98 290.930   2
  -1  -1 -16 133.726 143.285   1
   1   1  16 176.250 112.695  10
   1   1  16 88.7673 114.415   8
   1  -1  16 254.975 103.119   5
   1  -1  16 296.965 127.255   8
   1  -1  16 139.213 106.505   3
  -1  -1 -16 187.578 98.4421   2
  -1   1 -16 35.4576 142.463   1
  -1  -1 -16 53.0601 81.4119   7
   1   1  17 1098.69 181.292  10
   1  -1  17 1258.21 202.476   8
  -1  -1 -17 1010.72 146.201   7
  -1   1 -17 867.404 231.862   1
   1   1  17 1095.47 193.238   8
  -1  -1 -17 784.457 199.826   2
  -1  -1 -17 991.099 268.613   1
   1  -1  17 984.929 238.185   3
   1  -1  17 1169.55 179.635   5
  -1  -1 -18 1820.60 207.757   7
   1   1  18 1761.18 227.126  10
   1  -1  18 2064.14 263.748   8
   1   1  18 2065.68 246.610   8
   1  -1  18 2287.83 246.717   5
  -1  -1 -18 2488.38 346.050   2
   1  -1  18 2253.59 350.484   3
  -1  -1 -18 2116.39 365.432   1
  -1   1 -18 2606.52 376.133   1
  -1  -1 -19 113.679 94.0425   7
   1   1  19 27.6708 112.088   8
   1  -1  19 148.006 103.416   3
  -1   1 -19 149.006 143.124   1
   1   1  19-123.277 119.356  10
  -1  -1 -19 35.1979 103.773   2
  -1  -1 -19 60.8074 146.914   1
   1  -1  19-17.5253 111.368   8
   1  -1  19-177.688 125.011   5
   1   1  20 635.710 166.470   8
  -1  -1 -20 1141.81 242.398   2
  -1  -1 -20 891.368 242.178   1
   1  -1  20 725.739 218.319   3
   1  -1  20 911.288 165.606   5
  -1   1 -20 1098.06 270.271   1
   1   1  20 682.784 182.498  10
  -1  -1 -20 657.844 143.842   7
   1  -1  20 783.253 195.558   8
  -1   1 -21-66.1968 101.212   1
  -1   1 -21-90.4818 150.383   2
   1  -1  21 125.934 111.198   8
  -1  -1 -21-1.05187 120.617   1
   1   1  21-74.2069 98.1376   5
   1  -1  21 93.5501 123.829   3
  -1  -1 -21 246.178 151.010   2
  -1  -1 -21 85.8034 147.667   7
   1   1  21-14.4461 119.987   8
   1   1  21 177.719 157.087  10
   1  -1  21 85.3937 100.126   5
  -1  -1 -22 519.110 123.138   7
   1  -1  22 559.031 205.317   3
   1  -1  22 575.742 160.641   8
   1   1  22 531.232 171.540  10
   1   1  22 733.035 195.344   8
  -1  -1 -22 635.752 180.969   2
  -1  -1 -22 346.274 171.371   1
   1   1  22 752.841 267.853   3
   1  -1  22 609.576 153.427   5
  -1   1 -22 485.551 144.227   2
  -1   1 -22 413.379 194.695   1
   1   1  22 671.930 173.309   5
   1  -1  23 304.196 136.224   5
   1  -1  23 459.290 183.203   3
  -1  -1 -23 157.768 172.154   1
  -1   1 -23-116.076 188.491   2
   1   1  23 503.214 149.198   5
   1   1  23 425.106 195.345   8
  -1   1 -23 79.1808 96.6195   1
   1  -1  23 329.008 111.899   4
   1   1  23 258.082 152.719   3
   1  -1  23 549.004 182.751   8
  -1  -1 -23 333.086 120.410   7
   1  -1  24 209.363 127.211   5
   1   1  24 87.1056 90.1426   5
   1   1  24 348.857 167.362   8
   1  -1  24 390.137 196.897   3
  -1   1 -24 216.558 118.326   1
   1  -1  24 159.295 116.959   8
   1  -1  24 121.747 99.5142   4
   1   1  24 3.07465 86.6994   3
  -1   1 -24 129.156 115.684   2
   1   1  25 178.392 147.753   8
   1  -1  25 354.904 141.604   5
   1  -1  25 186.305 122.645   4
   1   1  25 282.798 135.105   5
   1  -1  25 144.458 176.151   8
   1  -1  26 483.219 169.534   4
   1  -1  26 181.412 115.881   5
   1   1  26 395.582 177.958   8
   1  -1  26 368.496 166.194   8
   1   1  26 433.397 158.954   5
   1  -1  27 553.723 180.000   8
   1  -1  27 339.754 155.739   5
   1   1  27 490.518 160.834   8
   1   1  27 499.141 175.203   5
   1  -1  27 214.721 133.572   4
   1   1  28 621.298 193.616   5
   1  -1  28 497.166 206.569   8
   1  -1  28 265.960 148.144   4
   1   1  28 664.149 204.490   8
   1  -1  28 553.062 187.558   5
   1  -1  29 385.773 172.341   5
   1   1  29 553.686 213.690   8
   1   1  29 510.773 226.286   5
   1  -1  29 520.325 202.947   4
   1  -1  29 145.640 137.209   8
   1  -1  30-48.5164 150.705   5
   1   1  30 49.5171 145.865   5
   1   1  30-64.3456 157.097   8
   1  -1  30 71.1491 142.024   8
   1  -1  30-42.2078 151.132   4
   1   1  31 971.103 280.307   8
   1  -1  31 713.635 225.665   8
   1  -1  31 733.616 228.469   4
   1  -1  31 761.101 273.231   5
   1   1  31 766.226 222.036   5
   1  -1  32-97.6149 168.404   8
   1  -1  32 199.145 179.357   4
   1   1  32-179.053 175.843   5
   1  -1  32-225.065 199.521   5
   1   1  32 37.0845 160.588   8
   1   1  33 1325.44 316.179   5
   1  -1  33 1032.02 297.833   5
   1  -1  33 1292.51 321.736   8
   1   1  33 943.100 231.827   8
   1  -1  33 1076.49 275.199   4
   1   1  34-277.865 202.633   8
   1  -1  34-279.008 214.413   4
   1   1  34 140.633 172.189   5
   1  -1  34-125.483 190.801   8
   1  -1  34-50.0117 165.824   5
   1  -1  35 764.371 289.822   5
   1  -1  35 747.534 269.596   8
   1   1  35 739.896 275.274   8
   1  -1  35 594.352 160.160   4
   1   1  35 968.917 295.169   5
   1   1  36 431.648 216.231   4
   1  -1  36 480.034 165.819   8
   1  -1  36 591.128 289.424   5
   1   1  36 484.924 205.364   5
   1  -1  36 295.092 167.283   4
   1   1  36 565.621 295.361   8
   1   1  37 149.234 196.914   8
   1   1  37 114.807 160.918   4
   1   1  37 43.8642 152.669   5
   1  -1  37 76.6816 201.063   8
   1  -1  37-18.5384 166.275   5
   1   1  38 52.6895 163.218   8
   1   1  38 360.401 229.840   5
   1  -1  38-129.140 198.452   5
   1   1  38 365.446 192.051   4
   1   1  39 453.812 260.177   5
   1  -1  39 508.686 260.810   5
   1   1  39 220.936 171.743   8
   1   1  40 403.387 217.219   8
   1  -1  40 412.847 224.380   5
   1   1  40 618.703 257.992   5
   1   1  41 181.632 172.206   8
   1  -1  41-367.632 194.282   5
   1   1  41 286.150 221.825   5
   1   1  42-9.81956 151.073   8
   1  -1  42-296.781 207.550   5
   1   1  42 2.19551 160.273   5
   1   1  43-375.109 226.093   8
   1  -1  43 234.646 228.105   5
   1   1  43 296.283 216.473   5
   1   1  44 83.2136 151.733   5
   1  -1  44 199.697 190.393   5
   1  -1  45-778.568 321.154   5
   1   1  45-139.297 147.687   5
  -1  -2  45-132.054 234.528   5
  -1   2  45-45.1538 190.317   8
  -1   2  45 262.311 164.584   5
  -1  -2  44-184.846 223.776   5
  -1   2  44-128.847 162.457   5
  -1   2  44 102.567 183.717   8
  -1  -2  43 750.220 289.254   5
  -1   2  43 444.310 224.334   5
  -1   2  43 278.235 239.399   8
  -1   2  42 552.638 268.330   8
  -1   2  42 50.3332 152.503   5
  -1  -2  42 214.939 245.915   5
  -1   2  41 334.675 245.526   8
  -1   2  41-196.628 224.806   5
  -1  -2  41-228.230 167.178   5
  -1   2  40-195.179 175.115   5
  -1   2  40 128.390 214.628   8
  -1  -2  40 77.4109 222.569   5
  -1   2  39 39.8546 195.510   8
  -1  -2  39 338.435 280.743   5
  -1   2  39-299.040 208.006   5
  -1   2  38-167.177 148.248   5
  -1  -2  38 91.2845 277.245   5
  -1   2  38-96.0050 220.656   8
  -1  -2  37 112.127 166.454   5
  -1   2  37 33.9932 153.152   5
  -1   2  37 180.733 182.421   8
  -1   2  36 548.448 262.267   8
  -1  -2  36 210.531 211.407   5
  -1   2  36 426.962 207.092   5
  -1  -2  36 144.743 169.724   8
  -1  -2  35 420.913 220.542   5
  -1   2  35-32.6782 229.974   8
  -1   2  35-212.052 164.062   5
  -1  -2  35 63.6109 172.528   8
  -1  -2  34-212.139 173.317   5
  -1   2  34 184.832 193.715   5
  -1   2  34-279.748 182.801   8
  -1  -2  34-81.6800 180.572   8
  -1  -2  33 374.418 232.108   5
  -1   2  33 229.690 209.595   8
  -1   2  33 249.033 193.131   5
  -1  -2  33 374.008 228.059   8
  -1  -2  32-303.109 231.331   8
  -1   2  32 101.802 181.449   8
  -1  -2  32-72.9993 185.017   5
  -1   2  32 131.482 131.205   5
  -1   2  31 363.652 214.314   8
  -1  -2  31 433.279 203.428   8
  -1   2  31 676.609 202.767   5
  -1  -2  31 584.986 211.672   5
  -1  -2  30 238.734 180.510   5
  -1  -2  30 34.1752 180.272   8
  -1   2  30 85.9704 107.616   5
  -1   2  30 560.356 229.927   8
  -1  -2  30 62.2660 99.6684   4
  -1  -2  29 219.896 136.653   4
  -1  -2  29 105.660 141.518   8
  -1   2  29-28.4231 125.996   5
  -1   2  29-45.2478 140.474   8
  -1  -2  29 27.8966 185.180   5
  -1   2  28 859.011 193.585   5
  -1  -2  28 639.373 150.680   4
  -1   2  28 750.463 253.968   8
  -1  -2  28 993.313 265.912   8
  -1  -2  28 796.210 242.797   5
  -1  -2  27 254.585 156.170   8
  -1   2  27 203.356 119.513   5
  -1   2  27 487.165 196.670   8
  -1  -2  27 641.901 230.734   5
  -1  -2  27 696.948 194.150   4
  -1   2  26 454.403 195.976   8
  -1  -2  26 293.116 117.265   4
  -1   2  26 252.573 122.645   5
  -1  -2  26 33.5195 159.106   8
  -1  -2  26 354.171 166.816   5
  -1   2  25 140.959 108.594   5
  -1   2  25 184.379 121.384  10
  -1  -2  25 472.027 172.550   4
  -1  -2  25 469.466 203.177   8
  -1   2  25 457.023 185.160   8
  -1  -2  25 113.349 112.406   5
  -1  -2  24 1653.83 261.592   5
  -1   2  24 1649.76 303.084   8
  -1  -2  24 832.856 261.382   3
  -1   2  24 1583.84 284.500  10
   1  -2 -24 1785.90 441.016   1
  -1  -2  24 1549.52 244.724   4
   1  -2 -24 1271.99 185.689   7
  -1  -2  24 1458.30 272.005   8
   1   2 -24 1466.82 370.760   1
   1  -2 -23 175.918 126.770   1
  -1   2  23 529.756 167.509  10
  -1  -2  23 544.434 175.167   8
  -1  -2  23 750.860 201.575   5
   1  -2 -23 271.973 131.342   7
   1   2 -23 333.297 170.213   1
  -1  -2  23 224.961 128.622   4
  -1  -2  23 317.166 178.535   3
  -1   2  23 489.634 190.290   8
  -1   2  22 281.302 145.786  10
   1  -2 -22-75.1312 154.666   1
  -1  -2  22 74.5887 125.290   3
   1   2 -22-30.5378 153.064   1
  -1  -2  22 81.5066 120.207   5
  -1  -2  22 77.6606 123.387   8
   1  -2 -22 26.2645 127.658   7
  -1   2  22 153.856 168.340   8
  -1  -2  22 12.7316 88.7560   4
  -1  -2  21 772.549 203.359   8
  -1   2  21 968.766 234.503  10
   1  -2 -21 744.370 316.289   1
  -1  -2  21 631.942 237.817   3
   1  -2 -21 850.447 198.164   7
  -1   2  21 703.196 198.235   8
  -1  -2  21 589.231 148.434   4
  -1  -2  21 613.568 165.172   5
  -1  -2  20 989.457 230.576   8
  -1  -2  20 1110.37 306.046   3
  -1  -2  20 850.768 166.203   4
  -1   2  20 996.021 183.769   8
   1  -2 -20 936.148 308.353   1
   1  -2 -20 986.986 191.873   7
  -1  -2  20 1024.55 187.012   5
  -1   2  20 1061.19 218.022  10
   1  -2 -20 1118.41 152.738   2
  -1  -2  19 803.311 212.998   8
   1  -2 -19 412.034 127.428   7
   1  -2 -19 593.772 217.115   1
   1  -2 -19 670.368 125.196   2
  -1   2  19 673.891 173.755  10
  -1  -2  19 731.380 269.840   3
  -1  -2  19 729.159 147.100   5
  -1   2  19 669.328 152.222   8
  -1  -2  19 594.262 136.510   4
  -1   2  18 596.655 147.315  10
  -1   2  18 1056.32 384.674   1
  -1  -2  18 927.441 271.989   3
  -1   2  18 635.804 164.428   8
  -1  -2  18 780.085 192.359   8
   1  -2 -18 789.669 193.204   7
  -1  -2  18 296.428 116.967   4
   1  -2 -18 652.559 259.456   1
   1  -2 -18 655.654 117.818   2
  -1  -2  18 704.020 150.255   5
  -1  -2  17 5077.91 326.657   4
   1  -2 -17 4606.16 290.514   2
  -1   2  17 5744.34 378.169   8
  -1  -2  17 5868.40 628.457   3
  -1  -2  17 5556.72 373.580   5
   1  -2 -17 5786.70 708.262   1
  -1  -2  17 5621.71 394.956   8
   1  -2 -17 5322.30 379.066   7
  -1   2  17 5748.00 678.640   1
  -1   2  17 4991.29 373.933  10
  -1   2  16 823.119 240.921   1
  -1   2  16 1021.16 174.784   8
  -1  -2  16 582.873 123.371   8
   1  -2 -16 824.751 181.827   7
   1  -2 -16 741.081 113.918   2
  -1   2  16 720.885 149.400  10
  -1  -2  16 1301.46 338.923   3
  -1  -2  16 799.615 151.756   5
   1  -2 -16 729.150 273.324   1
  -1  -2  16 903.287 145.100   4
   1  -2 -15 3595.72 568.771   1
   1  -2 -15 2210.02 179.926   2
  -1  -2  15 2782.76 252.096   8
  -1  -2  15 3017.72 256.006   5
  -1   2  15 3334.69 273.314   8
   1  -2 -15 3176.84 281.986   7
  -1  -2  15 3497.59 473.640   3
  -1   2  15 3144.53 482.992   1
  -1   2  15 2647.12 252.094  10
  -1  -2  15 3124.89 238.542   4
   1  -2 -14 6336.84 710.600   1
  -1  -2  14 6060.27 603.510   3
  -1  -2  14 5597.05 351.494   8
  -1   2  14 5713.00 352.237  10
   1  -2 -14 6017.24 383.349   7
   1   2 -14 6111.99 522.024   3
  -1   2  14 6562.19 677.154   1
  -1   2  14 6191.30 349.475   8
  -1  -2  14 5685.44 306.457   4
  -1  -2  14 6503.01 358.303   5
   1   2 -13 395.238 185.848   3
  -1  -2  13 588.372 258.896   3
  -1   2  13 265.875 143.151   8
   1  -2 -13 123.723 205.083   1
  -1  -2  13 251.388 97.9382   4
  -1   2  13 466.152 231.851   1
   1  -2 -13 309.529 120.881   7
  -1   2  12 149.884 108.686   8
   1   2 -12 72.8618 111.481   3
  -1  -2  12 51.0350 53.8248   4
   1  -2 -12-180.126 148.339   1
  -1  -2  12 148.385 161.049   3
  -1   2  12 49.4926 154.870   1
   1  -2 -12 121.747 114.842   7
  -1   2  11 4661.47 513.484   1
  -1  -2  11 4260.11 462.670   3
   1  -2 -11 4803.85 545.411   1
  -1  -2  11 4530.60 244.791   4
   1   2 -11 4622.57 448.699   3
   1  -2 -11 5567.77 332.396   7
   1   2 -10 5392.43 487.455   3
  -1   2  10 5473.68 569.690   1
  -1  -2  10 5082.89 252.957   4
  -1  -2  10 5698.34 532.321   3
   1  -2 -10 5152.52 319.553   7
   1  -2 -10 5495.50 618.923   1
   1   2  -9 4542.59 434.795   3
   1  -2  -9 4554.85 519.290   1
  -1  -2   9 4195.64 445.279   3
  -1   2   9 4835.14 497.486   1
   1  -2  -9 3884.47 270.657   7
  -1  -2   8 74.1996 138.891   3
   1   2  -8-78.3269 177.589   3
   1  -2  -8 255.997 148.241   1
   1  -2  -8 285.769 150.612   7
  -1  -2   7 74.6017 145.440   3
   1  -2  -7-306.576 239.856   1
   1   2  -7 143.398 135.212   3
   1  -2  -6 3082.85 436.471   1
   1   2  -6 2983.61 357.557   3
   1   2  -5 7740.40 579.942   3
   1  -2  -5 7711.46 709.672   1
  -1   2   5 7155.22 270.870   2
   1  -2  -4 6592.70 578.979   1
   1   2  -4 6512.19 500.886   3
  -1   2   4 6418.95 296.998   2
   1   2  -3 13090.3 699.693   3
  -1   2   3 14021.2 481.958   2
   1  -2  -3 13957.7 779.422   1
   1  -2  -2 3122.40 397.338   1
   1   2  -2 2597.25 332.114   3
   1  -2  -1 7468.71 684.593   1
   1   2  -1 6856.69 514.806   3
   1  -2   0 1581.72 317.065   1
   1   2   0 1411.92 273.118   3
   1   2   1 65261.7 1592.73   3
  -1   2  -1 63643.5 1445.71   3
  -1  -2  -2 986.526 274.473   1
  -1   2  -2 607.429 236.834   3
   1   2   2 808.812 268.118   3
  -1   2  -3 2701.56 338.816   3
  -1  -2  -3 2763.79 398.368   1
   1   2   3 2745.62 397.911   1
   1  -2   3 3183.42 370.572   3
  -1   2  -3 2580.70 429.633   1
  -1  -2  -4 1302.26 374.375   1
   1   2   4 1520.34 364.476   1
  -1   2  -4 1887.57 304.556   3
   1  -2   4 1189.81 338.859   3
  -1  -2  -5 4814.43 601.175   1
   1  -2   5 4256.29 551.832   3
   1   2   6 3100.14 196.250   2
   1  -2   6 3425.52 358.159   3
   1  -2   6 3553.30 192.114   5
  -1  -2  -6 3216.17 398.475   1
  -1   2  -6 3363.07 319.710   3
   1  -2   6 3176.58 207.804   4
   1   2   6 3424.28 392.973   1
   1   2   7-13.3129 130.841   1
   1  -2   7 128.272 62.6227   5
   1  -2   7 87.2493 116.563   3
  -1  -2  -7 215.360 146.445   1
  -1   2  -7 25.6594 117.835   3
   1  -2   7 138.015 74.0048   4
   1   2   7 124.349 65.1574   2
  -1   2  -8 287.425 114.565   3
   1  -2   8 178.115 106.720   3
   1  -2   8 170.355 75.6054   4
   1  -2   8 322.883 77.2378   5
  -1  -2  -8 245.670 98.0147   7
  -1  -2  -8 258.511 182.430   1
   1   2   8 250.169 66.0606   8
   1   2   8 247.332 122.087   1
   1  -2   9 486.702 100.443   4
  -1   2  -9 561.406 126.103   3
   1   2   9 597.383 206.705   1
  -1  -2  -9 456.793 146.352   7
   1   2   9 283.446 81.5180   8
   1  -2   9 615.890 178.527   3
  -1  -2  -9 315.595 164.346   1
   1  -2   9 646.164 106.133   5
   1   2  10 4336.66 231.202   8
  -1   2 -10 4453.64 365.244   3
  -1  -2 -10 3873.91 272.752   7
   1  -2  10 3967.93 420.306   3
  -1  -2 -10 4114.65 465.065   1
   1  -2  10 4005.26 266.784   4
   1   2  10 4150.58 289.579  10
   1   2  10 4418.03 467.937   1
   1  -2  10 4333.11 257.802   5
   1   2  11 1112.22 249.852   1
   1  -2  11 1032.40 142.403   4
  -1   2 -11 1277.31 210.792   3
   1   2  11 662.740 147.734  10
   1  -2  11 1019.43 234.742   3
   1   2  11 917.335 131.723   8
  -1  -2 -11 1065.63 153.531   7
  -1  -2 -11 876.743 258.575   1
   1  -2  11 981.691 139.956   5
   1  -2  11 773.270 143.473   8
   1  -2  12 7094.34 342.995   5
   1   2  12 6575.48 590.527   1
  -1  -2 -12 7043.79 686.297   1
  -1  -2 -12 6543.07 371.991   7
   1  -2  12 5842.66 372.284   8
  -1   2 -12 6835.33 481.903   3
   1   2  12 6873.48 321.134   8
   1   2  12 6753.45 384.867  10
   1  -2  12 6406.50 532.678   3
   1  -2  12 6737.67 372.019   4
  -1  -2 -13 74.4618 89.8679   7
   1   2  13 230.147 94.7250   8
   1  -2  13 319.475 109.576   4
  -1  -2 -13 295.954 197.944   1
   1   2  13 111.737 95.8645  10
   1  -2  13 315.132 127.264   5
   1  -2  13 323.273 165.437   3
   1   2  13 432.616 230.591   1
   1  -2  13 108.796 139.209   8
   1  -2  14 2107.42 239.281   8
   1  -2  14 2469.03 239.350   5
   1   2  14 2020.25 235.117  10
   1   2  14 2681.96 394.270   1
   1  -2  14 2105.61 329.609   3
  -1  -2 -14 2140.20 230.577   7
   1  -2  14 2195.60 233.290   4
  -1  -2 -14 2162.79 392.634   1
   1   2  14 2686.89 219.218   8
   1  -2  15 1576.20 205.334   4
   1  -2  15 1322.18 263.439   3
   1   2  15 1764.16 337.069   1
   1   2  15 1667.97 181.893   8
   1  -2  15 1511.87 215.361   8
   1   2  15 1659.42 213.235  10
  -1  -2 -15 1458.19 329.825   1
   1  -2  15 1788.70 204.763   5
  -1  -2 -15 1625.39 225.971   7
   1  -2  16 232.260 113.521   4
   1   2  16 102.348 111.432  10
   1   2  16 380.947 187.188   1
   1   2  16 286.663 110.383   8
   1  -2  16 257.159 156.997   3
   1  -2  16 295.846 109.489   5
   1  -2  16 204.330 114.495   8
  -1  -2 -16 460.019 145.959   7
  -1  -2 -16 241.668 186.513   1
   1  -2  17 1143.91 177.375   5
  -1  -2 -17 966.113 190.055   7
   1  -2  17 704.350 175.539   8
   1   2  17 848.806 166.464   8
   1   2  17 784.565 170.451  10
   1  -2  17 1057.69 264.160   3
   1   2  17 1065.39 287.601   1
   1  -2  17 986.783 190.698   4
  -1  -2 -17 1245.26 332.177   1
   1  -2  18-26.8803 97.6887   3
   1  -2  18 23.9195 107.663   8
   1  -2  18 180.839 123.596   4
   1   2  18 122.184 112.037   8
  -1  -2 -18 103.735 117.011   7
   1   2  18 105.285 111.608  10
  -1  -2 -18-67.5808 160.727   1
   1  -2  18 209.362 121.792   5
  -1  -2 -19-46.1743 143.084   7
   1  -2  19 169.796 135.909   3
   1  -2  19 161.808 127.309   8
   1   2  19-42.7378 156.848  10
   1  -2  19 260.663 126.500   4
  -1  -2 -19 9.27652 134.146   1
   1  -2  19 348.254 171.543   5
   1   2  19 122.678 105.901   8
  -1  -2 -20 1798.34 390.954   1
   1  -2  20 1500.85 235.033   8
   1   2  20 1656.50 252.259  10
   1  -2  20 1691.67 297.764   3
   1  -2  20 1840.69 257.018   4
  -1  -2 -20 1629.37 242.106   7
   1  -2  20 1993.80 267.284   5
   1   2  20 1715.55 233.501   8
   1  -2  21 1249.11 226.050   8
   1   2  21 1612.21 250.373   8
   1   2  21 1567.24 239.289  10
   1  -2  21 1909.66 255.825   5
   1  -2  21 1047.50 253.582   3
   1  -2  21 1600.93 245.285   4
  -1  -2 -21 1149.56 232.303   7
  -1   2 -21 1388.42 333.304   1
  -1  -2 -21 1692.89 356.997   1
   1  -2  22 897.715 199.752   4
  -1   2 -22 665.609 189.227   1
   1  -2  22 795.935 183.516   8
   1   2  22 1108.68 241.019  10
  -1  -2 -22 1102.13 313.512   1
   1  -2  22 1120.96 224.079   5
   1   2  22 826.299 209.070   8
  -1  -2 -22 918.772 203.782   7
   1  -2  22 781.415 232.893   3
   1   2  23 410.746 177.254   8
  -1   2 -23 627.618 254.171   1
   1   2  23 269.005 128.059  10
   1  -2  23 547.496 191.747   5
  -1  -2 -23 495.659 179.166   7
   1  -2  23 728.839 190.973   4
  -1  -2 -23 716.016 239.822   1
   1  -2  23-23.7395 125.778   8
   1  -2  23 289.711 167.212   3
   1  -2  24 119.439 131.140   4
  -1  -2 -24 37.7744 111.931   7
   1   2  24-31.0867 139.481  10
   1   2  24-96.7431 130.921   8
   1  -2  24 96.2642 142.379   8
   1  -2  24 91.9971 112.751   5
   1  -2  25 438.265 152.378   4
   1   2  25 415.547 166.845   8
   1  -2  25 369.217 213.352   8
   1   2  25 260.853 141.498  10
   1  -2  25 385.842 152.098   5
  -1  -2 -25 626.992 178.085   7
   1   2  26 684.625 191.239   5
   1  -2  26 648.641 218.130   8
   1  -2  26 573.053 177.865   4
  -1  -2 -26 617.175 138.294   7
   1   2  26 799.527 194.078   8
   1  -2  26 581.402 196.817   5
   1   2  26 555.823 200.673  10
   1  -2  27 433.323 182.260   8
   1   2  27 165.158 146.986   5
   1  -2  27 258.737 144.835   5
   1  -2  27 172.990 113.514   4
   1   2  27-125.652 169.950   8
   1  -2  28 176.751 158.171   8
   1   2  28 344.485 212.269   8
   1   2  28 232.165 125.153   5
   1  -2  28 243.283 184.980   5
   1  -2  28 174.394 163.446   4
   1   2  29 524.549 215.683   8
   1  -2  29 325.504 194.918   4
   1   2  29 301.657 138.920   5
   1  -2  29 381.555 234.156   8
   1  -2  29 251.182 179.119   5
   1  -2  30 40.5012 148.510   8
   1   2  30-68.2351 140.099   8
   1  -2  30 319.238 232.447   5
   1  -2  30 38.3141 128.569   4
   1   2  30-64.1428 112.777   5
   1  -2  31 392.139 173.491   4
   1  -2  31 359.814 162.369   5
   1   2  31 233.250 182.740   8
   1  -2  31 388.082 186.807   8
   1   2  31 128.945 135.298   5
   1  -2  32 676.202 254.070   5
   1   2  32 610.209 231.867   5
   1   2  32 451.076 211.675   8
   1  -2  32 878.800 238.804   4
   1  -2  33 476.038 220.484   5
   1  -2  33 763.829 266.027   4
   1   2  33 351.314 198.033   8
   1   2  33 848.950 266.493   5
   1   2  34 81.6291 146.396   5
   1  -2  34 135.808 155.089   4
   1  -2  34 417.644 221.329   5
   1   2  34-4.41417 169.789   8
   1   2  35 0.19100 131.737   5
   1  -2  35-20.5166 150.943   5
   1  -2  35-89.7063 159.062   4
   1   2  35-313.505 205.366   8
   1  -2  36-27.7488 177.989   5
   1   2  36 296.592 182.656   8
   1   2  36 27.6694 145.036   5
   1   2  37 76.6638 184.063   8
   1  -2  37-1.20444 159.748   5
   1   2  37-13.0465 152.201   5
   1  -2  38-227.037 160.898   5
   1   2  38-71.8359 193.095   5
   1   2  39 181.510 184.365   5
   1   2  39-25.6532 174.801   8
   1  -2  39 278.295 196.060   5
   1   2  40 244.012 143.283   5
   1  -2  40 375.384 263.856   5
   1   2  40-133.782 190.745   8
   1   2  41 270.731 194.974   5
   1   2  41 53.7242 161.237   8
   1  -2  41-20.9507 202.340   5
   1  -2  42 45.6781 184.845   5
   1   2  42-81.8919 198.519   5
   1   2  43 110.152 230.578   5
   1  -2  43-128.601 235.182   5
   1  -2  44 603.364 277.521   5
   1   2  44 493.121 237.265   5
  -1  -3  45 214.300 164.087   5
  -1   3  45 279.321 144.850   5
  -1   3  44-25.7627 224.812   8
  -1   3  44-0.89124 167.350   5
  -1  -3  44 292.134 236.334   5
  -1   3  43 40.4361 182.022   8
  -1   3  43-355.219 240.626   5
  -1  -3  43-5.72321 192.164   5
  -1   3  42 180.269 257.334   5
  -1   3  42 209.953 215.356   8
  -1  -3  42 61.5788 157.987   5
  -1   3  41 256.700 222.330   8
  -1  -3  41-161.105 195.968   5
  -1   3  41 41.5796 193.008   5
  -1   3  40-65.3108 216.996   8
  -1   3  40-13.1442 143.573   5
  -1  -3  40 249.849 279.257   5
  -1   3  39 231.913 168.155   5
  -1   3  39 691.997 293.871   8
  -1  -3  39 147.380 174.434   5
  -1   3  38 123.060 150.569   5
  -1   3  38 55.9894 182.962   8
  -1  -3  38 444.307 290.992   5
  -1   3  37 117.398 134.860   5
  -1   3  37 371.848 269.422   8
  -1  -3  37 387.305 231.518   5
  -1   3  36 128.543 154.971   5
  -1  -3  36-31.5914 164.381   5
  -1   3  36 122.896 180.555   8
  -1   3  35-351.997 201.326   5
  -1   3  35-198.309 183.737   8
  -1  -3  35-11.3445 150.583   5
  -1  -3  34 413.608 236.124   5
  -1   3  34 525.399 291.967   8
  -1   3  34 269.398 186.316   5
  -1  -3  33 1067.69 337.531   5
  -1   3  33 1300.15 327.212   8
  -1   3  33 1457.07 300.504   5
  -1  -3  32 1034.71 333.340   5
  -1   3  32 958.962 284.933   8
  -1   3  32 1122.78 269.550   5
  -1   3  31 1.76549 158.341   8
  -1  -3  31 27.3243 171.545   5
  -1   3  31 228.124 161.234   5
  -1   3  30 504.996 195.399   5
  -1  -3  30 266.917 208.302   5
  -1   3  30 229.757 219.187   8
  -1   3  29 21.2399 192.205   8
  -1   3  29 12.4419 107.624   5
  -1  -3  29-47.5017 148.841   5
  -1  -3  29-111.373 98.7738   4
  -1   3  29 0.17628 203.892  10
  -1  -3  28 397.841 154.615   4
  -1  -3  28 494.524 173.730   5
  -1   3  28 194.829 128.778  10
  -1   3  28 323.673 153.240   5
  -1   3  28 390.053 168.593   8
  -1   3  27 445.971 248.756  10
  -1  -3  27 687.515 243.682   5
  -1   3  27 778.062 275.697   8
  -1  -3  27 536.246 188.072   4
  -1  -3  27 470.121 208.575   8
  -1  -3  26 395.807 162.447   4
  -1   3  26 23.0348 136.557   8
  -1   3  26 56.5878 121.210  10
  -1  -3  26 27.7644 153.675   8
  -1  -3  26 251.685 189.566   5
  -1  -3  25 222.071 141.209   4
  -1   3  25 162.064 141.933   8
  -1  -3  25-82.4498 129.630   8
  -1  -3  25-30.8161 117.924   5
  -1   3  25-17.8706 115.237  10
  -1   3  24 2535.20 357.072  10
  -1  -3  24 3163.92 362.126   5
   1  -3 -24 2626.03 353.569   7
  -1   3  24 2381.42 340.591   8
  -1  -3  24 2303.29 342.010   8
  -1  -3  24 3305.34 342.249   4
  -1   3  23 883.684 210.243   8
  -1  -3  23 1020.65 226.891   5
  -1  -3  23 868.550 214.482   8
  -1  -3  23 1018.63 205.563   4
   1  -3 -23 838.324 220.211   7
  -1  -3  23 650.363 266.810   3
  -1   3  23 808.266 211.861  10
  -1  -3  22 419.581 150.272   5
   1  -3 -22 405.393 164.461   7
  -1   3  22 687.132 204.157   8
  -1  -3  22 395.221 213.955   3
  -1  -3  22 392.085 134.679   4
  -1  -3  22-180.877 145.327   8
   1  -3 -22 595.668 258.915   1
  -1   3  22 180.453 138.391  10
  -1  -3  21 3741.61 377.957   5
   1  -3 -21 3357.44 377.291   7
  -1  -3  21 3574.53 345.111   4
  -1   3  21 3086.31 365.984  10
  -1  -3  21 2722.30 327.839   8
  -1  -3  21 3366.00 520.175   3
  -1   3  21 3320.28 586.365   1
   1  -3 -21 4307.90 657.539   1
  -1   3  21 3657.43 359.298   8
  -1   3  20 536.016 224.140   1
  -1  -3  20 366.689 140.240   8
  -1   3  20 660.640 191.671  10
   1  -3 -20 906.746 253.575   7
  -1  -3  20 463.100 140.446   4
  -1  -3  20 431.598 159.547   3
  -1   3  20 730.237 212.035   8
  -1  -3  20 551.554 163.008   5
   1  -3 -20 826.250 296.571   1
   1  -3 -19 1964.79 430.609   1
   1  -3 -19 1700.72 284.743   7
  -1   3  19 1701.35 247.971   8
  -1  -3  19 1760.99 250.765   8
  -1  -3  19 1841.53 250.552   5
  -1  -3  19 1966.26 402.009   3
  -1   3  19 1738.12 262.084  10
  -1  -3  19 1741.18 229.754   4
  -1   3  19 2226.52 478.556   1
  -1   3  18 979.473 354.765   1
   1  -3 -18 757.860 296.599   1
   1  -3 -18 580.833 214.852   7
  -1  -3  18 691.647 185.540   5
   1   3 -18 570.547 214.900   3
  -1  -3  18 282.971 129.989   8
  -1  -3  18 421.334 138.279   4
  -1  -3  18 716.917 297.622   3
  -1   3  18 555.557 169.150   8
  -1   3  18 707.663 204.968  10
  -1   3  17 2516.27 509.088   1
  -1  -3  17 2576.04 437.628   3
  -1   3  17 1936.89 284.429  10
   1   3 -17 2171.25 366.574   3
  -1   3  17 2296.04 270.119   8
  -1  -3  17 1896.88 234.026   4
   1  -3 -17 1619.42 237.750   7
  -1  -3  17 1983.99 273.601   8
  -1  -3  17 2936.35 318.627   5
   1  -3 -17 2731.46 540.008   1
  -1   3  16 700.820 183.029  10
  -1   3  16 630.040 161.224   8
  -1  -3  16 669.343 139.618   5
   1   3 -16 907.687 264.336   3
   1  -3 -16 1031.34 323.685   1
  -1  -3  16 664.259 148.062   4
  -1   3  16 869.827 339.929   1
  -1  -3  16 612.598 211.459   3
   1  -3 -16 712.276 193.237   7
   1  -3 -15 1604.01 409.856   1
  -1  -3  15 1481.60 195.386   4
  -1  -3  15 1447.25 316.853   3
  -1  -3  15 1722.37 233.788   5
  -1   3  15 1701.30 217.568   8
  -1   3  15 1343.80 350.170   1
   1   3 -15 1597.14 308.099   3
  -1   3  15 1661.42 235.764  10
   1  -3 -15 1790.45 254.730   7
   1  -3 -14 5482.45 765.122   1
  -1  -3  14 4991.83 600.252   3
  -1  -3  14 5841.68 383.281   5
   1   3 -14 5421.21 568.445   3
  -1   3  14 6533.89 399.917   8
  -1  -3  14 5074.55 335.236   4
  -1   3  14 5952.63 420.527  10
  -1   3  14 5760.45 678.287   1
   1  -3 -14 6202.26 455.580   7
  -1   3  13 1604.52 363.231   1
  -1  -3  13 1452.55 196.467   5
  -1   3  13 1377.92 183.900   8
   1   3 -13 1339.05 282.730   3
  -1   3  13 1064.37 182.715  10
  -1  -3  13 1487.36 174.110   4
   1  -3 -13 1410.55 413.068   1
   1  -3 -13 1234.05 230.897   7
  -1  -3  13 1480.95 329.820   3
  -1   3  12 666.299 139.820   8
  -1  -3  12 572.878 126.874   4
  -1  -3  12 478.895 118.909   5
   1  -3 -12 678.391 183.153   7
   1  -3 -12 171.507 170.345   1
  -1  -3  12 728.629 276.335   3
  -1   3  12 619.391 138.356  10
   1   3 -12 591.075 193.989   3
  -1   3  12 412.108 175.044   1
  -1   3  11 1633.28 202.863  10
   1   3 -11 1654.43 330.085   3
   1  -3 -11 1675.12 240.958   7
  -1   3  11 1783.50 207.698   8
  -1  -3  11 1745.84 184.601   5
  -1   3  11 1847.35 389.925   1
  -1  -3  11 1663.14 324.944   3
   1  -3 -11 1661.25 375.317   1
  -1  -3  11 1747.10 199.023   4
  -1  -3  10-18.4632 110.113   5
  -1  -3  10 82.8992 67.8219   4
  -1   3  10 9.27203 172.985   1
  -1   3  10 127.999 108.513   8
  -1   3  10 84.5222 81.5394  10
   1   3 -10-103.380 158.088   3
   1  -3 -10 308.471 153.195   7
  -1  -3  10 203.556 188.511   3
   1  -3 -10 281.155 265.149   1
  -1  -3   9 644.511 132.599   4
   1   3  -9 611.164 208.200   3
  -1   3   9 533.018 134.569   8
   1  -3  -9 376.907 146.626   1
  -1   3   9 416.972 247.541   1
  -1  -3   9 632.989 273.169   3
   1  -3  -9 713.074 172.693   7
  -1  -3   8 1184.71 286.482   3
   1  -3  -8 2021.77 232.677  11
  -1   3   8 1560.98 350.594   1
  -1  -3   8 1337.52 162.172   4
   1  -3  -8 1324.40 340.075   1
   1   3  -8 1534.72 315.329   3
   1  -3  -7 4629.73 580.218   1
  -1  -3   7 4741.08 249.022   6
   1  -3  -7 5706.68 381.997  11
  -1  -3   7 4977.06 548.584   3
   1   3  -7 5153.64 498.101   3
  -1  -3   7 5057.00 295.622   4
  -1   3   6 16316.4 539.860  10
   1   3  -6 16086.0 910.482   3
  -1   3   6 16012.1 465.680   2
  -1  -3   6 16908.7 542.521   4
  -1  -3   6 17319.0 998.923   3
   1  -3  -6 16016.1 1019.53   1
   1  -3  -6 16138.8 615.436  11
  -1  -3   6 15529.6 396.117   6
   1   3  -5 1897.08 382.048   3
   1  -3  -5 2085.57 414.508   1
  -1  -3   5 798.526 207.736   4
   1  -3  -5 1357.78 225.101   9
  -1   3   5 2409.08 248.386  10
  -1   3   5 1273.36 189.296   2
   1  -3  -4 22596.1 1294.69   1
   1   3  -4 25360.7 1219.51   3
  -1   3   4 18045.0 659.386  10
   1  -3  -3 1276.41 335.609   1
  -1  -3   3 709.286 174.462   4
   1  -3  -3 960.665 113.253   9
  -1  -3   3 815.389 114.617   9
   1   3  -3 854.722 201.548   3
   1  -3  -2-147.970 164.793   1
  -1  -3   2 58.4807 64.2332   9
  -1  -3   2 64.1010 86.6327   4
   1   3  -2 72.3276 148.839   3
  -1  -3   1 410.794 100.253   7
  -1   3   1 309.116 187.683   3
   1   3  -1 418.491 217.403   3
  -1  -3   1 673.540 141.944  11
  -1  -3   1 748.284 126.065   9
   1  -3  -1 361.241 196.321   1
  -1   3   0 438.247 175.467   3
   1  -3   0 680.934 117.473   5
  -1  -3   0 887.762 110.663   7
  -1  -3   0 765.390 136.721  11
  -1  -3   0 845.877 128.880   9
   1   3   0 424.149 200.568   3
  -1  -3  -1 1132.53 147.151   7
  -1   3  -1 813.896 216.375   3
   1   3   1 664.294 260.036   3
   1  -3   1 986.957 136.800   5
   1  -3   2 81837.8 946.984   6
  -1   3  -2 77012.4 1935.57   3
   1  -3   2 80928.6 1031.96   5
   1   3   2 78985.1 2113.27   3
  -1  -3  -3 61652.4 1038.39  11
   1   3   3 63406.7 1945.08   1
   1   3   3 63329.1 1915.68   3
  -1   3  -3 62379.6 1948.06   1
  -1   3  -3 60225.0 1677.15   3
   1  -3   3 63578.8 913.823   5
   1  -3   3 61906.5 858.019   6
  -1  -3  -4 18493.6 579.052  11
  -1   3  -4 16741.6 1033.86   1
   1   3   4 17418.4 1031.64   1
   1  -3   4 18368.4 501.485   5
  -1   3  -4 16914.1 864.823   3
   1  -3   4 17518.2 484.585   6
  -1  -3  -4 16531.9 1031.06   1
   1  -3   5 2526.94 216.495   6
   1  -3   5 2862.16 226.684   5
   1  -3   5 2348.09 396.415   3
   1  -3   5 2477.37 245.837   4
  -1   3  -5 2230.35 446.621   1
  -1  -3  -5 2886.61 259.231  11
  -1   3  -5 2349.08 374.930   3
  -1  -3  -5 2247.27 444.914   1
   1   3   5 2728.06 428.189   1
   1  -3   6 2742.37 208.364   5
   1   3   6 2897.03 442.458   1
   1  -3   6 2807.02 222.754   6
   1  -3   6 2972.00 389.070   3
   1  -3   6 2646.94 244.719   4
  -1   3  -6 2886.40 381.508   3
  -1  -3  -6 2737.63 249.795  11
  -1  -3  -6 2722.81 439.991   1
   1   3   7 1373.10 294.983   1
  -1  -3  -7 891.885 139.056  11
   1  -3   7 1405.11 287.622   3
   1  -3   7 1331.83 185.931   4
   1  -3   7 1492.32 168.236   6
  -1  -3  -7 1547.19 336.780   1
  -1   3  -7 1342.56 252.445   3
   1  -3   7 1376.78 170.353   5
   1   3   7 1130.51 143.469   8
   1   3   8 8730.56 739.926   1
   1  -3   8 8211.04 377.183   5
   1   3   8 7936.29 355.936   8
  -1  -3  -8 8436.96 754.153   1
   1  -3   8 8000.58 672.590   3
  -1   3  -8 8018.44 594.500   3
   1  -3   8 7730.13 384.278   6
   1  -3   8 8446.01 420.737   4
  -1  -3  -9 409.159 231.562   1
   1  -3   9 336.084 99.3848   4
   1  -3   9 355.629 100.389   5
   1  -3   9 430.014 181.910   3
  -1  -3  -9 590.574 165.005   7
   1   3   9 565.896 123.366   8
   1   3   9 390.383 105.913  10
  -1   3  -9 388.216 133.992   3
   1   3   9 360.479 217.820   1
   1  -3   9 328.313 112.043   6
  -1  -3 -10 374.244 194.345   7
   1  -3  10 196.523 160.342   3
   1   3  10 651.825 181.310   8
  -1  -3 -10 186.307 293.657   1
  -1   3 -10 294.624 189.067   3
   1  -3  10 388.111 194.001   5
   1  -3  10 145.274 163.075   4
   1   3  10 386.400 275.821   1
   1   3  10 1000.55 235.554  10
   1  -3  10 202.741 172.027   6
   1   3  11-124.137 169.231   1
   1  -3  11-41.9998 85.9540   5
   1  -3  11 260.278 116.970   4
   1   3  11 178.390 147.165  10
  -1   3 -11-39.3862 107.554   3
   1   3  11-92.7313 93.1637   8
   1  -3  11 100.992 108.706   6
  -1  -3 -11 147.220 207.602   1
   1  -3  11 108.236 129.377   3
  -1  -3 -11 179.514 131.778   7
  -1  -3 -12-51.7566 110.165   7
   1  -3  12 173.038 116.000   6
  -1   3 -12 56.4846 106.087   3
   1   3  12 261.088 118.387  10
   1  -3  12 132.223 95.0099   5
   1  -3  12 156.329 106.788   4
  -1  -3 -12 177.845 139.580   1
   1   3  12 209.543 98.1237   8
   1  -3  12 161.070 194.789   3
   1   3  12 101.222 153.469   1
   1   3  13 1764.26 380.372   1
   1   3  13 2106.99 267.560  10
  -1   3 -13 1893.55 312.048   3
   1  -3  13 1864.60 213.262   5
   1  -3  13 1665.24 219.968   4
   1   3  13 2164.85 218.653   8
  -1  -3 -13 2309.48 279.094   7
   1  -3  13 1766.80 329.976   3
  -1  -3 -13 1940.87 418.232   1
  -1  -3 -14 576.721 296.552   1
   1   3  14 464.445 126.695   8
  -1   3 -14 336.206 140.589   3
   1   3  14 162.202 144.331   1
   1  -3  14 240.303 103.428   5
   1   3  14 598.077 172.088  10
   1  -3  14 42.0939 135.980   3
  -1  -3 -14 398.114 158.992   7
   1  -3  14 211.079 97.3924   4
   1   3  15 421.283 132.733   8
   1   3  15 386.150 173.645   1
   1  -3  15 434.530 143.854   4
   1   3  15 346.421 138.854  10
  -1  -3 -15 538.881 190.061   7
  -1  -3 -15 406.400 243.250   1
   1  -3  15 404.024 187.528   3
   1  -3  15 483.152 141.853   5
  -1   3 -15 459.915 161.376   3
   1   3  16 1872.05 215.290   8
   1   3  16 2296.55 417.775   1
   1  -3  16 2011.72 242.225   5
   1  -3  16 1764.28 237.999   4
   1  -3  16 2155.90 405.354   3
  -1  -3 -16 1611.57 252.878   7
   1   3  16 1473.81 258.245  10
  -1  -3 -16 2234.36 446.698   1
  -1   3 -16 2259.01 304.457   3
   1   3  17 1109.43 176.285   8
  -1  -3 -17 591.223 316.867   1
   1   3  17 856.908 281.775   1
  -1  -3 -17 1135.63 237.423   7
   1   3  17 781.748 198.023  10
   1  -3  17 459.164 205.711   3
   1  -3  17 816.354 155.346   5
   1  -3  17 612.299 154.774   4
  -1  -3 -18 461.909 235.904   1
   1   3  18 596.221 142.036   8
   1  -3  18 425.132 142.587   5
  -1  -3 -18 415.476 169.980   7
   1  -3  18 915.917 212.863   4
   1  -3  18 391.827 185.626   3
   1   3  18 648.359 194.020  10
   1   3  18 463.917 195.665   1
   1  -3  19 1270.49 341.208   3
  -1  -3 -19 1827.89 338.818   7
   1   3  19 1756.23 381.505   1
   1  -3  19 1818.05 274.868   5
   1   3  19 2254.96 276.565   8
   1  -3  19 1510.79 289.035   4
   1   3  19 2060.78 296.962  10
  -1  -3 -19 1141.75 370.661   1
   1   3  20 852.035 197.170   8
   1  -3  20 811.834 281.231   3
   1   3  20 956.899 229.908  10
   1   3  20 792.546 263.397   1
   1  -3  20 805.134 174.944   4
   1  -3  20 950.130 222.743   5
  -1  -3 -20 614.586 234.204   1
  -1  -3 -20 862.718 210.529   7
   1   3  21 948.971 237.562   8
   1   3  21 900.361 216.207  10
  -1  -3 -21 295.851 130.779   1
   1  -3  21 640.800 273.754   3
   1  -3  21 677.887 169.068   5
  -1  -3 -21 801.691 249.620   7
   1  -3  21 714.357 198.935   4
   1   3  22 1773.74 288.318  10
   1   3  22 1893.92 264.359   8
   1  -3  22 2084.05 301.292   4
   1  -3  22 2413.03 323.723   5
  -1  -3 -22 2023.46 304.373   7
  -1  -3 -22 2058.89 424.048   1
   1  -3  23 405.744 178.776   4
  -1  -3 -23 269.196 186.289   7
   1   3  23 385.329 120.862   8
   1  -3  23 436.427 204.515   5
   1   3  23 417.939 185.572  10
  -1  -3 -24-287.984 161.565   7
   1   3  24-28.3439 111.895   8
   1  -3  24 107.197 128.146   4
   1   3  24-118.769 133.969  10
   1  -3  24-170.201 155.307   5
   1  -3  25 337.685 178.631   4
   1   3  25-20.7411 110.543   8
   1   3  25 53.1421 134.692  10
  -1  -3 -25 253.341 157.685   7
   1  -3  25 217.007 168.054   5
   1   3  26 208.240 160.016  10
   1  -3  26 289.773 167.306   5
   1   3  26 147.842 156.609   8
  -1  -3 -26 382.120 215.769   7
   1  -3  26 117.239 122.924   4
   1  -3  27 1150.99 272.271   4
   1   3  27 953.266 242.605   8
   1  -3  27 1404.57 304.572   5
   1   3  27 859.541 250.309  10
  -1  -3 -27 1169.26 270.075   7
   1  -3  28 1425.95 327.456   5
  -1  -3 -28 1366.06 256.682   7
   1   3  28 1127.18 280.215  10
   1   3  28 1285.38 295.707   8
   1  -3  28 1186.61 285.386   4
   1   3  29 137.839 145.252   5
   1  -3  29 284.063 176.360   4
   1  -3  29-149.267 215.309   5
   1   3  29-315.123 204.723  10
   1   3  29 32.6567 156.230   8
   1   3  30 356.608 152.419   5
   1  -3  30 693.180 245.098   4
   1  -3  30 568.729 220.182   5
   1   3  30 128.761 175.121   8
   1   3  31 963.612 271.884   5
   1   3  31 1023.41 302.306   8
   1  -3  31 1161.49 283.180   4
   1  -3  31 1181.26 328.077   5
   1   3  32-84.9121 159.371   8
   1  -3  32 99.5729 180.969   5
   1  -3  32 109.676 146.495   4
   1   3  32 105.871 139.222   5
   1  -3  33 304.021 214.302   5
   1   3  33 71.2782 182.575   5
   1  -3  33 157.477 156.986   4
   1   3  33 145.497 155.883   8
   1   3  34 508.292 210.844   5
   1   3  34 843.518 315.185   8
   1  -3  34 271.982 176.864   5
   1  -3  34-1.93700 184.336   4
   1   3  35 282.848 187.170   5
   1   3  35 612.565 244.925   8
   1  -3  35 467.357 225.572   5
   1   3  36 527.207 267.959   5
   1   3  36 477.079 166.647   8
   1  -3  36 311.883 229.429   5
   1  -3  37-73.8496 197.241   5
   1   3  37 493.344 171.370   8
   1   3  37 245.058 168.897   5
   1   3  38-270.528 203.304   5
   1   3  38 61.1095 175.586   8
   1  -3  38 21.0417 198.596   5
   1   3  39 59.7568 158.371   8
   1   3  39-76.6468 161.139   5
   1  -3  39-153.725 252.415   5
   1  -3  40 31.2635 193.776   5
   1   3  40 38.8785 211.042   5
   1   3  40-188.665 178.535   8
   1   3  41-90.1926 149.837   5
   1  -3  41 70.8177 182.448   5
   1  -3  42 206.884 184.420   5
   1   3  42-250.108 220.157   5
   1  -3  43 317.915 227.800   5
   1   3  43-399.548 207.577   5
   1  -3  44-367.971 204.487   5
   1   3  44-126.918 187.885   5
  -1   4  44-185.347 176.503   5
  -1  -4  44-185.204 196.060   5
  -1   4  43 247.718 188.462   5
  -1  -4  43-21.1740 153.669   5
  -1   4  43 341.250 260.081   8
  -1   4  42 120.072 160.753   5
  -1  -4  42-55.9299 202.687   5
  -1   4  42 214.951 191.557   8
  -1   4  41 72.8886 152.485   5
  -1   4  41 62.9432 191.288   8
  -1  -4  41-235.304 217.112   5
  -1   4  40 188.351 168.904   5
  -1  -4  40 770.856 297.196   5
  -1   4  40 440.569 200.191   8
  -1   4  39 54.1065 193.079   5
  -1  -4  39 39.0889 242.847   5
  -1   4  39-146.711 218.843   8
  -1   4  38 414.352 225.108   5
  -1  -4  38 326.094 202.833   5
  -1   4  38 68.7898 177.099   8
  -1   4  37 171.715 149.475   5
  -1  -4  37 237.812 184.442   5
  -1   4  37 321.139 261.439   8
  -1   4  36 963.914 250.726   5
  -1   4  36 567.120 252.551   8
  -1  -4  36 936.847 352.004   5
  -1  -4  35 37.3509 239.052   5
  -1   4  35 417.686 225.236   8
  -1   4  35 165.382 165.247   5
  -1   4  34 230.355 143.039   5
  -1   4  34 50.6380 181.314   8
  -1  -4  34 287.927 168.303   5
  -1   4  33 90.6147 150.322   5
  -1   4  33 76.6791 169.944   8
  -1  -4  33 556.777 277.307   5
  -1   4  32 306.031 204.644   8
  -1   4  32 143.395 168.769   5
  -1  -4  32 143.052 178.259   5
  -1  -4  31 160.606 182.295   5
  -1   4  31 224.298 180.019  10
  -1   4  31 343.738 239.598   8
  -1   4  31-0.15148 134.187   5
  -1   4  30 202.826 211.186  10
  -1  -4  30 267.583 247.238   5
  -1   4  30 269.213 160.045   5
  -1   4  30 165.843 176.934   8
  -1   4  29 400.443 244.053  10
  -1  -4  29 371.486 213.279   5
  -1   4  29 496.411 231.139   8
  -1   4  28 98.3928 138.374  10
  -1  -4  28 349.140 224.219   5
  -1   4  28 68.7330 192.290   8
  -1   4  27-168.919 195.552   8
  -1   4  27-293.178 170.968  10
  -1  -4  27-7.23685 118.354   4
  -1  -4  27 109.922 156.831   5
  -1   4  26-219.975 214.303  10
  -1   4  26-170.596 150.384   8
  -1  -4  26-17.4710 125.678   5
  -1  -4  26 179.345 124.726   4
  -1   4  25 516.376 206.423   8
  -1  -4  25 452.526 174.338   4
  -1   4  25 405.152 189.975  10
  -1  -4  25 432.148 190.575   5
  -1   4  24-85.6079 142.549   8
   1  -4 -24 19.9061 138.112   7
  -1   4  24 224.687 172.050  10
  -1  -4  24 80.2976 123.529   4
  -1  -4  24 77.4500 134.538   5
  -1   4  23 732.080 208.802   8
   1  -4 -23 711.540 230.188   7
  -1  -4  23 850.648 206.757   4
  -1  -4  23 770.175 233.028   5
  -1   4  23 444.000 197.108  10
  -1  -4  22 3069.66 385.598   5
  -1  -4  22 3319.85 357.854   4
   1  -4 -22 3382.84 403.053   7
  -1   4  22 2839.95 389.967  10
  -1   4  22 3395.75 388.603   8
   1  -4 -21 1219.00 266.486   7
  -1  -4  21 1055.07 232.790   5
  -1   4  21 467.104 180.104  10
  -1  -4  21 1278.75 230.889   4
  -1   4  21 911.686 204.904   8
  -1   4  20 941.889 221.897  10
  -1   4  20 910.307 197.626   8
   1  -4 -20 895.983 256.394   7
  -1  -4  20 624.459 158.738   4
   1   4 -20 651.718 206.298   3
  -1  -4  20 553.867 181.340   5
  -1  -4  20 466.112 179.724   3
   1  -4 -19 618.280 231.946   7
  -1   4  19-16.5554 115.014  10
   1   4 -19 219.309 136.979   3
  -1  -4  19 121.790 115.900   5
  -1  -4  19 358.018 140.067   4
  -1   4  19 346.513 160.402   8
  -1  -4  19 78.6683 178.670   3
   1  -4 -19 137.463 183.679   1
   1   4 -18 3274.87 476.824   3
  -1   4  18 3146.38 346.762   8
  -1  -4  18 2952.96 324.916   5
   1  -4 -18 3139.25 376.247   7
  -1  -4  18 3211.29 331.612   4
  -1  -4  18 3229.36 533.257   3
  -1   4  18 3303.47 571.878   1
  -1   4  18 2504.33 352.983  10
   1  -4 -18 3334.40 616.890   1
  -1  -4  17 1567.46 240.654   5
   1   4 -17 1832.44 349.871   3
  -1   4  17 1857.67 270.939   8
   1  -4 -17 1435.80 283.255   7
  -1   4  17 1546.86 398.183   1
  -1  -4  17 1817.01 399.359   3
   1  -4 -17 1406.97 435.664   1
  -1   4  17 1778.30 304.885  10
  -1  -4  17 1560.97 246.078   4
  -1  -4  16 408.489 121.270   4
  -1  -4  16 164.165 108.025   5
  -1   4  16 230.175 219.331   1
  -1   4  16 314.306 160.749  10
  -1   4  16 339.585 136.271   8
   1  -4 -16 271.262 164.065   7
  -1  -4  16 582.753 242.548   3
   1  -4 -16 364.970 238.842   1
   1   4 -16 148.011 99.0724   3
  -1  -4  15 696.777 151.718   5
  -1   4  15 604.821 177.221  10
  -1  -4  15 626.506 148.354   4
  -1  -4  15 980.093 294.376   3
   1  -4 -15 1454.08 439.858   1
   1   4 -15 1004.40 289.750   3
  -1   4  15 650.941 178.303   8
  -1   4  15 843.193 293.773   1
   1  -4 -15 893.996 253.805   7
  -1  -4  14 5298.40 388.157   5
   1  -4 -14 5617.31 790.931   1
  -1   4  14 5787.29 402.074   8
  -1   4  14 4788.13 422.419  10
   1  -4 -14 5034.88 455.807   7
   1   4 -14 5201.54 628.776   3
  -1  -4  14 5050.39 670.886   3
  -1  -4  14 3933.08 358.577   4
  -1   4  14 5530.56 744.014   1
  -1   4  13 160.922 137.933  10
  -1   4  13 407.011 299.081   1
  -1  -4  13 181.318 106.864   5
   1  -4 -13 531.552 267.479   1
   1  -4 -13-100.889 138.471   7
  -1  -4  13 229.966 98.8551   4
  -1   4  13 159.512 111.284   8
  -1  -4  13 348.926 194.695   3
   1   4 -13 344.032 216.288   3
  -1  -4  12 114.850 113.975   4
  -1  -4  12 204.970 188.380   3
   1  -4 -12 49.8645 191.182   1
  -1   4  12 87.9225 85.6787   8
   1  -4 -12 306.651 158.115   7
  -1   4  12 117.861 163.065   1
  -1  -4  12 174.974 101.480   5
  -1   4  12 171.835 105.273  10
   1   4 -12 291.900 183.509   3
  -1  -4  11 1056.16 168.080   5
  -1  -4  11 1326.18 351.471   3
  -1   4  11 1499.19 372.140   1
   1  -4 -11 834.847 175.347   7
   1  -4 -11 1229.94 379.538   1
  -1  -4  11 1026.35 185.234   4
   1   4 -11 1329.21 337.174   3
  -1   4  11 1037.97 185.520   8
  -1   4  11 948.196 177.930  10
  -1   4  10 5800.40 418.764  10
  -1  -4  10 5891.71 396.876   5
  -1  -4  10 6115.27 730.961   3
  -1   4  10 6063.30 771.703   1
   1  -4 -10 6068.42 789.768   1
  -1   4  10 5571.19 396.302   8
   1   4 -10 6268.73 672.746   3
   1  -4 -10 5161.81 450.600   7
  -1  -4  10 5469.57 410.675   4
  -1   4   9 10002.1 532.573  10
  -1  -4   9 10757.9 918.219   3
  -1  -4   9 10407.5 522.998   4
  -1  -4   9 10373.4 497.024   5
   1  -4  -9 9756.19 591.059  11
   1  -4  -9 10367.1 974.848   1
   1   4  -9 10403.9 837.874   3
   1  -4  -9 10370.6 544.735   7
  -1   4   9 11175.4 979.415   1
  -1   4   9 9564.42 471.958   8
   1   4  -8 5552.03 277.819  12
  -1  -4   8 5750.04 407.687   4
  -1   4   8 6209.35 715.430   1
   1  -4  -8 4924.89 414.499  11
  -1  -4   8 5647.30 290.198   6
  -1  -4   8 5872.95 391.615   5
   1  -4  -8 5525.55 715.690   1
   1   4  -8 5787.85 644.840   3
  -1   4   8 5241.54 381.703  10
   1  -4  -8 5177.17 395.808   7
  -1  -4   8 5994.04 713.614   3
  -1  -4   7 759.762 266.359   3
   1  -4  -7 1012.60 209.657  11
   1  -4  -7 733.164 172.710   7
  -1   4   7 900.243 337.887   1
  -1  -4   7 760.390 121.054   6
  -1  -4   7 1002.91 189.402   5
   1  -4  -7 767.560 344.391   1
   1   4  -7 887.597 282.594   3
  -1   4   7 1035.52 192.658  10
  -1   4   7 674.588 117.618   2
   1   4  -7 1090.90 125.805  12
  -1  -4   7 749.879 159.374   4
  -1  -4   6 2596.30 274.947   5
   1  -4  -6 2007.94 179.610   6
   1  -4  -6 2042.23 276.393  11
   1   4  -6 2132.59 381.015   3
  -1   4   6 2033.41 241.425  10
  -1   4   6 2132.38 426.935   1
  -1  -4   6 2326.56 432.107   3
   1  -4  -6 1871.27 249.396   7
  -1   4   6 2269.80 227.827   2
  -1  -4   6 2104.45 175.931   6
   1  -4  -6 2383.96 482.168   1
   1  -4  -6 2083.46 229.432   9
  -1  -4   6 2190.09 245.621   4
   1  -4  -5 5491.90 334.094   9
  -1   4   5 5339.80 378.140   2
  -1  -4   5 6326.38 704.441   3
  -1  -4   5 5411.02 248.805   6
  -1  -4   5 5987.85 384.196   5
   1   4  -5 5804.64 740.828   1
   1  -4  -5 5425.96 278.237   6
   1  -4  -5 5394.01 418.141  11
  -1   4   5 5257.13 371.523  10
   1  -4  -5 4815.92 356.860   7
  -1  -4   5 5827.38 407.904   4
  -1  -4   5 5234.87 314.980   9
  -1  -4   5 5815.71 307.442   7
   1   4  -5 5648.26 610.279   3
  -1   4   5 5472.58 669.613   1
   1  -4  -5 5704.48 688.511   1
  -1  -4   4-99.5974 93.2350   7
  -1  -4   4-25.9416 65.3648   6
  -1  -4   4 130.121 139.304   4
   1  -4  -4 283.650 104.534   9
  -1  -4   4 107.428 97.7008   9
   1  -4  -4 272.452 137.427  11
  -1   4   4 300.054 225.275   1
   1   4  -4 70.6280 162.912   1
   1  -4  -4 162.798 163.517   7
   1  -4  -4 336.817 169.603   1
  -1  -4   4 578.348 172.644   5
   1  -4  -4 184.525 85.4818   6
   1   4  -4 339.994 220.189   3
  -1  -4   3 426.096 116.189   4
   1   4  -3 275.540 187.905   3
   1  -4  -3 264.828 141.065   7
   1  -4  -3 124.171 89.2886  11
  -1  -4   3 307.634 106.237   7
  -1  -4   3 329.581 93.6901   9
   1  -4  -3 222.506 63.0109   6
   1  -4  -3 532.748 250.411   1
  -1  -4   3 567.162 167.092   5
   1  -4  -3 145.814 75.8968   9
  -1  -4   2 11070.5 446.913   7
  -1   4   2 10650.7 873.221   3
  -1  -4   2 11010.3 546.025  11
  -1  -4   2 11508.0 454.554   9
  -1  -4   2 12431.8 526.122   5
   1  -4  -2 11525.6 428.416   9
  -1  -4   2 11649.1 552.892   4
   1  -4  -2 10695.6 356.939   6
   1   4  -2 10372.2 844.588   3
   1  -4  -2 11532.7 552.438  11
   1  -4  -1 6568.08 417.302  11
  -1  -4   1 7382.35 376.867   9
  -1  -4   1 7195.48 369.831   7
   1   4  -1 7990.07 774.700   3
  -1   4   1 8299.14 774.799   3
   1  -4  -1 7331.57 311.040   6
   1  -4  -1 7269.57 326.181   9
  -1  -4   1 6659.18 426.803  11
  -1  -4   0 6102.73 410.154  11
   1   4   0 5521.36 631.112   3
  -1   4   0 5467.35 619.965   3
   1  -4   0 6501.47 414.907  11
  -1   4   0 5779.64 654.431   1
   1  -4   0 6424.20 300.210   9
   1  -4   0 6098.34 279.033   6
  -1  -4   0 5999.99 334.700   9
  -1  -4   0 6010.60 337.445   7
   1   4   0 5890.10 697.416   1
   1  -4   0 5520.98 376.450   4
   1  -4   1 5502.96 286.383   9
   1   4   1 4812.38 670.414   1
  -1  -4  -1 4957.85 381.328  11
  -1   4  -1 4681.52 625.752   1
   1  -4   1 5290.63 389.488  11
  -1   4  -1 4588.19 602.474   3
  -1  -4  -1 5348.22 329.406   9
   1  -4   1 4930.45 369.149   4
   1   4   1 5290.55 627.303   3
   1  -4   1 4942.23 336.504   5
   1  -4   1 5061.16 275.142   6
  -1  -4  -1 4846.53 337.930   7
   1  -4   2 474.855 109.792   5
  -1  -4  -2 833.809 149.133   9
  -1  -4  -2 675.682 154.882   7
   1  -4   2 601.091 105.977   6
  -1   4  -2 652.149 323.701   1
   1   4   2 282.194 166.248   3
   1  -4   2 891.480 200.218  11
   1  -4   2 642.188 106.479   9
   1  -4   2 502.051 136.904   4
   1   4   2 400.894 271.016   1
  -1   4  -2 526.425 238.841   3
  -1  -4  -2 959.017 196.151  11
  -1  -4  -3 4342.66 334.452   7
  -1   4  -3 4373.59 613.157   1
   1   4   3 3937.51 587.523   1
   1  -4   3 4318.36 347.628   4
  -1   4  -3 3846.33 494.273   3
  -1  -4  -3 4616.64 312.932   9
  -1  -4  -3 4628.64 363.975  11
   1   4   3 4202.63 581.323   3
   1  -4   3 4329.39 298.323   5
   1  -4   3 4435.49 351.073  11
   1  -4   3 4043.91 252.364   6
   1  -4   3 4494.32 251.811   9
  -1  -4  -4 19634.0 703.847   7
   1  -4   4 20131.9 576.749   6
   1   4   4 19437.2 1247.71   3
  -1   4  -4 19622.9 1289.64   1
  -1  -4  -4 21359.4 753.657  11
   1   4   4 20245.3 1298.77   1
  -1  -4  -4 21994.1 683.390   9
   1  -4   4 20936.8 528.526   9
  -1   4  -4 19292.8 1114.39   3
   1  -4   4 20698.9 740.332   4
   1  -4   4 19977.9 647.949   5
   1   4   5 22199.2 1335.56   3
  -1  -4  -5 20459.6 715.295   7
   1  -4   5 20561.9 657.075   5
  -1   4  -5 21187.6 1142.61   3
   1  -4   5 20285.7 534.875   9
   1   4   5 22590.5 1360.27   1
  -1  -4  -5 20704.4 688.962   9
  -1   4  -5 22013.1 1352.78   1
   1  -4   5 21037.9 606.430   6
   1  -4   5 21359.9 735.708   4
  -1  -4  -5 19389.9 737.441  11
  -1  -4  -6 4270.52 333.997   9
   1  -4   6 4022.41 245.250   9
   1  -4   6 4390.86 302.148   6
  -1  -4  -6 4721.51 644.480   1
   1   4   6 4042.09 326.068  10
   1  -4   6 4754.80 364.075   4
   1   4   6 5240.73 664.937   3
  -1  -4  -6 3846.24 327.580   7
  -1   4  -6 4509.40 541.169   3
   1   4   6 5136.79 669.690   1
   1  -4   6 4340.15 299.653   5
  -1   4  -6 4860.68 676.000   1
  -1  -4  -6 3981.74 352.083  11
  -1  -4  -7 1145.03 185.928  11
  -1  -4  -7 1372.42 354.871   1
   1   4   7 1030.29 180.252  10
  -1  -4  -7 1240.41 200.341   9
   1   4   7 1137.14 312.041   1
  -1  -4  -7 1007.85 184.114   7
  -1   4  -7 1347.13 312.925   3
   1  -4   7 1170.70 168.274   5
  -1   4  -7 1153.19 361.186   1
   1  -4   7 1143.88 175.951   6
   1  -4   7 1309.61 208.750   4
   1   4   8 612.353 171.504  10
  -1  -4  -8 413.512 154.231   7
  -1  -4  -8 444.088 258.286   1
   1  -4   8 134.214 103.695   6
  -1   4  -8 247.416 113.600   3
   1  -4   8 364.870 237.095   3
  -1  -4  -8 449.082 148.155  11
   1  -4   8 291.233 120.812   4
  -1   4  -8 250.675 155.832   1
  -1  -4  -8 584.648 152.516   9
   1   4   8 517.423 214.947   1
   1  -4   8 259.392 129.666   5
   1  -4   9 737.984 152.169   6
   1   4   9 848.081 201.190  10
   1   4   9 662.911 123.785   8
  -1  -4  -9 753.036 271.368   1
  -1  -4  -9 701.289 169.246  11
  -1  -4  -9 853.636 181.722   9
   1   4   9 551.732 197.959   1
   1  -4   9 772.573 252.648   3
  -1   4  -9 1014.96 258.592   3
   1  -4   9 919.951 181.085   5
  -1  -4  -9 457.640 170.219   7
   1  -4   9 928.276 175.154   4
   1  -4  10 214.950 135.382   4
   1   4  10 236.126 153.617   1
  -1  -4 -10 358.228 217.003   1
   1   4  10 475.097 136.705   8
   1  -4  10 256.169 111.597   5
   1  -4  10 308.563 146.038   6
   1   4  10 415.198 147.354  10
  -1  -4 -10 486.426 175.308   7
  -1   4 -10 277.386 169.263   3
   1  -4  10 187.587 142.848   3
   1  -4  11 2352.05 282.767   4
   1  -4  11 2458.49 251.095   6
   1  -4  11 2685.15 491.707   3
   1   4  11 2861.30 274.097   8
  -1   4 -11 2946.57 434.777   3
   1   4  11 2516.22 303.124  10
   1   4  11 2377.85 466.828   1
   1  -4  11 2771.24 284.799   5
  -1  -4 -11 2415.23 283.396   7
  -1  -4 -11 2768.04 532.544   1
   1  -4  12 10098.6 556.804   4
  -1  -4 -12 10997.4 1024.53   1
  -1   4 -12 10764.6 816.934   3
   1   4  12 10822.8 957.571   1
   1  -4  12 9493.26 498.020   6
   1   4  12 8822.94 544.765  10
   1   4  12 9638.83 470.557   8
  -1  -4 -12 9687.43 579.142   7
   1  -4  12 9723.70 508.590   5
   1  -4  12 10817.8 917.310   3
  -1  -4 -13 4443.31 417.408   7
   1  -4  13 4155.79 372.259   5
  -1   4 -13 4812.38 578.734   3
   1  -4  13 4581.04 619.769   3
   1   4  13 4875.80 673.800   1
   1   4  13 4901.28 364.829   8
   1  -4  13 4814.48 415.741   4
  -1  -4 -13 4680.26 685.071   1
   1   4  13 3838.19 373.613  10
   1  -4  13 4502.30 406.591   6
   1  -4  14 2456.75 288.088   5
  -1  -4 -14 2236.62 348.234   7
   1   4  14 2560.15 282.208   8
   1  -4  14 1985.88 456.176   3
  -1   4 -14 2635.95 405.354   3
   1  -4  14 1867.50 301.332   4
   1   4  14 2401.04 520.534   1
   1   4  14 2358.60 343.754  10
  -1  -4 -14 1911.97 530.362   1
   1   4  15 171.348 126.052   8
   1   4  15 52.7896 115.211  10
   1  -4  15 19.9665 132.544   3
  -1   4 -15-69.5796 165.323   3
  -1  -4 -15 180.755 238.978   1
  -1  -4 -15 8.99285 155.748   7
   1   4  15 181.747 181.982   1
   1  -4  15 377.659 136.332   4
   1  -4  15 165.331 132.967   5
   1   4  16 5737.61 666.806   1
   1   4  16 5018.56 444.867  10
  -1  -4 -16 5432.43 480.176   7
   1  -4  16 4980.46 435.695   4
  -1  -4 -16 5412.93 775.428   1
  -1   4 -16 5372.04 533.995   3
   1   4  16 5189.75 369.201   8
   1  -4  16 5069.72 626.273   3
   1  -4  16 4887.67 395.836   5
   1   4  17 237.321 213.595   1
  -1  -4 -17 46.5454 164.895   1
   1  -4  17 131.011 134.318   5
   1  -4  17-6.67730 115.878   4
   1   4  17 168.085 139.832  10
   1   4  17-23.4631 105.600   8
  -1  -4 -17-64.6708 147.384   7
   1  -4  17 485.507 214.640   3
  -1   4 -17 144.616 106.421   3
   1  -4  18 1100.62 228.462   4
   1   4  18 1292.77 343.579   1
  -1   4 -18 1273.35 264.225   3
   1  -4  18 1043.54 222.694   5
   1  -4  18 1359.35 311.557   3
   1   4  18 779.992 181.096   8
   1   4  18 916.204 253.124  10
  -1  -4 -18 775.705 252.277   7
  -1  -4 -18 1203.19 341.732   1
  -1  -4 -19 511.316 198.968   7
   1   4  19 144.153 116.208   8
   1   4  19 442.723 192.583  10
   1   4  19 222.478 129.255   1
  -1  -4 -19-130.377 170.291   1
   1  -4  19 38.3262 118.645   3
   1  -4  19 127.116 152.366   4
   1  -4  19 192.502 121.512   5
   1   4  20 3987.74 438.017  10
   1  -4  20 4500.89 452.084   4
  -1  -4 -20 4025.35 446.802   7
   1   4  20 4038.96 364.948   8
  -1  -4 -20 4208.05 656.648   1
   1  -4  20 4514.55 431.299   5
   1  -4  20 4080.99 549.892   3
   1   4  20 4811.85 654.171   1
   1   4  21 868.740 223.769  10
  -1  -4 -21 1170.19 281.914   7
   1   4  21 971.054 199.432   8
   1  -4  21 1231.32 259.989   5
   1  -4  21 1284.80 259.012   4
   1  -4  22 405.991 186.036   4
  -1  -4 -22 131.690 203.777   7
   1  -4  22 105.433 135.482   5
   1   4  22-246.820 154.859  10
   1   4  22 259.387 170.148   8
  -1  -4 -23 501.456 177.886   7
   1   4  23 434.275 167.402  10
   1  -4  23 652.072 226.555   5
   1   4  23 570.596 171.242   8
   1  -4  23 543.390 201.590   4
   1   4  24 899.888 257.521  10
   1  -4  24 1378.24 285.640   4
  -1  -4 -24 952.536 249.356   7
   1   4  24 923.071 228.971   8
   1  -4  24 1281.53 289.374   5
   1   4  25 279.342 179.795   8
  -1  -4 -25 326.971 165.387   7
   1  -4  25 304.184 183.261   5
   1  -4  25 296.528 191.362   4
   1   4  25 69.9274 149.039  10
   1   4  26 880.260 234.289   8
   1   4  26 1070.49 301.940  10
   1  -4  26 1121.03 252.486   4
   1  -4  26 878.067 215.322   5
  -1  -4 -26 1065.80 306.431   7
  -1  -4 -27 149.270 165.241   7
   1   4  27 109.916 164.435   8
   1  -4  27 204.297 187.588   5
   1   4  27 356.747 205.999  10
   1  -4  27 295.535 223.004   4
   1  -4  28 161.439 140.893   4
   1  -4  28 393.885 248.642   5
  -1  -4 -28 28.3436 153.306   7
   1   4  28 141.677 130.383   8
   1   4  28 147.514 202.676  10
  -1  -4 -29-201.093 183.187   7
   1   4  29-128.369 189.150   8
   1  -4  29 76.8922 158.077   4
   1   4  29 61.9176 162.969  10
   1  -4  29 42.3403 135.629   5
   1   4  30 840.765 314.708  10
  -1  -4 -30 514.141 198.029   7
   1  -4  30 899.853 253.818   4
   1  -4  30 1108.02 307.142   5
   1   4  30 570.464 218.875   8
   1   4  31 399.812 222.510  10
   1  -4  31 556.683 234.516   4
   1  -4  31 210.256 171.151   5
   1   4  31 187.191 183.894   8
   1   4  31 468.262 193.316   5
   1  -4  32 1105.78 296.449   4
   1   4  32 950.437 272.760   8
   1   4  32 514.903 226.936   5
   1  -4  32 244.089 178.221   5
   1   4  33 1311.94 314.236   8
   1   4  33 1437.00 354.372   5
   1  -4  33 1121.42 309.189   5
   1  -4  34 191.686 173.739   5
   1   4  34 318.509 183.192   8
   1   4  34 174.545 164.176   5
   1  -4  35 249.825 209.919   5
   1   4  35 241.054 176.344   5
   1   4  35 365.627 164.433   8
   1   4  36-45.2522 157.583   5
   1   4  36 109.363 182.108   8
   1  -4  36 240.879 276.249   5
   1  -4  37 247.053 265.472   5
   1   4  37-0.20073 180.731   5
   1   4  37 270.104 199.405   8
   1   4  38 167.311 190.287   5
   1   4  38-281.792 149.897   8
   1  -4  38 54.9445 206.600   5
   1  -4  39-660.703 321.201   5
   1   4  39 28.9055 191.530   5
   1   4  40-1.28398 186.664   5
   1  -4  40 230.763 259.712   5
   1   4  41 199.735 154.715   5
   1  -4  41 459.040 199.738   5
   1  -4  42-158.285 254.077   5
   1   4  42-41.2616 129.039   5
   1   4  43-175.525 166.593   5
   1  -4  43 17.2600 226.833   5
  -1   5  42 799.229 247.578   5
  -1  -5  42 937.501 308.117   5
  -1   5  41 163.113 182.349   5
  -1  -5  41 363.047 224.233   5
  -1   5  41 2.63154 165.597   8
  -1  -5  40 144.928 228.984   5
  -1   5  40-349.829 244.908   8
  -1   5  40-8.81445 145.483   5
  -1   5  39-65.9130 138.310   5
  -1   5  39-14.8837 204.285   8
  -1  -5  39 200.072 217.774   5
  -1  -5  38 367.208 224.301   5
  -1   5  38 715.820 264.533   5
  -1   5  38 103.989 219.433   8
  -1  -5  37-125.597 213.735   5
  -1   5  37-373.757 184.389   8
  -1   5  36 258.818 202.465   5
  -1  -5  36 253.260 217.749   5
  -1   5  36 291.699 225.486   8
  -1  -5  35 351.804 253.348   5
  -1   5  35 243.648 165.903   5
  -1  -5  34 711.816 295.400   5
  -1   5  34 761.165 254.595   8
  -1   5  34 121.507 164.585   5
  -1   5  33 194.120 209.440   8
  -1   5  33 168.140 153.474   5
  -1  -5  33 174.128 165.185   5
  -1   5  33 57.1640 168.848  10
  -1   5  32 488.351 225.934   5
  -1  -5  32 609.090 275.623   5
  -1   5  32 468.523 244.342  10
  -1   5  32 31.4815 189.713   8
  -1   5  31 49.0301 161.993   8
  -1   5  31-366.940 200.703  10
  -1  -5  31-181.277 189.164   5
  -1   5  30 656.902 287.452   8
  -1  -5  30 357.313 211.914   5
  -1   5  30 234.019 167.921  10
  -1   5  29 75.5200 161.604  10
  -1   5  29 218.161 208.025   8
  -1  -5  29 478.475 234.487   5
  -1   5  28-26.5004 161.363   8
  -1  -5  28 0.20155 161.585   5
  -1   5  28 141.769 188.651  10
  -1   5  27 60.2319 211.294   8
  -1   5  27 328.586 192.829  10
  -1  -5  27 160.077 208.318   5
  -1   5  26 362.864 206.729   8
  -1  -5  26 165.976 129.839   5
  -1   5  26 102.653 139.626  10
  -1  -5  26 699.891 230.015   4
  -1  -5  25 384.188 210.056   4
  -1   5  25 42.1963 161.542   8
  -1   5  25 174.936 158.015  10
  -1  -5  25 103.655 130.193   5
  -1   5  24 1204.99 294.053  10
  -1  -5  24 1104.63 245.869   4
  -1   5  24 1173.64 273.928   8
  -1  -5  24 1125.83 291.454   5
  -1   5  23 605.738 230.813  10
  -1  -5  23 329.353 211.564   5
  -1   5  23 394.858 192.756   8
  -1  -5  23 133.570 110.213   4
  -1   5  22 343.188 167.707  10
  -1  -5  22 213.816 150.912   5
  -1   5  22 129.692 144.544   8
  -1  -5  22 60.1890 148.495   4
  -1   5  21-61.6334 130.817  10
  -1   5  21-83.8806 128.869   8
  -1  -5  21 224.359 172.103   4
  -1  -5  21 136.040 116.662   5
   1  -5 -21 143.327 187.407   7
  -1  -5  20 860.213 217.479   5
  -1   5  20 909.019 206.318   8
  -1   5  20 738.702 239.880  10
  -1  -5  20 1264.37 254.743   4
   1  -5 -20 943.519 273.845   7
  -1  -5  19 243.179 140.133   5
  -1   5  19 99.4885 119.317  10
  -1  -5  19 536.418 177.029   4
  -1   5  19 511.280 155.163   8
   1  -5 -19 226.074 201.019   7
   1  -5 -18 554.120 234.419   7
  -1  -5  18 828.099 223.943   5
  -1   5  18 480.592 186.229  10
  -1   5  18 991.579 216.618   8
  -1  -5  18 561.367 196.542   4
   1   5 -17 193.089 170.186   3
  -1   5  17 347.068 163.914   8
  -1  -5  17 149.390 170.799   4
   1  -5 -17 593.709 270.027   7
  -1  -5  17 357.391 168.826   5
  -1   5  16 1028.75 226.657  10
   1   5 -16 1185.99 293.307   3
  -1   5  16 1125.63 206.748   8
   1  -5 -16 1398.31 306.519   7
  -1  -5  16 1197.57 265.045   5
  -1  -5  16 1140.27 326.326   3
  -1  -5  16 1413.76 250.478   4
  -1   5  15 9149.11 554.736   8
  -1  -5  15 10050.6 964.585   3
  -1   5  15 8260.14 585.353  10
   1  -5 -15 8816.85 636.032   7
   1   5 -15 9669.03 856.516   3
  -1  -5  15 9274.76 604.491   4
  -1  -5  15 9460.09 600.064   5
   1  -5 -14 468.296 238.639   1
  -1  -5  14-168.991 139.913   3
   1   5 -14-69.3849 161.021   3
  -1  -5  14 450.557 189.002   5
  -1  -5  14 134.145 127.139   4
   1  -5 -14 115.580 163.206   7
  -1   5  14 44.8282 116.956  10
  -1   5  14 343.997 156.203   8
   1  -5 -13 317.335 323.518   1
  -1  -5  13 260.737 204.717   3
  -1  -5  13 386.848 179.865   4
  -1   5  13-7.19163 106.016   8
  -1   5  13 447.206 221.050   1
  -1  -5  13 560.992 214.791   5
   1  -5 -13 158.247 214.815   7
  -1   5  13 213.737 142.284  10
   1   5 -13 339.143 118.552   3
   1   5 -12 21.9562 83.6210  12
   1  -5 -12-112.776 163.407   7
  -1  -5  12 102.732 170.092   3
   1  -5 -12 520.577 300.881   1
  -1  -5  12 178.433 131.801   5
  -1  -5  12 92.7950 123.637   4
  -1   5  12 44.0328 114.729  10
   1   5 -12-50.2705 125.768   3
  -1   5  12 50.7001 190.156   1
  -1   5  12 99.2662 155.760   8
   1   5 -11 687.237 129.173  12
  -1  -5  11 772.891 207.733   4
   1  -5 -11 645.387 335.291   1
  -1  -5  11 694.872 185.037   5
  -1   5  11 467.377 159.648  10
  -1   5  11 711.921 185.868   8
   1   5 -11 766.597 268.126   3
  -1  -5  11 538.360 229.841   3
  -1   5  11 265.511 235.156   1
   1  -5 -11 634.088 191.705   7
   1  -5 -10 314.945 167.245   1
   1  -5 -10 933.542 245.987   7
   1   5 -10 214.543 144.888   3
   1   5 -10 282.221 106.793  12
  -1   5  10 312.464 155.095  10
  -1   5  10 409.756 198.634   1
  -1  -5  10 656.125 215.266   4
  -1   5  10 353.020 165.078   8
   1  -5 -10 190.123 146.471  11
  -1  -5  10 507.386 185.297   5
  -1  -5  10 440.891 204.426   3
   1   5  -9 161.865 131.964   3
   1  -5  -9 107.075 161.730   7
   1   5  -9-69.9196 79.8162  12
   1  -5  -9 6.42824 129.802  11
  -1  -5   9 80.8387 181.148   3
  -1   5   9 102.430 156.722  10
  -1  -5   9 190.267 134.246   5
  -1   5   9-7.94245 230.958   1
  -1  -5   9 237.014 146.167   4
   1  -5  -9 48.5458 90.6558   6
   1  -5  -9 45.9597 189.224   1
   1   5  -8 275.978 98.8079  12
  -1  -5   8 546.967 171.090   4
  -1  -5   8 472.545 128.049   6
   1  -5  -8 568.224 144.704   6
   1  -5  -8 452.922 188.717  11
   1  -5  -8 740.353 358.107   1
  -1  -5   8 416.286 219.938   3
  -1  -5   8 406.657 148.256   9
  -1  -5   8 607.198 186.254   5
  -1   5   8 348.848 148.810  10
   1  -5  -8 526.747 197.338   7
  -1   5   8 702.787 127.320   2
   1   5  -8 582.268 201.248   3
  -1   5   8 856.499 341.620   1
   1   5  -8 635.470 308.268   1
  -1  -5   7 1292.40 226.114   5
  -1  -5   7 1032.69 171.912   9
  -1   5   7 1377.49 398.493   1
   1  -5  -7 1097.00 164.620   6
  -1  -5   7 900.062 192.116   4
   1   5  -7 1259.45 403.869   1
  -1   5   7 1041.92 170.804   2
   1  -5  -7 1149.49 235.067  11
  -1   5   7 1176.33 231.490  10
  -1  -5   7 1223.03 168.087   6
   1  -5  -7 1322.00 242.140   7
   1   5  -7 1110.00 283.411   3
   1  -5  -7 1600.07 446.103   1
  -1  -5   6 6366.99 331.949   6
  -1   5   6 8816.22 931.690   1
   1  -5  -6 6132.01 331.020   6
  -1   5   6 6248.63 451.502  10
   1  -5  -6 6624.52 470.128   7
  -1  -5   6 7072.31 475.940   5
  -1   5   6 8068.29 493.857   2
   1   5  -6 8237.72 822.088   3
   1   5  -6 9049.41 1010.85   1
   1  -5  -6 6088.49 487.946  11
  -1  -5   6 8255.32 544.325   4
   1  -5  -6 8632.75 932.844   1
  -1  -5   6 5959.26 395.223   9
   1  -5  -6 6657.52 413.105   9
   1  -5  -5-83.5107 87.3896   6
   1   5  -5-151.679 175.941   3
  -1   5   5 162.013 117.994   2
  -1   5   5 168.791 118.372  10
  -1   5   5 99.3702 245.808   1
   1  -5  -5-25.8898 146.501   7
  -1  -5   5 22.3480 69.7213   6
  -1  -5   5 156.171 125.336   5
  -1  -5   5 120.847 104.708   9
   1  -5  -5 142.471 216.141   1
   1   5  -5-63.4994 209.329   1
  -1  -5   5-8.50440 114.132   4
   1  -5  -5 53.7621 134.296  11
  -1   5   5 66.9489 199.004   3
   1  -5  -5 181.703 92.2766   9
  -1   5   4 545.575 312.712   3
   1   5  -4 432.927 309.708   1
  -1  -5   4 465.021 158.633   9
   1  -5  -4 505.970 197.619  11
  -1   5   4 725.018 370.784   1
  -1  -5   4 158.574 123.513   4
   1  -5  -4 172.595 99.8548   6
  -1  -5   4 142.527 109.135   7
   1  -5  -4 534.078 153.105   9
  -1  -5   4 318.816 113.610   6
  -1  -5   4 339.745 157.084   5
  -1  -5   4 260.031 128.073  11
   1   5  -4 610.506 299.947   3
   1   5  -3 1392.92 380.677   3
  -1  -5   3 1079.90 169.141   9
   1  -5  -3 1194.72 177.620   9
   1  -5  -3 1295.86 231.164  11
   1   5  -3 1006.56 359.698   1
  -1   5   3 1214.18 366.954   1
  -1   5   3 1011.75 307.886   3
  -1  -5   3 1034.84 125.371   6
   1  -5  -3 977.931 138.024   6
  -1  -5   3 1076.96 198.705  11
  -1  -5   3 1279.26 172.893   7
   1   5  -2 5320.75 684.165   3
  -1  -5   2 4600.09 338.744   9
  -1  -5   2 4402.53 232.118   6
  -1   5   2 5614.53 745.951   1
   1  -5  -2 4457.52 275.724   6
  -1   5   2 5449.41 700.797   3
   1  -5  -2 4642.36 407.707  11
   1  -5  -2 4152.92 305.841   9
   1   5  -2 5026.77 722.799   1
  -1  -5   2 4549.36 344.634   7
  -1  -5   2 4240.00 405.464  11
  -1   5   1 436.644 276.969   3
  -1  -5   1-203.191 129.229   7
  -1   5   1 33.9896 199.116   1
  -1  -5   1 97.3150 95.4807   9
  -1  -5   1-11.5704 55.4215   6
   1   5  -1 65.3591 238.340   3
  -1  -5   1 14.8695 102.500  11
   1  -5  -1 34.0499 86.5171   9
   1   5  -1 461.295 306.758   1
   1  -5  -1 54.7590 101.338  11
   1  -5  -1 10.0121 78.2447   6
  -1  -5   0 2746.23 273.476   7
   1   5   0 2767.78 527.970   3
   1   5   0 2963.35 568.434   1
  -1   5   0 2877.38 545.798   3
   1  -5   0 3390.83 343.397  11
   1  -5   0 3052.11 232.143   6
  -1  -5   0 3446.93 292.654   9
   1  -5   0 3444.15 269.661   9
  -1  -5   0 2973.09 174.774   6
  -1  -5   0 4016.16 376.166  11
  -1   5   0 2892.67 543.015   1
   1  -5   0 2745.07 313.162   4
   1  -5   1 3883.59 284.404   9
  -1   5  -1 3972.83 658.579   1
  -1  -5  -1 4498.75 336.302   9
   1   5   1 4192.28 653.841   1
   1  -5   1 4006.72 366.964   4
   1   5   1 4161.18 634.114   3
   1  -5   1 3956.25 392.757  11
  -1   5  -1 3594.97 552.016   3
  -1  -5  -1 4293.08 389.005  11
  -1  -5  -1 3892.82 329.214   7
   1  -5   1 4131.63 273.208   6
  -1  -5  -2 2389.75 273.342   7
   1  -5   2 2253.78 294.814  11
  -1   5  -2 2088.48 446.262   3
   1   5   2 2100.35 478.091   1
  -1  -5  -2 2384.45 302.934  11
   1  -5   2 2252.10 285.194   4
  -1   5  -2 1982.78 504.182   1
  -1  -5  -2 2338.30 256.529   9
   1  -5   2 2134.49 215.349   9
   1  -5   2 2176.93 210.035   6
   1   5   2 2050.80 451.635   3
  -1  -5  -3 7788.00 531.745  11
   1  -5   3 8436.24 555.247  11
  -1   5  -3 9497.25 1003.97   1
   1  -5   3 9609.68 581.632   4
   1   5   3 10239.0 1000.11   3
   1  -5   3 8767.57 415.129   6
   1  -5   3 8925.87 411.719   9
  -1  -5  -3 8877.58 480.557   9
   1  -5   3 9351.55 491.174   5
   1   5   3 10150.7 1054.93   1
  -1  -5  -3 8292.69 490.010   7
  -1   5  -3 9821.07 900.288   3
   1  -5   4 233.376 119.086   5
   1  -5   4 389.722 191.560   4
  -1  -5  -4 91.4644 130.838  11
   1  -5   4 85.9226 91.1791   6
   1  -5   4 13.6184 106.501  11
   1   5   4 230.754 163.890   1
   1  -5   4-34.0912 61.6880   9
  -1  -5  -4-14.3124 76.9218   9
   1   5   4-80.1263 258.700   3
  -1  -5  -4 142.236 125.481   7
  -1   5  -4 44.8781 160.372   1
  -1   5  -4 312.988 207.988   3
   1  -5   5 1150.91 165.034   9
  -1  -5  -5 1017.52 202.060   7
  -1   5  -5 1099.36 296.541   3
  -1  -5  -5 1336.11 252.226  11
   1  -5   5 1622.83 264.315   4
   1   5   5 1502.58 418.691   1
   1  -5   5 1285.11 237.476  11
   1   5   5 1310.98 354.875   3
   1  -5   5 1333.87 199.299   5
   1  -5   5 1249.61 190.025   6
  -1  -5  -5 1281.62 208.463   9
  -1   5  -5 1507.63 452.710   1
   1  -5   6 1825.44 244.133   5
  -1  -5  -6 1754.43 295.114   7
   1  -5   6 1639.62 267.910   4
   1  -5   6 1375.46 195.131   6
  -1   5  -6 1511.95 376.078   3
   1  -5   6 1796.01 200.117   9
   1  -5   6 2104.15 311.718  11
  -1   5  -6 1230.02 443.728   1
   1   5   6 1643.65 391.795   3
  -1  -5  -6 1830.75 245.042   9
   1   5   6 1955.96 271.774  10
   1   5   6 1892.50 453.928   1
  -1  -5  -6 2051.72 297.163  11
   1  -5   7 3958.67 339.036   5
   1  -5   7 3809.46 284.688   9
  -1   5  -7 4332.55 579.679   3
   1   5   7 3830.70 387.534  10
   1   5   7 4567.50 691.118   3
  -1  -5  -7 3984.24 400.862  11
   1  -5   7 4188.95 400.720   4
  -1   5  -7 4502.24 731.497   1
  -1  -5  -7 3508.79 351.956   7
   1  -5   7 3684.65 296.241   6
   1   5   7 4082.28 656.933   1
  -1  -5  -7 3857.67 350.307   9
   1   5   8 630.964 177.185  10
  -1  -5  -8 203.478 145.146   7
   1   5   8 651.889 311.288   3
   1   5   8 457.196 264.632   1
  -1   5  -8 587.971 256.271   3
  -1   5  -8 389.902 247.711   1
   1  -5   8 478.102 139.299   6
  -1  -5  -8 625.709 184.805  11
  -1  -5  -8 681.827 177.970   9
   1  -5   8 487.058 141.036   5
   1  -5   8 644.983 220.699   4
   1  -5   8 559.000 138.734   9
   1   5   9 1690.91 418.827   1
   1  -5   9 1547.41 264.204   4
  -1  -5  -9 1481.74 278.902  11
   1  -5   9 1591.79 232.033   5
   1  -5   9 1378.53 177.317   9
   1  -5   9 1814.77 254.558   6
   1   5   9 1501.83 233.335   8
  -1   5  -9 1676.99 371.602   3
  -1   5  -9 1425.01 436.659   1
   1   5   9 1158.59 327.722   3
  -1  -5  -9 1294.37 392.574   1
   1   5   9 1131.16 216.690  10
  -1  -5  -9 1881.89 310.474   7
  -1  -5  -9 1535.77 254.889   9
  -1  -5 -10-151.832 191.534   1
   1  -5  10-65.5538 120.489   6
   1   5  10 226.614 116.142   8
   1   5  10-59.4422 118.261  10
  -1   5 -10-196.639 217.529   3
  -1  -5 -10-15.3394 152.378   7
   1  -5  10 48.8301 82.5448   9
  -1   5 -10-98.9788 155.948   1
   1  -5  10 70.2645 106.300   5
   1  -5  10 97.3831 146.920   4
   1   5  10 86.9354 239.661   1
  -1   5 -11 1494.84 345.307   3
   1  -5  11 1428.36 250.826   5
   1  -5  11 1250.20 217.875   6
   1   5  11 1112.20 189.126   8
   1   5  11 1052.58 238.961  10
   1   5  11 1225.89 317.772   1
  -1  -5 -11 1249.22 381.948   1
   1  -5  11 1350.38 253.482   4
  -1   5 -11 1518.10 451.773   1
  -1  -5 -11 1197.54 260.883   7
   1   5  12 2073.23 448.526   1
  -1   5 -12 1694.11 318.126   3
   1   5  12 1541.34 279.693  10
   1  -5  12 1814.07 254.784   5
   1   5  12 1267.34 203.506   8
   1  -5  12 1922.19 281.762   4
  -1  -5 -12 2581.06 553.742   1
  -1  -5 -12 1313.58 284.201   7
   1  -5  12 1478.20 226.811   6
  -1   5 -12 1898.63 457.508   1
  -1   5 -13 1740.36 461.374   1
   1   5  13 1761.29 288.164  10
  -1  -5 -13 1674.44 289.805   7
   1   5  13 1767.65 233.963   8
  -1   5 -13 1999.66 386.444   3
   1  -5  13 1855.17 424.565   3
   1  -5  13 1815.86 250.090   5
   1   5  13 2057.82 426.406   1
   1  -5  13 1653.28 266.817   6
   1  -5  13 1938.61 293.858   4
  -1  -5 -13 1667.65 474.145   1
   1  -5  14 2202.02 297.951   5
  -1  -5 -14 1959.51 447.965   1
   1  -5  14 1896.23 412.378   3
  -1   5 -14 2767.91 565.903   1
   1  -5  14 2166.24 309.936   4
   1   5  14 2020.39 300.394  10
   1   5  14 1888.29 244.063   8
  -1   5 -14 2439.31 412.852   3
  -1  -5 -14 1844.52 290.207   7
   1   5  14 2672.40 530.395   1
  -1  -5 -15-1.84370 178.738   1
   1  -5  15 328.311 205.720   3
   1  -5  15-84.0988 150.760   4
  -1   5 -15 199.980 95.2262   3
   1   5  15 410.569 143.305   8
   1   5  15 79.6995 162.207   1
   1   5  15 597.981 220.687  10
  -1  -5 -15 417.238 213.579   7
   1  -5  15 232.309 142.239   5
   1  -5  16 387.280 158.729   5
   1   5  16 140.885 103.637   8
   1   5  16 27.9866 125.237  10
  -1   5 -16 228.143 139.507   3
  -1  -5 -16 8.08761 190.111   7
   1  -5  16 363.063 178.081   4
   1  -5  16-209.101 207.883   3
   1  -5  17 847.845 259.496   4
  -1  -5 -17 808.303 250.123   7
   1   5  17 496.658 194.151   8
   1  -5  17 675.146 246.214   5
   1  -5  17 531.841 280.607   3
  -1   5 -17 472.083 171.377   3
   1   5  17 353.139 149.857  10
  -1  -5 -18 68.5492 188.959   7
   1   5  18 270.016 145.140   8
   1  -5  18 129.525 149.026   5
   1  -5  18 2.76501 139.986   4
   1   5  18 149.163 165.257  10
   1   5  19 7390.86 517.318   8
   1   5  19 7054.92 611.031  10
  -1  -5 -19 7071.38 657.051   7
   1  -5  19 7198.35 576.549   5
   1  -5  19 7820.05 612.938   4
   1  -5  20 78.1030 126.675   4
  -1  -5 -20-89.7511 188.208   7
   1   5  20 246.617 183.644  10
   1   5  20 25.4640 116.352   8
   1  -5  20 78.4972 119.818   5
   1   5  21 1108.51 207.735   8
   1  -5  21 1243.68 253.867   5
  -1  -5 -21 1429.17 307.807   7
   1   5  21 995.863 272.665  10
   1  -5  21 1085.03 256.452   4
   1  -5  22 6985.20 575.348   5
  -1  -5 -22 7283.58 654.054   7
   1   5  22 7530.23 551.627   8
   1  -5  22 7470.82 639.415   4
   1   5  22 6567.15 623.734  10
   1   5  23 274.927 172.628   8
   1  -5  23 235.086 148.644   5
   1   5  23 303.277 216.318  10
   1  -5  23 507.845 231.362   4
  -1  -5 -23 284.048 169.426   7
   1   5  24 701.222 223.629   8
   1  -5  24 547.956 208.373   5
   1   5  24 496.040 202.526  10
  -1  -5 -24 978.893 290.853   7
   1  -5  24 890.544 279.849   4
   1  -5  25 854.216 250.108   5
   1   5  25 1548.26 341.549  10
  -1  -5 -25 901.628 238.158   7
   1  -5  25 1364.03 303.512   4
   1   5  25 1159.77 277.252   8
   1  -5  26 301.337 186.504   4
   1   5  26 124.472 212.292  10
  -1  -5 -26-321.781 241.039   7
   1   5  26-132.574 211.322   8
   1  -5  26-37.2732 125.985   5
   1  -5  27 313.401 211.829   5
   1   5  27 128.378 163.499  10
   1  -5  27 417.089 221.426   4
  -1  -5 -27 264.478 207.796   7
   1   5  27 35.1031 133.968   8
  -1  -5 -28 467.900 237.445   7
   1   5  28 630.681 227.567   8
   1  -5  28 569.434 224.978   5
   1   5  28 480.466 234.588  10
   1  -5  28 464.050 246.609   4
   1  -5  29 23.6677 207.206   5
   1   5  29 177.430 180.130   8
   1   5  29-25.1666 176.146  10
   1  -5  29 20.1103 164.560   4
   1  -5  30-142.792 208.606   4
   1  -5  30 165.114 216.076   5
   1   5  30 383.159 270.039   8
   1   5  30-161.452 203.432  10
   1  -5  31 369.780 198.538   4
   1   5  31 256.470 234.535  10
   1   5  31 513.801 246.794   8
   1  -5  31 142.261 147.418   5
   1   5  32 191.934 186.664   8
   1   5  32 183.115 175.572  10
   1  -5  32 262.685 214.762   5
   1   5  33 167.302 210.894   8
   1   5  33 231.823 259.740  10
   1   5  33 502.655 189.754   5
   1  -5  33 72.2027 185.653   5
   1   5  34 78.5929 175.453   5
   1   5  34-18.9476 208.441   8
   1  -5  34 92.5315 157.938   5
   1   5  35 135.934 155.399   8
   1  -5  35 397.261 269.026   5
   1   5  35 248.326 167.827   5
   1   5  36 746.564 253.009   5
   1   5  36 443.430 196.580   8
   1  -5  36 1134.11 355.324   5
   1  -5  37 141.352 235.301   5
   1   5  37 239.543 128.761   5
   1  -5  38-18.2084 169.266   5
   1   5  38-256.432 167.396   5
   1   5  39 65.1154 153.813   5
   1  -5  39 474.694 268.164   5
   1   5  40-141.838 212.280   5
   1  -5  40-276.887 221.392   5
   1  -5  41-876.727 310.408   5
   1   5  41-87.0621 129.144   5
  -1  -6  41-215.204 207.438   5
  -1   6  40 550.295 241.250   8
  -1  -6  40 247.378 184.557   5
  -1   6  40 508.225 207.830   5
  -1   6  39-52.4375 150.210   5
  -1  -6  39 311.247 252.644   5
  -1   6  39-37.4928 243.458   8
  -1   6  38 17.0318 129.906   5
  -1   6  38 76.0264 176.549   8
  -1   6  37 270.169 137.636   5
  -1   6  37 337.626 226.232   8
  -1  -6  37 360.494 247.759   5
  -1  -6  36-78.1817 234.200   5
  -1   6  36 170.400 167.229   5
  -1   6  36-76.0799 180.535   8
  -1   6  35 391.038 192.173   5
  -1  -6  35 121.500 188.872   5
  -1   6  34 664.976 240.669   5
  -1   6  34 649.551 311.249   8
  -1  -6  34 422.192 293.086   5
  -1   6  34 368.713 296.731  10
  -1  -6  33 419.919 270.377   5
  -1   6  33 351.083 253.964  10
  -1   6  33 593.122 263.932   8
  -1   6  33 362.960 174.153   5
  -1   6  32 575.125 279.935  10
  -1   6  32-50.8586 198.316   8
  -1  -6  32 568.637 285.574   5
  -1   6  31 930.488 311.202  10
  -1  -6  31 626.039 288.358   5
  -1   6  31 474.654 262.004   8
  -1   6  30-50.9248 174.040   8
  -1  -6  30 87.3435 220.290   5
  -1   6  30 308.875 187.355  10
  -1   6  29 55.8300 168.491  10
  -1  -6  29 241.085 174.819   5
  -1   6  29 346.031 215.491   8
  -1  -6  28 199.594 213.210   5
  -1   6  28 74.2663 165.420   8
  -1   6  28 93.0432 203.978  10
  -1   6  27 26.7029 156.759  10
  -1  -6  27 254.313 227.993   5
  -1   6  27 74.4784 152.336   8
  -1   6  26 1593.25 325.880   8
  -1  -6  26 1487.30 374.734   5
  -1   6  26 1240.37 324.911  10
  -1   6  25 106.180 167.505  10
  -1  -6  25 319.378 209.680   5
  -1   6  25 327.767 187.600   8
  -1  -6  25 118.450 151.452   4
  -1   6  24 199.575 169.527   8
  -1  -6  24-115.693 157.700   5
  -1  -6  24 319.988 139.858   4
  -1   6  24 33.1877 157.512  10
  -1  -6  23 1252.21 295.438   4
  -1   6  23 925.682 240.567   8
  -1   6  23 701.704 209.703  10
  -1  -6  23 792.791 267.411   5
  -1  -6  22 493.636 190.137   4
  -1   6  22 399.173 216.126  10
  -1   6  22 409.982 174.205   8
  -1  -6  22 174.916 172.958   5
  -1  -6  21 0.16970 175.275   4
  -1   6  21 235.017 194.994  10
  -1   6  21 312.600 128.700   8
  -1  -6  21 179.642 168.957   5
  -1  -6  20 365.963 175.560   5
  -1   6  20 188.657 204.634  10
  -1   6  20 60.2089 135.385   8
  -1  -6  20 431.359 185.896   4
  -1  -6  19 1201.27 286.367   5
  -1   6  19 1037.03 279.066  10
  -1  -6  19 1269.90 291.333   4
  -1   6  19 1440.21 275.816   8
  -1   6  18 339.147 201.224  10
  -1   6  18 463.008 171.107   8
  -1  -6  18 288.593 140.522   5
  -1  -6  18 341.656 158.016   4
  -1   6  17 1888.19 300.363   8
  -1   6  17 1808.51 339.203  10
  -1  -6  17 2011.17 327.949   5
  -1  -6  17 2412.98 360.640   4
  -1  -6  16 1289.37 264.048   4
  -1   6  16 1249.65 277.066  10
  -1   6  16 1313.38 276.503   8
  -1  -6  16 1408.71 295.238   5
  -1   6  15 545.493 174.775   8
  -1  -6  15 598.666 209.408   4
  -1  -6  15 624.741 220.873   5
  -1   6  15 419.690 150.531  10
  -1   6  14 1972.23 301.237   8
  -1   6  14 1893.69 325.134  10
   1  -6 -14 1682.23 214.977   6
  -1  -6  14 2226.51 331.589   5
  -1  -6  14 2327.80 348.571   4
  -1  -6  13 1810.46 271.847   9
  -1   6  13 1493.64 295.876  10
  -1  -6  13 2380.10 352.966   4
   1  -6 -13 1634.54 202.029   6
  -1  -6  13 2326.74 352.722   5
   1  -6 -13 1456.78 337.137   7
  -1   6  13 1530.14 275.679   8
  -1  -6  12 120.068 89.7255   9
  -1  -6  12 113.207 134.583   5
  -1  -6  12 88.1338 139.100   4
   1  -6 -12 26.3783 90.8739   6
  -1   6  12-253.895 137.598   8
  -1   6  12 250.787 157.683  10
   1  -6 -11 252.167 85.6899   6
  -1   6  11 319.161 155.749  10
  -1  -6  11 354.600 145.045   9
  -1   6  11 403.004 184.054   8
  -1  -6  11 335.665 137.854   5
  -1  -6  11 189.016 152.730   4
  -1   6  10 822.523 245.526  10
  -1  -6  10 950.148 235.535   5
  -1   6  10 793.322 202.827   8
   1  -6 -10 1035.49 164.282   6
  -1  -6  10 805.604 194.248   9
  -1  -6  10 1523.90 302.635   4
   1  -6 -10 942.128 276.017  11
  -1  -6   9 5304.02 486.823   4
   1  -6  -9 4892.16 504.373  11
   1  -6  -9 4488.44 300.996   6
  -1  -6   9 4938.11 407.398   9
  -1   6   9 4891.90 459.215  10
  -1  -6   9 5518.68 491.493   5
  -1  -6   8 886.392 189.299   9
  -1   6   8 784.913 207.493  10
  -1  -6   8 1697.70 316.671   4
   1   6  -8 1055.62 301.964   3
   1  -6  -8 865.646 264.789  11
   1  -6  -8 822.176 145.989   6
  -1  -6   8 950.042 223.268   5
  -1  -6   7 887.203 213.716   5
   1   6  -7 1120.15 331.229   3
  -1  -6   7 404.337 168.134  11
   1  -6  -7 571.821 118.859   6
  -1  -6   7 509.495 157.440   9
  -1  -6   7 719.943 158.838   6
  -1  -6   7 1101.24 254.541   4
   1  -6  -7 519.858 175.204  11
  -1   6   7 936.016 205.009  10
  -1  -6   6 260.510 112.482   6
   1  -6  -6 418.693 173.927  11
  -1   6   6 230.422 106.788   2
  -1  -6   6 308.119 161.088   5
  -1  -6   6 283.323 186.408  11
   1  -6  -6 162.902 100.677   6
  -1  -6   6 128.618 103.814   9
   1   6  -6 204.985 170.413   3
  -1   6   6 359.375 162.159  10
  -1  -6   6 136.511 192.874   4
   1  -6  -6 237.449 129.515   9
  -1  -6   5 1831.56 261.371   9
   1  -6  -5 1771.02 337.744  11
  -1  -6   5 1771.97 318.317  11
   1  -6  -5 1926.76 259.597   9
  -1   6   5 2218.24 320.624   2
   1  -6  -5 2078.16 209.202   6
  -1  -6   5 2233.09 227.568   6
  -1   6   5 1832.71 309.249  10
   1   6  -5 3046.86 558.021   3
  -1  -6   4 1275.93 165.065   6
   1  -6  -4 1356.53 185.547   6
   1   6  -4 1393.19 363.090   3
  -1   6   4 1397.13 268.421   2
   1  -6  -4 1324.85 220.514   9
  -1  -6   4 1298.73 230.866   9
  -1  -6   4 1359.23 297.081  11
  -1   6   4 1232.91 332.309   3
  -1   6   4 1533.46 277.324  10
   1  -6  -4 1470.68 317.102  11
   1  -6  -3 39.8032 113.476   9
  -1  -6   3-61.7193 136.015  11
  -1  -6   3 136.160 112.371   9
   1   6  -3-230.503 222.313   3
   1  -6  -3 105.970 85.4068   6
  -1   6   3-114.471 175.217   2
  -1  -6   3 154.384 103.689   6
  -1   6   3-492.563 359.983   3
   1  -6  -3 197.442 166.357  11
  -1  -6   2 2610.13 305.257   7
  -1   6   2 2131.83 420.691   3
   1  -6  -2 2314.03 217.650   6
   1  -6  -2 2358.95 266.870   9
   1  -6  -2 2424.23 348.332  11
   1   6  -2 2849.09 524.457   3
  -1  -6   2 2297.98 250.567   9
  -1  -6   2 2184.74 325.661  11
  -1  -6   2 2451.53 191.840   6
   1  -6  -1 433.268 169.510  11
   1  -6  -1 320.086 97.3313   6
  -1  -6   1 397.003 146.761   9
   1   6  -1 329.435 219.146   3
  -1  -6   1 541.128 205.865   7
  -1  -6   1 607.497 209.438  11
  -1   6   1-162.803 271.563   3
   1  -6  -1 397.288 135.971   9
  -1  -6   0 3026.93 332.263   7
   1  -6   0 3473.98 393.374  11
  -1  -6   0 3355.56 386.219  11
  -1   6   0 3402.09 576.400   3
  -1  -6   0 3051.48 313.484   9
   1   6   0 3694.46 602.148   3
   1  -6   0 3220.97 269.590   6
   1  -6   0 3250.10 295.803   9
  -1  -6  -1 966.053 222.958  11
   1  -6   1 919.745 174.119   6
  -1  -6  -1 953.620 206.992   9
   1  -6   1 674.136 194.738   4
   1  -6   1 957.567 193.845   9
  -1  -6  -1 890.618 226.741   7
   1  -6   1 813.282 212.753  11
  -1   6  -1 849.639 320.448   3
   1   6   1 1005.47 360.073   3
   1  -6   2 454.742 213.676   4
   1   6   2 324.383 211.952   3
  -1  -6  -2 560.183 165.156   9
   1  -6   2 565.656 144.158   9
   1  -6   2 367.307 115.910   6
  -1   6  -2 410.992 253.009   3
  -1  -6  -2 636.143 211.450  11
   1  -6   2 728.567 227.969  11
  -1  -6  -2 394.887 182.177   7
   1  -6   3 3989.21 305.763   6
  -1  -6  -3 4316.64 432.416  11
  -1  -6  -3 4276.65 379.788   9
  -1  -6  -3 4654.60 414.859   7
   1  -6   3 4627.58 466.469   4
  -1   6  -3 3991.01 628.038   3
   1  -6   3 4406.85 459.847  11
   1  -6   3 4257.56 339.007   9
   1  -6   4 1542.08 227.303   6
  -1  -6  -4 1718.32 292.337   9
   1  -6   4 1113.10 283.096  11
   1  -6   4 1406.07 225.649   9
  -1   6  -4 2257.56 491.747   3
  -1  -6  -4 2000.12 344.116  11
  -1  -6  -4 2464.74 360.315   7
   1  -6   4 1807.89 365.634   4
  -1  -6  -5 328.170 154.964   7
  -1  -6  -5 207.226 145.596   9
  -1  -6  -5 190.564 183.715  11
   1  -6   5 153.490 164.861  11
   1  -6   5 71.8459 196.641   4
   1   6   5 495.290 194.681  10
   1  -6   5-138.195 103.869   6
   1  -6   5-22.6066 95.7790   9
   1  -6   5 43.3366 118.839   5
  -1   6  -5 54.6729 217.447   3
   1  -6   6 507.880 159.913   6
  -1  -6  -6 651.835 181.659   9
   1   6   6 551.713 213.878  10
   1  -6   6 634.098 143.133   9
   1  -6   6 983.744 295.973  11
   1  -6   6 441.477 212.539   4
  -1  -6  -6 505.673 172.771  11
  -1   6  -6 356.541 220.738   3
  -1  -6  -6 666.368 225.850   7
   1  -6   6 567.973 182.989   5
   1  -6   7 5384.43 385.007   6
  -1  -6  -7 4965.56 441.928   9
  -1   6  -7 6245.34 714.636   3
  -1  -6  -7 5869.52 509.232   7
  -1  -6  -7 5043.49 502.597  11
   1   6   7 4611.25 454.405  10
   1  -6   7 5929.44 458.637   5
   1  -6   7 4991.07 355.834   9
   1  -6   7 5861.70 521.397   4
   1  -6   7 5079.39 544.963  11
   1  -6   8 653.733 120.219   9
   1  -6   8 634.649 166.532   5
   1  -6   8 566.781 145.638   6
  -1  -6  -8-13.8409 209.226   7
  -1  -6  -8 570.253 148.733   9
   1  -6   8 646.729 214.783  11
   1   6   8 623.571 209.789  10
   1  -6   8 775.769 275.559   4
  -1   6  -8 250.361 134.816   3
  -1  -6  -8 376.075 160.760  11
  -1  -6  -9 1127.42 264.785   7
   1  -6   9 809.794 270.970  11
   1  -6   9 888.873 224.761   4
   1  -6   9 1053.30 226.928   5
   1   6   9 629.091 211.983  10
   1  -6   9 1136.72 219.939   6
  -1   6  -9 1150.81 324.860   3
   1  -6   9 784.105 165.302   9
  -1  -6  -9 628.391 224.596  11
  -1  -6  -9 965.437 211.650   9
  -1   6 -10 237.404 177.656   3
   1   6  10 448.366 154.273   8
   1  -6  10 544.495 213.857   4
   1  -6  10 335.528 179.293   6
  -1  -6 -10 241.233 134.948  11
   1  -6  10 254.742 139.113   5
   1   6  10 532.176 209.989  10
  -1  -6 -10 910.815 281.369   7
   1  -6  10 425.212 133.691   9
  -1   6 -11 2806.26 490.451   3
   1  -6  11 2608.41 380.431   4
   1  -6  11 2358.05 302.545   6
   1  -6  11 2438.09 257.738   9
   1  -6  11 2434.94 324.666   5
  -1  -6 -11 2402.97 364.743   7
   1   6  11 2175.33 286.234   8
   1   6  11 2303.59 344.231  10
  -1   6 -12 2757.17 461.119   3
   1  -6  12 3029.66 411.405   4
  -1  -6 -12 2618.65 381.850   7
   1   6  12 2099.69 321.833  10
   1  -6  12 2503.26 264.374   9
   1   6  12 2429.19 294.200   8
   1  -6  12 2550.01 316.890   6
   1  -6  12 2776.22 331.368   5
   1  -6  13 3750.73 399.953   5
   1  -6  13 3574.27 316.132   9
   1   6  13 3668.34 371.371   8
   1   6  13 3659.49 443.654  10
   1  -6  13 3786.20 449.533   4
  -1  -6 -13 4182.94 501.640   7
   1  -6  14 132.902 116.186   5
  -1  -6 -14 113.638 208.018   7
   1   6  14-261.299 174.432  10
   1  -6  14 43.7481 136.362   4
   1  -6  14 71.5363 99.5982   9
   1   6  14 212.959 134.426   8
   1  -6  15 658.344 238.297   4
   1  -6  15 372.619 166.561   5
   1  -6  15 269.817 115.536   9
   1   6  15 539.016 222.355  10
   1   6  15 452.164 181.782   8
  -1  -6 -15 581.899 338.467   7
   1  -6  16 28.0588 85.0597   9
   1   6  16 206.579 162.800   8
   1   6  16 164.627 160.129  10
   1  -6  16 334.300 207.711   4
   1  -6  16 160.626 112.551   5
  -1  -6 -16 133.622 192.261   7
   1   6  17 1426.32 246.073   8
   1  -6  17 1488.14 335.397   4
   1   6  17 1591.95 324.548  10
  -1  -6 -17 1579.93 407.559   7
   1  -6  17 1290.44 274.100   5
   1  -6  18 584.169 222.114   4
   1   6  18 433.007 190.785  10
   1  -6  18 220.088 156.023   5
  -1  -6 -18 676.919 281.508   7
   1   6  18 247.571 125.078   8
   1   6  19 658.305 205.836   8
   1  -6  19 333.516 211.298   4
   1  -6  19 436.798 182.316   5
   1   6  19 379.169 217.683  10
  -1  -6 -19 446.002 207.243   7
   1   6  20 725.695 267.618  10
  -1  -6 -20 949.069 323.418   7
   1  -6  20 1130.63 266.881   5
   1   6  20 786.648 214.744   8
   1  -6  20 954.386 262.359   4
   1   6  21 1179.72 257.955   8
   1   6  21 1381.57 297.492  10
   1  -6  21 1458.24 319.676   5
   1  -6  21 1398.94 300.670   4
  -1  -6 -21 1240.77 307.643   7
   1  -6  22 168.648 201.616   5
   1   6  22 307.278 206.965   8
  -1  -6 -22 365.882 259.078   7
   1   6  22 61.6778 165.623  10
   1  -6  22 524.076 269.472   4
   1   6  23 232.923 198.196  10
   1   6  23 258.260 144.856   8
   1  -6  23 116.304 182.971   4
   1  -6  23 246.706 136.520   5
  -1  -6 -23-73.8168 191.334   7
   1   6  24 536.103 160.166   8
  -1  -6 -24 860.928 348.698   7
   1   6  24 468.417 221.003  10
   1  -6  24 421.675 179.843   5
   1  -6  24 643.109 248.683   4
   1   6  25 1991.56 406.318  10
   1  -6  25 1853.03 359.703   5
   1   6  25 2007.13 353.380   8
   1  -6  25 2526.42 424.861   4
  -1  -6 -25 2223.90 453.146   7
   1   6  26 34.7149 160.302  10
   1  -6  26 253.314 163.740   4
   1  -6  26 560.673 233.851   5
  -1  -6 -26 456.122 272.438   7
   1   6  26 189.391 173.794   8
   1  -6  27 864.253 292.024   4
   1  -6  27 784.759 286.347   5
   1   6  27 463.000 185.185   8
   1   6  27 402.746 215.320  10
   1  -6  28 372.958 201.961   5
   1  -6  28 343.391 136.436   4
   1   6  28 375.141 193.854   8
   1   6  28 415.212 236.356  10
   1  -6  29 573.037 185.991   4
   1  -6  29 589.647 239.140   5
   1   6  29 631.014 279.208  10
   1   6  29 447.147 159.958   8
   1   6  30 261.631 202.897   8
   1  -6  30-32.8092 171.545   5
   1  -6  30 295.727 186.914   4
   1   6  30 239.910 210.150  10
   1   6  31-191.380 213.621   8
   1  -6  31 140.926 202.427   5
   1   6  31 87.7797 186.061  10
   1   6  32 394.076 197.891  10
   1  -6  32 503.599 230.751   5
   1   6  32 471.822 244.277   8
   1  -6  33 295.983 232.283   5
   1   6  33 337.024 240.701  10
   1   6  33 797.329 251.837   8
   1   6  34 693.442 273.337   5
   1   6  34 559.594 223.763  10
   1  -6  34 276.950 189.087   5
   1   6  34 813.728 256.781   8
   1   6  35 694.829 237.761   8
   1   6  35 376.647 195.836   5
   1  -6  35 487.724 231.620   5
   1  -6  36 358.049 166.506   5
   1   6  36 52.3291 152.295   5
   1  -6  37-173.304 255.641   5
   1   6  37 131.362 147.948   5
   1  -6  38 452.196 252.923   5
   1   6  38 725.342 219.015   5
   1  -6  39 102.381 155.306   5
   1   6  39-215.817 149.528   5
   1   6  40 204.004 132.840   5
   1  -6  40-275.857 265.196   5
  -1  -7  39-10.1179 160.047   5
  -1   7  38 348.278 171.729   5
  -1  -7  38 209.260 194.290   5
  -1  -7  37 315.701 283.815   5
  -1   7  37 358.803 184.836   8
  -1   7  37-403.440 191.653   5
  -1   7  36 63.6615 114.658   5
  -1  -7  36 339.519 253.848   5
  -1   7  36 79.2505 156.782   8
  -1   7  35 741.685 234.385   5
  -1   7  35 711.142 261.898   8
  -1  -7  35 1027.91 321.386   5
  -1   7  34 435.471 256.360   8
  -1   7  34 405.181 216.075  10
  -1   7  34 386.953 183.697   5
  -1  -7  34 355.490 199.853   5
  -1  -7  33 196.536 216.954   5
  -1   7  33-12.5565 178.386  10
  -1   7  33-270.446 218.112   8
  -1   7  32 143.920 173.834   8
  -1  -7  32 124.310 185.496   5
  -1   7  32-165.435 175.044  10
  -1   7  31 446.753 193.422   8
  -1   7  31 143.125 220.408  10
  -1  -7  31 21.9581 168.234   5
  -1  -7  30 629.311 250.427   5
  -1   7  30 437.817 230.132   8
  -1   7  30 438.751 290.297  10
  -1   7  29 840.285 251.554   8
  -1   7  29 722.852 272.407  10
  -1  -7  29 1328.49 373.686   5
  -1   7  28 180.930 254.828  10
  -1   7  28 489.286 272.198   8
  -1  -7  28 15.5606 175.533   5
  -1  -7  27-149.653 161.562   5
  -1   7  27 124.498 154.567   8
  -1   7  26 310.414 221.925  10
  -1  -7  26 88.8643 185.594   5
  -1   7  26 305.750 185.696   8
  -1  -7  25 1028.37 307.114   5
  -1   7  25 585.303 229.745   8
  -1   7  25 680.483 264.178  10
  -1  -7  24 115.572 168.615   5
  -1   7  24 9.51202 143.341   8
  -1  -7  24 106.557 155.997   4
  -1   7  24 105.285 201.383  10
  -1  -7  23 49.6618 184.368   4
  -1   7  23 323.605 221.103  10
  -1   7  23 310.957 173.094   8
  -1  -7  23 403.588 277.143   5
  -1  -7  22 132.199 148.131   9
  -1   7  22 390.703 202.696  10
  -1  -7  22 253.544 201.542   5
  -1   7  22 189.525 140.323   8
  -1  -7  22 491.541 227.352   4
  -1   7  21 458.603 197.458   8
  -1  -7  21 528.834 240.616   4
  -1  -7  21 614.185 188.178   9
  -1   7  21 858.795 295.063  10
  -1  -7  21 644.200 280.493   5
  -1  -7  20 250.151 207.232   5
  -1  -7  20 261.447 161.407   9
  -1   7  20 232.949 161.415  10
  -1   7  20-98.7414 146.245   8
  -1  -7  20-76.9661 163.656   4
  -1   7  19 320.533 198.146  10
  -1  -7  19 176.171 117.620   9
  -1  -7  19-55.7998 154.045   5
  -1   7  19 255.587 197.777   8
  -1  -7  19 385.421 207.981   4
  -1  -7  18 366.327 212.512   4
  -1  -7  18 451.773 181.230   9
  -1   7  18 255.329 149.369   8
  -1   7  18 526.458 215.548  10
  -1  -7  18 472.448 207.585   5
  -1  -7  17 1974.69 384.425   4
  -1  -7  17 1879.55 366.946   5
  -1  -7  17 1251.13 249.676   9
  -1   7  17 1244.16 309.119  10
  -1   7  17 1597.75 309.955   8
  -1  -7  16 1853.46 346.598   4
  -1   7  16 982.143 267.586  10
  -1   7  16 1108.32 270.837   8
  -1  -7  16 1055.48 244.565   5
  -1  -7  16 1022.87 245.230   9
  -1  -7  15 1164.47 278.477   5
  -1  -7  15 1479.64 331.966   4
  -1  -7  15 1352.77 234.439   9
  -1   7  15 1285.59 253.955   8
  -1   7  15 781.894 237.130  10
  -1  -7  14-134.620 163.352   5
  -1   7  14 80.3969 150.835  10
  -1  -7  14-116.135 183.526   4
  -1  -7  14 74.1486 96.7172   9
  -1   7  14-90.0845 154.561   8
  -1   7  13 1385.45 299.492  10
  -1  -7  13 1926.51 348.232   5
  -1  -7  13 1369.53 249.279   9
  -1   7  13 1732.76 295.280   8
  -1  -7  13 1670.68 303.592   4
  -1  -7  12 26.3471 167.168  11
  -1  -7  12 220.480 177.297   4
  -1  -7  12 44.2221 109.217   9
  -1   7  12 74.5975 138.326  10
  -1   7  12 250.925 156.204   8
  -1  -7  12 302.000 186.230   5
  -1   7  11 11.0836 149.050   8
  -1  -7  11 43.0155 112.223   9
  -1  -7  11 189.684 158.220   5
  -1  -7  11 198.176 178.930   4
  -1   7  11 225.283 120.944  10
  -1  -7  11 310.238 220.844  11
  -1   7  10 484.578 184.738   8
  -1  -7  10 419.707 230.049   4
  -1  -7  10 252.989 141.531   9
  -1  -7  10 310.590 181.970   5
  -1  -7  10 259.797 180.811  11
  -1   7  10 563.877 204.732  10
   1  -7 -10 289.770 221.358  11
  -1  -7   9 57.8463 139.715  11
  -1   7   9 2.18854 137.149  10
   1  -7  -9 263.654 198.092  11
  -1  -7   9-170.920 154.528   5
  -1  -7   9-226.845 137.195   9
  -1   7   8 137.221 144.788  10
  -1  -7   8 202.379 156.262  11
   1  -7  -8-57.7989 147.715  11
  -1  -7   8-76.0792 95.4050   9
   1  -7  -7 1431.92 329.749  11
  -1  -7   7 1276.81 227.935   9
  -1  -7   7 1073.21 275.788  11
  -1   7   7 1191.46 248.065  10
  -1  -7   6-162.484 162.415  11
  -1  -7   6-90.6013 88.3836   9
  -1   7   6-68.4018 120.328  10
   1  -7  -6 93.1542 187.235  11
   1  -7  -5-61.7323 98.0801   9
  -1   7   5 280.834 176.930  10
  -1  -7   5 220.210 197.211  11
   1  -7  -5 71.4192 140.406  11
  -1  -7   5 49.0529 106.556   9
   1  -7  -4-65.5775 99.4035   9
  -1   7   4 136.203 143.817  10
  -1  -7   4 87.5216 187.162  11
   1  -7  -4 436.041 237.038  11
  -1  -7   4 256.706 127.427   9
   1  -7  -3 2222.59 389.269  11
   1  -7  -3 2540.56 299.885   9
   1  -7  -3 2490.10 233.553   6
  -1   7   3 1991.77 307.474  10
  -1  -7   3 2416.38 379.773  11
  -1  -7   3 2637.76 312.394   9
   1  -7  -2 169.403 102.605   9
   1  -7  -2 69.8866 109.296   6
  -1  -7   2 109.037 147.282   9
   1  -7  -2 238.433 189.311  11
  -1  -7   2-47.4886 177.358  11
   1  -7  -1 2082.10 222.663   6
   1  -7  -1 2203.06 262.653   9
   1  -7  -1 1892.21 353.827  11
  -1  -7   1 2041.99 291.969   9
  -1  -7   1 2098.60 367.114  11
  -1  -7   0 534.914 190.369  11
   1  -7   0 297.762 160.553  11
   1  -7   0 479.104 127.033   6
   1  -7   0 406.909 149.120   9
  -1  -7   0 410.151 145.036   9
   1  -7   1 524.164 224.254  11
  -1  -7  -1 530.638 192.156   9
  -1  -7  -1 299.523 195.120  11
   1  -7   1 519.075 128.874   6
   1  -7   1 475.263 161.549   9
  -1  -7  -2 304.706 141.699  11
  -1  -7  -2 201.689 129.398   9
  -1  -7  -2-78.1650 172.870   7
   1  -7   2 82.4459 95.9479   6
   1  -7   2 263.360 108.130   9
   1  -7   2 328.816 157.455  11
  -1  -7  -3 1807.01 273.174   9
   1  -7   3 1708.31 244.495   9
   1  -7   3 1592.24 208.617   6
  -1  -7  -3 1622.98 299.336   7
  -1  -7  -3 1889.14 344.231  11
   1  -7   3 1525.42 307.258  11
  -1  -7  -4 149.699 124.460  11
   1   7   4 233.370 158.052  10
  -1  -7  -4 262.863 126.772   9
   1  -7   4 407.264 190.255  11
   1  -7   4 609.164 248.353   4
   1  -7   4 178.023 108.380   9
   1  -7   4 67.9165 92.4036   6
  -1  -7  -4 193.111 150.217   7
   1   7   5 1979.13 340.985  10
  -1  -7  -5 2282.84 386.967  11
  -1  -7  -5 2323.01 325.383   9
   1  -7   5 2626.71 387.003   4
   1  -7   5 2043.58 254.272   9
   1  -7   5 2324.56 278.394   6
   1  -7   5 2166.38 376.366  11
  -1  -7  -5 2250.21 350.505   7
   1  -7   6 1212.30 291.730  11
  -1  -7  -6 1155.47 239.558   9
   1   7   6 1119.83 269.555  10
   1  -7   6 1243.27 294.240   4
  -1  -7  -6 1321.76 290.651   7
   1  -7   6 1178.48 211.241   6
   1  -7   6 1362.07 231.391   9
  -1  -7  -6 1191.41 285.273  11
   1   7   7 2.90887 141.340  10
  -1  -7  -7 284.682 166.973   9
  -1  -7  -7 26.1408 137.977  11
   1  -7   7-120.177 166.932   4
   1  -7   7 62.8802 141.027   6
   1  -7   7 140.506 93.4365   9
  -1  -7  -7 419.667 232.160   7
   1  -7   7 60.5127 148.560  11
   1  -7   8 168.527 168.685  11
   1  -7   8 643.889 259.614   4
   1   7   8 201.059 126.826  10
  -1  -7  -8 152.242 134.859  11
  -1  -7  -8 204.760 165.710   9
   1  -7   8 287.357 155.620   5
   1  -7   8 338.923 133.353   6
   1  -7   8 273.492 125.788   9
  -1  -7  -8 158.774 162.483   7
   1   7   9 1904.96 291.029   8
   1  -7   9 2449.10 319.040   6
  -1  -7  -9 1830.06 368.470  11
   1   7   9 1609.84 319.808  10
   1  -7   9 1743.84 367.970  11
   1  -7   9 1762.52 240.815   9
   1  -7   9 1850.65 299.126   5
   1  -7   9 2647.16 417.257   4
  -1  -7  -9 2026.66 367.713   7
   1  -7  10 1269.85 286.390   5
   1   7  10 1173.98 282.648  10
   1   7  10 1750.24 277.858   8
   1  -7  10 1885.72 390.565  11
  -1  -7 -10 1514.95 305.779  11
  -1  -7 -10 1432.47 319.627   7
   1  -7  10 1562.21 346.929   4
   1  -7  10 1331.41 249.138   6
   1  -7  10 1489.02 218.881   9
   1  -7  11-372.963 243.720  11
   1   7  11 6.93753 141.191  10
   1  -7  11-31.7648 111.023   5
  -1  -7 -11-109.879 207.855   7
   1  -7  11 110.174 101.422   9
   1  -7  11 136.059 193.332   4
   1  -7  11-71.2308 150.346   6
   1   7  11 2.55965 118.027   8
   1  -7  12 588.072 251.108  11
   1   7  12 734.628 237.200  10
   1  -7  12 625.350 241.577   4
   1  -7  12 696.696 204.785   5
  -1  -7 -12 440.443 216.628   7
   1   7  12 785.117 206.947   8
   1  -7  13 830.802 260.145   4
   1   7  13 503.788 187.535   8
   1  -7  13 364.779 215.313  11
   1   7  13 599.036 254.875  10
   1  -7  13 1102.70 276.516   5
  -1  -7 -13 983.709 283.298   7
   1  -7  14 1742.04 354.325  11
  -1  -7 -14 1923.26 378.072   7
   1  -7  14 1686.27 345.469   4
   1   7  14 2213.58 381.331  10
   1   7  14 1905.86 302.062   8
   1  -7  14 2199.65 369.082   5
   1   7  15 2563.80 341.011   8
   1  -7  15 2251.84 425.375  11
   1  -7  15 2412.30 377.152   5
  -1  -7 -15 2278.86 447.742   7
   1   7  15 1952.72 349.076  10
   1  -7  15 2467.58 396.037   4
   1  -7  16 634.462 260.898   4
   1   7  16 891.009 231.162   8
   1  -7  16 793.454 259.824   5
  -1  -7 -16 855.672 340.374   7
   1   7  16 1214.20 319.537  10
   1   7  17 325.742 204.027  10
   1   7  17-32.9080 143.861   8
  -1  -7 -17 457.298 285.224   7
   1  -7  17-32.2837 139.807   5
   1  -7  17-35.1935 199.874   4
   1  -7  18 325.432 164.451   5
   1   7  18 422.335 183.524   8
  -1  -7 -18 302.422 305.649   7
   1   7  18 133.844 161.318  10
   1  -7  18 227.256 147.016   4
   1  -7  19 1078.95 251.295   5
   1   7  19 1150.31 242.403   8
   1  -7  19 1275.64 364.834   4
  -1  -7 -19 1595.86 393.022   7
   1   7  19 1145.47 287.060  10
  -1  -7 -20-43.3448 208.324   7
   1   7  20 77.8779 161.929  10
   1  -7  20-3.58777 161.053   4
   1  -7  20-148.099 164.935   5
   1   7  20-138.260 127.653   8
   1   7  21-152.743 145.519  10
   1  -7  21 0.19520 181.039   5
   1   7  21 261.707 168.592   8
  -1  -7 -21-31.8741 223.577   7
   1  -7  21 156.236 233.021   4
   1   7  22 131.251 154.795   8
   1  -7  22 91.3345 186.994   5
   1  -7  22-15.9267 210.331   4
  -1  -7 -22 35.7529 233.309   7
   1   7  22 20.6804 159.699  10
   1   7  23 316.093 182.064   8
   1  -7  23 330.588 198.341   4
   1  -7  23 374.436 257.928   5
   1   7  23 32.0220 156.240  10
   1   7  24 489.845 260.637  10
   1  -7  24 731.699 247.471   4
   1   7  24 850.566 230.009   8
   1  -7  24 303.804 174.533   5
   1   7  25 271.781 191.103  10
   1   7  25 538.989 221.657   8
   1  -7  25 457.214 200.691   4
   1  -7  25 431.590 192.382   5
   1   7  26 136.978 137.669   8
   1   7  26-119.428 174.361  10
   1  -7  26 497.460 259.436   4
   1  -7  26 30.6733 197.508   5
   1   7  27 79.1058 151.375  10
   1   7  27 45.5130 141.845   8
   1  -7  27-367.563 219.663   5
   1  -7  27 271.555 181.071   4
   1   7  28-16.9221 155.552   8
   1  -7  28 130.330 147.986   4
   1   7  28 384.255 242.865  10
   1  -7  28-12.1634 210.599   5
   1   7  29 328.443 211.635   8
   1   7  29-14.9150 175.673  10
   1  -7  29-77.3276 170.757   5
   1   7  30-96.0274 188.581   8
   1  -7  30 182.670 232.147   5
   1   7  30 270.673 203.840  10
   1   7  31 211.279 258.464  10
   1   7  31-48.7146 176.020   8
   1  -7  31 137.273 160.863   5
   1  -7  32 249.037 227.386   5
   1   7  32 138.063 189.369  10
   1   7  32 399.044 178.272   8
   1  -7  33 376.945 254.931   5
   1   7  33 420.737 231.112  10
   1   7  34 57.8801 164.251   5
   1   7  34 86.3861 182.321  10
   1  -7  34-236.866 192.013   5
   1  -7  35-91.6594 166.976   5
   1   7  35-58.2388 157.277  10
   1   7  35 76.7938 124.569   5
   1   7  36 269.167 188.960   5
   1  -7  36 91.0646 150.002   5
   1   7  37 93.6529 137.725   5
   1  -7  37 87.5565 147.256   5
  -1  -8  36 412.232 275.419  11
  -1  -8  36-328.848 201.929   5
  -1  -8  35-136.711 219.287   5
  -1   8  35 178.725 204.419   8
  -1   8  35-266.790 144.335   5
  -1  -8  35-22.5358 171.076  11
  -1   8  35 263.124 229.847  10
  -1  -8  34 514.258 236.932   5
  -1   8  34 475.359 255.303  10
  -1   8  34 340.263 204.766   8
  -1   8  34 418.606 192.707   5
  -1   8  33-201.042 190.763   8
  -1  -8  33-173.782 239.907   5
  -1   8  33 53.3063 161.419  10
  -1   8  32-30.1079 152.622   8
  -1  -8  32-270.014 216.289   5
  -1   8  32 7.12706 169.887  10
  -1   8  31 200.945 239.311  10
  -1   8  31 580.696 284.870   8
  -1  -8  31-59.2564 273.327   5
  -1  -8  30 327.185 276.998   5
  -1   8  30 161.199 244.915  10
  -1   8  30 106.217 167.344   8
  -1  -8  29-120.993 174.835   5
  -1   8  29 209.689 209.886  10
  -1   8  29-23.3299 156.519   8
  -1   8  28 417.437 254.585   8
  -1   8  28 519.529 247.159  10
  -1  -8  28-76.0905 202.448   5
  -1  -8  27 534.310 223.617   5
  -1   8  27 62.5478 190.148  10
  -1   8  27 34.5366 154.333   8
  -1   8  26 221.419 179.872  10
  -1  -8  26 550.401 299.634   5
  -1   8  26 238.998 169.236   8
  -1   8  25 128.468 165.188   8
  -1  -8  25 0.24416 172.882   5
  -1   8  25-59.4884 169.540  10
  -1  -8  24 688.501 301.155   5
  -1   8  24 120.584 162.445   8
  -1   8  24 785.978 319.813  10
  -1  -8  23 217.570 169.321   5
  -1   8  23 63.6315 138.901   8
  -1   8  22 328.237 195.493   8
  -1   8  22-39.3160 205.498  10
  -1  -8  22 44.1144 176.188   4
  -1  -8  22-56.7368 149.722   5
  -1   8  21 435.515 213.818   8
  -1  -8  21 623.232 287.486   5
  -1   8  21 20.8607 165.149  10
  -1  -8  21 803.473 280.853   4
  -1   8  20 942.300 295.630  10
  -1   8  20 1005.60 222.290   8
  -1  -8  20 1321.26 416.322   5
  -1  -8  20 1072.98 296.481   4
  -1  -8  20 812.059 333.627  11
  -1   8  19-0.69048 142.635   8
  -1  -8  19 185.661 166.302  11
  -1  -8  19 255.744 200.445   4
  -1   8  19 165.660 212.213  10
  -1  -8  19 329.361 273.705   5
  -1  -8  18 1091.35 346.185  11
  -1  -8  18 1621.68 385.434   5
  -1   8  18 1675.43 376.378  10
  -1  -8  18 1883.83 355.861   4
  -1   8  18 1322.24 294.500   8
  -1   8  17 404.886 192.562   8
  -1  -8  17 522.990 175.773   9
  -1  -8  17 626.628 315.740  11
  -1  -8  17 726.166 259.806   4
  -1   8  17 409.449 211.642  10
  -1  -8  17 980.771 337.767   5
  -1  -8  16 80.7956 160.674   4
  -1  -8  16-88.4105 131.633   9
  -1   8  16 122.456 153.696   8
  -1   8  16-115.508 162.330  10
  -1  -8  16-136.616 180.841  11
  -1  -8  16 304.494 160.675   5
  -1  -8  15-268.071 220.805   5
  -1  -8  15 34.4337 176.223  11
  -1   8  15 275.849 221.179  10
  -1  -8  15 91.5700 133.914   9
  -1   8  15 83.9387 164.414   8
  -1  -8  14 191.543 152.267   9
  -1   8  14 185.160 141.904   8
  -1   8  14 295.594 188.336  10
  -1  -8  14-69.3729 202.115   5
  -1  -8  14 77.8942 237.022  11
  -1   8  13 289.075 198.746  10
  -1  -8  13 119.392 88.4648   9
  -1  -8  13 236.478 248.134  11
  -1   8  13 180.813 169.688   8
  -1  -8  13 293.841 186.595   5
  -1   8  12-194.893 155.359   8
  -1  -8  12-65.1594 140.675   9
  -1  -8  12-50.4446 176.692  11
  -1   8  12 382.666 194.198  10
  -1  -8  11 208.908 189.520  11
  -1   8  11 103.499 124.402   8
  -1   8  11 43.6261 159.710  10
  -1  -8  11 28.7342 105.282   9
  -1  -8  10 334.423 142.027   9
  -1   8  10 231.949 138.256   8
   1  -8 -10 326.142 213.622  11
  -1  -8  10 270.041 168.145  11
  -1   8  10 752.215 249.868  10
  -1   8   9 18.7717 127.049  10
  -1   8   9 209.124 144.621   8
  -1  -8   9-148.090 225.201  11
   1  -8  -9 210.923 201.786  11
  -1  -8   9 80.6219 140.045   9
  -1  -8   8 455.517 179.415   9
  -1  -8   8 439.972 260.707  11
  -1   8   8 317.038 178.038  10
   1  -8  -8 246.768 187.573  11
  -1   8   7 471.681 209.937  10
  -1  -8   7 670.476 304.502  11
  -1  -8   7 290.981 144.722   9
   1  -8  -7 3.12231 178.290  11
  -1  -8   6-53.0488 96.3158   9
  -1   8   6 160.617 165.591  10
   1  -8  -6 506.109 230.326  11
  -1  -8   6 130.141 166.380  11
   1  -8  -5 682.347 272.010  11
  -1  -8   5 726.881 261.570  11
  -1  -8   5 655.503 180.714   9
  -1   8   5 660.831 250.281  10
   1  -8  -4 693.735 230.330  11
  -1  -8   4 652.670 278.358  11
  -1  -8   4 703.900 191.255   9
  -1   8   4 626.697 242.674  10
  -1  -8   3 49.5787 95.6281   9
   1  -8  -3 478.599 275.213  11
  -1   8   3 184.838 159.846  10
  -1  -8   3 278.406 213.940  11
   1  -8  -3 9.87663 111.189   9
  -1   8   2 34.7761 132.729  10
  -1  -8   2 499.444 254.548  11
  -1  -8   2 507.836 176.216   9
   1  -8  -2 539.785 161.497   9
   1  -8  -2 204.663 161.671  11
  -1  -8   1 1041.01 296.360  11
  -1   8   1 1145.13 258.978  10
   1  -8  -1 1319.89 252.445   9
  -1  -8   1 1393.98 278.838   9
   1  -8  -1 1197.18 315.634  11
  -1  -8   0 1158.46 264.584   9
   1  -8   0 1222.74 231.943   9
  -1  -8   0 1064.11 312.991  11
   1  -8   0 705.925 277.753  11
  -1  -8  -1 128.646 145.187   9
  -1  -8  -1 142.274 186.985  11
   1  -8   1 60.1590 91.7184   9
   1  -8   1 156.125 174.446  11
  -1  -8  -2-69.0339 187.044  11
  -1  -8  -2 196.913 112.036   9
   1   8   2-58.0975 125.140  10
   1  -8   2 259.471 122.237   9
   1  -8   2 64.9833 171.355  11
  -1  -8  -3 205.506 132.589   9
  -1  -8  -3 158.886 223.219  11
   1  -8   3 310.727 115.101   9
   1  -8   3 355.044 225.667  11
   1   8   3 635.461 264.590  10
   1  -8   4 1136.72 374.839  11
  -1  -8  -4 1011.28 275.558   9
   1   8   4 721.529 266.964  10
  -1  -8  -4 987.894 338.096  11
   1  -8   4 665.317 188.782   9
   1  -8   5 230.454 127.840   6
   1  -8   5 39.6311 95.8408   9
  -1  -8  -5 1.52846 162.864  11
   1   8   5 156.575 218.909  10
  -1  -8  -5 399.005 191.794   9
   1  -8   5 190.580 164.904  11
  -1  -8  -6 125.530 147.035   9
   1  -8   6-87.5895 196.968  11
  -1  -8  -6 251.686 246.872  11
   1  -8   6 59.3002 107.264   6
   1   8   6-135.466 165.717  10
   1  -8   6 103.525 128.119   9
   1  -8   7 144.203 196.637  11
   1  -8   7-49.0416 114.625   6
   1  -8   7 267.101 138.012   9
   1   8   7 72.0563 172.891  10
  -1  -8  -7 207.651 214.409  11
  -1  -8  -8 2321.88 432.830  11
   1  -8   8 2480.10 472.331   4
   1   8   8 1697.89 335.908  10
   1  -8   8 2345.46 312.988   6
   1  -8   8 1783.37 402.280  11
  -1  -8  -9 1187.77 328.566  11
   1   8   9 1076.17 313.361  10
   1  -8   9 1255.33 344.065  11
   1  -8   9 2082.96 417.232   4
   1   8   9 1133.87 226.677   8
   1   8  10 116.460 122.578   8
   1   8  10 328.398 222.045  10
   1  -8  10 192.593 185.929  11
   1  -8  10 660.649 251.053   4
   1   8  11 340.177 191.910  10
   1   8  11 208.988 147.668   8
   1  -8  11 104.296 203.732   4
   1  -8  11 158.672 179.954  11
   1   8  12 3475.84 411.730   8
   1   8  12 2726.04 445.105  10
   1  -8  12 2554.23 493.169  11
   1  -8  12 3187.78 437.651   5
   1  -8  12 4196.76 570.621   4
   1   8  13 89.3547 146.306   8
   1  -8  13 30.1825 163.437   5
   1  -8  13-141.161 168.230  11
   1  -8  13 317.160 276.019   4
   1   8  13 207.191 189.831  10
   1  -8  14 9.33844 201.597   4
   1   8  14 29.4071 149.163  10
   1  -8  14-154.461 185.563  11
   1   8  14 216.806 139.526   8
   1  -8  14-49.8741 182.906   5
   1   8  15 123.893 182.492  10
   1  -8  15 297.727 284.264  11
   1  -8  15-245.759 207.799   5
   1   8  15 252.572 130.215   8
   1   8  16 106.873 183.870  10
   1  -8  16 243.288 214.333   4
   1  -8  16-26.9736 200.130  11
   1  -8  16 232.181 164.861   5
   1   8  16 163.499 158.030   8
   1  -8  17 226.324 217.197   5
   1   8  17-34.1323 131.443   8
   1  -8  17 414.636 232.749   4
   1  -8  17-174.068 233.064  11
   1   8  17 129.835 166.146  10
   1  -8  18 1098.78 332.514   4
   1   8  18 494.884 272.285  10
   1  -8  18 566.992 212.208   5
   1  -8  18 1021.84 366.714  11
   1   8  18 966.002 254.348   8
   1  -8  19 451.242 253.283   4
   1  -8  19 302.815 172.535   5
   1   8  19 615.911 237.189  10
   1  -8  19 537.416 291.643  11
   1   8  19 628.604 247.723   8
   1  -8  20 234.927 198.120   5
   1   8  20 53.9026 137.552   8
   1   8  20-86.2533 174.402  10
   1  -8  20-123.504 186.658  11
   1  -8  20-190.032 203.344   4
   1   8  21 69.5478 173.463  10
   1  -8  21 123.433 234.653   4
   1   8  21 278.528 167.873   8
   1  -8  21 424.037 209.840   5
   1  -8  21 175.167 265.530  11
   1  -8  22 224.575 215.074  11
   1  -8  22 682.979 290.059   4
   1  -8  22 502.845 232.492   5
   1   8  22 476.197 198.657   8
   1   8  22 514.449 272.989  10
   1  -8  23 580.591 220.931   5
   1  -8  23 640.910 256.908   4
   1   8  23 353.691 162.871   8
   1  -8  23 526.361 243.339  11
   1   8  23 170.311 197.325  10
   1  -8  24 57.6990 179.967   5
   1  -8  24-445.101 253.819   4
   1  -8  24 169.562 220.848  11
   1   8  24 91.9417 157.680  10
   1   8  24-238.969 194.897   8
   1  -8  25 535.625 208.845   4
   1  -8  25 675.449 242.301   5
   1   8  25 545.130 259.291  10
   1  -8  25 384.603 192.289  11
   1   8  25 851.898 230.671   8
   1   8  26 1061.59 299.604   8
   1  -8  26 318.672 174.115   4
   1  -8  26 774.798 274.709   5
   1   8  26 775.499 303.616  10
   1  -8  26 300.287 203.123  11
   1   8  27 64.3564 141.503   8
   1  -8  27-176.790 218.861  11
   1  -8  27-18.5127 199.957   5
   1   8  27-142.750 182.233  10
   1   8  28 128.206 215.703  10
   1   8  28 269.927 185.150   8
   1  -8  28 447.607 290.466  11
   1  -8  28 14.4019 177.165   5
   1  -8  29 401.118 274.907   5
   1   8  29 507.673 266.467  10
   1  -8  29 264.773 281.435  11
   1   8  29 293.816 210.308   8
   1   8  30 62.7080 192.631  10
   1  -8  30 25.0022 225.155  11
   1  -8  30-3.73171 170.749   5
   1   8  30-161.738 183.576   8
   1  -8  31 144.264 158.117   5
   1  -8  31-310.626 274.572  11
   1   8  31 209.364 222.744  10
   1   8  32 111.204 165.329  10
   1  -8  32-59.0460 184.992  11
   1  -8  32 532.454 216.591   5
   1   8  33 318.852 220.939  10
   1  -8  33-23.6375 170.341  11
   1  -8  33 43.0800 181.959   5
   1  -8  34 231.719 145.602   5
   1  -8  34 249.878 258.769  11
   1   8  34 55.2396 185.338   5
   1   8  34 166.930 195.026  10
   1   8  35-148.609 148.759   5
   1  -8  35-402.092 241.712   5
   1   8  35 230.955 145.768  10
   1  -8  35-446.543 285.421  11
  -1   9  33-269.752 210.779  10
  -1  -9  33 269.700 213.946  11
  -1  -9  33 45.8110 197.929   5
  -1   9  32 239.459 173.651  10
  -1   9  32 5.33993 140.954   8
  -1  -9  32-87.0417 253.009  11
  -1  -9  32 194.068 204.172   5
  -1   9  31 84.0135 138.375   8
  -1  -9  31-238.555 285.650  11
  -1  -9  31-193.318 191.046   5
  -1   9  31-67.4012 172.216  10
  -1   9  30 437.705 175.275   8
  -1   9  30-166.438 179.326  10
  -1  -9  30-210.899 191.423   5
  -1  -9  30-167.815 178.042  11
  -1  -9  29-159.519 223.311   5
  -1  -9  29-200.350 243.053  11
  -1   9  29 481.348 313.815  10
  -1   9  29-234.576 210.380   8
  -1   9  28 129.360 197.774  10
  -1  -9  28 409.901 256.264  11
  -1   9  28 212.953 152.305   8
  -1  -9  28 202.184 200.654   5
  -1  -9  27 401.001 316.426  11
  -1   9  27 330.808 263.260   8
  -1  -9  27 43.6137 213.561   5
  -1   9  27 229.254 196.521  10
  -1  -9  26 500.829 267.603  11
  -1  -9  26 1126.66 356.798   5
  -1   9  26 1095.02 349.340  10
  -1   9  26 771.997 256.150   8
  -1   9  25 647.702 251.365  10
  -1   9  25 610.403 238.504   8
  -1  -9  25 450.205 298.498  11
  -1  -9  25 711.389 280.683   5
  -1  -9  24-109.003 199.271  11
  -1   9  24 410.424 236.996  10
  -1   9  24 118.590 173.998   8
  -1  -9  24 459.291 235.743   5
  -1   9  23 143.740 178.049  10
  -1   9  23 355.734 211.962   8
  -1  -9  23 175.653 259.999  11
  -1  -9  23 760.665 285.369   5
  -1  -9  22 741.053 306.543   5
  -1  -9  22 794.696 347.143  11
  -1   9  22 894.109 326.862  10
  -1   9  22 1287.21 323.037   8
  -1   9  21 195.306 232.679  10
  -1  -9  21 422.461 288.036   5
  -1  -9  21 530.380 321.190  11
  -1   9  21 67.0136 156.446   8
  -1  -9  20 1101.76 381.000  11
  -1  -9  20 883.214 288.974   5
  -1   9  20 1189.89 303.551   8
  -1   9  20 1143.35 359.086  10
  -1   9  19 174.558 229.262  10
  -1  -9  19 573.662 268.869   5
  -1   9  19 352.942 189.132   8
  -1  -9  19 526.745 255.645  11
  -1  -9  18 456.033 174.267  11
  -1   9  18 466.678 209.890   8
  -1   9  18 552.405 243.607  10
  -1   9  17-22.0647 188.849  10
  -1  -9  17 43.5038 170.001  11
  -1   9  17 54.4807 173.635   8
  -1  -9  16 739.940 303.230  11
  -1   9  16 447.507 269.753  10
  -1   9  16 1253.65 323.441   8
  -1   9  15 588.528 221.327   8
  -1   9  15 615.713 264.243  10
  -1  -9  15 684.431 315.022  11
  -1   9  14 481.141 225.205   8
  -1   9  14 222.352 211.964  10
  -1  -9  14 320.918 256.775  11
  -1   9  13-27.7097 149.517  10
  -1   9  13 262.056 180.191   8
  -1  -9  13 387.221 292.072  11
  -1   9  12 2029.12 381.748  10
  -1   9  12 2084.75 393.184   8
  -1  -9  12 1962.05 440.289  11
  -1  -9  11 635.825 192.487   9
  -1   9  11 1015.93 289.851   8
  -1   9  11 760.729 221.620  10
  -1  -9  11 735.350 273.683  11
  -1   9  10 757.877 208.732   8
  -1   9  10 740.057 253.170  10
  -1  -9  10 685.778 192.725   9
  -1  -9  10 849.195 310.064  11
  -1   9   9 225.054 169.186   8
  -1  -9   9 245.061 144.998   9
   1  -9  -9 292.468 251.941  11
  -1   9   9 136.390 189.888  10
  -1  -9   9 13.0684 166.605  11
  -1   9   8-40.8369 173.696   8
   1  -9  -8-208.229 191.178  11
  -1  -9   8 280.389 166.327   9
  -1  -9   8 142.447 215.120  11
  -1   9   8 149.511 179.180  10
  -1   9   7 190.032 159.294  10
  -1  -9   7-94.1753 188.836  11
   1  -9  -7-25.1336 174.642  11
  -1  -9   7 95.8802 177.593   9
  -1  -9   6-236.655 197.164  11
   1  -9  -6-213.272 186.570  11
  -1   9   6-138.443 147.589  10
  -1  -9   6 151.025 149.327   9
  -1   9   5 10.4033 163.175  10
   1  -9  -5-24.0627 155.753  11
  -1  -9   5-28.5384 158.769  11
  -1  -9   5 154.318 118.721   9
  -1   9   4 444.458 232.344  10
  -1  -9   4 241.122 143.154   9
  -1  -9   4 302.228 208.864  11
   1  -9  -4 433.202 255.159  11
  -1  -9   3-109.753 206.501  11
   1  -9  -3-158.073 179.717  11
  -1   9   3 33.8843 152.856  10
  -1  -9   3-133.349 120.160   9
   1  -9  -2 398.440 264.926  11
  -1  -9   2 680.505 228.196   9
  -1   9   2 393.381 223.149  10
  -1  -9   2 590.010 277.620  11
  -1   9   1 395.647 246.372  10
  -1  -9   1 927.767 246.592   9
   1  -9  -1 346.318 225.692  11
  -1  -9   1 794.494 304.603  11
   1   9   0 523.206 236.165  10
   1  -9   0 347.418 137.887   9
  -1  -9   0 323.239 119.255   9
  -1  -9   0 342.514 238.648  11
   1  -9   0 320.757 230.373  11
  -1   9   0 704.832 299.947  10
  -1  -9  -1 1642.18 422.985  11
   1  -9   1 1522.07 397.513  11
   1   9   1 1311.27 332.805  10
  -1  -9  -1 1794.66 322.897   9
  -1   9  -1 1982.65 390.806  10
   1  -9   1 1460.05 251.573   9
   1  -9   2 59.3894 205.690  11
   1   9   2 460.523 250.960  10
  -1  -9  -2-17.4125 146.422   9
   1  -9   2 110.392 125.928   9
  -1  -9  -2-294.385 217.053  11
  -1   9  -2 97.1099 147.222  10
   1  -9   3 101.436 179.401  11
   1   9   3 115.569 199.269  10
  -1  -9  -3 53.6147 156.631  11
  -1  -9  -3 100.903 117.318   9
  -1  -9  -4 108.358 148.977   9
   1   9   4-237.845 174.595  10
  -1  -9  -4 168.243 262.236  11
   1  -9   4 74.7293 213.602  11
   1   9   5 328.848 230.425  10
  -1  -9  -5 515.858 296.612  11
   1  -9   5 33.9076 184.770  11
   1   9   6 1241.72 319.304  10
  -1  -9  -6 964.005 315.671  11
   1  -9   6 1176.40 381.936  11
   1  -9   7 457.066 298.828  11
  -1  -9  -7 485.443 249.360  11
   1   9   7 93.4722 211.345  10
   1   9   8 11.9737 135.327   8
   1  -9   8 101.430 182.150  11
   1   9   8 186.016 186.915  10
  -1  -9  -8-6.81920 179.716  11
   1   9   9 19.9147 168.182  10
   1   9   9 166.822 141.654   8
   1  -9   9 261.674 222.794  11
   1  -9  10 716.745 396.189  11
   1   9  10 387.973 200.506   8
   1   9  10 888.011 337.382  10
   1  -9  11 1142.50 358.850  11
   1   9  11 1474.01 296.538   8
   1   9  11 1114.72 327.703  10
   1  -9  12 169.786 229.580  11
   1   9  12-10.5944 132.818   8
   1   9  12-365.451 223.964  10
   1   9  13 200.982 221.140  10
   1  -9  13 196.716 231.201  11
   1   9  13 583.688 202.845   8
   1   9  14 578.430 304.759  10
   1  -9  14 806.236 323.068  11
   1   9  14 399.610 208.852   8
   1  -9  15 333.198 214.905  11
   1   9  15 473.798 223.444   8
   1   9  15 532.114 292.841  10
   1   9  16-37.4816 161.995  10
   1  -9  16-53.7305 200.628  11
   1  -9  16-157.024 216.745   4
   1   9  16-109.598 147.851   8
   1   9  17 136.505 154.957   8
   1  -9  17 61.7612 231.096  11
   1   9  17 153.252 161.557  10
   1  -9  17-234.777 176.757   4
   1  -9  18-175.737 201.262   4
   1   9  18 243.968 230.094  10
   1   9  18 473.550 212.974   8
   1  -9  18 350.259 303.664  11
   1  -9  19-7.16542 226.535  11
   1   9  19-4.54190 151.053   8
   1   9  19 195.708 178.717  10
   1  -9  19 195.955 239.593   5
   1  -9  19 384.060 178.883   4
   1  -9  20 975.649 338.980   4
   1   9  20 807.863 277.301  10
   1  -9  20 299.874 235.880  11
   1  -9  20 868.092 279.994   5
   1   9  20 962.834 280.064   8
   1   9  21 476.422 269.720  10
   1  -9  21 35.7220 214.101  11
   1  -9  21 111.583 186.320   5
   1   9  21-25.3135 144.129   8
   1  -9  21 210.606 241.928   4
   1  -9  22 685.328 276.245   5
   1   9  22 664.099 227.176   8
   1  -9  22 489.127 253.900   4
   1   9  22 507.883 264.213  10
   1  -9  22 256.897 246.099  11
   1  -9  23-198.777 225.742   4
   1  -9  23-135.111 201.012   5
   1   9  23 396.680 203.632   8
   1   9  23 378.542 258.885  10
   1  -9  23-17.8434 189.435  11
   1  -9  24-79.1413 197.836   5
   1   9  24 539.151 195.559   8
   1  -9  24 60.7116 220.922  11
   1  -9  24 193.698 233.640   4
   1   9  24 197.300 217.147  10
   1  -9  25-14.0884 198.670   5
   1  -9  25 176.136 181.196  11
   1   9  25 61.9560 148.933   8
   1   9  25-100.577 187.621  10
   1   9  26 123.875 223.082  10
   1   9  26 26.9868 166.446   8
   1  -9  26-51.9517 206.367  11
   1  -9  26 350.935 229.456   5
   1   9  27 421.561 272.812  10
   1  -9  27 372.996 269.441   5
   1   9  27 279.094 160.550   8
   1  -9  27 233.829 173.252  11
   1  -9  28-47.7289 164.046  11
   1   9  28 122.557 161.817  10
   1  -9  28-273.226 228.202   5
   1  -9  29 357.121 263.735   5
   1  -9  29 253.851 245.518  11
   1   9  29 42.6479 171.011  10
   1  -9  30-22.8665 210.189  11
   1  -9  30-90.1125 207.947   5
   1   9  30-222.326 184.157  10
   1  -9  31 86.0097 179.214  11
   1   9  31 322.527 235.499  10
   1  -9  31 23.3013 142.463   5
   1  -9  32-167.331 185.550  11
   1  -9  32-203.820 152.737   5
   1   9  32 150.778 202.297  10
  -1  10  29-29.7203 168.157  10
  -1 -10  29-98.8486 190.942  11
  -1 -10  28 246.010 233.420  11
  -1  10  28 269.181 160.593  10
  -1  10  27 219.618 231.089  10
  -1  10  27-115.403 139.033   8
  -1 -10  27-119.703 191.441  11
  -1 -10  26 583.347 317.507  11
  -1  10  26 164.691 227.132   8
  -1  10  26 463.623 252.300  10
  -1  10  25 113.576 176.072   8
  -1  10  25-60.5460 201.883  10
  -1 -10  25-309.953 225.899  11
  -1 -10  24-99.1208 183.060  11
  -1  10  24 115.869 226.418  10
  -1  10  24 356.520 183.946   8
  -1  10  23 56.9305 206.379  10
  -1 -10  23 226.472 261.671  11
  -1  10  23-183.617 166.772   8
  -1  10  22-609.849 230.896   8
  -1 -10  22 9.96119 199.344  11
  -1  10  22 59.7695 210.606  10
  -1  10  21-103.561 158.332   8
  -1 -10  21-76.8219 245.102  11
  -1  10  21-65.9435 295.367  10
  -1  10  20 197.562 207.431   8
  -1 -10  20-209.083 260.612  11
  -1  10  20 297.942 251.312  10
  -1 -10  19 211.303 245.767  11
  -1  10  19-107.286 139.393   8
  -1  10  19-51.0003 187.568  10
  -1  10  18 208.282 236.772  10
  -1  10  18 93.8253 150.526   8
  -1 -10  18 131.728 248.445  11
  -1 -10  17 97.5069 177.256  11
  -1  10  17 8.30526 200.859  10
  -1  10  17 436.441 200.675   8
  -1  10  16 116.164 185.260  10
  -1  10  16-152.378 189.741   8
  -1 -10  16-168.471 256.568  11
  -1 -10  15-85.5939 273.074  11
  -1  10  15 306.417 208.256   8
  -1  10  15-50.6080 187.870  10
  -1  10  14 28.5990 208.329  10
  -1  10  14-99.5193 149.542   8
  -1 -10  14 20.5207 180.159  11
  -1  10  13 372.168 235.355   8
  -1  10  13-114.721 202.125  10
  -1 -10  13-16.9621 193.444  11
  -1  10  12 130.783 165.779   8
  -1  10  12 7.40033 160.889  10
  -1 -10  12 244.220 309.839  11
  -1  10  11 51.4321 225.876  10
  -1  10  11-27.1666 162.343   8
  -1 -10  11 8.54966 181.950  11
  -1  10  10 3.32553 211.120  10
  -1  10  10-68.8885 162.581   8
  -1 -10  10-67.9451 231.226  11
  -1  10   9 401.599 233.202   8
  -1 -10   9 77.4849 220.236  11
  -1  10   9 171.893 222.766  10
  -1 -10   8 0.92810 193.354  11
  -1  10   8-354.605 228.960  10
  -1  10   8-1.62150 147.007   8
  -1 -10   7-206.286 273.761  11
   1 -10  -7 378.379 249.232  11
  -1  10   7-130.003 155.925  10
  -1  10   7-25.1661 180.443   8
  -1  10   6 41.4088 166.710  10
  -1 -10   6 418.898 290.891  11
   1 -10  -6 428.316 243.782  11
  -1 -10   6 320.226 152.012   9
  -1  10   6 9.34795 162.474   8
  -1 -10   5 889.482 262.320   9
   1 -10  -5 389.386 283.153  11
  -1  10   5 575.814 274.076  10
  -1 -10   5 595.502 314.641  11
   1 -10  -4 270.081 323.908  11
  -1 -10   4 415.954 266.133  11
  -1  10   4-31.4469 177.537  10
  -1 -10   4 413.726 208.945   9
   1 -10  -3 131.529 272.763  11
  -1 -10   3 11.8311 130.498   9
   1  10  -3-126.046 179.028  10
  -1  10   3-182.436 231.430  10
  -1 -10   3 140.619 213.733  11
   1 -10  -2 50.4958 221.230  11
  -1  10   2-288.839 260.366  10
   1  10  -2-240.939 210.332  10
  -1 -10   2 28.4226 136.110   9
  -1 -10   2 0.29495 178.116  11
  -1 -10   1 267.379 211.492   9
  -1  10   1 318.137 236.105  10
  -1 -10   1 386.157 254.775  11
   1 -10  -1 333.040 298.981  11
   1  10  -1 99.7248 171.389  10
  -1 -10   0 10.2554 175.688  11
   1  10   0 5.26102 181.551  10
  -1  10   0 354.535 259.708  10
   1 -10   0 499.768 305.337  11
  -1 -10   0 185.855 183.126   9
  -1  10  -1-146.533 168.851  10
   1  10   1 157.933 196.970  10
   1 -10   1-322.620 304.910  11
  -1 -10  -1 27.4985 202.756  11
   1 -10   2 78.3733 215.056  11
  -1  10  -2 195.895 184.203  10
  -1 -10  -2 255.820 267.974  11
   1  10   2 482.000 277.317  10
  -1 -10  -3-78.9399 179.083  11
   1  10   3 133.876 210.139  10
  -1  10  -3 96.7708 199.713  10
   1 -10   3 158.233 251.320  11
   1 -10   4 176.668 269.670  11
  -1  10  -4 274.949 241.267  10
   1  10   4 241.223 203.282  10
  -1 -10  -4-233.451 223.531  11
   1  10   5 112.694 199.621  10
  -1  10  -5 509.023 266.362  10
   1 -10   5-145.396 211.923  11
  -1 -10  -5 355.634 263.754  11
  -1  10  -6 180.336 152.586  10
   1  10   6 58.1993 187.742  10
   1  10   6 5.66795 169.915   8
   1 -10   6-21.7263 256.209  11
  -1 -10  -6 310.589 219.246  11
  -1 -10  -7 409.414 270.263  11
   1  10   7-240.825 171.077  10
   1  10   7-64.6865 146.018   8
   1 -10   7 50.3547 302.872  11
   1  10   8 749.905 255.448   8
   1 -10   8 904.700 395.708  11
   1  10   8 715.538 362.387  10
   1 -10   9-97.7488 286.030  11
   1  10   9 158.867 148.269   8
   1  10   9 235.713 270.452  10
   1 -10  10 566.099 367.443  11
   1  10  10 440.656 197.598   8
   1  10  10 171.184 235.414  10
   1  10  11 144.345 158.632   8
   1  10  11 27.3884 198.744  10
   1 -10  12 102.734 221.767  11
   1  10  12 26.6794 179.625  10
   1  10  12-239.582 160.851   8
   1  10  13 368.810 231.109   8
   1 -10  13 323.560 262.678  11
   1  10  13 273.794 253.077  10
   1  10  14 41.3281 134.024   8
   1  10  14-218.040 196.646  10
   1 -10  14 215.726 247.624  11
   1  10  15-134.079 166.584  10
   1  10  15 43.7179 158.006   8
   1  10  16 97.8428 224.417  10
   1 -10  16 339.687 270.858  11
   1  10  16 36.0123 154.042   8
   1  10  17 332.459 206.413  10
   1  10  17 212.909 211.115   8
   1 -10  17 279.273 302.633  11
   1  10  18 209.635 152.155   8
   1  10  18 665.998 262.569  10
   1 -10  18 463.197 300.222  11
   1 -10  19-103.176 219.474  11
   1  10  19 278.743 150.949   8
   1  10  19-70.0476 162.088  10
   1 -10  20 205.401 306.072  11
   1  10  20-166.643 153.324   8
   1  10  20 245.113 248.705  10
   1  10  21 297.711 218.009  10
   1  10  21-89.2712 137.420   8
   1 -10  21-17.9159 241.928  11
   1 -10  22 78.4836 221.260  11
   1  10  22 313.797 189.757   8
   1  10  22 69.3337 221.829  10
   1 -10  23-60.2920 225.978  11
   1  10  23 168.225 265.469  10
   1  10  23-29.9042 119.470   8
   1 -10  24-62.7632 212.402  11
   1  10  24 85.5882 177.007  10
   1 -10  25 79.7620 194.575  11
   1  10  25-214.375 183.150  10
   1  10  26 470.422 238.777  10
   1 -10  26 203.190 178.262  11
   1  10  27-27.2391 178.224  10
   1 -10  27 329.973 269.149  11
   1  10  28-432.993 251.979  10
   1 -10  28 104.513 216.099  11
  -1 -11  24 60.8095 175.773  11
  -1  11  24 280.860 167.381  10
  -1  11  23 105.750 156.975   8
  -1  11  23-141.880 174.557  10
  -1 -11  23 113.147 219.801  11
  -1 -11  22 80.7795 161.114  11
  -1  11  22 97.6571 174.628  10
  -1  11  22 61.1367 130.340   8
  -1 -11  21 277.571 187.695  11
  -1  11  21 551.584 231.800   8
  -1  11  21 470.156 244.813  10
  -1  11  20-131.406 159.688   8
  -1  11  20 45.1837 181.268  10
  -1 -11  20 188.759 180.514  11
  -1  11  19 611.970 292.004  10
  -1 -11  19 606.331 323.500  11
  -1  11  19 649.932 249.829   8
  -1  11  18 370.340 223.691  10
  -1 -11  18 187.380 236.215  11
  -1  11  18-8.56052 136.592   8
  -1  11  17 322.220 213.201  10
  -1  11  17 211.683 177.051   8
  -1 -11  17 401.520 306.425  11
  -1  11  16 659.476 234.182   8
  -1 -11  16 456.035 246.055  11
  -1  11  16 456.817 281.258  10
  -1 -11  15 293.341 272.170  11
  -1  11  15 365.821 155.751   8
  -1  11  15 539.905 300.847  10
  -1  11  14 1045.19 341.323  10
  -1 -11  14 619.560 348.653  11
  -1  11  14 775.422 306.966   8
  -1 -11  13-289.923 303.636  11
  -1  11  13 585.406 307.367  10
  -1  11  13 267.831 195.178   8
  -1  11  12-48.2874 167.057  10
  -1 -11  12 206.649 248.564  11
  -1  11  12 28.5308 179.533   8
  -1  11  11 117.604 235.056  10
  -1  11  11 168.103 198.794   8
  -1 -11  11-57.6393 214.124  11
  -1  11  10 111.407 204.925   8
  -1  11  10 124.644 189.661  10
  -1 -11  10 19.9744 215.841  11
  -1  11   9 569.125 196.482   8
  -1 -11   9 724.659 335.400  11
   1  11  -9 479.539 200.228  10
  -1  11   9 400.099 215.843  10
   1  11  -8-401.461 272.682  10
  -1  11   8 163.615 192.124   8
  -1  11   8-74.6968 193.340  10
  -1 -11   8-178.038 209.425  11
  -1 -11   7 552.771 336.739  11
  -1  11   7 528.812 215.524   8
  -1  11   7 1016.71 337.582  10
   1  11  -7-66.7654 199.828  10
   1  11  -6-155.112 187.779  10
  -1  11   6 449.345 257.753   8
  -1  11   6-147.230 184.648  10
  -1 -11   6 163.345 276.401  11
   1 -11  -5 70.1740 188.098  11
  -1  11   5-15.1635 161.601  10
   1  11  -5 214.736 177.170  10
  -1 -11   5 90.8748 227.263  11
  -1  11   5 136.450 152.077   8
   1 -11  -4 328.078 246.255  11
  -1  11   4-305.918 195.040   8
  -1  11   4-212.730 170.699  10
  -1 -11   4-143.093 255.087  11
   1  11  -4-207.555 204.639  10
   1  11  -3 467.855 242.854  10
  -1  11   3 162.961 228.756  10
  -1 -11   3 211.072 183.632  11
   1 -11  -3 630.982 359.003  11
  -1 -11   2 98.7759 197.155  11
   1  11  -2 177.666 185.357  10
  -1  11   2 319.571 318.799  10
   1 -11  -2 312.619 311.717  11
   1 -11  -1 221.651 221.512  11
  -1  11   1 84.4499 253.423  10
  -1 -11   1-367.791 243.585  11
   1  11  -1-340.939 228.222  10
  -1 -11   0 22.8315 209.704  11
   1 -11   0-159.774 238.538  11
   1  11   0 277.840 214.822  10
  -1  11   0 58.4233 199.179  10
   1  11   1-319.114 231.862  10
  -1 -11  -1-88.9785 221.459  11
  -1  11  -1-22.4608 169.184  10
   1 -11   1 105.808 185.487  11
  -1 -11  -2 422.415 299.151  11
   1  11   2 142.074 196.082  10
  -1  11  -2 51.4234 180.203  10
   1 -11   2 175.184 202.084  11
   1  11   3 279.565 169.972  10
  -1 -11  -3 620.227 348.779  11
   1 -11   3-33.5281 220.616  11
  -1  11  -3 196.004 212.225  10
  -1 -11  -4 887.638 318.169  11
   1  11   4-68.0328 220.851  10
   1  11   4 383.212 242.942   8
   1 -11   4 830.229 341.193  11
  -1  11  -4 863.730 364.575  10
   1 -11   5-83.8502 270.022  11
   1  11   5-411.917 231.976   8
  -1  11  -5 568.141 360.018  10
  -1 -11  -5-248.298 295.402  11
   1  11   5-343.059 312.690  10
   1 -11   6-169.758 254.100  11
   1  11   6-448.113 280.468  10
  -1  11  -6-1.02558 163.366  10
   1  11   6-262.619 171.223   8
   1 -11   7 403.966 301.790  11
   1  11   7 357.135 242.284  10
   1  11   7 385.650 249.496   8
  -1  11  -7 21.9996 216.529  10
   1  11   8 263.330 203.339   8
   1 -11   8 416.224 246.920  11
   1  11   8 115.764 168.931  10
  -1  11  -8 512.943 287.172  10
  -1  11  -9 347.372 164.893  10
   1 -11   9 432.298 292.499  11
   1  11   9 467.674 200.224  10
   1  11   9 411.758 158.001   8
  -1  11 -10 574.659 314.182  10
   1  11  10-44.9631 197.582  10
   1 -11  10-80.2216 215.241  11
   1  11  10-210.756 200.509   8
   1 -11  11 330.172 304.899  11
  -1  11 -11-303.175 205.267  10
   1  11  11-148.201 174.137   8
   1  11  11 563.834 340.836  10
   1 -11  12-72.3192 197.812  11
   1  11  12-421.423 225.639  10
   1  11  12-160.369 153.975   8
   1  11  13 806.285 285.993  10
   1  11  13 1149.54 307.265   8
   1 -11  13 908.617 380.899  11
   1 -11  14 92.4288 210.969  11
   1  11  14 141.622 204.835  10
   1  11  14 9.90358 137.692   8
   1  11  15 347.826 258.285  10
   1 -11  15 375.172 306.732  11
   1  11  15 277.965 217.862   8
   1  11  16-63.3795 124.816   8
   1  11  16 7.61643 179.520  10
   1 -11  16 373.817 257.741  11
   1  11  17 82.3366 150.003   8
   1  11  17 158.211 210.842  10
   1 -11  17-154.086 212.161  11
   1  11  18 660.107 309.046  10
   1  11  18-69.0563 130.780   8
   1 -11  18 424.189 293.340  11
   1 -11  19 265.435 194.851  11
   1  11  19 79.7652 153.602  10
   1  11  19 51.4673 141.185   8
   1 -11  20-287.988 171.863  11
   1  11  20 136.158 155.780  10
   1 -11  21-164.680 240.747  11
   1  11  21 26.2760 202.874  10
   1 -11  22 2.21709 203.033  11
   1  11  22-23.7680 169.816  10
   1  11  23 250.772 195.090  10
   1 -11  23 27.1388 174.189  11
  -1  12  16 21.3541 165.484  10
  -1 -12  16 222.643 270.548  11
  -1 -12  15 608.460 288.830  11
  -1  12  15 134.350 149.785   8
  -1  12  15 432.044 231.566  10
  -1  12  14 105.480 203.113  10
  -1 -12  14 55.6920 213.685  11
  -1  12  14-176.008 145.222   8
  -1  12  13 217.042 180.422   8
  -1  12  13 0.73612 157.520  10
   1  12 -13 178.417 183.175  10
  -1 -12  13 126.494 240.200  11
  -1  12  12 202.575 203.198   8
   1  12 -12-311.349 234.699  10
  -1  12  12-320.142 238.997  10
  -1 -12  12-57.6902 200.385  11
  -1 -12  11 40.2629 210.544  11
   1  12 -11 106.912 148.539  10
  -1  12  11 71.8448 178.069  10
  -1  12  11 251.391 161.443   8
  -1  12  10-268.579 187.115   8
  -1 -12  10 215.943 197.632  11
  -1  12  10 48.3740 171.416  10
   1  12 -10 439.486 234.105  10
  -1 -12   9 109.686 258.753  11
   1  12  -9 222.005 276.463  10
  -1  12   9-231.979 206.762   8
  -1  12   9 28.2361 146.761  10
   1  12  -8 204.929 182.594  10
  -1  12   8-152.880 145.614   8
  -1 -12   8 185.985 235.344  11
  -1  12   8 18.0927 175.020  10
  -1 -12   7-34.9692 236.435  11
  -1  12   7 584.727 252.272  10
  -1  12   7 228.702 221.872   8
   1  12  -7 347.882 206.115  10
   1  12  -6 84.9999 153.790  10
  -1  12   6 321.716 215.400   8
  -1 -12   6 316.148 279.856  11
  -1  12   6 87.6959 209.824  10
  -1 -12   5 392.724 276.670  11
   1  12  -5 500.538 277.495  10
  -1  12   5 853.844 269.859  10
  -1  12   5 777.890 257.264   8
  -1  12   4-96.0866 174.967  10
  -1 -12   4-273.144 252.207  11
   1  12  -4-194.527 191.717  10
  -1  12   4 199.152 209.283   8
  -1  12   3 133.956 161.031  10
   1  12  -3 165.496 167.292  10
  -1  12   3 81.3477 148.683   8
  -1 -12   3-131.449 190.017  11
   1 -12  -2-21.3267 188.153  11
  -1 -12   2 271.295 259.616  11
  -1  12   2-190.742 196.683   8
   1  12  -2-7.13046 208.145  10
  -1  12   2-283.081 169.225  10
   1 -12  -1 177.784 249.720  11
   1  12  -1 177.239 176.611  10
  -1  12   1 249.918 209.980  10
  -1  12   1 473.003 213.236   8
  -1 -12   1 379.212 292.957  11
  -1  12   0 174.479 226.824  10
   1 -12   0 14.4728 185.897  11
  -1 -12   0-170.792 187.967  11
   1  12   0 365.750 235.578  10
   1  12   0-74.7205 151.136   8
  -1 -12  -1-97.6193 221.111  11
   1  12   1 93.9991 139.374   8
   1 -12   1 133.722 207.245  11
  -1  12  -1 131.464 169.481  10
   1  12   1 140.776 191.829  10
   1 -12   2 100.122 192.057  11
   1  12   2 39.3903 146.930   8
  -1  12  -2 75.6759 155.870  10
  -1 -12  -2-55.3485 190.958  11
   1  12   2 141.719 213.704  10
   1 -12   3 55.2418 208.468  11
  -1  12  -3-68.2345 150.743  10
   1  12   3-50.8036 166.675  10
   1  12   3-27.0591 146.278   8
   1  12   4 35.2248 163.648   8
   1 -12   4 156.758 202.030  11
  -1  12  -4 36.7519 214.899  10
   1  12   4-47.2821 176.338  10
   1  12   5-84.7481 235.175  10
   1  12   5 54.2645 136.448   8
   1 -12   5 127.409 202.764  11
  -1  12  -5 47.9963 154.439  10
   1  12   6 356.377 152.286   8
   1 -12   6 130.446 337.173  11
   1  12   6 351.766 235.586  10
   1  12   7 366.490 267.256  10
   1  12   7 33.6877 133.476   8
   1 -12   7 655.580 332.863  11
   1  12   8 117.680 158.021  10
   1  12   8-184.117 158.936   8
   1  12   9 33.5394 155.966   8
   1 -12   9 38.5025 209.777  11
   1  12   9-124.901 206.904  10
   1  12  10-272.559 175.817   8
   1  12  10 342.141 241.734  10
   1 -12  10 59.6425 189.754  11
   1  12  11-126.442 163.601   8
   1 -12  11 276.295 233.744  11
   1  12  11 40.5019 197.375  10
   1  12  12 108.334 161.514  10
   1 -12  12 358.703 308.687  11
   1  12  12-1.14550 130.063   8
   1 -12  13 494.258 320.361  11
   1  12  13 38.8909 146.609   8
   1  12  13 48.0777 169.461  10
   1  12  14 67.2048 191.588  10
   1 -12  14-251.688 208.776  11
   1  12  15 3.43418 176.741  10
   1 -12  15 4.87236 169.088  11
   1 -12  16-78.6056 242.043  11
  -2   0  46-77.4689 152.665   5
  -2   0  45 173.045 160.726   5
  -2   0  45-197.574 209.858   8
  -2   0  44 550.678 284.501   5
  -2   0  44-361.025 245.479   8
  -2   0  43-441.222 275.261   8
  -2   0  43 171.405 197.124   5
  -2   0  42 1111.45 334.486   8
  -2   0  42 1184.92 328.958   5
  -2   0  41-77.6154 240.344   8
  -2   0  41 261.447 201.349   5
  -2   0  40 37.4196 147.294   5
  -2   0  40-83.7824 215.288   8
  -2   0  39 37.8283 196.361   5
  -2   0  39 511.491 271.860   8
  -2   0  38 786.124 356.316   8
  -2   0  38 1023.60 304.786   5
  -2   0  37-342.175 243.691   8
  -2   0  37 182.739 173.261   5
  -2   0  36 335.849 261.588   8
  -2   0  36 112.263 195.192   5
  -2   0  35 42.6034 138.786   5
  -2   0  35-0.24160 191.520   8
  -2   0  34 241.854 180.171   8
  -2   0  34 51.4234 131.443   5
  -2   0  33 102.514 155.747   5
  -2   0  33-407.178 238.139   8
  -2   0  32 9001.81 683.633   5
  -2   0  32 7606.88 746.282   8
  -2   0  31 94.5038 113.284   5
  -2   0  31-104.992 173.054   8
  -2   0  30 260.193 176.055   8
  -2   0  30 233.297 158.141   5
  -2   0  29-77.0981 164.990   8
  -2   0  29-160.018 104.940   5
  -2   0  28 3085.38 443.335   8
  -2   0  28 2818.71 355.570   5
  -2   0  27 73.1302 131.102   8
  -2   0  27 64.1772 125.231   5
  -2   0  26 53.9335 108.218   5
  -2   0  26 48.3230 131.315   8
  -2   0  25-70.0045 95.6031   5
  -2   0  25 0.28013 171.060   8
  -2   0  24 2707.05 322.750   5
  -2   0  24 1432.33 355.462   3
   2   0 -24 1498.43 385.614   1
  -2   0  24 2730.91 385.164   8
  -2   0  23 132.882 111.048   5
  -2   0  23 24.1098 108.232   3
   2   0 -23-11.8970 154.128   1
  -2   0  23 335.842 184.347   8
  -2   0  22 454.952 230.363   3
   2   0 -22 186.904 167.639   1
  -2   0  22 60.8889 144.333   8
  -2   0  22 299.586 137.790   5
  -2   0  21 294.600 150.718   3
  -2   0  21 84.0630 100.021   5
  -2   0  21 302.545 189.302   8
   2   0 -21 108.905 167.566   1
   2   0 -20 26367.6 1406.53   1
  -2   0  20 25841.2 783.594   5
  -2   0  20 28766.6 968.121   8
  -2   0  20 25618.8 1350.59   3
  -2   0  19 136.503 122.937   3
   2   0 -19 146.693 146.675   1
  -2   0  19 65.4512 95.0020   5
  -2   0  19-92.4482 107.154   8
  -2   0  18 1897.75 224.406   8
  -2   0  18 2110.73 218.781   5
   2   0 -18 2516.21 440.716   1
  -2   0  18 2064.76 363.965   3
  -2   0  17-17.3342 66.3653   5
  -2   0  17-51.6865 115.152   3
  -2   0  17-371.087 172.866   8
   2   0 -17-53.8247 146.251   1
  -2   0  16 52759.3 948.962   5
   2   0 -16 53176.6 1819.65   1
  -2   0  16 52315.8 1708.62   3
  -2   0  16 53679.0 1115.11   8
  -2   0  15-76.0082 113.032   8
   2   0 -15-211.143 224.649   1
  -2   0  15 17.8949 61.1554   5
  -2   0  15 77.3530 148.219   3
  -2   0  14 1043.22 243.105   3
  -2   0  14 1095.52 142.835   5
   2   0 -14 1059.61 286.068   1
  -2   0  13 277.441 208.475   3
  -2   0  13 108.941 80.2014   5
   2   0 -13 67.4472 172.959   1
  -2   0  12 301818. 1805.41   5
   2   0 -12 274376. 3660.92   1
  -2   0  11 60.4794 75.8510   5
   2   0 -11-85.1548 152.089   1
  -2   0  10 4439.19 202.690   5
   2   0 -10 4797.08 481.436   1
   2   0  -9-36.5264 150.770   1
   2   0  -8 23634.6 963.358   1
   2   0  -7-48.1022 145.929   1
   2   0  -6 322.387 131.754   1
   2   0  -5-145.988 109.534   1
   2   0  -4 108.385 70.1126   1
   2   0  -3-106.852 94.5141   1
   2   0  -2 1544.81 136.753   3
   2   0  -2 1875.86 170.625   1
   2   0  -1-1.88936 31.0053   3
   2   0  -1-51.0631 48.3103   1
   2   0   0 946.816 88.8822   3
   2   0   0 1107.40 99.9037   1
  -2   0   0 909.668 91.7416   3
   2   0   1-166.432 99.7163   2
   2   0   2 4526.36 302.519   2
   2   0   3-89.0536 121.111   2
   2   0   4 82160.8 1476.06   2
   2   0   5 40.1119 105.073   2
  -2   0  -5-157.170 68.0735   1
  -2   0  -5-139.181 128.190   2
  -2   0  -6 4705.44 426.127   2
  -2   0  -6 4297.28 226.834   1
  -2   0  -7 273.050 180.372   2
  -2   0  -7-241.265 110.633   1
  -2   0  -8 3732.42 265.967   1
  -2   0  -8 3387.95 371.898   2
  -2   0  -9 73.7673 105.699   1
  -2   0  -9 271.933 200.662   2
   2   0  10 15816.6 413.617   8
  -2   0 -10 16692.7 635.816   1
  -2   0 -10 16034.3 837.377   2
   2   0  11 67.6184 67.6083  10
  -2   0 -11 192.508 125.452   1
   2   0  11-30.5147 60.9821   8
  -2   0 -11 223.150 187.452   2
  -2   0 -12 2386.64 365.552   2
   2   0  12 2041.33 176.868   8
   2   0  12 1823.50 156.340  10
  -2   0 -12 1991.44 156.881   7
  -2   0 -13 16.5923 110.851   2
   2   0  13 14.8877 80.2397   8
  -2   0 -13 35.3844 89.9673   1
   2   0  13-54.7311 78.3482   3
   2   0  13-19.4588 86.0183  10
  -2   0 -13-152.217 77.4086   7
   2   0  14 1445.49 174.195   5
   2   0  14 1657.39 174.910  10
   2   0  14 1748.59 188.822   8
  -2   0 -14 1619.14 156.577   7
  -2   0 -14 1214.93 308.542   2
   2   0  14 1410.10 220.150   3
  -2   0 -14 1320.67 226.220   1
  -2   0 -15-1.78655 66.9907   7
   2   0  15 5.33771 92.2404   8
   2   0  15 89.5579 83.1872   5
  -2   0 -15-203.638 202.467   2
  -2   0 -15-128.440 104.755   1
   2   0  15-88.5691 99.2862   3
  -2   0 -16 768.743 254.936   2
   2   0  16 557.016 170.184   3
  -2   0 -16 384.169 87.7157   7
   2   0  16 364.364 121.724   8
   2   0  16 596.197 138.405   5
  -2   0 -16 672.947 197.173   1
   2   0  17-71.2564 84.2127   8
   2   0  17 53.7330 87.9818   5
   2   0  17-33.4464 86.5402   3
  -2   0 -17-110.674 154.913   2
  -2   0 -17-42.0872 77.1979   7
  -2   0 -17-70.8639 104.376   1
   2   0  18 2212.15 250.487   8
  -2   0 -18 1847.14 182.449   7
   2   0  18 1904.20 222.145   5
   2   0  18 1610.72 285.892   3
  -2   0 -18 1685.92 341.498   2
  -2   0 -18 1790.20 307.202   1
  -2   0 -19 50.7872 74.0857   7
  -2   0 -19 104.930 144.338   1
   2   0  19 138.563 131.587   8
   2   0  19 41.6338 85.6860   3
   2   0  19 142.657 98.8972   5
  -2   0 -19 71.7771 117.728   2
   2   0  20 3668.79 322.832   5
  -2   0 -20 3162.72 228.938   7
   2   0  20 3509.52 422.804   3
  -2   0 -20 3920.44 452.979   1
  -2   0 -20 3716.58 501.357   2
   2   0  20 3295.81 308.867   8
   2   0  21-104.731 126.703   8
   2   0  21 119.840 111.234   5
  -2   0 -21 168.846 135.762   1
   2   0  21 53.8893 129.293   3
  -2   0 -21-14.6065 162.977   2
   2   0  22 203.187 125.995   5
  -2   0 -22-196.500 183.458   1
   2   0  22 16.6398 103.202   3
   2   0  22 99.1637 107.509   8
  -2   0 -22 336.136 216.045   2
   2   0  23 89.6366 115.046   5
   2   0  23-147.411 185.192   8
   2   0  23 51.2933 132.922   3
  -2   0 -23 122.820 113.604   2
   2   0  24 618.658 191.278   5
   2   0  24 581.577 176.030   8
   2   0  25-16.5583 111.251   5
   2   0  25-39.9334 114.822   8
   2   0  26-32.5604 106.035   5
   2   0  26-1.56006 143.563   8
   2   0  27 71.6843 108.541   5
   2   0  27 122.256 117.122   8
   2   0  28 276.125 141.747   8
   2   0  28 183.603 139.490   5
   2   0  29-37.7377 136.286   8
   2   0  29 23.2552 139.832   5
   2   0  30 1436.00 292.285   5
   2   0  30 1141.92 267.164   8
   2   0  31 211.064 164.129   5
   2   0  31-93.1517 165.420   4
   2   0  31-138.404 207.051   8
   2   0  32 603.016 235.929   4
   2   0  32 609.514 236.021   8
   2   0  32 391.850 235.094   5
   2   0  33-49.8637 173.449   4
   2   0  33 239.607 207.554   8
   2   0  33 52.2568 146.455   5
   2   0  34 353.728 197.292   8
   2   0  34 534.244 258.907   5
   2   0  34 870.416 299.757   4
   2   0  35-222.932 164.139   4
   2   0  35-0.20505 144.390   5
   2   0  35 78.1968 196.995   8
   2   0  36 302.891 222.637   8
   2   0  36-225.761 158.373   5
   2   0  36 368.797 204.940   4
   2   0  37-28.4281 180.859   5
   2   0  37 295.715 160.537   8
   2   0  37-14.2070 166.766   4
   2   0  38 11.5966 179.572   8
   2   0  38 412.552 200.180   5
   2   0  38 533.189 241.352   4
   2   0  39 361.739 232.784   5
   2   0  40 222.209 222.526   5
   2   0  41-243.308 213.076   5
   2   0  42 750.528 308.594   5
   2   0  43-266.994 203.169   5
   2   0  44 788.911 256.336   5
  -2   1  46 123.041 169.617   8
  -2  -1  46 268.905 182.177   5
  -2   1  46 99.3457 223.559   5
  -2   1  45-370.725 228.690   8
  -2  -1  45 206.071 199.409   5
  -2   1  45 60.1823 168.308   5
  -2  -1  44 150.196 162.330   5
  -2   1  44-11.3926 178.954   5
  -2   1  43-21.4126 269.822   8
  -2   1  43-82.9373 244.738   5
  -2  -1  43 503.097 275.234   5
  -2  -1  42 297.154 312.123   8
  -2   1  42-119.750 227.674   8
  -2   1  42-169.753 172.619   5
  -2  -1  42 101.078 182.790   5
  -2   1  41 38.4701 149.830   5
  -2  -1  41-238.190 216.867   5
  -2  -1  41-121.174 176.126   8
  -2   1  41-149.585 291.752   8
  -2   1  40 324.673 259.986   8
  -2  -1  40 780.897 368.395   8
  -2   1  40 195.421 157.937   5
  -2  -1  40 234.219 198.813   5
  -2  -1  39-437.845 307.043   8
  -2   1  39 102.958 208.745   8
  -2   1  39-92.5076 157.846   5
  -2  -1  39 25.9819 167.573   5
  -2   1  38 57.9181 140.306   5
  -2  -1  38 188.553 162.324   5
  -2  -1  38-91.3893 222.929   8
  -2   1  38-94.5560 186.114   8
  -2  -1  37 364.076 201.811   5
  -2   1  37 135.671 152.119   5
  -2  -1  37-355.169 225.109   8
  -2   1  37 275.513 264.717   8
  -2  -1  36 197.324 143.593   5
  -2   1  36 241.054 135.392   5
  -2   1  36 613.844 299.481   8
  -2  -1  36 335.537 231.579   8
  -2   1  35 505.677 264.070   8
  -2   1  35 638.034 214.955   5
  -2  -1  35 474.818 218.970   5
  -2  -1  35 367.430 266.587   8
  -2   1  34-441.733 263.024   8
  -2   1  34-117.986 129.943   5
  -2  -1  34 410.174 253.746   8
  -2  -1  34 66.6969 193.337   5
  -2  -1  33 346.450 283.495   8
  -2   1  33 106.333 113.425   5
  -2   1  33 32.8361 213.103   8
  -2  -1  33 359.247 195.151   5
  -2  -1  32 906.111 311.784   8
  -2   1  32 1418.14 289.001   5
  -2  -1  32 1106.45 298.813   5
  -2   1  32 1387.06 360.471   8
  -2   1  31 635.760 235.269   5
  -2   1  31 623.129 257.283   8
  -2  -1  31 346.750 267.188   8
  -2  -1  31 681.360 244.845   5
  -2   1  30 239.500 137.649   5
  -2   1  30-29.9369 160.284   8
  -2  -1  30 238.534 237.511   8
  -2  -1  30-98.2128 134.143   5
  -2   1  29 1021.22 223.743   5
  -2  -1  29 929.703 299.654   8
  -2   1  29 920.133 279.933   8
  -2  -1  29 1090.97 266.159   5
  -2   1  28 207.312 108.035   5
  -2  -1  28 123.417 77.4090   4
  -2  -1  28 207.116 207.203   8
  -2  -1  28 178.652 117.366   5
  -2   1  28 60.5650 156.363   8
  -2  -1  27 577.710 212.011   8
  -2  -1  27 682.971 240.158   5
  -2   1  27 641.481 267.688   8
  -2   1  27 743.929 209.905   5
  -2  -1  27 733.828 187.294   4
  -2  -1  26 248.200 184.393   8
  -2  -1  26 395.532 155.768   5
  -2   1  26 295.511 127.022   5
  -2  -1  26 220.183 110.495   4
  -2   1  26 425.807 186.420   8
  -2   1  25 823.029 175.898   5
  -2  -1  25 1067.74 249.908   8
  -2   1  25 964.506 240.514   8
  -2  -1  25 980.126 223.473   5
  -2  -1  25 903.164 153.390   4
   2  -1 -24 9778.51 912.833   1
  -2  -1  24 10298.9 501.883   4
  -2   1  24 10900.9 694.895   8
  -2   1  24 10255.4 547.967   5
   2   1 -24 11227.4 944.996   1
  -2  -1  24 10186.6 911.699   3
  -2  -1  24 10845.2 690.614   8
  -2  -1  24 10418.5 602.399   5
  -2  -1  23 3131.20 357.849   8
   2  -1 -23 3010.35 517.443   1
  -2  -1  23 2381.90 241.655   4
  -2   1  23 2998.91 308.240   5
  -2  -1  23 3069.60 319.266   5
   2   1 -23 2963.69 490.505   1
  -2   1  23 2754.06 451.764   3
  -2   1  23 3190.11 383.426   8
  -2  -1  23 2661.27 467.949   3
  -2  -1  22 2198.99 323.434   8
   2   1 -22 2291.57 461.674   1
   2  -1 -22 2344.08 455.237   1
  -2  -1  22 1933.46 219.485   4
  -2  -1  22 2068.07 258.885   5
  -2   1  22 2048.73 312.146   8
  -2   1  22 1999.89 401.886   3
  -2  -1  22 2057.06 410.546   3
  -2   1  22 2054.54 236.984   5
  -2  -1  21 401.988 126.068   4
  -2  -1  21 271.929 208.594   3
   2   1 -21 411.388 177.979   1
  -2  -1  21 222.715 116.597   8
  -2   1  21 306.303 133.734   5
  -2   1  21 152.887 142.665   3
   2  -1 -21 190.156 174.332   1
  -2   1  21 124.494 153.305   8
  -2  -1  21 249.263 114.927   5
   2  -1 -20 2618.24 455.382   1
  -2  -1  20 2723.17 232.966   4
  -2  -1  20 2355.46 282.689   8
  -2   1  20 2418.76 298.790   8
  -2   1  20 2327.87 240.957   5
  -2  -1  20 2721.62 274.516   5
   2   1 -20 2525.25 442.396   1
  -2  -1  20 2439.73 440.649   3
  -2   1  19 2830.45 264.248   5
  -2  -1  19 2769.87 468.739   3
  -2  -1  19 3020.81 317.067   8
  -2  -1  19 2931.08 288.238   5
  -2   1  19 3340.05 343.834   8
   2  -1 -19 3437.75 522.659   1
   2   1 -19 3295.31 503.453   1
  -2  -1  19 2937.33 230.389   4
  -2   1  19 2674.00 283.617  10
   2  -1 -18 27428.5 1437.21   1
  -2   1  18 24634.8 683.212   5
  -2  -1  18 25860.8 865.847   8
  -2  -1  18 25173.2 632.967   4
  -2   1  18 25537.0 843.023   8
  -2   1  18 24538.0 832.022  10
   2   1 -18 24929.6 1338.86   1
  -2  -1  18 25553.6 755.126   5
  -2  -1  17 407.676 171.686   3
  -2  -1  17 206.223 104.493   8
  -2   1  17 159.749 89.4695  10
  -2  -1  17 280.911 86.5716   4
   2  -1 -17 176.500 151.765   1
  -2   1  17 320.625 164.159   8
  -2  -1  17 333.235 103.753   5
   2   1 -17 357.847 208.178   1
   2   1 -16 1095.67 312.765   1
  -2  -1  16 983.067 252.851   3
  -2  -1  16 1279.07 191.807   8
  -2   1  16 752.707 137.849   8
  -2   1  16 1069.66 175.371  10
  -2  -1  16 1111.32 123.952   4
   2  -1 -16 1225.43 319.042   1
  -2  -1  16 1087.65 154.738   5
   2  -1 -15 6427.57 660.205   1
  -2  -1  15 5695.23 329.882   5
  -2   1  15 4944.13 323.833   8
  -2   1  15 4760.11 336.907  10
  -2  -1  15 5612.91 252.077   4
  -2  -1  15 5265.33 556.557   3
  -2  -1  15 5204.19 364.859   8
   2  -1 -14 23419.9 1188.80   1
  -2  -1  14 23472.2 618.260   5
  -2  -1  14 20926.7 1081.64   3
  -2  -1  13 2288.81 407.418   3
  -2   1  13 1700.01 395.217   1
  -2  -1  13 2825.13 233.591   5
   2  -1 -13 2721.82 450.820   1
  -2   1  12 9096.02 728.544   1
  -2  -1  12 9794.23 363.252   5
   2  -1 -12 10190.2 740.847   1
  -2  -1  12 8524.50 654.059   3
   2  -1 -11 16757.6 930.530   1
   2  -1 -10 10192.3 720.548   1
   2   1 -10 9581.67 586.787   3
   2  -1  -9 41616.4 1347.73   1
   2   1  -9 39574.3 1119.96   3
   2  -1  -8 14133.1 789.441   1
   2   1  -8 13256.8 655.868   3
   2  -1  -7 1255.58 292.357   1
   2   1  -7 1058.01 230.233   3
   2  -1  -6 8538.96 566.773   1
   2   1  -6 7978.78 483.878   3
   2  -1  -5 230.027 161.103   1
   2   1  -5 275.160 146.194   3
   2  -1  -4 22857.2 896.594   1
   2   1  -4 23584.2 803.456   3
   2  -1  -3 2403.21 253.272   1
   2  -1  -3 2299.16 194.147   2
   2   1  -3 2275.10 235.259   3
   2  -1  -2-89.5351 97.9698   2
   2  -1  -2-33.6652 117.452   1
   2   1  -2-20.5410 107.764   3
   2  -1  -1 4919.08 317.658   2
   2  -1  -1 5186.92 345.911   1
   2   1  -1 4898.21 341.333   3
  -2   1   0 18825.1 637.647   1
   2  -1   0 18604.1 643.294   2
   2  -1   0 18457.8 638.073   1
   2   1   0 18468.6 644.125   3
   2   1   1 124.793 76.2765   3
   2  -1   1 242.085 90.6561   2
  -2  -1  -1 130.376 83.3422   3
  -2   1  -1 210.932 70.4244   1
   2  -1   1 355.633 107.502   1
  -2   1  -2 4187.47 223.496   3
   2   1   2 4629.90 304.895   1
  -2   1  -2 4645.96 298.443   1
   2   1   2 4791.01 347.120   3
  -2   1  -3 576.714 82.6900   3
   2   1   3 729.923 148.498   3
  -2   1  -3 710.336 145.227   1
   2   1   3 883.504 151.686   1
  -2  -1  -4 628.734 151.268   1
   2  -1   4 581.988 102.073   3
  -2   1  -4 740.280 113.659   3
   2   1   4 917.534 172.682   2
   2   1   4 817.852 192.198   1
   2  -1   5 667.173 133.235   3
   2   1   5 925.729 202.332   2
  -2  -1  -5 828.576 200.949   1
   2   1   5 902.930 189.727   1
  -2   1  -5 694.835 111.093   3
   2   1   6 15782.8 580.152   1
   2  -1   6 15542.0 478.352   3
  -2   1  -6 16155.0 402.898   3
  -2  -1  -6 14761.2 604.033   1
   2   1   6 15073.0 599.790   2
  -2  -1  -7 556.333 159.363   1
   2   1   7 478.116 144.241   2
   2   1   7 576.691 129.900   1
   2  -1   7 521.575 114.271   3
  -2  -1  -8 2018.59 172.795   7
  -2   1  -8 2561.88 366.238   2
   2  -1   8 2335.55 213.037   3
  -2  -1  -8 2230.86 277.313   1
   2  -1   8 2361.36 150.969   5
   2   1   8 2463.85 254.756   1
  -2  -1  -9 10378.5 590.222   1
  -2  -1  -9 10495.3 554.395   2
   2   1   9 10477.4 545.444   1
   2   1   9 10555.6 373.328  10
  -2   1  -9 10239.2 736.836   2
   2  -1   9 9799.62 373.021   8
   2  -1   9 10371.7 471.594   3
   2  -1   9 11338.5 339.570   5
  -2  -1  -9 10319.6 378.929   7
  -2  -1 -10 9658.78 547.875   2
   2   1  10 10027.2 310.276   8
  -2  -1 -10 9798.34 390.055   7
  -2   1 -10 9103.82 714.688   2
   2  -1  10 9056.65 464.632   3
   2  -1  10 9935.50 395.337   8
  -2  -1 -10 9519.72 589.412   1
   2   1  10 10099.6 551.942   1
   2   1  10 10588.2 404.962  10
   2  -1  10 9879.55 353.538   5
  -2   1 -11 1181.85 280.013   2
   2   1  11 786.595 166.121   1
   2   1  11 1379.25 156.745  10
   2  -1  11 1300.08 198.865   3
  -2  -1 -11 1351.46 256.311   1
   2  -1  11 1192.77 129.252   5
   2   1  11 1252.08 125.634   8
   2  -1  11 1401.86 180.303   8
  -2  -1 -11 990.388 195.672   2
  -2  -1 -11 1168.51 162.917   7
   2  -1  12 4935.92 272.243   5
   2  -1  12 4134.61 285.901   8
   2  -1  12 5054.82 373.091   3
  -2   1 -12 5100.51 554.530   2
   2   1  12 4269.48 236.699   8
  -2  -1 -12 5575.66 484.278   1
  -2  -1 -12 5107.64 416.410   2
   2   1  12 4346.17 275.742  10
  -2  -1 -12 3985.03 280.703   7
   2  -1  13 134.278 98.0303   3
   2  -1  13 5.24326 92.6576   8
   2  -1  13-76.3160 60.5497   5
  -2  -1 -13 122.875 173.951   1
  -2  -1 -13 15.6048 85.7796   7
   2   1  13 13.8533 72.9034   8
  -2   1 -13-82.4810 159.292   2
   2   1  13 151.118 93.4748  10
  -2  -1 -13 115.320 111.191   2
   2  -1  14 949.710 187.318   3
  -2  -1 -14 1135.29 288.525   1
   2  -1  14 1204.91 184.737   8
  -2  -1 -14 1171.95 241.258   2
  -2  -1 -14 1092.65 174.316   7
   2   1  14 1104.39 169.210  10
  -2   1 -14 1068.84 315.642   2
   2  -1  14 1155.10 168.318   5
   2   1  14 1025.55 142.514   8
  -2   1 -15 1164.60 231.780   1
  -2  -1 -15 1150.79 167.835   7
   2  -1  15 1141.08 169.414   8
  -2  -1 -15 1474.55 259.168   2
  -2   1 -15 1156.74 289.988   2
   2  -1  15 1295.93 229.836   3
   2   1  15 1268.08 166.522   8
  -2  -1 -15 1474.67 300.652   1
   2  -1  15 1346.17 172.228   5
  -2   1 -15 1108.05 110.951   7
   2   1  15 1317.09 208.671  10
  -2  -1 -16 5190.96 495.148   2
   2  -1  16 4482.55 427.667   3
  -2  -1 -16 4393.96 314.271   7
   2  -1  16 4032.76 318.533   8
  -2   1 -16 5282.82 486.902   1
  -2   1 -16 4441.34 225.430   7
   2   1  16 3794.85 314.859  10
   2   1  16 4284.83 303.622   8
   2  -1  16 4859.19 315.329   5
  -2   1 -16 4495.31 593.524   2
  -2  -1 -16 5015.98 531.570   1
  -2   1 -17 579.095 194.579   2
   2  -1  17 711.844 182.384   3
  -2  -1 -17 524.141 173.342   2
   2  -1  17 262.086 103.844   8
  -2  -1 -17 416.830 119.429   7
  -2   1 -17 821.224 195.459   1
   2   1  17 303.148 131.059  10
   2   1  17 533.834 131.500   8
  -2  -1 -17 1024.20 280.021   1
   2  -1  17 770.830 146.140   5
   2  -1  18 813.706 153.792   5
   2  -1  18 635.933 159.254   8
   2   1  18 682.614 156.462   8
   2   1  18 499.697 135.663  10
  -2   1 -18 783.004 258.352   2
  -2  -1 -18 523.787 161.320   2
  -2  -1 -18 611.714 219.413   1
   2  -1  18 805.289 194.583   3
  -2  -1 -18 487.087 131.784   7
  -2   1 -18 825.872 240.125   1
  -2   1 -19 3479.26 439.262   1
  -2  -1 -19 3552.73 435.560   2
   2  -1  19 3007.65 306.731   8
  -2  -1 -19 3343.27 466.243   1
   2   1  19 3420.20 318.888   8
  -2  -1 -19 2838.98 277.236   7
   2  -1  19 3498.51 310.583   5
   2   1  19 2875.87 304.638  10
   2  -1  19 3157.80 392.443   3
  -2   1 -19 3120.48 493.665   2
  -2   1 -20 45.3183 140.368   2
  -2  -1 -20 117.517 160.227   1
   2  -1  20 13.0245 101.034   3
   2  -1  20 34.5486 113.923   5
  -2  -1 -20 179.955 117.962   7
  -2  -1 -20 125.937 89.7991   2
   2  -1  20 47.3979 105.906   8
   2   1  20 98.4317 127.475  10
  -2   1 -20-419.917 212.698   1
   2   1  20-48.5663 106.170   8
   2  -1  21 158.798 138.844   3
   2   1  21 181.083 110.477  10
   2   1  21-37.4119 99.8996   8
  -2  -1 -21-102.621 125.934   2
   2   1  21-61.8172 93.8473   3
   2  -1  21 135.636 125.010   8
   2  -1  21 1.88590 95.9068   5
  -2   1 -21-219.819 180.721   2
  -2  -1 -21-98.9719 138.167   1
  -2  -1 -21-63.7056 128.370   7
  -2   1 -21-50.3547 100.793   1
   2   1  22 1670.93 335.982   3
  -2   1 -22 1887.50 402.113   2
  -2  -1 -22 1756.71 220.342   7
  -2  -1 -22 1602.80 335.242   1
  -2   1 -22 2159.88 366.115   1
   2   1  22 1411.06 240.455  10
   2  -1  22 1593.27 292.667   3
   2   1  22 1696.76 247.926   8
   2  -1  22 1989.15 272.391   5
   2  -1  22 1647.81 278.725   8
   2   1  22 1870.54 253.618   5
   2  -1  23 1519.76 261.004   8
   2   1  23 1623.47 251.314   8
   2  -1  23 2164.49 291.461   5
   2  -1  23 2104.15 289.704   4
   2   1  23 2015.94 268.676   5
  -2   1 -23 2098.26 437.904   2
  -2  -1 -23 1600.57 191.486   7
   2   1  23 1700.41 310.098   3
   2  -1  24 831.619 192.976   5
   2   1  24 775.005 183.048   5
   2  -1  24 660.296 195.592   4
   2   1  24 584.025 172.959   8
   2  -1  24 820.815 211.841   8
   2   1  25 161.618 104.790   5
   2   1  25 239.197 113.033   8
   2  -1  25 248.816 139.227   4
   2  -1  25 220.370 135.324   5
   2  -1  25 360.870 195.206   8
   2  -1  26 447.336 185.489   5
   2  -1  26 176.564 156.620   4
   2  -1  26 371.056 130.729   8
   2   1  26 518.410 172.130   8
   2   1  26 486.223 155.395   5
   2   1  27 23.5571 134.509   5
   2  -1  27 74.1389 131.329   4
   2  -1  27 145.767 149.716   5
   2  -1  27-57.2813 153.377   8
   2   1  27-70.9312 133.970   8
   2  -1  28 664.582 237.247   4
   2  -1  28 553.436 185.090   5
   2   1  28 525.175 156.524   8
   2   1  28 856.352 238.698   5
   2  -1  28 447.340 192.245   8
   2   1  29 1213.09 282.289   8
   2  -1  29 1391.80 289.570   4
   2  -1  29 887.624 248.863   8
   2  -1  29 1058.74 248.483   5
   2   1  29 1214.02 247.877   5
   2   1  30-6.57654 112.085   5
   2   1  30-175.188 193.470   8
   2  -1  30 125.115 156.197   5
   2  -1  30 322.404 154.309   8
   2  -1  30 28.9357 131.025   4
   2  -1  31 1317.28 324.329   5
   2  -1  31 1344.48 311.445   8
   2   1  31 1338.41 295.566   8
   2   1  31 1515.21 304.390   5
   2  -1  31 1715.90 376.152   4
   2  -1  32 178.837 202.249   4
   2  -1  32 301.042 205.890   5
   2  -1  32 378.014 188.474   8
   2   1  32 217.176 173.577   8
   2   1  32 492.977 217.052   5
   2   1  33 297.746 166.518   8
   2  -1  33 28.3770 162.945   5
   2  -1  33-123.547 186.665   8
   2   1  33 208.500 164.043   5
   2  -1  33 77.3900 137.627   4
   2   1  34 366.535 221.985   5
   2   1  34 459.161 237.260   8
   2  -1  34 426.848 240.283   4
   2  -1  34 554.819 246.539   8
   2  -1  34 725.762 298.383   5
   2   1  35 148.225 194.188   5
   2  -1  35-211.393 201.076   4
   2   1  35 190.684 153.888   8
   2   1  35-7.32984 176.191   4
   2  -1  35 95.9270 184.636   5
   2   1  36 583.016 257.249   4
   2   1  36 86.7735 195.474   8
   2   1  36 12.0720 163.032   5
   2  -1  36-303.228 195.512   4
   2  -1  36 236.534 237.356   5
   2  -1  37 148.159 185.409   4
   2   1  37 318.910 182.019   4
   2  -1  37 188.337 153.745   5
   2   1  37 10.5796 172.385   5
   2   1  37 98.1081 182.614   8
   2  -1  38 224.497 201.181   5
   2   1  38 39.5622 153.555   5
   2   1  38 332.667 195.007   8
   2   1  38 187.847 156.798   4
   2   1  39-338.813 197.234   4
   2  -1  39-151.341 177.608   5
   2   1  39-217.913 258.658   5
   2   1  39 89.1939 147.535   8
   2   1  40-30.1526 159.021   5
   2   1  40-16.6343 167.120   8
   2  -1  40 345.001 281.446   5
   2  -1  41 69.6325 209.773   5
   2   1  41 313.341 182.571   5
   2  -1  42 48.0834 203.826   5
   2   1  42 423.418 247.059   5
   2   1  43 409.273 179.816   5
   2  -1  43 339.583 312.830   5
   2   1  44 94.2547 166.907   5
   2  -1  44 15.6327 212.733   5
  -2  -2  46 767.994 267.889   5
  -2   2  46-519.935 266.111   5
  -2  -2  45 242.678 250.126   5
  -2   2  45 71.6225 268.752   8
  -2   2  45 327.531 179.995   5
  -2   2  44 205.209 179.834   8
  -2   2  44 137.925 174.790   5
  -2  -2  44 64.3943 185.107   5
  -2  -2  43 67.8872 206.270   5
  -2   2  43 132.322 205.378   8
  -2   2  43-25.0694 141.066   5
  -2   2  42 277.697 243.972   5
  -2   2  42 54.1510 210.542   8
  -2  -2  42-239.595 272.437   5
  -2   2  41 83.4350 184.072   5
  -2   2  41-104.773 200.901   8
  -2  -2  41 82.7283 213.418   5
  -2   2  40 64.1122 218.106   8
  -2   2  40-115.444 145.392   5
  -2  -2  40-95.8280 167.229   5
  -2   2  39 306.420 232.905   5
  -2  -2  39 231.477 165.231   5
  -2   2  39 282.847 196.297   8
  -2   2  38-183.799 248.086   8
  -2  -2  38-53.3362 205.616   8
  -2   2  38-69.2602 161.674   5
  -2  -2  38-132.522 219.476   5
  -2   2  37 330.920 227.949   5
  -2   2  37 651.690 293.781   8
  -2  -2  37 648.429 276.263   8
  -2  -2  37 410.849 247.619   5
  -2  -2  36 260.968 264.173   8
  -2   2  36 182.257 281.213   8
  -2   2  36 136.272 132.590   5
  -2  -2  36 274.844 216.436   5
  -2  -2  35 107.525 191.569   5
  -2  -2  35 584.818 279.868   8
  -2   2  35 203.099 128.972   5
  -2   2  34-14.2387 202.604   8
  -2  -2  34 47.2682 178.625   8
  -2  -2  34 208.156 161.531   5
  -2   2  34 73.0026 182.563   5
  -2   2  33 522.744 259.267   8
  -2  -2  33 359.605 243.413   5
  -2   2  33 0.15474 131.453   5
  -2  -2  33 119.343 213.691   8
  -2   2  32-107.027 240.472   8
  -2   2  32 6.37864 115.852   5
  -2  -2  32-158.848 156.858   5
  -2  -2  32 225.079 192.717   8
  -2   2  31 288.419 237.090   8
  -2   2  31 93.4540 133.228   5
  -2  -2  31 189.606 183.364   8
  -2  -2  31 306.931 181.501   5
  -2  -2  30 285.622 209.987   8
  -2   2  30 657.167 260.315   8
  -2  -2  30 314.157 201.534   5
  -2   2  30 315.523 138.105   5
  -2   2  29 1087.73 271.149   8
  -2  -2  29 1295.95 306.482   8
  -2  -2  29 1205.71 264.836   5
  -2   2  29 1144.37 237.234   5
  -2  -2  28 35.4554 166.524   8
  -2   2  28 132.208 132.777   5
  -2   2  28 75.0420 144.679   8
  -2  -2  28 61.8898 171.773   5
  -2   2  27-83.3840 138.127   8
  -2  -2  27 180.577 163.115   8
  -2   2  27 82.3379 91.6780   5
  -2   2  26 1465.48 276.122   8
  -2  -2  26 1781.02 298.995   5
  -2  -2  26 1984.41 332.938   8
  -2  -2  26 1737.24 224.464   4
  -2   2  26 1689.79 253.632   5
  -2   2  25 117.669 107.513   5
  -2  -2  25 254.501 173.998   8
  -2  -2  25-2.91385 122.913   5
  -2   2  25 373.955 189.855   8
  -2   2  25 158.161 135.917  10
  -2  -2  25 364.267 134.146   4
  -2   2  24 167.579 113.279   5
  -2  -2  24 239.874 143.930   8
  -2  -2  24 89.8200 114.753   5
  -2   2  24 242.990 172.220   8
  -2   2  24 181.545 123.061  10
  -2  -2  24 157.821 98.4789   4
  -2   2  23 243.356 150.243   8
  -2  -2  23 187.373 127.098   5
  -2  -2  23 124.434 87.7977   4
  -2  -2  23 293.701 164.254   8
  -2   2  23 305.310 157.330  10
   2  -2 -23 506.058 231.463   1
  -2  -2  23-191.263 212.011   3
   2   2 -23 342.750 198.189   1
  -2  -2  22 2093.48 305.423   8
  -2   2  22 2092.69 291.891  10
  -2  -2  22 2362.82 434.621   3
   2   2 -22 2683.86 488.304   1
   2  -2 -22 2861.44 544.498   1
  -2  -2  22 2002.82 215.024   4
  -2  -2  22 2591.27 312.380   5
  -2   2  22 2094.60 293.366   8
  -2  -2  21 461.243 165.678   8
  -2   2  21 477.287 164.275  10
  -2  -2  21 816.500 278.306   3
  -2  -2  21 770.993 169.372   5
  -2   2  21 241.667 122.517   8
  -2  -2  21 588.709 111.849   4
   2  -2 -21 749.721 242.621   1
  -2  -2  20 79.1794 90.3445   5
  -2   2  20 326.420 136.431  10
  -2  -2  20-144.706 122.160   8
  -2  -2  20 84.9099 94.4000   4
  -2  -2  20 213.466 141.653   3
  -2   2  20 88.6311 139.996   8
   2  -2 -20 397.979 241.710   1
   2  -2 -20-65.4507 76.6596   2
  -2  -2  19 1014.37 154.916   4
   2  -2 -19 1209.81 365.165   1
  -2  -2  19 850.508 305.152   3
   2  -2 -19 908.558 150.536   2
  -2  -2  19 1170.26 228.463   8
  -2   2  19 1058.27 201.998  10
  -2  -2  19 821.780 171.670   5
  -2   2  19 1361.75 231.867   8
  -2  -2  18 1055.71 188.172   5
   2  -2 -18 1249.00 363.519   1
   2  -2 -18 983.092 193.523   7
  -2  -2  18 1443.79 368.819   3
  -2   2  18 948.773 189.196  10
  -2   2  18 1275.67 387.720   1
  -2   2  18 1031.89 201.622   8
  -2  -2  18 1353.95 224.428   8
  -2  -2  18 1231.48 162.158   4
  -2  -2  17 384.690 114.626   5
   2  -2 -17 220.723 199.164   1
   2  -2 -17 462.837 118.847   7
  -2   2  17 475.392 157.787   8
  -2   2  17 339.104 126.486  10
  -2   2  17 171.726 163.581   1
  -2  -2  17 401.302 141.804   8
  -2  -2  17 278.406 234.890   3
  -2  -2  17 236.839 79.9771   4
  -2   2  16 434.207 124.669  10
  -2   2  16 581.915 182.660   1
  -2  -2  16 512.998 224.903   3
   2  -2 -16 468.626 144.452   7
   2  -2 -16 561.241 250.266   1
  -2  -2  16 453.189 106.735   5
  -2  -2  16 504.286 93.0292   4
  -2   2  16 774.157 170.868   8
  -2  -2  16 487.982 159.921   8
  -2  -2  15 211.074 92.3568   5
  -2  -2  15 159.388 136.637   3
   2   2 -15 222.374 138.260   3
  -2   2  15 504.573 132.807  10
  -2   2  15 244.475 207.548   1
   2  -2 -15 423.057 138.457   7
  -2  -2  15 440.909 151.600   8
  -2  -2  15 154.867 72.9897   4
  -2   2  15 633.660 176.639   8
   2  -2 -15 407.415 224.924   1
  -2   2  14 4001.41 561.094   1
  -2  -2  14 3386.95 296.517   8
  -2   2  14 3578.83 288.771   8
  -2   2  14 3383.71 288.491  10
  -2  -2  14 3484.55 501.094   3
   2   2 -14 3250.85 424.669   3
   2  -2 -14 3481.34 292.106   7
  -2  -2  14 3401.43 260.713   5
   2  -2 -14 3803.45 559.137   1
  -2  -2  14 2822.20 206.941   4
  -2   2  13 1576.12 375.970   1
  -2   2  13 1410.22 178.214  10
  -2  -2  13 1851.07 357.281   3
  -2  -2  13 1551.28 169.277   5
   2   2 -13 1318.46 279.624   3
  -2  -2  13 1309.59 172.686   8
  -2  -2  13 1666.47 145.552   4
   2  -2 -13 1949.80 377.920   1
  -2   2  13 1600.40 187.580   8
   2  -2 -13 1657.91 200.779   7
   2   2 -12 7450.21 592.172   3
  -2  -2  12 7677.43 674.868   3
  -2   2  12 8145.61 728.762   1
   2  -2 -12 8363.23 777.614   1
   2  -2 -12 6700.00 367.825   7
  -2  -2  11 9959.78 739.741   3
   2  -2 -11 10142.2 442.970   7
   2   2 -11 9800.52 661.716   3
   2  -2 -11 10659.8 853.740   1
   2  -2 -10 122.621 48.4832   2
   2  -2 -10 150.027 110.099   7
   2  -2 -10 248.809 258.903   1
   2   2 -10 175.629 157.266   3
  -2  -2  10 92.0141 128.706   3
   2  -2  -9 4208.46 273.002   7
   2  -2  -9 4606.02 518.197   1
   2   2  -9 4510.22 443.211   3
   2  -2  -9 4070.76 205.811   2
   2   2  -8 14922.5 801.437   3
   2  -2  -8 15065.4 928.185   1
   2  -2  -8 12828.5 386.422   2
   2  -2  -7 12353.4 813.628   1
   2   2  -7 12687.8 719.911   3
  -2   2   7 12966.6 390.981  10
   2  -2  -7 11806.4 394.605   2
   2  -2  -6 224.052 95.7361   2
   2   2  -6 20.2766 164.030   3
   2  -2  -6 119.764 156.742   1
   2  -2  -5 20194.1 995.825   1
   2   2  -5 18215.3 864.689   3
   2   2  -4 6768.26 561.200   3
  -2   2   4 6850.02 378.356   2
   2  -2  -4 6896.28 597.641   1
   2  -2  -3 15695.7 856.086   1
   2   2  -3 14874.7 779.061   3
  -2   2   3 16137.0 593.492   2
   2   2  -2 1340.34 321.932   3
   2  -2  -2 1036.54 296.203   1
  -2   2   2 904.276 204.956   2
   2   2  -1 928.098 290.929   3
   2  -2  -1 915.665 289.528   1
  -2   2   1 835.258 233.092   2
   2   2   0 835.642 289.063   3
  -2   2   0 1119.20 296.581   2
   2  -2   0 861.454 290.505   1
  -2   2   0 973.431 303.032   1
   2   2   1 356.663 243.278   1
  -2   2  -1 491.568 276.284   2
   2  -2   1 602.114 280.854   1
   2   2   1 546.679 229.608   3
  -2   2  -1 582.178 260.782   1
   2   2   2 739.044 254.026   3
  -2   2  -2 1224.99 295.287   1
  -2   2  -2 1075.33 246.003   3
   2   2   2 791.450 242.152   1
  -2   2  -3 481.508 183.125   3
  -2   2  -3 185.900 151.061   1
   2   2   3 509.507 232.001   3
   2   2   3 334.015 170.788   1
   2   2   4 843.818 238.819   1
  -2   2  -4 1122.05 229.244   3
  -2  -2  -4 913.310 235.132   1
   2   2   4 797.060 244.845   3
  -2   2  -4 987.360 218.565   1
   2  -2   5 5817.91 405.693   3
  -2   2  -5 5901.52 398.621   3
  -2   2  -5 6106.79 502.864   1
  -2  -2  -5 6082.55 515.926   1
   2   2   5 6628.21 509.187   1
   2   2   6 3151.68 232.244  10
   2  -2   6 3566.54 324.825   3
  -2   2  -6 3502.72 308.941   3
   2   2   6 3671.72 379.437   1
   2  -2   6 3708.32 175.856   5
  -2  -2  -6 3558.55 405.656   1
   2  -2   7 858.497 108.547   5
   2  -2   7 636.607 155.528   3
   2   2   7 679.404 135.177   2
   2   2   7 878.749 140.215  10
   2   2   7 548.643 172.091   1
  -2   2  -7 641.084 152.088   3
  -2  -2  -7 558.300 211.687   1
   2   2   8 223.224 111.193  10
  -2  -2  -8 151.610 101.912   7
   2   2   8 203.373 167.492   1
   2  -2   8 57.3764 81.0012   5
  -2  -2  -8-3.09226 119.069   1
   2   2   8-58.8916 93.1835   2
   2  -2   8-21.7719 113.430   3
  -2   2  -8-2.39637 96.8123   3
   2  -2   9 2064.56 279.568   3
   2   2   9 2191.92 324.606   1
  -2  -2  -9 1513.92 207.362   7
   2   2   9 1517.49 175.922  10
   2  -2   9 2163.78 170.792   5
   2   2   9 1910.80 215.206   2
   2  -2   9 1994.92 210.919   4
  -2   2  -9 2349.38 259.747   3
   2   2   9 1603.72 140.313   8
  -2  -2  -9 2017.53 333.385   1
  -2   2 -10 3379.62 305.356   3
   2   2  10 3163.66 187.993   8
   2  -2  10 3387.51 266.301   4
   2   2  10 3542.08 406.755   1
  -2  -2 -10 2958.16 260.400   7
   2  -2  10 3187.06 351.479   3
  -2  -2 -10 3324.77 415.977   1
   2  -2  10 3365.01 222.454   5
   2   2  10 2927.02 244.410  10
   2  -2  11 827.303 186.762   3
   2   2  11 1366.43 171.585  10
   2   2  11 757.019 187.400   1
   2  -2  11 969.420 129.572   5
  -2  -2 -11 1307.76 188.438   7
  -2   2 -11 797.571 141.185   3
   2  -2  11 1000.05 169.725   4
  -2  -2 -11 729.329 246.012   1
   2   2  11 1403.16 128.670   8
   2   2  12 9152.94 443.445  10
   2  -2  12 8445.76 446.979   6
  -2  -2 -12 8515.15 447.965   7
   2  -2  12 7954.83 574.304   3
   2   2  12 9122.97 357.954   8
   2  -2  12 7891.23 424.165   4
  -2  -2 -12 8386.99 697.362   1
   2   2  12 8760.28 634.014   1
   2  -2  12 8549.43 381.669   5
   2  -2  13 12206.9 717.292   3
   2   2  13 12670.5 543.435  10
  -2  -2 -13 14105.7 934.669   1
   2  -2  13 12397.3 540.149   4
  -2  -2 -13 12456.5 556.347   7
   2   2  13 13018.2 451.333   8
   2   2  13 13385.6 836.822   1
   2  -2  13 12685.0 486.456   5
   2  -2  13 12131.7 548.959   6
   2   2  14 133.582 96.7336  10
   2  -2  14 238.744 114.952   3
   2  -2  14 380.744 106.703   5
   2  -2  14 258.585 105.328   4
   2  -2  14 155.255 101.195   8
   2   2  14 113.783 136.765   1
  -2  -2 -14 294.524 153.626   1
  -2  -2 -14 396.623 99.8847   7
   2   2  14 277.626 96.9259   8
   2  -2  15 96.9782 93.3745   8
   2   2  15 168.696 107.366  10
  -2  -2 -15 237.072 146.957   7
   2  -2  15 104.408 82.2386   5
   2   2  15 63.2919 77.6228   8
   2  -2  15 7.83842 108.559   3
   2  -2  15 290.347 102.297   4
   2   2  15 101.544 127.076   1
  -2  -2 -15 133.769 174.692   1
  -2  -2 -16 771.313 255.736   1
   2  -2  16 798.314 184.513   4
   2  -2  16 842.492 221.362   3
   2   2  16 738.723 154.201  10
   2   2  16 762.899 228.351   1
   2  -2  16 679.231 136.697   5
   2  -2  16 986.391 184.383   8
  -2  -2 -16 849.603 168.855   7
   2   2  16 762.178 142.909   8
   2   2  17-33.7306 126.229  10
  -2  -2 -17 219.630 176.140   1
   2  -2  17 69.4331 111.790   4
   2  -2  17 226.088 134.458   8
  -2  -2 -17-5.36003 148.497   7
   2  -2  17 238.714 131.049   5
   2  -2  17-50.5259 103.875   3
   2   2  17 220.915 107.501   8
  -2  -2 -18 56.7978 130.650   1
  -2  -2 -18 363.459 172.518   7
  -2   2 -18 259.466 229.514   2
   2   2  18 28.3624 106.205  10
   2  -2  18 105.232 136.918   8
   2  -2  18 11.4200 107.224   4
   2  -2  18 65.4792 88.7977   5
   2   2  18 12.2487 94.0204   8
   2  -2  18 271.838 148.472   3
   2  -2  19 249.937 157.225   3
  -2  -2 -19 146.915 150.783   7
   2  -2  19 485.875 149.976   5
   2  -2  19 397.843 150.531   8
   2   2  19 220.076 138.344   8
  -2   2 -19 475.030 229.188   2
  -2  -2 -19 325.813 219.781   1
   2   2  19 462.959 187.712  10
   2  -2  19 125.357 125.689   4
   2  -2  20 79.4692 113.756   4
  -2  -2 -20 281.850 158.554   7
  -2   2 -20 277.278 206.309   2
   2   2  20 81.2543 131.946  10
   2  -2  20 259.478 142.728   3
  -2   2 -20 292.281 176.128   1
  -2  -2 -20 255.535 164.648   1
   2  -2  20 160.840 139.259   8
   2  -2  20 242.816 118.173   5
   2   2  20 222.719 99.7163   8
   2  -2  21 408.313 156.803   4
  -2  -2 -21 547.363 229.449   1
   2  -2  21 702.162 207.759   8
   2   2  21 471.258 170.448  10
  -2   2 -21 415.322 182.637   1
   2  -2  21 297.198 127.109   5
   2   2  21 328.829 141.202   8
  -2  -2 -21 361.175 130.608   7
   2  -2  21 365.665 173.484   3
   2   2  22 528.188 192.683  10
   2  -2  22 548.202 185.058   5
  -2  -2 -22 246.900 177.182   7
   2  -2  22 196.601 124.719   8
   2   2  22 375.369 151.776   8
   2  -2  22 587.985 193.939   4
   2   2  23 2592.50 336.642  10
  -2  -2 -23 2597.07 302.414   7
   2   2  23 2716.14 311.528   8
   2  -2  23 2790.54 327.785   5
   2  -2  23 2600.61 324.310   4
   2  -2  23 2447.61 335.739   8
  -2  -2 -24 289.843 114.582   7
   2  -2  24 323.182 133.221   5
   2  -2  24 261.671 151.617   4
   2  -2  24 200.870 144.988   8
   2   2  24 111.107 103.783   8
   2   2  24 274.889 109.037  10
   2  -2  25 747.792 219.047   5
  -2  -2 -25 345.104 108.249   7
   2  -2  25 488.990 203.556   8
   2  -2  25 304.958 120.950   4
   2   2  25 353.013 145.465   8
   2   2  25 198.047 153.168  10
  -2  -2 -26 135.204 116.847   7
   2   2  26 189.592 125.513  10
   2  -2  26 17.8637 108.869   5
   2   2  26 189.648 139.893   8
   2  -2  26 3.24252 114.541   8
   2  -2  26 226.814 180.260   4
   2   2  26 73.6104 99.4828   5
   2  -2  27 5.24457 137.798   4
   2   2  27 200.359 116.099   8
   2   2  27 150.907 120.558   5
   2  -2  27 84.6928 120.200   5
   2  -2  27 6.96084 124.855   8
   2   2  28 176.661 148.913   8
   2   2  28-86.9970 142.757   5
   2  -2  28 385.444 218.865   5
   2  -2  28 93.5173 156.555   4
   2   2  29 95.1543 161.644   8
   2   2  29 75.8944 122.849   5
   2  -2  29 168.609 175.855   4
   2  -2  29 175.615 182.555   5
   2  -2  30-0.17711 142.688   5
   2  -2  30 78.1383 157.964   4
   2   2  30-86.9203 138.435   8
   2   2  30 213.958 153.264   5
   2   2  31 148.578 142.984   8
   2  -2  31 630.365 252.733   5
   2  -2  31 309.676 231.448   4
   2   2  31 539.131 219.742   5
   2   2  32 395.850 169.684   8
   2  -2  32 443.100 212.521   4
   2   2  32 242.236 131.660   5
   2  -2  32 177.533 170.523   5
   2  -2  33-202.575 178.337   5
   2   2  33 0.17782 135.327   5
   2   2  33 116.953 151.690   8
   2  -2  33-87.4946 151.061   4
   2   2  34 92.5799 175.301   5
   2  -2  34 196.345 150.945   4
   2   2  34 313.631 251.633   8
   2  -2  34 132.770 207.546   5
   2  -2  35 83.2275 175.879   5
   2   2  35 288.591 220.455   5
   2   2  35 312.399 249.475   8
   2  -2  35 214.635 189.778   4
   2  -2  36 83.0942 170.459   5
   2   2  36-93.3968 157.132   5
   2   2  36 299.541 258.227   8
   2  -2  36-2.36697 153.758   4
   2   2  37 356.834 154.978   8
   2  -2  37 552.420 287.527   5
   2   2  37 403.034 205.694   5
   2   2  38 798.419 257.785   5
   2   2  38 997.545 340.501   8
   2  -2  38 1137.13 323.286   5
   2  -2  39-258.403 225.186   5
   2   2  39 464.544 269.217   5
   2   2  40 98.6670 198.245   5
   2  -2  40-226.186 251.765   5
   2  -2  41 396.935 249.305   5
   2   2  41-96.5271 162.761   5
   2   2  42 224.836 198.753   5
   2  -2  42 15.9458 169.756   5
   2   2  43-240.363 225.944   5
   2  -2  43 83.5107 162.519   5
   2  -2  44 262.022 200.337   5
   2   2  44-170.197 151.612   5
  -2   3  45-219.785 260.229   8
  -2   3  45-63.0425 157.914   5
  -2  -3  45 91.5126 178.963   5
  -2   3  44-53.6292 178.996   8
  -2   3  44-376.692 218.242   5
  -2  -3  44-429.267 221.285   5
  -2   3  43-83.4086 207.596   5
  -2   3  43 407.365 292.958   8
  -2  -3  43-74.7752 187.811   5
  -2   3  42-34.0220 146.077   5
  -2   3  42 240.236 297.882   8
  -2  -3  42 381.616 272.493   5
  -2   3  41 97.0287 150.011   5
  -2   3  41 184.613 216.803   8
  -2  -3  41 269.153 176.787   5
  -2  -3  40-251.955 254.295   5
  -2   3  40 17.5492 246.526   8
  -2   3  40 86.5296 185.024   5
  -2   3  39 69.9739 195.877   8
  -2   3  39 13.8716 133.414   5
  -2  -3  39 154.618 238.840   5
  -2   3  38-314.405 228.824   8
  -2  -3  38 6.02861 182.761   5
  -2   3  38-46.6889 139.506   5
  -2   3  37 342.821 311.782   8
  -2   3  37 9.18138 147.573   5
  -2  -3  37-68.9502 213.211   5
  -2   3  36 29.1091 142.726   5
  -2   3  36-260.813 266.951   8
  -2  -3  36-148.205 201.564   5
  -2   3  35 1143.01 347.504   8
  -2  -3  35 1433.41 359.227   5
  -2   3  35 1325.90 283.586   5
  -2   3  34 198.531 203.896   8
  -2   3  34 322.367 177.442   5
  -2  -3  34-216.268 200.919   5
  -2   3  33 503.619 328.641   8
  -2   3  33 267.978 168.394   5
  -2  -3  33 596.441 255.369   5
  -2   3  32 223.313 143.809   5
  -2   3  32 427.330 234.553   8
  -2   3  31 771.697 287.135   8
  -2   3  31 876.104 235.391   5
  -2  -3  31 739.432 254.627   5
  -2   3  30-244.203 158.858   5
  -2  -3  30 172.361 166.572   5
  -2  -3  30-152.286 194.655   8
  -2   3  30-95.7065 157.384   8
  -2  -3  29 234.368 172.759   8
  -2   3  29-107.251 177.113   8
  -2  -3  29-280.315 162.774   5
  -2   3  29 291.601 144.210   5
  -2  -3  28 108.240 177.478   8
  -2   3  28 99.5432 156.475  10
  -2   3  28 10.2480 156.437   8
  -2  -3  28 268.427 170.325   5
  -2   3  28 353.976 151.862   5
  -2   3  27 35.2376 87.2171   5
  -2  -3  27 84.1729 136.735   5
  -2  -3  27 154.868 138.901   8
  -2   3  27-37.2029 170.334  10
  -2   3  27 32.1687 133.824   8
  -2   3  26 1502.85 326.260   8
  -2   3  26 1404.38 302.857  10
  -2  -3  26 1038.37 267.777   8
  -2  -3  26 1627.68 321.862   5
  -2  -3  25-40.5493 91.9692   4
  -2  -3  25-103.621 134.163   5
  -2   3  25-45.7730 170.315   8
  -2   3  25-57.6334 131.122  10
  -2  -3  25 200.280 136.841   8
  -2  -3  24 401.000 198.497   5
  -2   3  24 210.471 153.448   8
  -2  -3  24 272.980 132.618   8
  -2   3  24 374.541 195.001  10
  -2  -3  24 356.795 124.922   4
  -2  -3  23 509.413 199.295   5
  -2  -3  23 283.422 115.448   4
  -2  -3  23 652.077 235.580   8
  -2   3  23 553.373 189.261  10
  -2   3  23 253.709 154.223   8
  -2  -3  22 1827.19 288.634   5
  -2   3  22 1692.28 289.835  10
  -2  -3  22 1459.99 373.076   3
  -2  -3  22 1781.98 319.593   8
  -2   3  22 1954.63 298.268   8
  -2  -3  22 1492.22 219.530   4
   2  -3 -21 268.244 167.767   1
  -2   3  21 424.540 165.263  10
  -2   3  21 760.214 296.277   1
  -2   3  21 727.022 201.642   8
  -2  -3  21 366.036 128.776   4
  -2  -3  21 750.701 232.834   8
  -2  -3  21 490.603 213.047   3
  -2  -3  21 745.059 219.434   5
   2  -3 -20 192.428 192.799   1
  -2   3  20 339.683 167.158   8
  -2  -3  20 328.585 188.448   8
  -2   3  20 139.882 135.234  10
  -2   3  20 349.728 290.280   1
  -2  -3  20 150.959 102.736   5
  -2  -3  20-13.6414 94.7261   4
  -2  -3  20-56.4356 163.828   3
  -2   3  19 571.835 178.058  10
  -2   3  19 754.655 203.236   8
  -2  -3  19 803.441 252.703   3
  -2  -3  19 510.986 110.297   4
  -2  -3  19 535.229 163.711   8
  -2  -3  19 856.209 186.311   5
   2  -3 -19 442.858 219.288   1
  -2   3  19 412.805 221.139   1
   2   3 -18 537.171 184.109   3
  -2   3  18 641.209 170.616  10
   2  -3 -18 864.982 318.641   1
  -2  -3  18 466.243 142.534   5
   2  -3 -18 677.081 213.168   7
  -2   3  18 750.786 320.680   1
  -2  -3  18 897.507 309.476   3
  -2  -3  18 485.594 180.627   8
  -2  -3  18 456.778 113.836   4
  -2   3  18 603.310 169.435   8
  -2   3  17 1437.10 230.896   8
  -2   3  17 1225.70 228.015  10
  -2  -3  17 1128.72 171.333   4
  -2   3  17 1410.27 409.633   1
   2  -3 -17 942.681 375.411   1
  -2  -3  17 1304.89 360.754   3
  -2  -3  17 1022.99 190.235   5
   2   3 -17 1378.50 333.255   3
  -2  -3  17 1160.26 207.697   8
   2  -3 -17 1206.68 234.059   7
  -2   3  16 1963.39 441.967   1
   2  -3 -16 1289.08 360.476   1
  -2  -3  16 1433.86 211.807   5
  -2  -3  16 1391.70 177.613   4
  -2  -3  16 1415.68 230.106   8
   2   3 -16 1464.89 305.994   3
  -2   3  16 1543.72 215.123   8
  -2   3  16 1306.69 211.216  10
   2  -3 -16 1495.94 259.846   7
  -2  -3  16 1121.24 314.765   3
   2  -3 -15 1415.01 368.019   1
  -2   3  15 1344.58 362.238   1
   2  -3 -15 1347.76 233.757   7
  -2   3  15 1343.33 205.064  10
  -2  -3  15 1719.52 376.449   3
  -2  -3  15 1367.24 198.639   5
   2   3 -15 1537.62 313.886   3
  -2   3  15 1477.37 212.439   8
  -2  -3  15 1158.38 158.948   4
  -2  -3  15 1336.37 211.613   8
  -2   3  14 4933.03 667.670   1
   2  -3 -14 4372.37 675.835   1
  -2  -3  14 4523.03 597.013   3
  -2  -3  14 4243.57 339.005   5
  -2   3  14 4741.07 358.563   8
   2   3 -14 4637.69 541.820   3
  -2   3  14 4537.84 354.057  10
  -2  -3  14 4135.70 276.021   4
   2  -3 -14 4702.05 394.859   7
  -2  -3  13 139.856 113.841   5
  -2   3  13-11.6843 88.1351  10
  -2  -3  13 228.660 116.814   3
   2  -3 -13 198.526 168.427   7
  -2   3  13 217.422 138.926   8
  -2  -3  13 144.756 76.6124   4
   2  -3 -13 377.341 286.564   1
   2   3 -13 144.565 149.037   3
  -2   3  12 429.767 125.925  10
  -2  -3  12 519.712 234.143   3
   2   3 -12 432.195 169.723   3
  -2   3  12 437.644 147.040   8
   2  -3 -12 492.932 170.853   7
  -2  -3  12 446.487 115.330   5
  -2  -3  12 192.935 70.3766   4
   2  -3 -12 310.084 223.644   1
  -2   3  12 412.485 238.152   1
  -2  -3  11 4590.30 312.975   5
  -2   3  11 4890.69 616.566   1
  -2  -3  11 4249.69 280.241   4
  -2  -3  11 4402.74 558.633   3
   2  -3 -11 4544.22 598.083   1
  -2   3  11 4268.26 309.166   8
   2   3 -11 4499.10 516.239   3
   2  -3 -11 4256.80 353.836   7
  -2   3  11 4329.00 329.396  10
  -2   3  10 499.938 151.855   8
  -2   3  10 719.355 344.582   1
   2  -3 -10 181.293 277.693   1
  -2   3  10 798.499 176.583  10
   2   3 -10 489.240 274.651   3
   2  -3 -10 70.2208 168.956   7
  -2  -3  10 13.9154 86.8633   4
  -2  -3  10 515.613 281.018   3
  -2  -3  10 277.699 112.840   5
   2  -3  -9 6760.24 402.265   7
  -2  -3   9 6453.87 650.834   3
   2   3  -9 6559.75 592.793   3
  -2   3   9 6430.27 373.710  10
   2  -3  -9 6810.55 714.707   1
  -2  -3   9 6521.14 335.580   4
  -2  -3   8 11519.4 865.615   3
  -2  -3   8 10944.3 423.747   4
   2   3  -8 10467.0 767.621   3
  -2   3   8 9580.58 427.074  10
   2  -3  -8 11236.4 891.301   1
  -2  -3   7 6325.08 321.859   4
   2   3  -7 6365.98 567.776   3
   2  -3  -7 6644.39 699.635   1
  -2   3   7 6235.29 351.469  10
  -2   3   6 7375.81 357.315  10
   2  -3  -6 6204.80 648.120   1
  -2   3   6 6207.45 344.070   2
   2   3  -6 6274.37 569.128   3
   2   3  -6 7963.44 323.539  12
  -2  -3   6 6852.03 348.036   4
   2   3  -5 3970.87 455.457   3
   2  -3  -5 3674.05 505.159   1
  -2  -3   5 2706.19 256.172   4
  -2   3   5 3914.51 301.734   2
  -2   3   5 4026.76 258.879  10
   2  -3  -4 2233.84 272.049   6
  -2   3   4 1089.51 342.057   2
  -2   3   4 2544.06 311.923  10
   2   3  -4 2405.86 547.381   3
   2  -3  -4 3450.58 529.374   1
   2  -3  -3 327.815 200.458   1
   2  -3  -3 364.665 79.9891   6
   2   3  -3 452.191 178.812   3
  -2   3   3 372.102 84.4961  10
  -2   3   3 632.003 172.323   2
  -2  -3   2 4891.44 246.377   7
   2  -3  -2 4884.92 260.138   6
   2   3  -2 4897.13 500.348   3
   2  -3  -2 5087.93 575.013   1
  -2   3   2 5079.31 401.739   2
   2   3  -1 4715.37 622.202   3
   2  -3  -1 4965.35 475.149   6
  -2   3   1 3817.46 407.238   2
  -2  -3   1 3986.21 239.881   7
   2  -3  -1 5499.19 1051.96   1
  -2   3   0 80591.9 2205.05   1
   2  -3   0 79708.5 1031.32   6
  -2   3   0 79714.8 2001.48   3
   2  -3   0 78322.0 2210.59   1
  -2  -3   0 79326.7 1154.00  11
   2  -3   0 78748.2 955.977   5
   2   3   0 79242.4 2133.13   3
  -2  -3   0 80817.0 1080.72   7
   2   3   0 76079.5 2186.56   1
  -2   3   0 77890.7 1835.05   2
   2  -3   1 95925.2 1067.56   5
   2  -3   1 95884.9 1138.40   6
  -2   3  -1 96296.4 2186.85   3
  -2   3  -1 95613.6 2399.16   1
   2   3   1 98646.1 2379.75   3
  -2  -3  -1 96172.1 1230.44   7
   2   3   1 96046.9 2409.28   1
  -2  -3  -1 96181.9 1233.86  11
   2  -3   2 7807.67 335.664   6
  -2  -3  -2 7443.50 337.207  11
  -2   3  -2 8573.70 715.932   1
   2   3   2 8944.75 736.947   1
   2  -3   2 8209.03 308.071   5
   2   3   2 8479.38 702.463   3
  -2   3  -2 8237.92 621.036   3
   2   3   3 14563.6 929.750   3
   2  -3   3 14642.6 475.498   6
   2   3   3 13700.1 445.886  13
   2   3   3 14313.3 917.656   1
  -2   3  -3 14322.5 935.350   1
  -2  -3  -3 13542.4 469.610  11
  -2   3  -3 13833.5 798.250   3
   2  -3   3 14652.4 419.746   5
  -2   3  -4 1411.89 335.252   3
   2   3   4 879.327 411.145   3
   2  -3   4 1583.02 204.621   5
   2  -3   4 1173.13 224.324   6
  -2  -3  -4 476.647 165.397  11
   2   3   4 1364.15 369.573   1
  -2   3  -4 1650.04 409.925   1
   2  -3   5 6547.04 342.835   5
  -2   3  -5 5269.70 590.346   1
   2   3   5 5656.66 678.116   1
  -2   3  -5 6023.59 552.963   3
  -2  -3  -5 6191.97 377.754  11
   2  -3   5 6454.80 374.054   6
   2   3   5 5429.86 648.803   3
  -2   3  -6 30120.6 1112.69   3
  -2  -3  -6 31065.9 739.147  11
   2  -3   6 31264.4 750.222   6
  -2   3  -6 30977.5 1384.80   1
   2  -3   6 31274.9 680.007   5
  -2  -3  -6 32059.4 1422.55   1
   2   3   6 31128.2 1377.55   1
   2   3   7 7946.02 438.685  10
   2  -3   7 8680.76 441.357   4
  -2   3  -7 7793.16 712.852   1
   2  -3   7 8021.73 354.186   5
  -2  -3  -7 8293.13 382.946  11
   2   3   7 8082.58 702.267   1
   2   3   7 8050.99 328.772   8
  -2   3  -7 7427.37 554.648   3
  -2  -3  -7 8045.02 716.579   1
   2  -3   7 7896.21 410.654   6
   2   3   8 1201.53 152.727   2
  -2  -3  -8 1436.97 177.011   7
   2   3   8 1282.75 290.885   1
   2  -3   8 1334.99 189.854   6
   2  -3   8 1219.51 276.838   3
   2   3   8 1401.06 154.952   8
   2   3   8 1711.96 216.858  10
   2  -3   8 1405.44 173.157   5
   2  -3   8 1710.13 218.380   4
  -2  -3  -8 1017.94 317.791   1
  -2   3  -8 1211.82 245.311   3
   2   3   9 4107.23 277.172   2
  -2   3  -9 4906.17 477.754   3
   2  -3   9 4956.38 518.415   3
  -2  -3  -9 4872.40 602.347   1
   2   3   9 5001.79 581.652   1
   2  -3   9 4665.75 351.519   4
   2   3   9 5111.72 284.917   8
  -2  -3  -9 5391.35 368.598   9
   2   3   9 4651.54 367.057  10
   2  -3   9 4574.02 299.363   5
  -2  -3  -9 5069.30 358.353   7
   2  -3   9 5129.11 347.403   6
   2   3  10 3628.26 255.478   2
   2   3  10 4817.92 595.600   1
   2  -3  10 4468.21 335.990   5
   2  -3  10 3821.53 472.541   3
  -2   3 -10 4895.88 478.671   3
  -2  -3 -10 4025.31 551.690   1
   2   3  10 3982.31 282.448   8
   2  -3  10 4636.27 354.870   6
   2   3  10 4193.44 370.842  10
  -2  -3 -10 3650.40 397.152   7
   2  -3  10 3849.84 348.510   4
  -2  -3 -11 3842.85 552.566   1
   2   3  11 3207.40 226.521   8
  -2  -3 -11 2823.15 294.274   7
   2  -3  11 3226.16 290.947   6
  -2   3 -11 3849.96 395.587   3
   2   3  11 3047.57 289.901  10
   2  -3  11 3578.81 307.675   4
   2  -3  11 3482.35 450.391   3
   2  -3  11 3596.45 269.267   5
   2   3  11 3783.11 492.440   1
   2   3  12 201.900 92.7037   8
  -2   3 -12-4.78796 107.798   3
   2   3  12 216.333 122.310  10
   2  -3  12 163.159 182.871   3
   2  -3  12-149.505 112.586   5
   2  -3  12 25.9716 102.763   4
   2  -3  12-82.0741 117.093   6
  -2  -3 -12 94.6170 168.115   1
  -2  -3 -12 84.8307 112.285   7
   2   3  12-137.368 192.976   1
   2  -3  13 4321.82 369.481   6
   2  -3  13 4700.13 379.562   4
   2   3  13 4801.15 572.150   1
   2   3  13 3947.66 262.476   8
   2  -3  13 4321.61 324.381   5
  -2   3 -13 5255.96 452.421   3
   2   3  13 3586.08 335.974  10
  -2  -3 -13 4955.00 633.018   1
   2  -3  13 4750.53 532.948   3
  -2  -3 -13 3859.44 355.855   7
   2   3  14 8576.14 410.476   8
   2  -3  14 8027.63 499.456   6
   2   3  14 7792.73 485.482  10
   2  -3  14 8005.16 441.729   5
   2   3  14 8289.21 750.320   1
   2  -3  14 7845.54 495.913   4
  -2   3 -14 7728.98 563.283   3
   2  -3  14 7651.37 687.092   3
  -2  -3 -14 8101.18 838.053   1
  -2  -3 -14 8529.81 540.233   7
   2   3  15 344.375 109.453   8
   2  -3  15 674.702 245.226   3
  -2  -3 -15 510.552 199.198   7
   2  -3  15 522.668 160.492   4
  -2   3 -15 494.131 147.886   3
   2   3  15 534.314 231.676   1
   2  -3  15 457.580 138.261   5
   2   3  15 420.837 143.097  10
  -2  -3 -15 619.042 299.911   1
   2  -3  16 474.942 158.390   3
   2   3  16 529.647 237.923   1
   2   3  16 755.317 198.764  10
  -2  -3 -16 796.128 236.693   7
  -2  -3 -16 423.725 203.330   1
   2  -3  16 395.763 124.193   4
   2  -3  16 652.890 150.070   5
   2   3  16 767.258 154.578   8
   2  -3  17 852.028 193.725   5
   2   3  17 960.474 170.001   8
  -2  -3 -17 1075.94 325.295   1
   2  -3  17 731.092 203.863   3
   2   3  17 950.780 280.574   1
   2  -3  17 732.888 182.013   4
   2   3  17 750.744 176.167  10
  -2  -3 -17 847.860 224.939   7
   2  -3  18 143.202 134.914   5
  -2  -3 -18 584.741 203.543   7
   2  -3  18 143.508 178.317   3
   2   3  18 355.948 140.932   8
   2   3  18 325.464 144.482  10
   2  -3  18 275.698 169.259   4
  -2  -3 -18 91.3609 135.317   1
   2   3  18 345.396 206.651   1
   2  -3  19 1944.12 261.030   5
  -2  -3 -19 1960.77 434.836   1
   2   3  19 2045.28 391.060   1
   2   3  19 2084.96 253.376   8
   2  -3  19 2011.77 343.125   3
  -2  -3 -19 1515.32 261.723   7
   2  -3  19 1786.54 269.110   4
   2   3  19 1863.18 291.113  10
  -2  -3 -20 2530.73 352.592   7
   2  -3  20 2679.15 426.404   3
  -2  -3 -20 2721.73 463.576   1
   2  -3  20 2818.17 306.146   5
   2   3  20 2553.56 420.335   1
   2  -3  20 2831.98 348.166   4
   2   3  20 2603.19 307.062   8
   2   3  20 2708.65 347.921  10
   2   3  21-157.020 148.443  10
   2  -3  21-86.9245 133.410   5
   2   3  21 23.0340 109.299   8
   2  -3  21 130.895 140.751   4
  -2  -3 -21-26.6444 155.530   7
   2   3  22 2140.22 283.416   8
  -2  -3 -22 2397.02 345.325   7
   2   3  22 2295.93 354.314  10
   2  -3  22 2384.61 352.988   4
   2  -3  22 2522.07 314.667   5
   2  -3  23 3949.69 450.509   4
  -2  -3 -23 3629.55 415.379   7
   2   3  23 2958.83 394.153  10
   2   3  23 3632.66 355.256   8
   2  -3  23 3912.83 399.958   5
  -2  -3 -24 224.524 181.580   7
   2   3  24 118.515 147.312   8
   2  -3  24 162.579 124.992   5
   2   3  24-11.2782 117.010  10
   2  -3  24 389.108 206.059   4
   2   3  25 279.857 124.701  10
   2  -3  25 305.394 177.964   4
  -2  -3 -25 405.150 201.513   7
   2  -3  25 304.690 180.359   5
   2   3  25 264.437 118.634   8
   2  -3  26 1063.31 257.646   4
   2   3  26 1089.39 278.048  10
   2   3  26 907.353 228.225   8
  -2  -3 -26 1070.90 267.795   7
   2  -3  26 988.589 232.621   5
   2   3  27 155.771 189.514  10
   2  -3  27 48.0438 131.966   4
   2   3  27 492.698 223.859   8
   2  -3  27 425.606 226.117   5
  -2  -3 -27 538.255 241.121   7
   2   3  28 159.995 182.762   8
   2  -3  28-61.1428 167.502   4
   2   3  28 124.824 232.677  10
  -2  -3 -28-420.089 207.165   7
   2  -3  28-17.7024 138.006   5
   2  -3  29 534.919 246.889   4
   2   3  29 252.052 210.704   8
   2   3  29 113.599 184.318  10
   2  -3  29 212.118 188.628   5
   2   3  29 139.118 152.482   5
   2  -3  30 1598.82 338.982   4
   2   3  30 1172.01 298.017   8
   2  -3  30 1323.62 324.049   5
   2   3  30 1407.86 290.234   5
   2  -3  31 798.923 262.623   4
   2   3  31 621.170 243.852   8
   2   3  31 280.092 175.880   5
[truncated: 2,587,895 more chars]
